# Supplementary material
Source: publisher site journal article supplement (https://www.dovepress.com/article/578871)
Supplement: Supplementary file 1 [file 578871%20Supplementary%20Tables.docx]

| **Supplementary Table 1.The result of local genetic correlation analysis(psoriasis vs beer intake)** | | | | | | | | | | | | |
| --- | --- | --- | --- | --- | --- | --- | --- | --- | --- | --- | --- | --- |
| phen1 | phen2 | log2FoldChange | rho.lower | rho.upper | r2 | r2.lower | r2.upper | p | padj | CHR | START | STOP |
| beer-intake | PS | -0.0655032 | -0.72308 | 0.55377 | 0.00429067 | 0 | 0.63301 | 0.80841 | 0.942903878 | 1 | 1376205 | 2215495 |
| beer-intake | PS | 0.127156 | -0.24133 | 0.54324 | 0.0161686 | 0 | 0.29677 | 0.49648 | 0.811076807 | 1 | 2983520 | 3582047 |
| beer-intake | PS | 0.292917 | -0.38296 | 1 | 0.0858006 | 0 | 1 | 0.354626 | 0.731000859 | 1 | 3582048 | 4281476 |
| beer-intake | PS | -0.594604 | -1 | -0.09732 | 0.353554 | 0.01269 | 1 | 0.0229126 | 0.299330206 | 1 | 4773404 | 5362404 |
| beer-intake | PS | 0.148951 | -0.59095 | 1 | 0.0221863 | 0 | 1 | 0.638049 | 0.873870499 | 1 | 6136815 | 7711794 |
| beer-intake | PS | 0.0874721 | -0.40363 | 0.62565 | 0.00765138 | 0 | 0.42186 | 0.701723 | 0.903972224 | 1 | 7711795 | 8580987 |
| beer-intake | PS | 0.0774081 | -0.32627 | 0.5132 | 0.00599201 | 0 | 0.28446 | 0.694784 | 0.903592034 | 1 | 8580988 | 9475966 |
| beer-intake | PS | 0.34106 | -0.24588 | 1 | 0.116322 | 0 | 1 | 0.228259 | 0.620938095 | 1 | 9475967 | 10753427 |
| beer-intake | PS | -0.00762 | -0.38208 | 0.35078 | 0.0000581 | 0 | 0.18869 | 0.96484 | 0.992181184 | 1 | 11709174 | 13481025 |
| beer-intake | PS | 0.496298 | 0.04311 | 1 | 0.246312 | 0.00494 | 1 | 0.0371672 | 0.350926523 | 1 | 13481026 | 14720131 |
| beer-intake | PS | -0.0824135 | -0.83637 | 0.58501 | 0.00679199 | 0 | 0.84144 | 0.770265 | 0.92959111 | 1 | 14720132 | 15755230 |
| beer-intake | PS | 0.14075 | -0.66144 | 1 | 0.0198107 | 0 | 1 | 0.675428 | 0.89679545 | 1 | 16732169 | 17557746 |
| beer-intake | PS | 0.785988 | 0.31911 | 1 | 0.617777 | 0.10183 | 1 | 0.00159726 | 0.127235394 | 1 | 17557747 | 18427820 |
| beer-intake | PS | -0.4462 | -0.91713 | -0.08844 | 0.199094 | 0.00923 | 0.84114 | 0.0164367 | 0.280108322 | 1 | 18427821 | 19238924 |
| beer-intake | PS | -0.280196 | -0.87391 | 0.19806 | 0.07851 | 0 | 0.76435 | 0.23757 | 0.626739596 | 1 | 21416122 | 22145629 |
| beer-intake | PS | -0.0619151 | -0.70575 | 0.50954 | 0.00383348 | 0 | 0.62976 | 0.795714 | 0.940138903 | 1 | 22740288 | 23907045 |
| beer-intake | PS | 0.274298 | -0.01571 | 0.60942 | 0.0752393 | 0 | 0.37139 | 0.0614255 | 0.411647175 | 1 | 23907046 | 25885138 |
| beer-intake | PS | 0.288216 | -0.31734 | 1 | 0.0830684 | 0 | 1 | 0.314855 | 0.695891758 | 1 | 25885139 | 27992665 |
| beer-intake | PS | 0.110316 | -0.34531 | 0.60124 | 0.0121697 | 0 | 0.37395 | 0.60883 | 0.861631208 | 1 | 29188427 | 30405182 |
| beer-intake | PS | -0.235986 | -1 | 0.45834 | 0.0556892 | 0 | 1 | 0.443627 | 0.782424675 | 1 | 30405183 | 31639217 |
| beer-intake | PS | 0.0196405 | -0.4349 | 0.47311 | 0.00038575 | 0 | 0.29092 | 0.92382 | 0.979618732 | 1 | 31639218 | 33066846 |
| beer-intake | PS | 0.144467 | -0.28345 | 0.61586 | 0.0208706 | 0 | 0.38129 | 0.485179 | 0.804362748 | 1 | 33066847 | 34371022 |
| beer-intake | PS | 0.202433 | -0.13583 | 0.5608 | 0.0409791 | 0 | 0.3145 | 0.227309 | 0.620938095 | 1 | 34371023 | 35201626 |
| beer-intake | PS | 0.597661 | 0.15968 | 1 | 0.357198 | 0.02583 | 1 | 0.00893069 | 0.224487887 | 1 | 36855140 | 38474036 |
| beer-intake | PS | 0.16222 | -0.45283 | 0.93924 | 0.0263154 | 0 | 0.96704 | 0.558838 | 0.844653041 | 1 | 38474037 | 40200950 |
| beer-intake | PS | -0.0282617 | -0.49375 | 0.4377 | 0.000798723 | 0 | 0.30469 | 0.897348 | 0.971785522 | 1 | 40200951 | 41093875 |
| beer-intake | PS | -0.362655 | -1 | 0.37028 | 0.131519 | 0 | 1 | 0.289499 | 0.675011382 | 1 | 41093876 | 41977966 |
| beer-intake | PS | -0.424977 | -1 | 0.11134 | 0.180606 | 0 | 1 | 0.11525 | 0.516275157 | 1 | 43512670 | 45167235 |
| beer-intake | PS | -0.355013 | -1 | 0.22407 | 0.126034 | 0 | 1 | 0.213706 | 0.610690702 | 1 | 54771294 | 55727134 |
| beer-intake | PS | 0.0737434 | -0.53039 | 0.77446 | 0.00543809 | 0 | 0.74043 | 0.774523 | 0.929934281 | 1 | 64344227 | 65894184 |
| beer-intake | PS | -0.247978 | -0.76381 | 0.17003 | 0.0614933 | 0 | 0.5834 | 0.236251 | 0.624503592 | 1 | 65894185 | 66778015 |
| beer-intake | PS | -0.236157 | -0.83284 | 0.13536 | 0.0557702 | 0 | 0.70309 | 0.210552 | 0.608744827 | 1 | 66778016 | 67761890 |
| beer-intake | PS | 0.0816459 | -0.4607 | 0.69077 | 0.00666605 | 0 | 0.52201 | 0.743737 | 0.920916669 | 1 | 68633861 | 69438909 |
| beer-intake | PS | 0.232503 | -0.40513 | 1 | 0.0540577 | 0 | 1 | 0.412701 | 0.767893591 | 1 | 76097248 | 76977915 |
| beer-intake | PS | -0.171241 | -0.8125 | 0.39123 | 0.0293234 | 0 | 0.67883 | 0.511968 | 0.822603387 | 1 | 76977916 | 77895394 |
| beer-intake | PS | -0.0386966 | -1 | 1 | 0.00149742 | 0 | 1 | 0.929634 | 0.980691399 | 1 | 77895395 | 79065286 |
| beer-intake | PS | 0.326877 | -0.22519 | 1 | 0.106848 | 0 | 1 | 0.224834 | 0.620938095 | 1 | 80781443 | 82123368 |
| beer-intake | PS | -0.153228 | -0.84955 | 0.44251 | 0.0234789 | 0 | 0.78607 | 0.55523 | 0.84420035 | 1 | 82123369 | 83461215 |
| beer-intake | PS | 0.00672552 | -0.65421 | 0.68295 | 0.0000452 | 0 | 0.78524 | 0.979747 | 0.996292185 | 1 | 89753965 | 90941549 |
| beer-intake | PS | -0.047708 | -0.66099 | 0.52461 | 0.00227605 | 0 | 0.54747 | 0.846113 | 0.952241578 | 1 | 90941550 | 91870059 |
| beer-intake | PS | 0.12835 | -0.46676 | 0.80472 | 0.0164737 | 0 | 0.70053 | 0.629774 | 0.870068479 | 1 | 95122542 | 96147576 |
| beer-intake | PS | 0.0502717 | -0.92249 | 1 | 0.00252724 | 0 | 1 | 0.888158 | 0.969577376 | 1 | 96147577 | 97721186 |
| beer-intake | PS | 0.296976 | -0.10963 | 0.77588 | 0.0881945 | 0 | 0.60199 | 0.14158 | 0.544641084 | 1 | 97721187 | 99425000 |
| beer-intake | PS | 0.890875 | 0.14446 | 1 | 0.793658 | 0.02839 | 1 | 0.0268249 | 0.305371 | 1 | 107874654 | 109271449 |
| beer-intake | PS | -0.332091 | -0.97295 | 0.15641 | 0.110284 | 0 | 0.95403 | 0.162732 | 0.574566392 | 1 | 109271450 | 110224230 |
| beer-intake | PS | -0.539825 | -1 | -0.12029 | 0.291411 | 0.01654 | 1 | 0.0157321 | 0.273599214 | 1 | 110224231 | 111134062 |
| beer-intake | PS | 0.333297 | -0.17835 | 1 | 0.111087 | 0 | 1 | 0.187643 | 0.593264316 | 1 | 112489249 | 113418037 |
| beer-intake | PS | 0.0148199 | -0.67061 | 0.71243 | 0.00022 | 0 | 0.74975 | 0.957253 | 0.990303547 | 1 | 114664388 | 116207297 |
| beer-intake | PS | 0.139518 | -0.31656 | 0.64389 | 0.0194654 | 0 | 0.42264 | 0.526869 | 0.826925474 | 1 | 116207298 | 117046311 |
| beer-intake | PS | 0.363113 | -0.24228 | 1 | 0.131851 | 0 | 1 | 0.217849 | 0.615142653 | 1 | 152535631 | 153410809 |
| beer-intake | PS | 0.346268 | -0.07171 | 0.94283 | 0.119901 | 0 | 0.88892 | 0.0966942 | 0.483313733 | 1 | 154685546 | 156813845 |
| beer-intake | PS | -0.573716 | -1 | -0.08679 | 0.32915 | 0.01066 | 1 | 0.0224324 | 0.297822026 | 1 | 156813846 | 158081627 |
| beer-intake | PS | 0.315352 | -0.12105 | 0.8465 | 0.099447 | 0 | 0.71656 | 0.14654 | 0.548224101 | 1 | 158900370 | 159882515 |
| beer-intake | PS | 0.0783333 | -0.65835 | 0.92785 | 0.0061361 | 0 | 1 | 0.800634 | 0.940600951 | 1 | 159882516 | 161054076 |
| beer-intake | PS | 0.159742 | -0.86445 | 1 | 0.0255175 | 0 | 1 | 0.688904 | 0.900892552 | 1 | 161054077 | 161945442 |
| beer-intake | PS | -0.271166 | -0.61652 | 0.03766 | 0.0735309 | 0 | 0.38009 | 0.0907897 | 0.478016906 | 1 | 161945443 | 163141862 |
| beer-intake | PS | 0.202263 | -0.15399 | 0.61922 | 0.0409102 | 0 | 0.38449 | 0.273045 | 0.657643783 | 1 | 163141863 | 163854567 |
| beer-intake | PS | -0.306012 | -0.93442 | 0.1727 | 0.0936436 | 0 | 0.87729 | 0.200747 | 0.602877424 | 1 | 165553813 | 166458031 |
| beer-intake | PS | 0.174123 | -0.3501 | 0.79624 | 0.0303187 | 0 | 0.65395 | 0.486587 | 0.805062382 | 1 | 167163955 | 168179086 |
| beer-intake | PS | 0.993478 | 0.28227 | 1 | 0.986998 | 0.0814 | 1 | 0.00862721 | 0.224487887 | 1 | 181324206 | 182420540 |
| beer-intake | PS | 0.308252 | -0.45115 | 1 | 0.0950196 | 0 | 1 | 0.3626 | 0.736639394 | 1 | 195161236 | 196179110 |
| beer-intake | PS | -0.15982 | -0.65288 | 0.27295 | 0.0255424 | 0 | 0.42836 | 0.448104 | 0.785321521 | 1 | 197935822 | 199263389 |
| beer-intake | PS | -0.22988 | -0.73561 | 0.2207 | 0.052845 | 0 | 0.54229 | 0.29279 | 0.676274498 | 1 | 200134006 | 201067952 |
| beer-intake | PS | -0.132307 | -1 | 0.7225 | 0.0175052 | 0 | 1 | 0.701385 | 0.903972224 | 1 | 201067953 | 202583884 |
| beer-intake | PS | -0.371805 | -0.88401 | 0.05276 | 0.138239 | 0 | 0.78148 | 0.0793238 | 0.4584705 | 1 | 202583885 | 204092537 |
| beer-intake | PS | -0.0317766 | -0.4144 | 0.34311 | 0.00100975 | 0 | 0.19858 | 0.857562 | 0.955614217 | 1 | 205917549 | 208162951 |
| beer-intake | PS | -0.525027 | -1 | -0.03052 | 0.275653 | 0.006 | 1 | 0.0424006 | 0.35870143 | 1 | 208162952 | 209711169 |
| beer-intake | PS | -0.337071 | -1 | 0.3137 | 0.113617 | 0 | 1 | 0.275351 | 0.661111191 | 1 | 212347583 | 213958292 |
| beer-intake | PS | -0.188218 | -0.87705 | 0.37877 | 0.0354262 | 0 | 0.79199 | 0.476965 | 0.800410688 | 1 | 213958293 | 214783872 |
| beer-intake | PS | -0.176469 | -1 | 0.64832 | 0.0311413 | 0 | 1 | 0.60989 | 0.861631208 | 1 | 214783873 | 215825791 |
| beer-intake | PS | 0.0919373 | -0.62081 | 0.86421 | 0.00845246 | 0 | 0.9031 | 0.754268 | 0.923275238 | 1 | 216658127 | 217352165 |
| beer-intake | PS | -0.438427 | -1 | 0.1019 | 0.192218 | 0 | 1 | 0.104476 | 0.497135592 | 1 | 220978152 | 221856864 |
| beer-intake | PS | -0.525874 | -1 | -0.07232 | 0.276543 | 0.00718 | 1 | 0.0254312 | 0.305371 | 1 | 226534712 | 228045554 |
| beer-intake | PS | 0.201617 | -0.42425 | 0.99177 | 0.0406493 | 0 | 1 | 0.477678 | 0.800410688 | 1 | 231287765 | 232177704 |
| beer-intake | PS | -0.205713 | -0.68039 | 0.2119 | 0.0423178 | 0 | 0.46512 | 0.318113 | 0.697286616 | 1 | 232177705 | 232954942 |
| beer-intake | PS | -0.114646 | -0.62299 | 0.31238 | 0.0131437 | 0 | 0.4135 | 0.56525 | 0.846061641 | 1 | 235097114 | 236199671 |
| beer-intake | PS | 0.00373446 | -0.41337 | 0.41849 | 0.0000139 | 0 | 0.23385 | 0.984608 | 0.997434779 | 1 | 240248509 | 241033584 |
| beer-intake | PS | 0.0975852 | -0.50882 | 0.78494 | 0.00952 | 0 | 0.66892 | 0.711922 | 0.906057359 | 1 | 243048004 | 244723196 |
| beer-intake | PS | -0.410013 | -1 | 0.35893 | 0.16811 | 0 | 1 | 0.252895 | 0.640696318 | 1 | 244723197 | 245970505 |
| beer-intake | PS | 0.254555 | -0.19361 | 0.81944 | 0.0647981 | 0 | 0.67611 | 0.238425 | 0.627980685 | 1 | 246610291 | 247531112 |
| beer-intake | PS | -0.0999783 | -1 | 0.81928 | 0.00999566 | 0 | 1 | 0.780341 | 0.93116321 | 1 | 248341595 | 249240538 |
| beer-intake | PS | 0.244628 | -0.16465 | 0.73542 | 0.059843 | 0 | 0.54084 | 0.227801 | 0.620938095 | 2 | 1875061 | 2680063 |
| beer-intake | PS | -0.256358 | -0.82311 | 0.21011 | 0.0657193 | 0 | 0.67988 | 0.262783 | 0.647735304 | 2 | 2680064 | 3314202 |
| beer-intake | PS | 0.25166 | -0.336 | 1 | 0.0633326 | 0 | 1 | 0.35769 | 0.733165841 | 2 | 3314203 | 4016104 |
| beer-intake | PS | -0.0571925 | -0.91717 | 0.74755 | 0.00327098 | 0 | 1 | 0.856351 | 0.955614217 | 2 | 5568654 | 6306606 |
| beer-intake | PS | -0.345268 | -0.83874 | 0.04872 | 0.11921 | 0 | 0.70458 | 0.0941974 | 0.482879102 | 2 | 6306607 | 7108208 |
| beer-intake | PS | 0.114656 | -0.59854 | 0.9148 | 0.013146 | 0 | 1 | 0.695105 | 0.903592034 | 2 | 9960671 | 10611654 |
| beer-intake | PS | -0.296047 | -1 | 0.4156 | 0.0876438 | 0 | 1 | 0.36197 | 0.736639394 | 2 | 15721704 | 17241115 |
| beer-intake | PS | 0.285562 | -0.27893 | 1 | 0.0815456 | 0 | 1 | 0.299307 | 0.68465469 | 2 | 17241116 | 18656325 |
| beer-intake | PS | -0.795398 | -1 | -0.13279 | 0.632658 | 0.02338 | 1 | 0.0237848 | 0.303629549 | 2 | 20064518 | 21084898 |
| beer-intake | PS | 0.093351 | -0.27909 | 0.48264 | 0.00871442 | 0 | 0.24453 | 0.605405 | 0.860368673 | 2 | 22429641 | 23538527 |
| beer-intake | PS | 0.131627 | -0.36626 | 0.72357 | 0.0173258 | 0 | 0.56838 | 0.569436 | 0.848619143 | 2 | 23538528 | 24669224 |
| beer-intake | PS | -0.122639 | -1 | 0.78709 | 0.0150403 | 0 | 1 | 0.727735 | 0.913309359 | 2 | 24669225 | 25895394 |
| beer-intake | PS | 0.318817 | -0.13292 | 0.8998 | 0.101644 | 0 | 0.80965 | 0.154802 | 0.562384129 | 2 | 25895395 | 26894102 |
| beer-intake | PS | -0.0474132 | -0.57053 | 0.45781 | 0.00224801 | 0 | 0.39329 | 0.830949 | 0.946695205 | 2 | 26894103 | 28819510 |
| beer-intake | PS | 0.856082 | 0.25256 | 1 | 0.732876 | 0.06543 | 1 | 0.00866113 | 0.224487887 | 2 | 29627933 | 30575619 |
| beer-intake | PS | 0.346476 | -0.09805 | 0.94009 | 0.120045 | 0 | 0.88377 | 0.126237 | 0.529965172 | 2 | 30575620 | 31457418 |
| beer-intake | PS | 0.0716385 | -0.39207 | 0.56546 | 0.00513207 | 0 | 0.34221 | 0.743839 | 0.920916669 | 2 | 33123605 | 33735318 |
| beer-intake | PS | -0.446444 | -1 | 0.15878 | 0.199312 | 0 | 1 | 0.145268 | 0.546595954 | 2 | 37603361 | 38887393 |
| beer-intake | PS | 0.369411 | -0.29837 | 1 | 0.136465 | 0 | 1 | 0.256657 | 0.643621228 | 2 | 38887394 | 40087418 |
| beer-intake | PS | 0.013511 | -0.59494 | 0.68572 | 0.000182548 | 0 | 0.72912 | 0.95822 | 0.990362823 | 2 | 49849186 | 50756240 |
| beer-intake | PS | 0.0951292 | -0.60248 | 0.86683 | 0.00905 | 0 | 0.85969 | 0.745149 | 0.921490585 | 2 | 50756241 | 51669493 |
| beer-intake | PS | 0.0205262 | -0.82609 | 0.96647 | 0.000421324 | 0 | 1 | 0.951772 | 0.988457854 | 2 | 57433654 | 57952945 |
| beer-intake | PS | -0.170489 | -1 | 0.58961 | 0.0290666 | 0 | 1 | 0.586728 | 0.855475038 | 2 | 57952946 | 59251996 |
| beer-intake | PS | 0.0288071 | -0.32706 | 0.394 | 0.000829852 | 0 | 0.1838 | 0.866343 | 0.958839385 | 2 | 59251997 | 60775066 |
| beer-intake | PS | 0.197268 | -0.21476 | 0.71329 | 0.0389148 | 0 | 0.5141 | 0.317588 | 0.697286616 | 2 | 62429911 | 63672118 |
| beer-intake | PS | 0.0506736 | -0.72998 | 0.84899 | 0.00256781 | 0 | 1 | 0.865534 | 0.958635788 | 2 | 64696090 | 65938002 |
| beer-intake | PS | 0.357752 | -0.17751 | 1 | 0.127987 | 0 | 1 | 0.182854 | 0.587671259 | 2 | 68877775 | 70756283 |
| beer-intake | PS | -0.238955 | -0.75658 | 0.20294 | 0.0570996 | 0 | 0.57346 | 0.270306 | 0.654942995 | 2 | 71385814 | 72160302 |
| beer-intake | PS | -0.0782632 | -1 | 0.86748 | 0.00612512 | 0 | 1 | 0.828483 | 0.946423742 | 2 | 72160303 | 73544290 |
| beer-intake | PS | 0.352681 | -0.22315 | 1 | 0.124384 | 0 | 1 | 0.213608 | 0.610690702 | 2 | 73544291 | 75148103 |
| beer-intake | PS | 0.166044 | -0.55884 | 1 | 0.0275706 | 0 | 1 | 0.593217 | 0.856056811 | 2 | 75148104 | 75942397 |
| beer-intake | PS | 0.0234647 | -0.88846 | 0.93549 | 0.000550591 | 0 | 1 | 0.944099 | 0.986696747 | 2 | 75942398 | 76649030 |
| beer-intake | PS | 0.112389 | -0.45333 | 0.75782 | 0.0126313 | 0 | 0.62196 | 0.66651 | 0.893527746 | 2 | 76649031 | 77372830 |
| beer-intake | PS | 0.0622833 | -0.4928 | 0.66948 | 0.00387921 | 0 | 0.51861 | 0.803108 | 0.941469324 | 2 | 77372831 | 78080057 |
| beer-intake | PS | 0.37167 | -0.10966 | 1 | 0.138138 | 0 | 1 | 0.129635 | 0.534632683 | 2 | 84395900 | 85992794 |
| beer-intake | PS | -0.168552 | -1 | 0.59976 | 0.0284098 | 0 | 1 | 0.60844 | 0.861631208 | 2 | 85992795 | 86867032 |
| beer-intake | PS | -0.0135591 | -0.78231 | 0.7379 | 0.000183848 | 0 | 0.9077 | 0.963274 | 0.991317435 | 2 | 100202437 | 101556799 |
| beer-intake | PS | 0.260399 | -0.2228 | 0.88694 | 0.0678074 | 0 | 0.79196 | 0.26172 | 0.646579062 | 2 | 107412296 | 108417773 |
| beer-intake | PS | 0.348286 | -0.10487 | 0.95063 | 0.121303 | 0 | 0.90417 | 0.127854 | 0.532778211 | 2 | 108417774 | 110097868 |
| beer-intake | PS | 0.0665878 | -0.31298 | 0.45168 | 0.00443394 | 0 | 0.22066 | 0.718372 | 0.907271056 | 2 | 110097869 | 112644828 |
| beer-intake | PS | -0.191858 | -1 | 0.50422 | 0.0368094 | 0 | 1 | 0.531445 | 0.830884464 | 2 | 113930669 | 115203835 |
| beer-intake | PS | -0.334418 | -0.95879 | 0.12938 | 0.111836 | 0 | 0.9223 | 0.156077 | 0.564405174 | 2 | 121073753 | 122026817 |
| beer-intake | PS | -0.00372515 | -1 | 1 | 0.0000139 | 0 | 1 | 0.992213 | 0.998435708 | 2 | 122026818 | 123219243 |
| beer-intake | PS | 0.344335 | -0.66666 | 1 | 0.118567 | 0 | 1 | 0.41493 | 0.767893591 | 2 | 124730992 | 125741528 |
| beer-intake | PS | 0.364773 | -0.26837 | 1 | 0.133059 | 0 | 1 | 0.23467 | 0.623622636 | 2 | 126754028 | 127895644 |
| beer-intake | PS | -0.511766 | -1 | 0.22381 | 0.261904 | 0 | 1 | 0.144716 | 0.545911712 | 2 | 129486898 | 130485398 |
| beer-intake | PS | -0.284565 | -0.67943 | 0.04668 | 0.0809771 | 0 | 0.46162 | 0.0953302 | 0.482879102 | 2 | 133352951 | 134359059 |
| beer-intake | PS | 0.142691 | -0.44803 | 0.80952 | 0.0203609 | 0 | 0.67945 | 0.593683 | 0.856056811 | 2 | 134359060 | 135160197 |
| beer-intake | PS | 0.887303 | 0.4826 | 1 | 0.787306 | 0.23291 | 1 | 0.000106418 | 0.03861791 | 2 | 135160198 | 137061003 |
| beer-intake | PS | 0.447932 | -0.2092 | 1 | 0.200643 | 0 | 1 | 0.171 | 0.582296617 | 2 | 138073792 | 139505819 |
| beer-intake | PS | 0.407785 | -0.38627 | 1 | 0.166289 | 0 | 1 | 0.272125 | 0.656699802 | 2 | 140934532 | 141802664 |
| beer-intake | PS | -0.408255 | -1 | 0.27897 | 0.166672 | 0 | 1 | 0.211113 | 0.609002437 | 2 | 143259781 | 144503688 |
| beer-intake | PS | 0.209496 | -0.80212 | 1 | 0.0438885 | 0 | 1 | 0.61083 | 0.86163172 | 2 | 144503689 | 145977920 |
| beer-intake | PS | 0.337225 | -0.20383 | 1 | 0.113721 | 0 | 1 | 0.202192 | 0.602877424 | 2 | 147252197 | 149568875 |
| beer-intake | PS | -0.909476 | -1 | -0.15988 | 0.827146 | 0.03325 | 1 | 0.0242184 | 0.303629549 | 2 | 153999310 | 155207969 |
| beer-intake | PS | 0.156715 | -0.23879 | 0.62225 | 0.0245594 | 0 | 0.39117 | 0.423999 | 0.770730563 | 2 | 157556097 | 159040979 |
| beer-intake | PS | 0.609999 | 0.01499 | 1 | 0.372099 | 0.00513 | 1 | 0.050733 | 0.375723306 | 2 | 159040980 | 160200379 |
| beer-intake | PS | -0.00851594 | -0.56918 | 0.54354 | 0.0000725 | 0 | 0.50856 | 0.97092 | 0.993719113 | 2 | 161432090 | 163607635 |
| beer-intake | PS | 0.29831 | -0.13958 | 0.84295 | 0.0889889 | 0 | 0.71057 | 0.177399 | 0.582296617 | 2 | 163607636 | 164702312 |
| beer-intake | PS | -0.417316 | -1 | 0.3455 | 0.174153 | 0 | 1 | 0.235843 | 0.624200355 | 2 | 164702313 | 165917788 |
| beer-intake | PS | -0.166365 | -1 | 0.74384 | 0.0276774 | 0 | 1 | 0.651562 | 0.884471335 | 2 | 165917789 | 167488576 |
| beer-intake | PS | -0.29587 | -0.97868 | 0.20898 | 0.0875388 | 0 | 0.95977 | 0.230637 | 0.622398612 | 2 | 169224446 | 170155561 |
| beer-intake | PS | 0.0288113 | -0.43303 | 0.49677 | 0.00083009 | 0 | 0.29919 | 0.892068 | 0.971164696 | 2 | 170865766 | 171566482 |
| beer-intake | PS | 0.124034 | -0.32853 | 0.62315 | 0.0153844 | 0 | 0.40801 | 0.571752 | 0.849947167 | 2 | 174118390 | 174927563 |
| beer-intake | PS | 0.405148 | -0.29768 | 1 | 0.164145 | 0 | 1 | 0.234235 | 0.622973542 | 2 | 174927564 | 176734750 |
| beer-intake | PS | -0.176161 | -0.86579 | 0.44026 | 0.0310327 | 0 | 0.79968 | 0.516576 | 0.822603387 | 2 | 178149982 | 179224870 |
| beer-intake | PS | 0.186893 | -0.4047 | 0.92812 | 0.0349292 | 0 | 0.8713 | 0.499586 | 0.813789464 | 2 | 179224871 | 180336045 |
| beer-intake | PS | -0.422747 | -1 | 0.08482 | 0.178715 | 0 | 1 | 0.0974755 | 0.48449472 | 2 | 184148656 | 184866232 |
| beer-intake | PS | -0.0516709 | -0.57485 | 0.4632 | 0.00266988 | 0 | 0.38564 | 0.826154 | 0.945132354 | 2 | 195300251 | 196446299 |
| beer-intake | PS | -0.173704 | -0.51763 | 0.14159 | 0.0301729 | 0 | 0.2699 | 0.275879 | 0.661111191 | 2 | 196446300 | 198140350 |
| beer-intake | PS | 0.553989 | -0.00088 | 1 | 0.306903 | 0 | 1 | 0.0505192 | 0.375723306 | 2 | 198140351 | 199654969 |
| beer-intake | PS | 0.23602 | -0.53414 | 1 | 0.0557053 | 0 | 1 | 0.484288 | 0.803432683 | 2 | 199654970 | 201324132 |
| beer-intake | PS | -0.45367 | -0.84102 | -0.12248 | 0.205816 | 0.01583 | 0.70731 | 0.00821475 | 0.219609823 | 2 | 202504863 | 203639686 |
| beer-intake | PS | -0.830306 | -1 | 0.01519 | 0.689407 | 0 | 1 | 0.0596147 | 0.406350706 | 2 | 203639687 | 205038119 |
| beer-intake | PS | 0.223534 | -0.21209 | 0.78562 | 0.0499675 | 0 | 0.61964 | 0.291763 | 0.67501725 | 2 | 205038120 | 206821199 |
| beer-intake | PS | 0.0605985 | -0.45749 | 0.61874 | 0.00367218 | 0 | 0.44672 | 0.79765 | 0.940138903 | 2 | 207726595 | 208674588 |
| beer-intake | PS | 0.140794 | -0.75193 | 1 | 0.0198229 | 0 | 1 | 0.689812 | 0.900892552 | 2 | 210842458 | 212520453 |
| beer-intake | PS | -0.0553184 | -0.52979 | 0.42306 | 0.00306013 | 0 | 0.33017 | 0.797434 | 0.940138903 | 2 | 213194363 | 214044566 |
| beer-intake | PS | -0.142689 | -0.82869 | 0.44126 | 0.0203602 | 0 | 0.73275 | 0.588718 | 0.855475038 | 2 | 215002485 | 215899570 |
| beer-intake | PS | -0.207627 | -0.72195 | 0.2121 | 0.0431088 | 0 | 0.5249 | 0.322493 | 0.702643187 | 2 | 215899571 | 217566011 |
| beer-intake | PS | -0.254085 | -0.91698 | 0.25758 | 0.0645591 | 0 | 0.85551 | 0.298179 | 0.683405343 | 2 | 217566012 | 218396258 |
| beer-intake | PS | 0.13632 | -0.77683 | 1 | 0.0185831 | 0 | 1 | 0.715655 | 0.906613519 | 2 | 219678784 | 220771552 |
| beer-intake | PS | -0.223761 | -1 | 0.40205 | 0.0500691 | 0 | 1 | 0.440547 | 0.779698231 | 2 | 220771553 | 221445191 |
| beer-intake | PS | 0.12628 | -0.3881 | 0.73559 | 0.0159467 | 0 | 0.56803 | 0.603387 | 0.859800149 | 2 | 224938732 | 226242842 |
| beer-intake | PS | 0.508682 | 0.15213 | 1 | 0.258757 | 0.02345 | 1 | 0.00653 | 0.200879756 | 2 | 227557842 | 228812485 |
| beer-intake | PS | 0.234277 | -0.24249 | 0.82867 | 0.0548857 | 0 | 0.69563 | 0.306281 | 0.688921313 | 2 | 230541093 | 231847386 |
| beer-intake | PS | -0.339997 | -0.98613 | 0.16301 | 0.115598 | 0 | 0.97246 | 0.161599 | 0.574093371 | 2 | 231847387 | 233352722 |
| beer-intake | PS | -0.0749222 | -0.68159 | 0.49076 | 0.00561333 | 0 | 0.54226 | 0.766972 | 0.928727895 | 2 | 233352723 | 234115092 |
| beer-intake | PS | -0.0147832 | -0.84271 | 0.81707 | 0.000218543 | 0 | 1 | 0.962478 | 0.991317435 | 2 | 234945578 | 235625789 |
| beer-intake | PS | -0.0755614 | -1 | 0.8984 | 0.00570953 | 0 | 1 | 0.834287 | 0.948740022 | 2 | 236276288 | 237194297 |
| beer-intake | PS | 0.235733 | -0.33627 | 1 | 0.05557 | 0 | 1 | 0.373175 | 0.744263178 | 2 | 237194298 | 238185482 |
| beer-intake | PS | 0.119987 | -0.39376 | 0.7005 | 0.014397 | 0 | 0.51896 | 0.614373 | 0.863358047 | 2 | 239634351 | 240325600 |
| beer-intake | PS | 0.228044 | -0.14782 | 0.66988 | 0.052004 | 0 | 0.44875 | 0.223956 | 0.620938095 | 2 | 240325601 | 241113279 |
| beer-intake | PS | 0.311448 | -0.55121 | 1 | 0.0969998 | 0 | 1 | 0.412059 | 0.767893591 | 2 | 241113280 | 241910366 |
| beer-intake | PS | 0.280174 | -0.09172 | 0.74214 | 0.0784972 | 0 | 0.55077 | 0.132968 | 0.538133195 | 2 | 241910367 | 243188366 |
| beer-intake | PS | -0.279937 | -1 | 0.86695 | 0.0783647 | 0 | 1 | 0.527437 | 0.826984754 | 3 | 4109394 | 4835083 |
| beer-intake | PS | 0.145889 | -0.33751 | 0.70083 | 0.0212835 | 0 | 0.50424 | 0.526914 | 0.826925474 | 3 | 4835084 | 5496182 |
| beer-intake | PS | 0.229482 | -0.47234 | 1 | 0.0526621 | 0 | 1 | 0.459887 | 0.792607357 | 3 | 8664893 | 9970731 |
| beer-intake | PS | -0.0757133 | -0.55054 | 0.37228 | 0.00573251 | 0 | 0.32819 | 0.716218 | 0.906613519 | 3 | 9970732 | 11226367 |
| beer-intake | PS | -0.0239353 | -0.64299 | 0.57055 | 0.0005729 | 0 | 0.53305 | 0.927145 | 0.980084322 | 3 | 11226368 | 11997658 |
| beer-intake | PS | -0.00864639 | -0.65238 | 0.64161 | 0.0000748 | 0 | 0.62856 | 0.974861 | 0.995069902 | 3 | 12859210 | 14312007 |
| beer-intake | PS | -0.232695 | -0.99683 | 0.35372 | 0.0541469 | 0 | 1 | 0.393059 | 0.754486297 | 3 | 14312008 | 15150876 |
| beer-intake | PS | -0.4645 | -1 | 0.16234 | 0.215761 | 0 | 1 | 0.144043 | 0.545236775 | 3 | 16084006 | 17182494 |
| beer-intake | PS | -0.249774 | -1 | 0.55064 | 0.0623871 | 0 | 1 | 0.466407 | 0.796697313 | 3 | 19030989 | 20754842 |
| beer-intake | PS | 0.179861 | -0.50983 | 1 | 0.0323498 | 0 | 1 | 0.553649 | 0.843974883 | 3 | 20754843 | 21790867 |
| beer-intake | PS | -0.0164416 | -1 | 1 | 0.000270326 | 0 | 1 | 0.971351 | 0.993719113 | 3 | 22648002 | 23426044 |
| beer-intake | PS | 0.107641 | -0.34111 | 0.59542 | 0.0115865 | 0 | 0.36594 | 0.610476 | 0.861631208 | 3 | 24270190 | 25516193 |
| beer-intake | PS | -0.140985 | -1 | 1 | 0.0198768 | 0 | 1 | 0.738029 | 0.917849189 | 3 | 35913034 | 36840136 |
| beer-intake | PS | -0.0400862 | -0.5273 | 0.44212 | 0.0016069 | 0 | 0.33057 | 0.855813 | 0.955614217 | 3 | 36840137 | 38729767 |
| beer-intake | PS | 0.554002 | 0.02022 | 1 | 0.306918 | 0.00513 | 1 | 0.0433949 | 0.360793635 | 3 | 40897628 | 42301657 |
| beer-intake | PS | 0.047624 | -0.33106 | 0.441 | 0.00226804 | 0 | 0.21829 | 0.796043 | 0.940138903 | 3 | 42301658 | 44141693 |
| beer-intake | PS | 0.0688446 | -0.39771 | 0.5657 | 0.00473958 | 0 | 0.33827 | 0.755467 | 0.923275238 | 3 | 45844192 | 47588461 |
| beer-intake | PS | -0.0711302 | -0.58675 | 0.44148 | 0.00505951 | 0 | 0.38857 | 0.761974 | 0.927200851 | 3 | 47588462 | 50387742 |
| beer-intake | PS | -0.22336 | -0.71942 | 0.20221 | 0.0498896 | 0 | 0.51927 | 0.276004 | 0.661111191 | 3 | 54074845 | 54892586 |
| beer-intake | PS | -0.311677 | -1 | 0.5526 | 0.0971426 | 0 | 1 | 0.410929 | 0.76747083 | 3 | 58557719 | 59998583 |
| beer-intake | PS | 0.682017 | -0.09322 | 1 | 0.465147 | 0 | 1 | 0.0949668 | 0.482879102 | 3 | 62609819 | 63670803 |
| beer-intake | PS | 0.528182 | -0.00806 | 1 | 0.278976 | 0 | 1 | 0.0554722 | 0.392998276 | 3 | 67454741 | 68319770 |
| beer-intake | PS | 0.187307 | -0.46704 | 1 | 0.0350839 | 0 | 1 | 0.541117 | 0.837974453 | 3 | 68319771 | 69784969 |
| beer-intake | PS | -0.0278817 | -0.41321 | 0.34094 | 0.000777387 | 0 | 0.20603 | 0.870391 | 0.96037061 | 3 | 71223282 | 72334704 |
| beer-intake | PS | -0.0681432 | -0.91534 | 0.73597 | 0.00464349 | 0 | 1 | 0.829523 | 0.946591485 | 3 | 76157471 | 77507832 |
| beer-intake | PS | 0.302151 | -0.02437 | 0.6835 | 0.0912954 | 0 | 0.46717 | 0.0720018 | 0.442981945 | 3 | 82532743 | 83529394 |
| beer-intake | PS | -0.393882 | -1 | 0.33253 | 0.155143 | 0 | 1 | 0.259684 | 0.645890617 | 3 | 85807680 | 86660979 |
| beer-intake | PS | -0.578643 | -1 | 0.21848 | 0.334827 | 0 | 1 | 0.127013 | 0.531145273 | 3 | 98212869 | 99045104 |
| beer-intake | PS | 0.346857 | -0.06009 | 0.86298 | 0.12031 | 0 | 0.74473 | 0.0938939 | 0.482879102 | 3 | 100552523 | 101906989 |
| beer-intake | PS | 1 | 0.36425 | 1 | 1 | 0.13381 | 1 | 0.00327783 | 0.172667625 | 3 | 101906990 | 103450271 |
| beer-intake | PS | -0.101719 | -0.81707 | 0.508 | 0.0103468 | 0 | 0.76467 | 0.699211 | 0.903972224 | 3 | 104878978 | 106174685 |
| beer-intake | PS | -0.288025 | -0.99157 | 0.17015 | 0.0829583 | 0 | 0.98897 | 0.207159 | 0.604688236 | 3 | 106174686 | 107736519 |
| beer-intake | PS | -0.0167375 | -0.69014 | 0.65635 | 0.000280142 | 0 | 0.68695 | 0.952009 | 0.988457854 | 3 | 116498571 | 117241644 |
| beer-intake | PS | 0.313261 | -0.22268 | 1 | 0.0981327 | 0 | 1 | 0.229872 | 0.622006588 | 3 | 119759984 | 120574477 |
| beer-intake | PS | -0.0603837 | -0.80376 | 0.64982 | 0.00364619 | 0 | 0.86476 | 0.835343 | 0.948975213 | 3 | 122340833 | 123518507 |
| beer-intake | PS | 0.437321 | -0.27382 | 1 | 0.191249 | 0 | 1 | 0.211395 | 0.609002437 | 3 | 131373471 | 132124018 |
| beer-intake | PS | 0.14477 | -0.62856 | 1 | 0.0209585 | 0 | 1 | 0.653044 | 0.885731605 | 3 | 132925968 | 133718493 |
| beer-intake | PS | 0.360995 | -0.02922 | 0.88429 | 0.130318 | 0 | 0.78197 | 0.0724811 | 0.443302009 | 3 | 133718494 | 135288394 |
| beer-intake | PS | 0.461474 | -0.16364 | 1 | 0.212959 | 0 | 1 | 0.143426 | 0.545236775 | 3 | 135288395 | 137372141 |
| beer-intake | PS | -0.453187 | -1 | 0.22455 | 0.205378 | 0 | 1 | 0.165575 | 0.577743536 | 3 | 141034638 | 141898978 |
| beer-intake | PS | -0.0237518 | -0.49824 | 0.46565 | 0.000564147 | 0 | 0.33346 | 0.913152 | 0.977166335 | 3 | 141898979 | 142976707 |
| beer-intake | PS | -0.169292 | -0.66727 | 0.27141 | 0.0286596 | 0 | 0.45137 | 0.4346 | 0.774360938 | 3 | 148638309 | 149998411 |
| beer-intake | PS | -0.664281 | -1 | -0.23212 | 0.44127 | 0.05396 | 1 | 0.00421735 | 0.178799682 | 3 | 149998412 | 151131307 |
| beer-intake | PS | -0.00751379 | -0.66212 | 0.65497 | 0.0000565 | 0 | 0.67159 | 0.97721 | 0.996093315 | 3 | 158460059 | 159478751 |
| beer-intake | PS | 0.299722 | -0.15796 | 0.91356 | 0.0898334 | 0 | 0.83576 | 0.189838 | 0.596557161 | 3 | 167118894 | 168972662 |
| beer-intake | PS | -0.0646399 | -0.82311 | 0.62418 | 0.00417832 | 0 | 0.81882 | 0.821544 | 0.944550594 | 3 | 168972663 | 170174578 |
| beer-intake | PS | -0.116299 | -0.82188 | 0.49159 | 0.0135255 | 0 | 0.7395 | 0.661026 | 0.891007394 | 3 | 171134850 | 172004760 |
| beer-intake | PS | 0.260449 | -0.32794 | 1 | 0.0678337 | 0 | 1 | 0.341946 | 0.71676685 | 3 | 172004761 | 173415591 |
| beer-intake | PS | 0.109388 | -0.43117 | 0.73521 | 0.0119658 | 0 | 0.56566 | 0.66254 | 0.891843705 | 3 | 173415592 | 174684707 |
| beer-intake | PS | -0.179212 | -0.74635 | 0.34414 | 0.0321171 | 0 | 0.57362 | 0.448446 | 0.785321521 | 3 | 183203156 | 184524268 |
| beer-intake | PS | 0.256452 | -0.49222 | 1 | 0.0657676 | 0 | 1 | 0.437252 | 0.776544335 | 3 | 186602046 | 187939199 |
| beer-intake | PS | -0.0894032 | -0.53476 | 0.30852 | 0.00799292 | 0 | 0.3124 | 0.629532 | 0.870068479 | 3 | 187939200 | 189451805 |
| beer-intake | PS | 0.102933 | -0.37587 | 0.61215 | 0.0105953 | 0 | 0.39328 | 0.638374 | 0.873870499 | 3 | 189451806 | 190591293 |
| beer-intake | PS | 0.220866 | -0.19692 | 0.68396 | 0.0487816 | 0 | 0.46898 | 0.281146 | 0.668043079 | 3 | 193122091 | 194217140 |
| beer-intake | PS | -0.0761712 | -0.46116 | 0.29897 | 0.00580205 | 0 | 0.22227 | 0.672342 | 0.89679545 | 3 | 194217141 | 195196789 |
| beer-intake | PS | 0.349942 | -0.0383 | 0.81729 | 0.12246 | 0 | 0.66796 | 0.0765163 | 0.453737497 | 4 | 1529268 | 2468935 |
| beer-intake | PS | -0.0651032 | -0.80024 | 0.63589 | 0.00423843 | 0 | 0.81427 | 0.821052 | 0.944542385 | 4 | 2468936 | 3549229 |
| beer-intake | PS | 0.224929 | -0.23849 | 0.80609 | 0.0505929 | 0 | 0.65272 | 0.316479 | 0.696509713 | 4 | 3549230 | 4266178 |
| beer-intake | PS | 0.928589 | 0.19993 | 1 | 0.862277 | 0.04371 | 1 | 0.0158329 | 0.273599214 | 4 | 4266179 | 5051834 |
| beer-intake | PS | -0.160259 | -0.53838 | 0.19906 | 0.0256829 | 0 | 0.29037 | 0.363703 | 0.737797514 | 4 | 7135820 | 7726034 |
| beer-intake | PS | -0.181619 | -0.81374 | 0.35433 | 0.0329856 | 0 | 0.67175 | 0.478874 | 0.800410688 | 4 | 7726035 | 8309826 |
| beer-intake | PS | 0.159731 | -0.51829 | 1 | 0.025514 | 0 | 1 | 0.597373 | 0.856916929 | 4 | 13127577 | 14395886 |
| beer-intake | PS | -0.122001 | -0.98956 | 0.5877 | 0.0148843 | 0 | 1 | 0.685062 | 0.900136915 | 4 | 14967148 | 15910801 |
| beer-intake | PS | -0.319076 | -1 | 0.29182 | 0.10181 | 0 | 1 | 0.268537 | 0.653020309 | 4 | 15910802 | 17290236 |
| beer-intake | PS | 0.467873 | -0.0898 | 1 | 0.218905 | 0 | 1 | 0.095635 | 0.482879102 | 4 | 17290237 | 18753263 |
| beer-intake | PS | 0.0555361 | -0.46947 | 0.60464 | 0.00308426 | 0 | 0.44067 | 0.817086 | 0.944542385 | 4 | 18753264 | 20086838 |
| beer-intake | PS | 0.578491 | -0.08572 | 1 | 0.334652 | 0 | 1 | 0.0940787 | 0.482879102 | 4 | 21416381 | 22835185 |
| beer-intake | PS | 0.242288 | -0.10887 | 0.6522 | 0.0587033 | 0 | 0.42536 | 0.175017 | 0.582296617 | 4 | 25832019 | 27385580 |
| beer-intake | PS | -0.181209 | -1 | 1 | 0.0328367 | 0 | 1 | 0.696825 | 0.903824643 | 4 | 32260118 | 32746820 |
| beer-intake | PS | -0.703121 | -1 | 0.01969 | 0.494379 | 0 | 1 | 0.0638665 | 0.419256682 | 4 | 39820062 | 40590541 |
| beer-intake | PS | 0.256636 | -0.26724 | 0.93608 | 0.0658622 | 0 | 0.88847 | 0.305588 | 0.688484504 | 4 | 41360938 | 42189251 |
| beer-intake | PS | 0.0664425 | -0.39628 | 0.55615 | 0.00441461 | 0 | 0.33998 | 0.764258 | 0.928331968 | 4 | 43962562 | 45186767 |
| beer-intake | PS | 0.647969 | 0.02065 | 1 | 0.419864 | 0.00623 | 1 | 0.0461885 | 0.366783605 | 4 | 46358361 | 47408265 |
| beer-intake | PS | -0.197327 | -1 | 0.68301 | 0.0389381 | 0 | 1 | 0.582906 | 0.855326666 | 4 | 54659779 | 55681701 |
| beer-intake | PS | -0.235836 | -0.8413 | 0.25521 | 0.0556184 | 0 | 0.70778 | 0.32222 | 0.702517036 | 4 | 57103101 | 58011085 |
| beer-intake | PS | -0.381182 | -0.85757 | 0.0219 | 0.1453 | 0 | 0.73543 | 0.0599697 | 0.406350706 | 4 | 58011086 | 58940256 |
| beer-intake | PS | 0.0273677 | -0.39158 | 0.47268 | 0.000748993 | 0 | 0.26563 | 0.893492 | 0.971310138 | 4 | 61971162 | 63337954 |
| beer-intake | PS | -0.0881404 | -0.94919 | 0.68146 | 0.00776872 | 0 | 1 | 0.782218 | 0.932381018 | 4 | 67616363 | 68742859 |
| beer-intake | PS | -0.315336 | -1 | 0.51899 | 0.0994365 | 0 | 1 | 0.389811 | 0.754287344 | 4 | 71468301 | 73258294 |
| beer-intake | PS | -0.31953 | -0.80733 | 0.10166 | 0.1021 | 0 | 0.65179 | 0.128588 | 0.53363203 | 4 | 73258295 | 74885900 |
| beer-intake | PS | -0.146971 | -0.63842 | 0.28688 | 0.0216005 | 0 | 0.41453 | 0.482655 | 0.802622826 | 4 | 74885901 | 76497358 |
| beer-intake | PS | 0.279643 | -0.24986 | 1 | 0.0782003 | 0 | 1 | 0.278067 | 0.663508536 | 4 | 76497359 | 78045637 |
| beer-intake | PS | -0.398691 | -1 | 0.1672 | 0.158954 | 0 | 1 | 0.150976 | 0.554031029 | 4 | 85437806 | 86931670 |
| beer-intake | PS | 0.100694 | -0.79431 | 1 | 0.0101394 | 0 | 1 | 0.772924 | 0.92959111 | 4 | 86931671 | 88502717 |
| beer-intake | PS | 0.0270177 | -0.33365 | 0.39416 | 0.000729956 | 0 | 0.1881 | 0.878945 | 0.964594882 | 4 | 89244555 | 90236971 |
| beer-intake | PS | -0.285423 | -1 | 0.69482 | 0.0814662 | 0 | 1 | 0.462319 | 0.794034035 | 4 | 91309864 | 92219192 |
| beer-intake | PS | -0.177235 | -0.63924 | 0.24083 | 0.0314124 | 0 | 0.41163 | 0.367653 | 0.742122805 | 4 | 99532481 | 100333334 |
| beer-intake | PS | 0.26439 | -0.43776 | 1 | 0.0699021 | 0 | 1 | 0.409865 | 0.767238613 | 4 | 102544804 | 104384534 |
| beer-intake | PS | -0.503029 | -1 | 0.30898 | 0.253038 | 0 | 1 | 0.18432 | 0.58903045 | 4 | 105319196 | 106479155 |
| beer-intake | PS | 0.579317 | -0.0172 | 1 | 0.335608 | 0 | 1 | 0.063164 | 0.417598429 | 4 | 120563074 | 121393008 |
| beer-intake | PS | -0.276806 | -0.68334 | 0.06463 | 0.0766216 | 0 | 0.46695 | 0.104361 | 0.497135592 | 4 | 121981244 | 122655434 |
| beer-intake | PS | 0.186906 | -0.71731 | 1 | 0.0349339 | 0 | 1 | 0.613325 | 0.863169606 | 4 | 125486536 | 126476842 |
| beer-intake | PS | 0.00138434 | -0.66917 | 0.70563 | 0.00000192 | 0 | 0.6799 | 0.996052 | 0.999256787 | 4 | 128321877 | 129625376 |
| beer-intake | PS | 0.442239 | -0.2312 | 1 | 0.195575 | 0 | 1 | 0.179051 | 0.583031472 | 4 | 129625377 | 131098950 |
| beer-intake | PS | 0.994478 | 0.2587 | 1 | 0.988986 | 0.06839 | 1 | 0.0113314 | 0.251698291 | 4 | 134109979 | 135809542 |
| beer-intake | PS | -0.18429 | -1 | 0.81739 | 0.0339628 | 0 | 1 | 0.63688 | 0.873870499 | 4 | 135809543 | 137400031 |
| beer-intake | PS | 0.282648 | -0.42198 | 1 | 0.07989 | 0 | 1 | 0.386895 | 0.751444076 | 4 | 138537345 | 139553760 |
| beer-intake | PS | -0.0206699 | -0.48358 | 0.44604 | 0.000427246 | 0 | 0.3024 | 0.92053 | 0.978662428 | 4 | 141087048 | 142807914 |
| beer-intake | PS | -0.34586 | -1 | 0.29136 | 0.119619 | 0 | 1 | 0.261159 | 0.645985626 | 4 | 146174872 | 147161042 |
| beer-intake | PS | -0.387828 | -1 | 0.08718 | 0.15041 | 0 | 1 | 0.104572 | 0.497135592 | 4 | 149998529 | 151014322 |
| beer-intake | PS | 0.185314 | -0.16708 | 0.56312 | 0.0343413 | 0 | 0.31853 | 0.287636 | 0.674870098 | 4 | 155044410 | 156520288 |
| beer-intake | PS | 0.631109 | 0.08759 | 1 | 0.398299 | 0.0117 | 1 | 0.0236784 | 0.303629549 | 4 | 157597310 | 159176073 |
| beer-intake | PS | 0.410904 | -0.05577 | 1 | 0.168842 | 0 | 1 | 0.0838466 | 0.463097836 | 4 | 170682810 | 171643019 |
| beer-intake | PS | 0.37035 | 0.00332 | 0.84957 | 0.137159 | 0.00189 | 0.72178 | 0.0503052 | 0.375723306 | 4 | 172555991 | 174470206 |
| beer-intake | PS | -0.330541 | -1 | 0.20661 | 0.109257 | 0 | 1 | 0.202307 | 0.602877424 | 4 | 174470207 | 175295842 |
| beer-intake | PS | -0.505156 | -1 | -0.05989 | 0.255183 | 0.00633 | 1 | 0.0299622 | 0.318452682 | 4 | 175959698 | 177129678 |
| beer-intake | PS | -0.183374 | -1 | 0.56597 | 0.0336261 | 0 | 1 | 0.561411 | 0.845152343 | 4 | 178314528 | 179233905 |
| beer-intake | PS | -0.200018 | -0.94549 | 0.40323 | 0.0400072 | 0 | 0.90085 | 0.462998 | 0.794034035 | 4 | 181122434 | 182065646 |
| beer-intake | PS | 0.161517 | -0.36871 | 0.7838 | 0.0260878 | 0 | 0.64044 | 0.517273 | 0.822603387 | 4 | 182065647 | 182946258 |
| beer-intake | PS | -0.249429 | -0.99151 | 0.31702 | 0.0622147 | 0 | 1 | 0.356871 | 0.732977849 | 4 | 182946259 | 183603892 |
| beer-intake | PS | -0.215711 | -0.85397 | 0.30389 | 0.0465312 | 0 | 0.74087 | 0.388096 | 0.753132226 | 4 | 183603893 | 184338584 |
| beer-intake | PS | 0.346037 | 0.05838 | 0.67058 | 0.119742 | 0.00403 | 0.44968 | 0.0204464 | 0.292402657 | 4 | 184338585 | 185483262 |
| beer-intake | PS | 0.191294 | -0.46987 | 1 | 0.0365934 | 0 | 1 | 0.519524 | 0.822603387 | 4 | 189899574 | 191043880 |
| beer-intake | PS | 0.231675 | -0.32767 | 0.99328 | 0.0536732 | 0 | 1 | 0.380645 | 0.747107314 | 5 | 1206610 | 2106885 |
| beer-intake | PS | 0.208724 | -0.76857 | 1 | 0.0435656 | 0 | 1 | 0.596443 | 0.856751476 | 5 | 2106886 | 2960068 |
| beer-intake | PS | -0.162273 | -1 | 0.50459 | 0.0263324 | 0 | 1 | 0.587824 | 0.855475038 | 5 | 6936734 | 8079415 |
| beer-intake | PS | -0.206056 | -0.8886 | 0.34491 | 0.042459 | 0 | 0.79901 | 0.429874 | 0.772599009 | 5 | 8079416 | 9203855 |
| beer-intake | PS | 0.0811504 | -0.32256 | 0.50575 | 0.00658539 | 0 | 0.27487 | 0.676857 | 0.89679545 | 5 | 9203856 | 10549029 |
| beer-intake | PS | 0.407178 | 0.03101 | 0.89575 | 0.165794 | 0.00297 | 0.80237 | 0.0394575 | 0.353063548 | 5 | 10549030 | 11850850 |
| beer-intake | PS | -0.554345 | -1 | -0.02609 | 0.307298 | 0.00421 | 1 | 0.0435936 | 0.360793635 | 5 | 13608148 | 14910295 |
| beer-intake | PS | 0.476661 | -0.34611 | 1 | 0.227206 | 0 | 1 | 0.223734 | 0.620938095 | 5 | 14910296 | 16592319 |
| beer-intake | PS | 0.450277 | -0.10937 | 1 | 0.202749 | 0 | 1 | 0.116355 | 0.516275157 | 5 | 16592320 | 17803477 |
| beer-intake | PS | 0.0503445 | -0.66272 | 0.80766 | 0.00253457 | 0 | 0.82617 | 0.863384 | 0.958085094 | 5 | 18791411 | 20397013 |
| beer-intake | PS | 0.552397 | -0.21338 | 1 | 0.305143 | 0 | 1 | 0.148118 | 0.550971968 | 5 | 22149043 | 23246745 |
| beer-intake | PS | NA | NA | NA | NA | NA | NA | NA | NA | 5 | 35157147 | 36431967 |
| beer-intake | PS | 0.652724 | -0.01022 | 1 | 0.426048 | 0 | 1 | 0.05937 | 0.406350706 | 5 | 36431968 | 37925487 |
| beer-intake | PS | 0.462001 | -0.01387 | 1 | 0.213445 | 0 | 1 | 0.062253 | 0.414462038 | 5 | 37925488 | 39438985 |
| beer-intake | PS | -0.0954156 | -0.65855 | 0.42918 | 0.00910413 | 0 | 0.47436 | 0.695519 | 0.903592034 | 5 | 40290852 | 41279590 |
| beer-intake | PS | -0.45192 | -1 | 0.20976 | 0.204231 | 0 | 1 | 0.165421 | 0.577743536 | 5 | 41279591 | 42856332 |
| beer-intake | PS | -0.23171 | -1 | 0.51005 | 0.0536896 | 0 | 1 | 0.472477 | 0.797472807 | 5 | 44049879 | 45305566 |
| beer-intake | PS | 0.113071 | -0.61705 | 1 | 0.012785 | 0 | 1 | 0.720848 | 0.909187567 | 5 | 52837226 | 53747856 |
| beer-intake | PS | -0.806858 | -1 | -0.29486 | 0.65102 | 0.08694 | 1 | 0.00277899 | 0.167260767 | 5 | 55221399 | 55968966 |
| beer-intake | PS | 0.703304 | 0.24104 | 1 | 0.494637 | 0.0582 | 1 | 0.00440923 | 0.180249734 | 5 | 58721459 | 59868567 |
| beer-intake | PS | -0.0307152 | -0.67205 | 0.59597 | 0.000943422 | 0 | 0.63293 | 0.90471 | 0.975080055 | 5 | 60930754 | 62180368 |
| beer-intake | PS | 0.157855 | -0.37879 | 0.76702 | 0.0249181 | 0 | 0.60329 | 0.524654 | 0.826587751 | 5 | 62180369 | 63214089 |
| beer-intake | PS | 0.393172 | -0.20345 | 1 | 0.154584 | 0 | 1 | 0.175449 | 0.582296617 | 5 | 65606871 | 67096191 |
| beer-intake | PS | -0.326922 | -1 | 0.40518 | 0.106878 | 0 | 1 | 0.342707 | 0.71676685 | 5 | 67096192 | 68006993 |
| beer-intake | PS | 0.182239 | -0.39004 | 0.92362 | 0.033211 | 0 | 0.89213 | 0.495682 | 0.811042493 | 5 | 71468652 | 73314061 |
| beer-intake | PS | 0.0223355 | -0.32605 | 0.37723 | 0.000498873 | 0 | 0.17086 | 0.895393 | 0.971785522 | 5 | 75959516 | 77290255 |
| beer-intake | PS | -0.169825 | -0.68925 | 0.28528 | 0.0288406 | 0 | 0.48436 | 0.439725 | 0.779241373 | 5 | 82720249 | 84094797 |
| beer-intake | PS | -0.116922 | -1 | 0.65691 | 0.0136707 | 0 | 1 | 0.716728 | 0.906613519 | 5 | 86493764 | 87943482 |
| beer-intake | PS | 0.0747064 | -0.39697 | 0.56811 | 0.00558104 | 0 | 0.35659 | 0.735982 | 0.917848257 | 5 | 87943483 | 89584466 |
| beer-intake | PS | -1 | -1 | -0.18191 | 1 | 0.04183 | 1 | 0.0147819 | 0.271222952 | 5 | 90793805 | 91956905 |
| beer-intake | PS | -0.1889 | -0.89989 | 0.38136 | 0.0356833 | 0 | 0.83886 | 0.474927 | 0.799542053 | 5 | 91956906 | 93814604 |
| beer-intake | PS | -0.301925 | -1 | 0.68873 | 0.0911586 | 0 | 1 | 0.465298 | 0.795405161 | 5 | 117348498 | 118605251 |
| beer-intake | PS | -0.204632 | -0.66648 | 0.2121 | 0.0418741 | 0 | 0.44543 | 0.3074 | 0.6899425 | 5 | 123191942 | 124109485 |
| beer-intake | PS | 0.333937 | -0.19657 | 1 | 0.111514 | 0 | 1 | 0.204128 | 0.603878667 | 5 | 125131721 | 126054697 |
| beer-intake | PS | -0.0188007 | -0.71762 | 0.65317 | 0.000353465 | 0 | 0.74943 | 0.948236 | 0.98795147 | 5 | 128067415 | 128734905 |
| beer-intake | PS | 0.452499 | 0.03272 | 1 | 0.204756 | 0.00405 | 1 | 0.039051 | 0.352687624 | 5 | 128734906 | 130573817 |
| beer-intake | PS | 0.26 | -0.08552 | 0.70658 | 0.0675997 | 0 | 0.49926 | 0.136082 | 0.540048903 | 5 | 130573818 | 132554690 |
| beer-intake | PS | 0.406218 | -0.0981 | 1 | 0.165013 | 0 | 1 | 0.108619 | 0.507510235 | 5 | 132554691 | 134556570 |
| beer-intake | PS | 0.221588 | -0.38732 | 1 | 0.0491012 | 0 | 1 | 0.43208 | 0.772822169 | 5 | 135344944 | 136949853 |
| beer-intake | PS | -0.52166 | -1 | -0.17832 | 0.272129 | 0.03187 | 1 | 0.00491544 | 0.192027888 | 5 | 141253831 | 142532956 |
| beer-intake | PS | 0.124681 | -0.74663 | 1 | 0.0155454 | 0 | 1 | 0.719964 | 0.908578989 | 5 | 143605909 | 145319096 |
| beer-intake | PS | -0.337931 | -0.97563 | 0.1224 | 0.114198 | 0 | 0.95186 | 0.149478 | 0.55216732 | 5 | 148662215 | 149850203 |
| beer-intake | PS | 0.0727328 | -0.29273 | 0.49509 | 0.00529006 | 0 | 0.27288 | 0.667452 | 0.894133811 | 5 | 149850204 | 150981934 |
| beer-intake | PS | 0.628892 | -0.01262 | 1 | 0.395505 | 0 | 1 | 0.0527426 | 0.38279407 | 5 | 152878628 | 153734494 |
| beer-intake | PS | -0.432209 | -1 | 0.14764 | 0.186805 | 0 | 1 | 0.144919 | 0.545911712 | 5 | 153734495 | 154599750 |
| beer-intake | PS | 0.0260895 | -0.52227 | 0.58909 | 0.000680664 | 0 | 0.5145 | 0.908137 | 0.97602352 | 5 | 156345452 | 157191081 |
| beer-intake | PS | 0.00966294 | -0.30297 | 0.32256 | 0.0000934 | 0 | 0.13202 | 0.947759 | 0.98795147 | 5 | 157191082 | 158484775 |
| beer-intake | PS | 0.283541 | -0.26803 | 1 | 0.0803953 | 0 | 1 | 0.272452 | 0.656699802 | 5 | 159663734 | 160519049 |
| beer-intake | PS | -0.32648 | -0.90883 | 0.11389 | 0.106589 | 0 | 0.82598 | 0.138812 | 0.541002377 | 5 | 162386028 | 163781268 |
| beer-intake | PS | -0.360914 | -0.99892 | 0.05264 | 0.130259 | 0 | 0.99785 | 0.0878401 | 0.474976435 | 5 | 165289212 | 166863413 |
| beer-intake | PS | -0.381866 | -1 | 0.07453 | 0.145821 | 0 | 1 | 0.0928337 | 0.481261689 | 5 | 166863414 | 168342743 |
| beer-intake | PS | 0.0176357 | -0.91641 | 0.95951 | 0.000311 | 0 | 1 | 0.95808 | 0.990362823 | 5 | 168342744 | 169506966 |
| beer-intake | PS | 0.0367763 | -0.39978 | 0.49287 | 0.0013525 | 0 | 0.27931 | 0.857088 | 0.955614217 | 5 | 169506967 | 170898340 |
| beer-intake | PS | -0.00155928 | -0.36168 | 0.36466 | 0.00000243 | 0 | 0.17489 | 0.992933 | 0.998435708 | 5 | 173606996 | 174662885 |
| beer-intake | PS | 0.100175 | -0.84868 | 1 | 0.0100351 | 0 | 1 | 0.782942 | 0.932406685 | 5 | 174662886 | 176180301 |
| beer-intake | PS | -0.446582 | -1 | 0.05945 | 0.199435 | 0 | 1 | 0.079734 | 0.4584705 | 5 | 178595253 | 179794710 |
| beer-intake | PS | 0.335898 | -0.00428 | 0.74886 | 0.112827 | 0 | 0.56079 | 0.0505543 | 0.375723306 | 6 | 63979 | 1380679 |
| beer-intake | PS | 0.186232 | -0.2235 | 0.66896 | 0.0346822 | 0 | 0.44933 | 0.339828 | 0.716512749 | 6 | 1380680 | 2746531 |
| beer-intake | PS | -0.332347 | -0.9861 | 0.1678 | 0.110455 | 0 | 0.97239 | 0.171269 | 0.582296617 | 6 | 2746532 | 3964072 |
| beer-intake | PS | -0.219294 | -1 | 0.4173 | 0.0480896 | 0 | 1 | 0.459371 | 0.792607357 | 6 | 5378214 | 6621937 |
| beer-intake | PS | -0.412786 | -1 | 0.28575 | 0.170392 | 0 | 1 | 0.217154 | 0.615142653 | 6 | 10416551 | 11790671 |
| beer-intake | PS | 0.135073 | -0.29599 | 0.61497 | 0.0182447 | 0 | 0.39039 | 0.525735 | 0.826888961 | 6 | 11790672 | 13352326 |
| beer-intake | PS | 0.101773 | -0.2923 | 0.52035 | 0.0103577 | 0 | 0.27699 | 0.590908 | 0.855475038 | 6 | 13352327 | 15069421 |
| beer-intake | PS | 0.418559 | -0.06652 | 1 | 0.175191 | 0 | 1 | 0.0925505 | 0.480556332 | 6 | 15069422 | 16566882 |
| beer-intake | PS | 0.502182 | -0.06131 | 1 | 0.252187 | 0 | 1 | 0.0784701 | 0.457283004 | 6 | 16566883 | 17391994 |
| beer-intake | PS | 0.245588 | -0.1392 | 0.68846 | 0.0603135 | 0 | 0.47767 | 0.203504 | 0.60356984 | 6 | 19449153 | 20418020 |
| beer-intake | PS | 0.585143 | 0.27407 | 0.96246 | 0.342392 | 0.07512 | 0.92633 | 0.000408335 | 0.064213759 | 6 | 20418021 | 21295864 |
| beer-intake | PS | -0.309238 | -0.59954 | -0.05289 | 0.0956279 | 0.00339 | 0.35945 | 0.0213975 | 0.292402657 | 6 | 21295865 | 22199713 |
| beer-intake | PS | -0.193829 | -0.50862 | 0.08955 | 0.0375697 | 0 | 0.2587 | 0.184539 | 0.58904054 | 6 | 23192338 | 23939306 |
| beer-intake | PS | 0.169505 | -0.09415 | 0.45732 | 0.0287318 | 0 | 0.20914 | 0.198979 | 0.602877424 | 6 | 23939307 | 24950379 |
| beer-intake | PS | 0.129012 | -0.18365 | 0.5056 | 0.0166441 | 0 | 0.25773 | 0.391057 | 0.754395872 | 6 | 24950380 | 25684629 |
| beer-intake | PS | -0.0263386 | -0.34433 | 0.28912 | 0.00069372 | 0 | 0.14286 | 0.856266 | 0.955614217 | 6 | 25684630 | 26396200 |
| beer-intake | PS | 0.158564 | -0.30319 | 0.81411 | 0.0251424 | 0 | 0.68695 | 0.449922 | 0.7857996 | 6 | 26396201 | 27261035 |
| beer-intake | PS | 0.0859806 | -0.34207 | 0.64653 | 0.00739266 | 0 | 0.48098 | 0.649998 | 0.883802443 | 6 | 27261036 | 28666364 |
| beer-intake | PS | 0.155918 | -0.26403 | 0.73874 | 0.0243105 | 0 | 0.55821 | 0.41822 | 0.767893591 | 6 | 30070718 | 30715006 |
| beer-intake | PS | -0.201349 | -0.95187 | 0.32783 | 0.0405415 | 0 | 0.94438 | 0.408956 | 0.766733809 | 6 | 31106494 | 31250556 |
| beer-intake | PS | 0.0384803 | -0.61448 | 0.71234 | 0.00148073 | 0 | 0.71337 | 0.888235 | 0.969577376 | 6 | 31250557 | 31320268 |
| beer-intake | PS | -0.0198064 | -0.48554 | 0.43436 | 0.000392292 | 0 | 0.31543 | 0.919886 | 0.978614878 | 6 | 32208902 | 32454577 |
| beer-intake | PS | 0.326288 | -0.05216 | 0.97565 | 0.106464 | 0 | 0.95189 | 0.0921751 | 0.480133774 | 6 | 32682214 | 32897998 |
| beer-intake | PS | 0.067408 | -0.30014 | 0.49029 | 0.00454383 | 0 | 0.26887 | 0.681652 | 0.89947302 | 6 | 32897999 | 33194975 |
| beer-intake | PS | 0.0313387 | -0.40833 | 0.50026 | 0.000982112 | 0 | 0.34427 | 0.86559 | 0.958635788 | 6 | 33194976 | 33864262 |
| beer-intake | PS | -0.194292 | -0.48264 | 0.05161 | 0.0377492 | 0 | 0.23294 | 0.119857 | 0.518850788 | 6 | 33864263 | 34979270 |
| beer-intake | PS | 0.120866 | -0.27869 | 0.57049 | 0.0146086 | 0 | 0.33005 | 0.517579 | 0.822603387 | 6 | 34979271 | 36346353 |
| beer-intake | PS | 0.1039 | -0.3587 | 0.65606 | 0.0107952 | 0 | 0.47943 | 0.613416 | 0.863169606 | 6 | 36346354 | 37570051 |
| beer-intake | PS | 0.0487753 | -0.36967 | 0.47232 | 0.00237903 | 0 | 0.26021 | 0.797214 | 0.940138903 | 6 | 37570052 | 38688720 |
| beer-intake | PS | 0.362755 | 0.00836 | 0.7829 | 0.131591 | 0.00174 | 0.61294 | 0.0490064 | 0.373576347 | 6 | 38688721 | 39785907 |
| beer-intake | PS | 0.395277 | -0.0962 | 1 | 0.156244 | 0 | 1 | 0.111085 | 0.50893337 | 6 | 40778402 | 42103738 |
| beer-intake | PS | 0.129299 | -0.84229 | 1 | 0.0167181 | 0 | 1 | 0.727064 | 0.91330424 | 6 | 42103739 | 43770626 |
| beer-intake | PS | -0.135753 | -0.52936 | 0.22842 | 0.0184288 | 0 | 0.28125 | 0.449246 | 0.7857996 | 6 | 43770627 | 44596897 |
| beer-intake | PS | -0.233242 | -1 | 0.2668 | 0.0544018 | 0 | 1 | 0.341091 | 0.716609936 | 6 | 45408422 | 46430701 |
| beer-intake | PS | 0.0718277 | -0.34932 | 0.5174 | 0.00515922 | 0 | 0.28983 | 0.725811 | 0.912492492 | 6 | 46430702 | 47313443 |
| beer-intake | PS | 0.0245441 | -0.66758 | 0.72524 | 0.000602412 | 0 | 0.78506 | 0.929101 | 0.980691399 | 6 | 51826424 | 52598879 |
| beer-intake | PS | -0.259746 | -1 | 0.38741 | 0.0674682 | 0 | 1 | 0.392969 | 0.754486297 | 6 | 52598880 | 53425492 |
| beer-intake | PS | 0.0324911 | -0.32896 | 0.40811 | 0.00105567 | 0 | 0.18694 | 0.855854 | 0.955614217 | 6 | 53425493 | 54452767 |
| beer-intake | PS | -0.106325 | -0.74975 | 0.47426 | 0.011305 | 0 | 0.62311 | 0.690151 | 0.900892552 | 6 | 54452768 | 55469137 |
| beer-intake | PS | -0.0231016 | -0.77927 | 0.69286 | 0.000533685 | 0 | 0.87924 | 0.938191 | 0.983985808 | 6 | 57316158 | 58141889 |
| beer-intake | PS | 0.0829016 | -0.63767 | 0.90389 | 0.00687268 | 0 | 0.97395 | 0.77941 | 0.930897141 | 6 | 61883561 | 62693128 |
| beer-intake | PS | -0.0325272 | -0.77862 | 0.68066 | 0.00105802 | 0 | 0.79291 | 0.91172 | 0.977166335 | 6 | 73170169 | 74401506 |
| beer-intake | PS | 0.201231 | -0.507 | 1 | 0.040494 | 0 | 1 | 0.519084 | 0.822603387 | 6 | 79859904 | 80693927 |
| beer-intake | PS | 0.140229 | -0.50137 | 0.87258 | 0.0196641 | 0 | 0.86748 | 0.624679 | 0.868930667 | 6 | 82388205 | 83571953 |
| beer-intake | PS | 0.125045 | -0.62117 | 1 | 0.0156362 | 0 | 1 | 0.690508 | 0.900998453 | 6 | 86818670 | 87516322 |
| beer-intake | PS | -0.27212 | -0.99909 | 0.28048 | 0.0740491 | 0 | 1 | 0.292039 | 0.67501725 | 6 | 88499746 | 89974267 |
| beer-intake | PS | 0.0800782 | -0.45554 | 0.64154 | 0.00641252 | 0 | 0.45158 | 0.737739 | 0.917849189 | 6 | 91097025 | 92015279 |
| beer-intake | PS | 0.108777 | -0.61392 | 0.94866 | 0.0118324 | 0 | 1 | 0.721003 | 0.909187567 | 6 | 95176338 | 96480153 |
| beer-intake | PS | 0.829891 | 0.04896 | 1 | 0.688719 | 0.01293 | 1 | 0.0441834 | 0.360793635 | 6 | 96480154 | 98173003 |
| beer-intake | PS | -0.383219 | -0.82211 | -0.03587 | 0.146857 | 0.00305 | 0.67586 | 0.037946 | 0.351281893 | 6 | 98173004 | 99678876 |
| beer-intake | PS | 0.547382 | 0.0203 | 1 | 0.299627 | 0.00478 | 1 | 0.04889 | 0.373576347 | 6 | 100878646 | 101793542 |
| beer-intake | PS | 0.412687 | -0.03973 | 1 | 0.17 | 0 | 1 | 0.0752273 | 0.451640371 | 6 | 101793543 | 102637706 |
| beer-intake | PS | -0.00665236 | -0.38146 | 0.36249 | 0.0000443 | 0 | 0.19323 | 0.970501 | 0.993719113 | 6 | 104951345 | 106053915 |
| beer-intake | PS | -0.102302 | -0.31462 | 0.10438 | 0.0105 | 0 | 0.09914 | 0.329898 | 0.708846624 | 6 | 106053916 | 107309327 |
| beer-intake | PS | -0.0142027 | -0.74153 | 0.69728 | 0.000201716 | 0 | 0.81622 | 0.961151 | 0.991317435 | 6 | 107309328 | 109043244 |
| beer-intake | PS | 0.0890306 | -0.44562 | 0.68736 | 0.00792646 | 0 | 0.51592 | 0.709636 | 0.906057359 | 6 | 109043245 | 110647842 |
| beer-intake | PS | 0.0447167 | -0.50781 | 0.63023 | 0.00199958 | 0 | 0.48988 | 0.857595 | 0.955614217 | 6 | 110647843 | 111363443 |
| beer-intake | PS | 0.0400108 | -0.52702 | 0.66286 | 0.00160086 | 0 | 0.53428 | 0.8759 | 0.963195084 | 6 | 112342874 | 113705003 |
| beer-intake | PS | -0.7198 | -1 | -0.07916 | 0.518112 | 0.01371 | 1 | 0.0305737 | 0.318452682 | 6 | 113705004 | 115062811 |
| beer-intake | PS | 0.14572 | -0.43834 | 0.85472 | 0.0212343 | 0 | 0.77142 | 0.586127 | 0.855475038 | 6 | 123854858 | 125365054 |
| beer-intake | PS | 0.488914 | -0.13526 | 1 | 0.239036 | 0 | 1 | 0.114513 | 0.515861321 | 6 | 125365055 | 127545459 |
| beer-intake | PS | 0.490543 | -0.14398 | 1 | 0.240632 | 0 | 1 | 0.11978 | 0.518850788 | 6 | 129850179 | 130550137 |
| beer-intake | PS | -0.278515 | -1 | 0.34958 | 0.0775705 | 0 | 1 | 0.346392 | 0.721042876 | 6 | 130550138 | 131457164 |
| beer-intake | PS | -0.332941 | -1 | 0.28537 | 0.11085 | 0 | 1 | 0.266451 | 0.651484007 | 6 | 132890695 | 134313643 |
| beer-intake | PS | 0.347584 | -0.06233 | 0.91987 | 0.120815 | 0 | 0.84616 | 0.103002 | 0.496571285 | 6 | 135544084 | 137553212 |
| beer-intake | PS | 0.204334 | 0.00264 | 0.41293 | 0.0417522 | 0.00057 | 0.17051 | 0.0498599 | 0.375579465 | 6 | 137553213 | 138825721 |
| beer-intake | PS | 0.31784 | -0.2206 | 1 | 0.101022 | 0 | 1 | 0.22724 | 0.620938095 | 6 | 138825722 | 139716713 |
| beer-intake | PS | 0.0137479 | -0.52234 | 0.55195 | 0.000189005 | 0 | 0.41709 | 0.954462 | 0.988982516 | 6 | 139716714 | 141449453 |
| beer-intake | PS | -0.355183 | -1 | 0.2828 | 0.126155 | 0 | 1 | 0.242268 | 0.633303528 | 6 | 143083348 | 144791455 |
| beer-intake | PS | -0.254241 | -1 | 0.76058 | 0.0646383 | 0 | 1 | 0.546942 | 0.841806113 | 6 | 145778283 | 147015882 |
| beer-intake | PS | 0.505926 | 0.06743 | 1 | 0.255961 | 0.00758 | 1 | 0.0237619 | 0.303629549 | 6 | 151629955 | 152376499 |
| beer-intake | PS | 0.0834103 | -0.50316 | 0.71777 | 0.00695728 | 0 | 0.57518 | 0.747288 | 0.922169351 | 6 | 152376500 | 153082361 |
| beer-intake | PS | 0.408527 | -0.00937 | 0.97829 | 0.166894 | 0 | 0.95706 | 0.0533041 | 0.384307264 | 6 | 154462011 | 155523957 |
| beer-intake | PS | -0.151414 | -0.49846 | 0.17823 | 0.0229263 | 0 | 0.24862 | 0.365259 | 0.739445468 | 6 | 155523958 | 156762740 |
| beer-intake | PS | -0.247135 | -0.79063 | 0.19865 | 0.0610758 | 0 | 0.62562 | 0.25293 | 0.640696318 | 6 | 156762741 | 158220143 |
| beer-intake | PS | -0.102035 | -0.83674 | 0.50713 | 0.0104111 | 0 | 0.80163 | 0.703874 | 0.904676873 | 6 | 161371015 | 162254229 |
| beer-intake | PS | 0.100318 | -0.71066 | 1 | 0.0100637 | 0 | 1 | 0.761552 | 0.927032736 | 6 | 163336362 | 164687462 |
| beer-intake | PS | -0.261942 | -1 | 0.40208 | 0.0686138 | 0 | 1 | 0.392699 | 0.754486297 | 6 | 164687463 | 165835953 |
| beer-intake | PS | 0.202855 | -0.22652 | 0.71024 | 0.0412 | 0 | 0.50636 | 0.338711 | 0.715080883 | 6 | 165835954 | 166853325 |
| beer-intake | PS | -0.166177 | -1 | 0.50762 | 0.0276147 | 0 | 1 | 0.580794 | 0.85428452 | 6 | 166853326 | 167714865 |
| beer-intake | PS | -0.00256979 | -1 | 1 | 0.0000066 | 0 | 1 | 0.994603 | 0.999256787 | 7 | 617320 | 1366972 |
| beer-intake | PS | -0.0778747 | -0.2932 | 0.12428 | 0.00606447 | 0 | 0.08768 | 0.432414 | 0.772996236 | 7 | 4938443 | 6020653 |
| beer-intake | PS | -0.225459 | -0.97275 | 0.30099 | 0.0508319 | 0 | 0.97575 | 0.345284 | 0.719653825 | 7 | 6716906 | 7167610 |
| beer-intake | PS | 0.279563 | -0.29031 | 1 | 0.0781557 | 0 | 1 | 0.30152 | 0.685769025 | 7 | 9225107 | 9900801 |
| beer-intake | PS | -0.455543 | -1 | 0.01212 | 0.207519 | 0 | 1 | 0.0604189 | 0.407637204 | 7 | 9900802 | 10481677 |
| beer-intake | PS | 0.237943 | -0.63737 | 1 | 0.0566168 | 0 | 1 | 0.530238 | 0.830180876 | 7 | 11232448 | 11855413 |
| beer-intake | PS | 0.215192 | -0.28994 | 0.81552 | 0.0463074 | 0 | 0.67105 | 0.375817 | 0.744326334 | 7 | 15877565 | 16739013 |
| beer-intake | PS | 0.232023 | -0.07535 | 0.5689 | 0.0538348 | 0 | 0.32364 | 0.136766 | 0.540048903 | 7 | 16739014 | 17596578 |
| beer-intake | PS | -0.00994674 | -0.42885 | 0.41781 | 0.0000989 | 0 | 0.24561 | 0.960254 | 0.991317435 | 7 | 28890887 | 30175113 |
| beer-intake | PS | 0.480443 | -0.13805 | 1 | 0.230826 | 0 | 1 | 0.126454 | 0.530165294 | 7 | 30175114 | 31730554 |
| beer-intake | PS | -0.206353 | -0.77683 | 0.28031 | 0.0425817 | 0 | 0.60712 | 0.376225 | 0.744326334 | 7 | 38966484 | 40261240 |
| beer-intake | PS | -0.0984171 | -0.46735 | 0.24835 | 0.00968592 | 0 | 0.22102 | 0.567281 | 0.84703292 | 7 | 40261241 | 41415925 |
| beer-intake | PS | 0.0707119 | -0.47668 | 0.63747 | 0.00500017 | 0 | 0.47437 | 0.771388 | 0.92959111 | 7 | 43448816 | 44989571 |
| beer-intake | PS | 0.469452 | -0.31791 | 1 | 0.220385 | 0 | 1 | 0.224188 | 0.620938095 | 7 | 44989572 | 46247335 |
| beer-intake | PS | -0.0396125 | -0.44155 | 0.37695 | 0.00156915 | 0 | 0.23004 | 0.836689 | 0.948975213 | 7 | 49632427 | 50894508 |
| beer-intake | PS | 0.140656 | -0.33857 | 0.67404 | 0.0197842 | 0 | 0.47334 | 0.534964 | 0.833763143 | 7 | 50894509 | 51951647 |
| beer-intake | PS | 0.329243 | -0.18192 | 1 | 0.108401 | 0 | 1 | 0.193832 | 0.59918586 | 7 | 55161395 | 56303513 |
| beer-intake | PS | 0.646649 | 0.12964 | 1 | 0.418155 | 0.01979 | 1 | 0.0146549 | 0.271222952 | 7 | 67474723 | 68569224 |
| beer-intake | PS | -0.287601 | -0.80042 | 0.14239 | 0.0827142 | 0 | 0.64318 | 0.179004 | 0.583031472 | 7 | 68569225 | 70144614 |
| beer-intake | PS | 0.70268 | 0.16253 | 1 | 0.49376 | 0.02769 | 1 | 0.0128707 | 0.26371942 | 7 | 70144615 | 71215741 |
| beer-intake | PS | -0.247588 | -0.78715 | 0.21526 | 0.0612996 | 0 | 0.62122 | 0.262783 | 0.647735304 | 7 | 75243900 | 76451928 |
| beer-intake | PS | 0.209991 | -0.1628 | 0.63194 | 0.0440963 | 0 | 0.3994 | 0.261282 | 0.645985626 | 7 | 77663965 | 78685009 |
| beer-intake | PS | -0.0799555 | -0.75239 | 0.54279 | 0.00639288 | 0 | 0.71744 | 0.761001 | 0.926707407 | 7 | 80055722 | 81533566 |
| beer-intake | PS | 0.208848 | -0.34176 | 0.88238 | 0.0436175 | 0 | 0.79604 | 0.42039 | 0.767893591 | 7 | 81533567 | 82759283 |
| beer-intake | PS | 0.0617821 | -0.50017 | 0.73061 | 0.00381702 | 0 | 0.66944 | 0.798904 | 0.940238575 | 7 | 92530166 | 93691725 |
| beer-intake | PS | -0.171969 | -1 | 1 | 0.0295734 | 0 | 1 | 0.704926 | 0.904676873 | 7 | 95174848 | 96564981 |
| beer-intake | PS | -0.290657 | -1 | 0.22157 | 0.0844816 | 0 | 1 | 0.248681 | 0.637715318 | 7 | 97420208 | 98173564 |
| beer-intake | PS | -0.440647 | -1 | 0.36665 | 0.19417 | 0 | 1 | 0.245977 | 0.636706959 | 7 | 98173565 | 99465540 |
| beer-intake | PS | 0.196808 | -0.54169 | 1 | 0.0387333 | 0 | 1 | 0.550928 | 0.843473948 | 7 | 100849308 | 101950748 |
| beer-intake | PS | 0.163682 | -0.48365 | 0.94965 | 0.0267918 | 0 | 0.95729 | 0.567455 | 0.84703292 | 7 | 109095559 | 110479479 |
| beer-intake | PS | -0.124087 | -0.8696 | 0.49535 | 0.0153976 | 0 | 0.84199 | 0.647939 | 0.882104533 | 7 | 113339387 | 115321301 |
| beer-intake | PS | 0.0486207 | -0.54944 | 0.69895 | 0.00236397 | 0 | 0.60895 | 0.851252 | 0.955373322 | 7 | 115321302 | 116835336 |
| beer-intake | PS | -0.133795 | -0.45539 | 0.16198 | 0.0179011 | 0 | 0.20877 | 0.349948 | 0.725669948 | 7 | 125389587 | 126640872 |
| beer-intake | PS | -0.734285 | -1 | -0.23793 | 0.539175 | 0.05732 | 1 | 0.0050334 | 0.192027888 | 7 | 127903739 | 128779173 |
| beer-intake | PS | -0.293196 | -0.78107 | 0.12384 | 0.0859636 | 0 | 0.61008 | 0.151273 | 0.554077632 | 7 | 128779174 | 130418704 |
| beer-intake | PS | 0.31719 | -0.47514 | 1 | 0.100609 | 0 | 1 | 0.357873 | 0.733165841 | 7 | 130418705 | 131856481 |
| beer-intake | PS | -0.0626117 | -0.73157 | 0.58104 | 0.00392022 | 0 | 0.6756 | 0.820774 | 0.944542385 | 7 | 133807217 | 134943221 |
| beer-intake | PS | 0.100051 | -0.275 | 0.49518 | 0.0100102 | 0 | 0.25312 | 0.582963 | 0.855326666 | 7 | 134943222 | 136113467 |
| beer-intake | PS | -0.275419 | -0.61953 | 0.02831 | 0.0758556 | 0 | 0.38382 | 0.0830491 | 0.462902545 | 7 | 138755108 | 140217630 |
| beer-intake | PS | 0.0726145 | -0.74952 | 1 | 0.00527287 | 0 | 1 | 0.823233 | 0.944550594 | 7 | 140217631 | 142098979 |
| beer-intake | PS | 0.439211 | -0.3654 | 1 | 0.192906 | 0 | 1 | 0.247368 | 0.637199691 | 7 | 142098980 | 144324464 |
| beer-intake | PS | -0.203318 | -0.80638 | 0.2978 | 0.0413381 | 0 | 0.66184 | 0.395003 | 0.755963245 | 7 | 152253295 | 153241228 |
| beer-intake | PS | 0.293854 | -0.16211 | 0.96194 | 0.0863503 | 0 | 0.92979 | 0.192807 | 0.5974456 | 7 | 154407488 | 155280610 |
| beer-intake | PS | -0.250809 | -1 | 0.55446 | 0.0629054 | 0 | 1 | 0.465095 | 0.795405161 | 8 | 2970492 | 3386667 |
| beer-intake | PS | 0.1744 | -0.90032 | 1 | 0.0304153 | 0 | 1 | 0.666324 | 0.893527746 | 8 | 3787249 | 4273083 |
| beer-intake | PS | -0.128381 | -0.62119 | 0.33978 | 0.0164818 | 0 | 0.40239 | 0.550921 | 0.843473948 | 8 | 4273084 | 4893120 |
| beer-intake | PS | 0.513247 | 0.0296 | 1 | 0.263423 | 0.00477 | 1 | 0.0407782 | 0.357174253 | 8 | 6019164 | 6663427 |
| beer-intake | PS | -0.226442 | -1 | 0.58878 | 0.0512758 | 0 | 1 | 0.527146 | 0.826925474 | 8 | 21650454 | 22895018 |
| beer-intake | PS | -0.0903017 | -0.92041 | 0.67088 | 0.00815439 | 0 | 1 | 0.771536 | 0.92959111 | 8 | 22895019 | 23788494 |
| beer-intake | PS | 0.0553896 | -0.61966 | 0.74116 | 0.00306801 | 0 | 0.68748 | 0.841415 | 0.949828187 | 8 | 23788495 | 24863243 |
| beer-intake | PS | 0.377107 | -0.00144 | 0.84958 | 0.14221 | 0 | 0.72179 | 0.0501133 | 0.375723306 | 8 | 24863244 | 25859277 |
| beer-intake | PS | -0.388619 | -1 | 0.21707 | 0.151025 | 0 | 1 | 0.192294 | 0.596973934 | 8 | 25859278 | 26679135 |
| beer-intake | PS | 0.42592 | 0.02353 | 0.95767 | 0.181408 | 0.00316 | 0.91835 | 0.0382742 | 0.351728073 | 8 | 27406512 | 28344176 |
| beer-intake | PS | 0.174213 | -0.56098 | 1 | 0.0303503 | 0 | 1 | 0.58779 | 0.855475038 | 8 | 54119374 | 55275354 |
| beer-intake | PS | 0.657983 | -0.26311 | 1 | 0.432941 | 0 | 1 | 0.147972 | 0.550971968 | 8 | 58675118 | 59555977 |
| beer-intake | PS | -0.249918 | -1 | 0.3155 | 0.0624592 | 0 | 1 | 0.351309 | 0.726720141 | 8 | 59555978 | 60476248 |
| beer-intake | PS | 0.545845 | 0.04493 | 1 | 0.297947 | 0.00676 | 1 | 0.0337767 | 0.335303046 | 8 | 60476249 | 61324889 |
| beer-intake | PS | -0.0643072 | -0.42712 | 0.28059 | 0.00413542 | 0 | 0.19624 | 0.705156 | 0.904676873 | 8 | 61324890 | 62330900 |
| beer-intake | PS | -0.351784 | -1 | 0.22367 | 0.123752 | 0 | 1 | 0.208812 | 0.606076286 | 8 | 63253463 | 64215358 |
| beer-intake | PS | 0.0619696 | -0.34031 | 0.48025 | 0.00384024 | 0 | 0.25257 | 0.748007 | 0.922342547 | 8 | 70004666 | 70872088 |
| beer-intake | PS | -0.442817 | -1 | 0.1743 | 0.196087 | 0 | 1 | 0.158206 | 0.568427718 | 8 | 70872089 | 72013184 |
| beer-intake | PS | -0.0451184 | -0.36887 | 0.28028 | 0.00203567 | 0 | 0.14814 | 0.773847 | 0.929869132 | 8 | 72013185 | 72917489 |
| beer-intake | PS | 0.698069 | 0.07059 | 1 | 0.4873 | 0.01247 | 1 | 0.0313112 | 0.323615124 | 8 | 75011700 | 76295483 |
| beer-intake | PS | -0.0691757 | -0.45082 | 0.31452 | 0.00478528 | 0 | 0.21661 | 0.708911 | 0.906057359 | 8 | 77377990 | 78633659 |
| beer-intake | PS | 0.378857 | -0.2027 | 1 | 0.143533 | 0 | 1 | 0.184178 | 0.58903045 | 8 | 92876621 | 94999066 |
| beer-intake | PS | 0.567089 | 0.0028 | 1 | 0.32159 | 0.00478 | 1 | 0.0553894 | 0.392998276 | 8 | 96175631 | 96900513 |
| beer-intake | PS | 0.133423 | -0.42216 | 0.84658 | 0.0178016 | 0 | 0.79736 | 0.609296 | 0.861631208 | 8 | 96900514 | 98132519 |
| beer-intake | PS | -0.490792 | -1 | -0.00157 | 0.240877 | 0.00322 | 1 | 0.0524673 | 0.381644102 | 8 | 101448440 | 102548680 |
| beer-intake | PS | 0.358232 | -0.13194 | 1 | 0.12833 | 0 | 1 | 0.141041 | 0.544641084 | 8 | 102548681 | 103716053 |
| beer-intake | PS | -0.452155 | -1 | 0.14146 | 0.204444 | 0 | 1 | 0.116831 | 0.516275157 | 8 | 103716054 | 104467845 |
| beer-intake | PS | 0.306383 | -0.30441 | 1 | 0.0938704 | 0 | 1 | 0.291104 | 0.67501725 | 8 | 106500951 | 107787163 |
| beer-intake | PS | 0.00759484 | -0.48219 | 0.51165 | 0.0000577 | 0 | 0.33289 | 0.972921 | 0.994031669 | 8 | 121554391 | 122622804 |
| beer-intake | PS | 0.151428 | -0.32237 | 0.70559 | 0.0229303 | 0 | 0.51716 | 0.512634 | 0.822603387 | 8 | 125453323 | 126766827 |
| beer-intake | PS | 0.0206278 | -0.57631 | 0.65099 | 0.000425508 | 0 | 0.54808 | 0.9374 | 0.983547559 | 8 | 126766828 | 128073654 |
| beer-intake | PS | 0.270806 | -0.10506 | 0.68857 | 0.0733362 | 0 | 0.47413 | 0.149389 | 0.55216732 | 8 | 129291119 | 130383563 |
| beer-intake | PS | -0.0289675 | -1 | 1 | 0.000839116 | 0 | 1 | 0.948976 | 0.98795147 | 8 | 132534637 | 133461551 |
| beer-intake | PS | 0.187268 | -0.32441 | 0.8056 | 0.0350692 | 0 | 0.65815 | 0.440175 | 0.779615808 | 8 | 133461552 | 134509448 |
| beer-intake | PS | 0.288557 | -0.21176 | 0.91373 | 0.0832653 | 0 | 0.83647 | 0.22773 | 0.620938095 | 8 | 135313674 | 136220342 |
| beer-intake | PS | 0.297086 | -0.24826 | 1 | 0.0882602 | 0 | 1 | 0.258355 | 0.643621228 | 8 | 138564844 | 139404631 |
| beer-intake | PS | -0.0869683 | -1 | 0.71923 | 0.00756348 | 0 | 1 | 0.788294 | 0.933152665 | 8 | 140355989 | 141527881 |
| beer-intake | PS | -0.125279 | -1 | 0.61878 | 0.0156948 | 0 | 1 | 0.688656 | 0.900892552 | 8 | 144934289 | 146303787 |
| beer-intake | PS | -0.0799533 | -0.79485 | 0.57833 | 0.00639252 | 0 | 0.71556 | 0.775061 | 0.929934281 | 9 | 653662 | 1103598 |
| beer-intake | PS | -0.200116 | -0.94156 | 0.40329 | 0.0400464 | 0 | 0.93722 | 0.460804 | 0.793255992 | 9 | 1874962 | 2441120 |
| beer-intake | PS | -0.455256 | -1 | 0.25903 | 0.207258 | 0 | 1 | 0.182791 | 0.587671259 | 9 | 3079046 | 4025355 |
| beer-intake | PS | 0.462349 | -0.06042 | 1 | 0.213767 | 0 | 1 | 0.0745204 | 0.450639179 | 9 | 4025356 | 4596614 |
| beer-intake | PS | -0.213598 | -1 | 0.41882 | 0.0456241 | 0 | 1 | 0.459687 | 0.792607357 | 9 | 4596615 | 5437591 |
| beer-intake | PS | 0.265377 | -0.40735 | 1 | 0.0704247 | 0 | 1 | 0.384621 | 0.751421205 | 9 | 7388203 | 8262303 |
| beer-intake | PS | -0.16707 | -0.90435 | 0.46031 | 0.0279124 | 0 | 0.89865 | 0.548165 | 0.842894016 | 9 | 12664859 | 13512852 |
| beer-intake | PS | 0.371606 | -0.21232 | 1 | 0.138091 | 0 | 1 | 0.185419 | 0.58904054 | 9 | 13512853 | 14244747 |
| beer-intake | PS | -0.473429 | -1 | 0.29074 | 0.224135 | 0 | 1 | 0.191593 | 0.596557161 | 9 | 14902925 | 15839403 |
| beer-intake | PS | 0.742696 | 0.03379 | 1 | 0.551597 | 0.00877 | 1 | 0.0449546 | 0.364321895 | 9 | 19463293 | 20483880 |
| beer-intake | PS | 0.144068 | -0.37137 | 0.7866 | 0.0207556 | 0 | 0.64192 | 0.549487 | 0.843473948 | 9 | 23091194 | 23859374 |
| beer-intake | PS | -0.0608474 | -0.7196 | 0.56559 | 0.0037024 | 0 | 0.64405 | 0.819675 | 0.944542385 | 9 | 28067455 | 28766060 |
| beer-intake | PS | -0.193242 | -1 | 0.78757 | 0.0373 | 0 | 1 | 0.620147 | 0.867109031 | 9 | 29596502 | 30410078 |
| beer-intake | PS | -0.218477 | -1 | 0.41012 | 0.0477324 | 0 | 1 | 0.448294 | 0.785321521 | 9 | 30410079 | 31115153 |
| beer-intake | PS | -0.00572734 | -0.59642 | 0.58212 | 0.0000328 | 0 | 0.51916 | 0.982096 | 0.996292185 | 9 | 32253284 | 33194892 |
| beer-intake | PS | -0.587609 | -1 | -0.05696 | 0.345284 | 0.00755 | 1 | 0.0335955 | 0.335303046 | 9 | 34704545 | 36749273 |
| beer-intake | PS | -0.382213 | -1 | 0.29315 | 0.146 | 0 | 1 | 0.229287 | 0.620938095 | 9 | 72288879 | 73915494 |
| beer-intake | PS | 0.325872 | -0.09965 | 0.86255 | 0.106193 | 0 | 0.744 | 0.128244 | 0.532881557 | 9 | 76197745 | 77862308 |
| beer-intake | PS | 0.0150952 | -0.75877 | 0.84248 | 0.000227866 | 0 | 1 | 0.961154 | 0.991317435 | 9 | 79451036 | 80137024 |
| beer-intake | PS | -0.138983 | -0.82962 | 0.45564 | 0.0193162 | 0 | 0.73537 | 0.595847 | 0.856751476 | 9 | 81161598 | 82601465 |
| beer-intake | PS | -0.435769 | -1 | 0.11941 | 0.189895 | 0 | 1 | 0.118243 | 0.518364615 | 9 | 91643256 | 92500277 |
| beer-intake | PS | 0.171278 | -0.5403 | 1 | 0.0293361 | 0 | 1 | 0.57555 | 0.851123444 | 9 | 92500278 | 93441050 |
| beer-intake | PS | -0.373353 | -1 | 0.51848 | 0.139392 | 0 | 1 | 0.327111 | 0.706605148 | 9 | 93441051 | 94175374 |
| beer-intake | PS | -0.0779306 | -1 | 1 | 0.00607318 | 0 | 1 | 0.851734 | 0.955373322 | 9 | 97418634 | 98885862 |
| beer-intake | PS | -0.364516 | -1 | 0.22301 | 0.132872 | 0 | 1 | 0.195193 | 0.599718098 | 9 | 104222849 | 105043411 |
| beer-intake | PS | -0.0585064 | -0.79204 | 0.63137 | 0.003423 | 0 | 0.79792 | 0.83816 | 0.949178419 | 9 | 107061020 | 108203095 |
| beer-intake | PS | -0.0608705 | -0.3524 | 0.22653 | 0.00370521 | 0 | 0.12832 | 0.666726 | 0.893527746 | 9 | 109150718 | 110630150 |
| beer-intake | PS | -0.43792 | -0.86933 | -0.11509 | 0.191774 | 0.01423 | 0.75573 | 0.0100956 | 0.240673209 | 9 | 110630151 | 111368107 |
| beer-intake | PS | -0.0767423 | -0.55339 | 0.38326 | 0.00588938 | 0 | 0.33687 | 0.714958 | 0.906613519 | 9 | 111368108 | 112076381 |
| beer-intake | PS | 0.335707 | -0.35016 | 1 | 0.113 | 0 | 1 | 0.302745 | 0.687119646 | 9 | 112076382 | 112865520 |
| beer-intake | PS | -0.236767 | -1 | 0.64535 | 0.0560586 | 0 | 1 | 0.511423 | 0.822603387 | 9 | 114443476 | 115390112 |
| beer-intake | PS | 0.25949 | -0.36942 | 1 | 0.0673349 | 0 | 1 | 0.380614 | 0.747107314 | 9 | 115390113 | 116159540 |
| beer-intake | PS | 0.0046136 | -0.72551 | 0.78855 | 0.0000213 | 0 | 0.9113 | 0.987639 | 0.998059082 | 9 | 116159541 | 117054909 |
| beer-intake | PS | -0.183647 | -0.63627 | 0.22608 | 0.0337261 | 0 | 0.40708 | 0.358277 | 0.733165841 | 9 | 117054910 | 117989017 |
| beer-intake | PS | 0.543933 | 0.06377 | 1 | 0.295863 | 0.00805 | 1 | 0.0276401 | 0.308097497 | 9 | 117989018 | 119001227 |
| beer-intake | PS | -0.598335 | -1 | -0.03865 | 0.358005 | 0.00679 | 1 | 0.0379677 | 0.351281893 | 9 | 128785783 | 129617771 |
| beer-intake | PS | 0.130078 | -0.3707 | 0.67332 | 0.0169203 | 0 | 0.4673 | 0.57613 | 0.851421077 | 9 | 129617772 | 130902727 |
| beer-intake | PS | -0.336003 | -0.89492 | 0.1183 | 0.112898 | 0 | 0.80223 | 0.132065 | 0.53799409 | 9 | 132193799 | 132999452 |
| beer-intake | PS | -0.250834 | -0.6532 | 0.11226 | 0.0629178 | 0 | 0.42667 | 0.175053 | 0.582296617 | 9 | 136042491 | 136770926 |
| beer-intake | PS | 0.119605 | -0.40719 | 0.71908 | 0.0143054 | 0 | 0.54218 | 0.620358 | 0.867109031 | 9 | 136770927 | 137593527 |
| beer-intake | PS | 0.200323 | -0.2968 | 0.79493 | 0.0401294 | 0 | 0.64189 | 0.396418 | 0.756176066 | 9 | 138995792 | 140097759 |
| beer-intake | PS | 0.391517 | 0.01976 | 0.84026 | 0.153286 | 0.00265 | 0.70604 | 0.0400642 | 0.354606171 | 9 | 140097760 | 141146682 |
| beer-intake | PS | 0.280683 | -0.40284 | 1 | 0.0787827 | 0 | 1 | 0.38532 | 0.751421205 | 10 | 2637066 | 3225336 |
| beer-intake | PS | -0.277347 | -1 | 0.37242 | 0.0769211 | 0 | 1 | 0.361516 | 0.736563478 | 10 | 3225337 | 3880322 |
| beer-intake | PS | 0.0151375 | -0.47025 | 0.53068 | 0.000229145 | 0 | 0.36298 | 0.94485 | 0.986850048 | 10 | 3880323 | 4813182 |
| beer-intake | PS | -0.288326 | -0.88472 | 0.16729 | 0.0831319 | 0 | 0.79027 | 0.189374 | 0.596557161 | 10 | 5396243 | 6234718 |
| beer-intake | PS | -0.223534 | -0.66596 | 0.1435 | 0.0499674 | 0 | 0.44404 | 0.227345 | 0.620938095 | 10 | 6234719 | 6897037 |
| beer-intake | PS | 0.21401 | -0.15972 | 0.62494 | 0.0458002 | 0 | 0.39075 | 0.251711 | 0.640696318 | 10 | 6897038 | 7659872 |
| beer-intake | PS | -0.626096 | -1 | -0.25613 | 0.391996 | 0.0656 | 1 | 0.00150886 | 0.127235394 | 10 | 7659873 | 8771920 |
| beer-intake | PS | 0.451601 | -0.30902 | 1 | 0.203943 | 0 | 1 | 0.206387 | 0.603996364 | 10 | 10081280 | 10969481 |
| beer-intake | PS | 0.850642 | 0.27578 | 1 | 0.723591 | 0.07759 | 1 | 0.00529004 | 0.19703444 | 10 | 12581572 | 13208061 |
| beer-intake | PS | -0.532421 | -1 | 0.15173 | 0.283473 | 0 | 1 | 0.116412 | 0.516275157 | 10 | 13208062 | 14008135 |
| beer-intake | PS | 0.726558 | 0.36221 | 1 | 0.527887 | 0.1312 | 1 | 0.000243939 | 0.05598169 | 10 | 17065861 | 18529742 |
| beer-intake | PS | -0.450422 | -0.94009 | -0.08336 | 0.20288 | 0.00838 | 0.88376 | 0.0200623 | 0.292402657 | 10 | 23365686 | 24489447 |
| beer-intake | PS | 0.0799147 | -0.31272 | 0.47336 | 0.00638636 | 0 | 0.23741 | 0.664725 | 0.89267757 | 10 | 24489448 | 25577761 |
| beer-intake | PS | -0.0397671 | -0.80112 | 0.67475 | 0.00158142 | 0 | 0.85163 | 0.893715 | 0.971310138 | 10 | 28734423 | 29393749 |
| beer-intake | PS | -0.0209836 | -0.61523 | 0.57902 | 0.000440311 | 0 | 0.5379 | 0.934911 | 0.982241359 | 10 | 36475839 | 37561443 |
| beer-intake | PS | 0.324075 | -0.24627 | 1 | 0.105025 | 0 | 1 | 0.241795 | 0.633281852 | 10 | 46327145 | 49197320 |
| beer-intake | PS | -0.251927 | -0.88682 | 0.24491 | 0.0634674 | 0 | 0.78989 | 0.293985 | 0.677597043 | 10 | 53129610 | 53919161 |
| beer-intake | PS | -0.306793 | -1 | 0.38358 | 0.0941218 | 0 | 1 | 0.336935 | 0.713887872 | 10 | 55867695 | 57044845 |
| beer-intake | PS | -0.182566 | -0.98204 | 0.45674 | 0.0333305 | 0 | 1 | 0.519682 | 0.822603387 | 10 | 59822947 | 61470383 |
| beer-intake | PS | -0.0955971 | -0.62065 | 0.39271 | 0.0091388 | 0 | 0.4092 | 0.67313 | 0.89679545 | 10 | 61470384 | 62626465 |
| beer-intake | PS | 0.229349 | -0.22355 | 0.78631 | 0.052601 | 0 | 0.62081 | 0.316025 | 0.695979535 | 10 | 64069688 | 65400431 |
| beer-intake | PS | 0.772471 | -0.05701 | 1 | 0.596712 | 0 | 1 | 0.0689298 | 0.436297724 | 10 | 66510388 | 67146043 |
| beer-intake | PS | 0.610327 | -0.05196 | 1 | 0.372499 | 0 | 1 | 0.0715914 | 0.442981945 | 10 | 68623275 | 69904170 |
| beer-intake | PS | 0.614285 | -0.01945 | 1 | 0.377345 | 0 | 1 | 0.0609984 | 0.409919289 | 10 | 69904171 | 71050504 |
| beer-intake | PS | 0.085864 | -0.24275 | 0.43951 | 0.00737262 | 0 | 0.19589 | 0.605563 | 0.860368673 | 10 | 71050505 | 71672997 |
| beer-intake | PS | -0.0521748 | -0.5608 | 0.4493 | 0.00272221 | 0 | 0.37401 | 0.81826 | 0.944542385 | 10 | 71672998 | 72659223 |
| beer-intake | PS | -0.123151 | -0.65134 | 0.3598 | 0.0151661 | 0 | 0.44153 | 0.579661 | 0.853279664 | 10 | 72659224 | 73514214 |
| beer-intake | PS | 0.403883 | 0.03108 | 0.86501 | 0.163122 | 0.00285 | 0.74824 | 0.0372846 | 0.350926523 | 10 | 73514215 | 75694023 |
| beer-intake | PS | -0.061112 | -0.8116 | 0.61823 | 0.00373468 | 0 | 0.8553 | 0.832091 | 0.946695205 | 10 | 78665482 | 79952996 |
| beer-intake | PS | 0.0337655 | -0.26119 | 0.3365 | 0.00114011 | 0 | 0.12607 | 0.818067 | 0.944542385 | 10 | 79952997 | 81190573 |
| beer-intake | PS | 0.149084 | -0.3414 | 0.74444 | 0.0222261 | 0 | 0.58623 | 0.515965 | 0.822603387 | 10 | 83596351 | 84679429 |
| beer-intake | PS | -0.0489904 | -0.96145 | 0.80118 | 0.00240006 | 0 | 1 | 0.881719 | 0.965761891 | 10 | 88443653 | 89971628 |
| beer-intake | PS | -0.331906 | -1 | 0.26247 | 0.110161 | 0 | 1 | 0.244948 | 0.635923145 | 10 | 89971629 | 91021321 |
| beer-intake | PS | 0.716772 | 0.17548 | 1 | 0.513762 | 0.03259 | 1 | 0.0117679 | 0.252030603 | 10 | 98005995 | 99367800 |
| beer-intake | PS | -0.45294 | -1 | 0.00058 | 0.205154 | 0 | 1 | 0.0521289 | 0.38002899 | 10 | 101271452 | 102509298 |
| beer-intake | PS | -0.356787 | -1 | 0.33441 | 0.127297 | 0 | 1 | 0.272382 | 0.656699802 | 10 | 102509299 | 104206837 |
| beer-intake | PS | -0.285616 | -1 | 0.23954 | 0.0815763 | 0 | 1 | 0.264762 | 0.650122942 | 10 | 104206838 | 106142283 |
| beer-intake | PS | -0.17348 | -1 | 0.65695 | 0.0300953 | 0 | 1 | 0.624727 | 0.868930667 | 10 | 107877788 | 108725997 |
| beer-intake | PS | 0.271087 | -0.27437 | 0.98666 | 0.0735 | 0 | 0.98767 | 0.305108 | 0.688484504 | 10 | 109579150 | 110358382 |
| beer-intake | PS | -0.149713 | -1 | 0.78842 | 0.022414 | 0 | 1 | 0.685438 | 0.900136915 | 10 | 112164982 | 113117615 |
| beer-intake | PS | -0.0804271 | -0.3874 | 0.21113 | 0.00646852 | 0 | 0.1534 | 0.587656 | 0.855475038 | 10 | 114255955 | 115588903 |
| beer-intake | PS | -0.258005 | -1 | 0.71542 | 0.0665665 | 0 | 1 | 0.512554 | 0.822603387 | 10 | 116845214 | 118416049 |
| beer-intake | PS | 0.000609343 | -0.3367 | 0.34062 | 0.000000371 | 0 | 0.15334 | 0.997005 | 0.999256787 | 10 | 118416050 | 119528730 |
| beer-intake | PS | 0.30465 | -0.22683 | 1 | 0.0928113 | 0 | 1 | 0.228847 | 0.620938095 | 10 | 119528731 | 120592839 |
| beer-intake | PS | 0.291806 | -0.29043 | 1 | 0.0851507 | 0 | 1 | 0.29143 | 0.67501725 | 10 | 120592840 | 121874445 |
| beer-intake | PS | -0.404629 | -1 | 0.09972 | 0.163724 | 0 | 1 | 0.108479 | 0.507510235 | 10 | 121874446 | 122803506 |
| beer-intake | PS | 0.460182 | -0.15961 | 1 | 0.211768 | 0 | 1 | 0.134704 | 0.539534395 | 10 | 122803507 | 123856184 |
| beer-intake | PS | -0.337273 | -1 | 0.28513 | 0.113753 | 0 | 1 | 0.251205 | 0.640561778 | 10 | 124894143 | 125798319 |
| beer-intake | PS | -0.0179496 | -0.4499 | 0.41386 | 0.000322187 | 0 | 0.26243 | 0.928442 | 0.980372316 | 10 | 126875817 | 127997708 |
| beer-intake | PS | -0.196708 | -0.93069 | 0.40304 | 0.0386942 | 0 | 0.89946 | 0.472172 | 0.797472807 | 10 | 127997709 | 129134738 |
| beer-intake | PS | -0.319414 | -1 | 0.23883 | 0.102026 | 0 | 1 | 0.233406 | 0.622973542 | 10 | 130694009 | 131694738 |
| beer-intake | PS | -0.101334 | -1 | 0.69749 | 0.0102686 | 0 | 1 | 0.758971 | 0.925615865 | 10 | 133111171 | 133818036 |
| beer-intake | PS | -0.171063 | -0.87681 | 0.41589 | 0.0292624 | 0 | 0.83212 | 0.510124 | 0.822603387 | 11 | 1857846 | 2477449 |
| beer-intake | PS | 0.210394 | -0.67651 | 1 | 0.0442655 | 0 | 1 | 0.561796 | 0.845152343 | 11 | 2477450 | 3362508 |
| beer-intake | PS | -0.178205 | -1 | 0.56382 | 0.0317569 | 0 | 1 | 0.575586 | 0.851123444 | 11 | 4405708 | 4946051 |
| beer-intake | PS | 0.392751 | -0.08981 | 1 | 0.154253 | 0 | 1 | 0.103374 | 0.496571285 | 11 | 6180841 | 7191230 |
| beer-intake | PS | 0.124267 | -0.38065 | 0.6667 | 0.0154423 | 0 | 0.46338 | 0.596398 | 0.856751476 | 11 | 7191231 | 7915071 |
| beer-intake | PS | 0.488963 | -0.19985 | 1 | 0.239085 | 0 | 1 | 0.14391 | 0.545236775 | 11 | 9080940 | 10370100 |
| beer-intake | PS | 0.0159304 | -0.60676 | 0.65958 | 0.000253779 | 0 | 0.57475 | 0.95188 | 0.988457854 | 11 | 10370101 | 11081299 |
| beer-intake | PS | -0.814495 | -1 | -0.33016 | 0.663402 | 0.109 | 1 | 0.00157366 | 0.127235394 | 11 | 11632651 | 12470449 |
| beer-intake | PS | 0.195206 | -0.33248 | 0.8861 | 0.0381053 | 0 | 0.81797 | 0.43292 | 0.773477418 | 11 | 12470450 | 13364727 |
| beer-intake | PS | -0.787359 | -1 | -0.15501 | 0.619935 | 0.02864 | 1 | 0.0192403 | 0.292045418 | 11 | 16383387 | 17583948 |
| beer-intake | PS | -0.569211 | -1 | -0.03502 | 0.324001 | 0.00576 | 1 | 0.0385597 | 0.351776481 | 11 | 17583949 | 18740267 |
| beer-intake | PS | -0.0742347 | -1 | 0.81979 | 0.00551078 | 0 | 1 | 0.825641 | 0.945132354 | 11 | 18740268 | 19780784 |
| beer-intake | PS | 0.609399 | -0.05531 | 1 | 0.371367 | 0 | 1 | 0.0740679 | 0.449638962 | 11 | 19780785 | 20686336 |
| beer-intake | PS | 0.581791 | -0.30137 | 1 | 0.338481 | 0 | 1 | 0.174337 | 0.582296617 | 11 | 25662919 | 26356980 |
| beer-intake | PS | 0.30541 | -0.16759 | 1 | 0.0932755 | 0 | 1 | 0.204796 | 0.603996364 | 11 | 27018308 | 28577718 |
| beer-intake | PS | 0.59859 | 0.10261 | 1 | 0.35831 | 0.01315 | 1 | 0.020155 | 0.292402657 | 11 | 32830423 | 33905327 |
| beer-intake | PS | -0.236778 | -1 | 0.35455 | 0.0560637 | 0 | 1 | 0.393183 | 0.754486297 | 11 | 33905328 | 34672697 |
| beer-intake | PS | 0.0605867 | -0.23775 | 0.36361 | 0.00367075 | 0 | 0.13663 | 0.682988 | 0.900136915 | 11 | 35500368 | 36331189 |
| beer-intake | PS | -0.025911 | -0.35774 | 0.29778 | 0.00067138 | 0 | 0.14322 | 0.867126 | 0.959359878 | 11 | 36331190 | 37119024 |
| beer-intake | PS | 0.396556 | -0.24575 | 1 | 0.157257 | 0 | 1 | 0.19866 | 0.602877424 | 11 | 39329141 | 40362940 |
| beer-intake | PS | 0.619611 | -0.00428 | 1 | 0.383918 | 0 | 1 | 0.0529648 | 0.383554405 | 11 | 40362941 | 41603195 |
| beer-intake | PS | 0.519437 | -0.01095 | 1 | 0.269815 | 0 | 1 | 0.0580231 | 0.402808045 | 11 | 43949378 | 45019559 |
| beer-intake | PS | 0.099734 | -0.55983 | 0.82219 | 0.00994687 | 0 | 0.81975 | 0.725859 | 0.912492492 | 11 | 45019560 | 46316005 |
| beer-intake | PS | -0.536807 | -1 | 0.09497 | 0.288 | 0 | 1 | 0.0924534 | 0.480556332 | 11 | 59256233 | 60515105 |
| beer-intake | PS | -0.388332 | -0.78967 | -0.04257 | 0.150801 | 0.00356 | 0.62358 | 0.030214 | 0.318452682 | 11 | 60515106 | 61717117 |
| beer-intake | PS | 0.111303 | -0.40234 | 0.6833 | 0.0123884 | 0 | 0.48962 | 0.63868 | 0.873870499 | 11 | 61717118 | 62800368 |
| beer-intake | PS | 0.393775 | -0.02704 | 0.94181 | 0.155059 | 0 | 0.88701 | 0.0640807 | 0.41941396 | 11 | 62800369 | 64594822 |
| beer-intake | PS | 0.00643588 | -0.39575 | 0.41687 | 0.0000414 | 0 | 0.23919 | 0.97274 | 0.994031669 | 11 | 71242835 | 72875068 |
| beer-intake | PS | -0.0420969 | -0.74952 | 0.70154 | 0.00177215 | 0 | 0.85893 | 0.885366 | 0.968348232 | 11 | 72875069 | 74399331 |
| beer-intake | PS | -0.343471 | -1 | 0.18614 | 0.117972 | 0 | 1 | 0.173569 | 0.582296617 | 11 | 75445254 | 76518906 |
| beer-intake | PS | 0.0676776 | -0.41512 | 0.59409 | 0.00458025 | 0 | 0.38615 | 0.762503 | 0.927498994 | 11 | 79802287 | 80726012 |
| beer-intake | PS | -0.0962584 | -0.93036 | 0.63716 | 0.00926567 | 0 | 1 | 0.748243 | 0.922342547 | 11 | 86629334 | 87676870 |
| beer-intake | PS | -0.808628 | -1 | -0.1253 | 0.65388 | 0.02407 | 1 | 0.0296244 | 0.318452682 | 11 | 90967062 | 92209168 |
| beer-intake | PS | -0.0292174 | -0.43593 | 0.37332 | 0.000853657 | 0 | 0.22046 | 0.877648 | 0.964143413 | 11 | 94384536 | 95327210 |
| beer-intake | PS | 0.219692 | -0.15947 | 0.64826 | 0.0482648 | 0 | 0.42024 | 0.246452 | 0.637199691 | 11 | 95327211 | 96150134 |
| beer-intake | PS | 0.484533 | 0.05772 | 1 | 0.234773 | 0.00596 | 1 | 0.0291472 | 0.316261645 | 11 | 109891838 | 111117780 |
| beer-intake | PS | 0.19989 | -0.23089 | 0.71077 | 0.0399559 | 0 | 0.50859 | 0.343828 | 0.717993765 | 11 | 112755447 | 113889019 |
| beer-intake | PS | 0.13617 | -0.4785 | 0.86438 | 0.0185424 | 0 | 0.79561 | 0.620729 | 0.867109031 | 11 | 113889020 | 114742317 |
| beer-intake | PS | 0.439993 | -0.09331 | 1 | 0.193593 | 0 | 1 | 0.103078 | 0.496571285 | 11 | 114742318 | 116247377 |
| beer-intake | PS | -0.241344 | -1 | 0.6245 | 0.058247 | 0 | 1 | 0.500737 | 0.814040339 | 11 | 118901214 | 120064528 |
| beer-intake | PS | -0.155607 | -0.58494 | 0.25968 | 0.0242135 | 0 | 0.34415 | 0.431705 | 0.772822169 | 11 | 120064529 | 121208186 |
| beer-intake | PS | -0.17877 | -0.64388 | 0.23169 | 0.0319589 | 0 | 0.41972 | 0.372999 | 0.744263178 | 11 | 121208187 | 122589224 |
| beer-intake | PS | 0.20143 | -0.31111 | 0.81144 | 0.0405742 | 0 | 0.66565 | 0.408619 | 0.766733809 | 11 | 122589225 | 123398882 |
| beer-intake | PS | 0.179828 | -0.3415 | 0.83111 | 0.0323383 | 0 | 0.69953 | 0.47341 | 0.798104958 | 11 | 124403478 | 125266684 |
| beer-intake | PS | 0.220619 | -0.22217 | 0.7547 | 0.0486726 | 0 | 0.57358 | 0.310333 | 0.693260997 | 11 | 126304241 | 127306871 |
| beer-intake | PS | -0.312945 | -0.6362 | -0.0229 | 0.0979345 | 0.00213 | 0.40476 | 0.0353938 | 0.342762835 | 11 | 127306872 | 128262550 |
| beer-intake | PS | -0.153521 | -0.52853 | 0.19389 | 0.0235686 | 0 | 0.28112 | 0.376047 | 0.744326334 | 11 | 128262551 | 129451784 |
| beer-intake | PS | -0.181599 | -0.62205 | 0.20843 | 0.0329781 | 0 | 0.38955 | 0.351375 | 0.726720141 | 11 | 129451785 | 130500783 |
| beer-intake | PS | 0.0490358 | -0.48274 | 0.62875 | 0.00240451 | 0 | 0.47434 | 0.840496 | 0.949371541 | 11 | 130500784 | 131424361 |
| beer-intake | PS | -0.0567214 | -0.48667 | 0.37899 | 0.00321732 | 0 | 0.26711 | 0.777318 | 0.929934281 | 11 | 133521643 | 134351064 |
| beer-intake | PS | -0.401195 | -1 | 0.28228 | 0.160958 | 0 | 1 | 0.203604 | 0.60356984 | 11 | 134351065 | 134946450 |
| beer-intake | PS | -0.0801434 | -0.45469 | 0.28959 | 0.00642296 | 0 | 0.21755 | 0.65456 | 0.886651297 | 12 | 3069507 | 3871114 |
| beer-intake | PS | 0.0981165 | -0.24442 | 0.4631 | 0.00962685 | 0 | 0.21927 | 0.563876 | 0.845943508 | 12 | 6023701 | 6948954 |
| beer-intake | PS | -0.0864781 | -0.67731 | 0.47884 | 0.00747847 | 0 | 0.52113 | 0.733127 | 0.916689426 | 12 | 8123318 | 8760628 |
| beer-intake | PS | -0.0278281 | -0.62937 | 0.53694 | 0.000774406 | 0 | 0.56854 | 0.905793 | 0.975080055 | 12 | 8760629 | 10176713 |
| beer-intake | PS | -0.0941542 | -0.91623 | 0.59244 | 0.00886502 | 0 | 1 | 0.746476 | 0.922084197 | 12 | 11742150 | 12721874 |
| beer-intake | PS | -0.202557 | -0.74704 | 0.25659 | 0.0410292 | 0 | 0.56738 | 0.367049 | 0.741711226 | 12 | 12721875 | 13559527 |
| beer-intake | PS | 0.39611 | -0.08945 | 1 | 0.156903 | 0 | 1 | 0.110565 | 0.508421114 | 12 | 13559528 | 14656849 |
| beer-intake | PS | -0.476433 | -1 | 0.23498 | 0.226989 | 0 | 1 | 0.171476 | 0.582296617 | 12 | 14656850 | 16136742 |
| beer-intake | PS | 0.439052 | -0.20674 | 1 | 0.192767 | 0 | 1 | 0.161995 | 0.574093371 | 12 | 16136743 | 17374895 |
| beer-intake | PS | -0.539645 | -1 | 0.09484 | 0.291217 | 0 | 1 | 0.0961244 | 0.482879102 | 12 | 20074931 | 20866285 |
| beer-intake | PS | 0.0263838 | -0.36574 | 0.44011 | 0.000696103 | 0 | 0.22307 | 0.888554 | 0.969601525 | 12 | 22928056 | 23923798 |
| beer-intake | PS | 0.459945 | -0.13845 | 1 | 0.211549 | 0 | 1 | 0.123465 | 0.527106784 | 12 | 23923799 | 25058714 |
| beer-intake | PS | 0.0174007 | -0.39075 | 0.42501 | 0.000302783 | 0 | 0.22795 | 0.923883 | 0.979618732 | 12 | 25058715 | 25990813 |
| beer-intake | PS | 0.0807404 | -0.26379 | 0.43994 | 0.00651901 | 0 | 0.19952 | 0.638673 | 0.873870499 | 12 | 25990814 | 26958056 |
| beer-intake | PS | 0.250222 | -0.21351 | 0.82382 | 0.062611 | 0 | 0.67868 | 0.271805 | 0.656594031 | 12 | 29647194 | 30358377 |
| beer-intake | PS | 0.450686 | -0.2952 | 1 | 0.203118 | 0 | 1 | 0.197651 | 0.601902798 | 12 | 40017397 | 41198229 |
| beer-intake | PS | -0.0905851 | -0.47057 | 0.27433 | 0.00820565 | 0 | 0.22802 | 0.615136 | 0.863358047 | 12 | 48960266 | 50344346 |
| beer-intake | PS | 0.128349 | -0.4519 | 0.83008 | 0.0164736 | 0 | 0.74609 | 0.626492 | 0.868930667 | 12 | 54371449 | 55416802 |
| beer-intake | PS | -0.098396 | -0.52875 | 0.3218 | 0.00968177 | 0 | 0.29522 | 0.607134 | 0.861119261 | 12 | 55416803 | 56987105 |
| beer-intake | PS | -0.326502 | -0.79095 | 0.05988 | 0.106603 | 0 | 0.62563 | 0.097611 | 0.48449472 | 12 | 56987106 | 58748139 |
| beer-intake | PS | -0.219635 | -0.69786 | 0.19829 | 0.0482397 | 0 | 0.4877 | 0.289452 | 0.675011382 | 12 | 58748140 | 60000363 |
| beer-intake | PS | 0.436174 | -0.1495 | 1 | 0.190248 | 0 | 1 | 0.138291 | 0.540048903 | 12 | 61737954 | 63055936 |
| beer-intake | PS | 0.131793 | -0.37225 | 0.68509 | 0.0173693 | 0 | 0.48989 | 0.57965 | 0.853279664 | 12 | 64403858 | 66114643 |
| beer-intake | PS | 0.185396 | -0.25817 | 0.70747 | 0.0343717 | 0 | 0.50205 | 0.383075 | 0.750523665 | 12 | 66114644 | 67183620 |
| beer-intake | PS | 0.0823202 | -0.79526 | 1 | 0.00677662 | 0 | 1 | 0.811276 | 0.944347553 | 12 | 67183621 | 68006682 |
| beer-intake | PS | 0.258772 | -0.30174 | 0.99667 | 0.0669627 | 0 | 1 | 0.328623 | 0.70750344 | 12 | 68006683 | 68839661 |
| beer-intake | PS | 0.659608 | 0.21316 | 1 | 0.435083 | 0.04558 | 1 | 0.00548736 | 0.200879756 | 12 | 68839662 | 70097805 |
| beer-intake | PS | -0.156467 | -1 | 0.58059 | 0.0244819 | 0 | 1 | 0.621696 | 0.867717579 | 12 | 70097806 | 71177961 |
| beer-intake | PS | 0.650431 | 0.06532 | 1 | 0.42306 | 0.01155 | 1 | 0.0340438 | 0.336930457 | 12 | 71177962 | 71948185 |
| beer-intake | PS | 0.485897 | -0.00618 | 1 | 0.236096 | 0 | 1 | 0.0584602 | 0.402808045 | 12 | 79315179 | 80952472 |
| beer-intake | PS | -0.206226 | -1 | 0.63067 | 0.0425291 | 0 | 1 | 0.55716 | 0.844401188 | 12 | 80952473 | 81843890 |
| beer-intake | PS | 0.153293 | -0.32764 | 0.69555 | 0.0234986 | 0 | 0.49665 | 0.489998 | 0.807026459 | 12 | 82576130 | 83551125 |
| beer-intake | PS | -0.197428 | -1 | 0.53391 | 0.038978 | 0 | 1 | 0.524906 | 0.826587751 | 12 | 88344765 | 90567001 |
| beer-intake | PS | 0.0111868 | -0.70479 | 0.7568 | 0.000125145 | 0 | 0.8555 | 0.970063 | 0.993719113 | 12 | 92061180 | 93487547 |
| beer-intake | PS | 0.0257659 | -0.41066 | 0.45519 | 0.000663881 | 0 | 0.2524 | 0.898574 | 0.971964844 | 12 | 96017783 | 96828314 |
| beer-intake | PS | 0.277536 | -0.26065 | 0.99897 | 0.0770263 | 0 | 0.99992 | 0.292008 | 0.67501725 | 12 | 99244338 | 100931423 |
| beer-intake | PS | 0.542807 | 0.02141 | 1 | 0.294639 | 0.00506 | 1 | 0.0473187 | 0.369827342 | 12 | 100931424 | 101825061 |
| beer-intake | PS | 0.0931793 | -0.81454 | 1 | 0.00868238 | 0 | 1 | 0.79074 | 0.935370098 | 12 | 101825062 | 102966633 |
| beer-intake | PS | 0.631745 | 0.06553 | 1 | 0.399102 | 0.00969 | 1 | 0.030592 | 0.318452682 | 12 | 102966634 | 104140831 |
| beer-intake | PS | -0.374801 | -1 | 0.09556 | 0.14 | 0 | 1 | 0.111261 | 0.50893337 | 12 | 106153788 | 106964977 |
| beer-intake | PS | -0.0170971 | -0.612 | 0.58973 | 0.000292311 | 0 | 0.52782 | 0.947465 | 0.98795147 | 12 | 108183189 | 109031819 |
| beer-intake | PS | 0.221161 | -0.3191 | 0.94562 | 0.0489 | 0 | 0.91721 | 0.373271 | 0.744263178 | 12 | 109031820 | 110111514 |
| beer-intake | PS | -0.30515 | -0.85396 | 0.07817 | 0.0931164 | 0 | 0.73399 | 0.120324 | 0.518850788 | 12 | 111592382 | 113947983 |
| beer-intake | PS | 0.0099645 | -0.3388 | 0.36235 | 0.0000993 | 0 | 0.16755 | 0.953451 | 0.988457854 | 12 | 116197676 | 117091843 |
| beer-intake | PS | 0.338218 | -0.22487 | 1 | 0.114391 | 0 | 1 | 0.208915 | 0.606076286 | 12 | 117091844 | 118256124 |
| beer-intake | PS | -0.0023347 | -0.5713 | 0.5688 | 0.00000545 | 0 | 0.47113 | 0.992564 | 0.998435708 | 12 | 119301062 | 120567740 |
| beer-intake | PS | 0.239451 | -0.54993 | 1 | 0.0573367 | 0 | 1 | 0.477526 | 0.800410688 | 12 | 123396635 | 124843768 |
| beer-intake | PS | 0.0590009 | -0.33459 | 0.47153 | 0.00348111 | 0 | 0.25136 | 0.754382 | 0.923275238 | 12 | 127545378 | 128372588 |
| beer-intake | PS | 0.320796 | -0.20774 | 1 | 0.103 | 0 | 1 | 0.220308 | 0.619746708 | 12 | 129170297 | 129887418 |
| beer-intake | PS | -0.676818 | -1 | -0.22538 | 0.458083 | 0.05152 | 1 | 0.00446349 | 0.180249734 | 12 | 129887419 | 130629840 |
| beer-intake | PS | 0.0855251 | -0.41525 | 0.633 | 0.00731454 | 0 | 0.42703 | 0.71598 | 0.906613519 | 13 | 20491182 | 21540733 |
| beer-intake | PS | 1 | 0.13769 | 1 | 1 | 0.03014 | 1 | 0.00689459 | 0.205706476 | 13 | 22795189 | 23729049 |
| beer-intake | PS | -0.00323076 | -0.82145 | 0.78693 | 0.0000104 | 0 | 1 | 0.991843 | 0.998435708 | 13 | 23729050 | 24818333 |
| beer-intake | PS | -0.399256 | -1 | 0.57368 | 0.159405 | 0 | 1 | 0.355239 | 0.731532518 | 13 | 26681710 | 27392005 |
| beer-intake | PS | 0.0182698 | -0.43536 | 0.47525 | 0.000333785 | 0 | 0.3114 | 0.928186 | 0.980372316 | 13 | 28587126 | 30068525 |
| beer-intake | PS | 0.388572 | -0.29056 | 1 | 0.150988 | 0 | 1 | 0.225489 | 0.620938095 | 13 | 30068526 | 31433218 |
| beer-intake | PS | 0.222503 | -0.22872 | 0.81666 | 0.0495076 | 0 | 0.67288 | 0.330382 | 0.708953753 | 13 | 31433219 | 32986686 |
| beer-intake | PS | -0.205505 | -0.7568 | 0.28613 | 0.0422324 | 0 | 0.58524 | 0.380236 | 0.747107314 | 13 | 35744569 | 36579413 |
| beer-intake | PS | -0.0280261 | -0.57466 | 0.51737 | 0.000785461 | 0 | 0.43499 | 0.906213 | 0.975080055 | 13 | 40091624 | 41003943 |
| beer-intake | PS | 0.0868488 | -0.4 | 0.59065 | 0.00754271 | 0 | 0.38745 | 0.698729 | 0.903972224 | 13 | 41003944 | 42037054 |
| beer-intake | PS | -0.272805 | -0.85189 | 0.19088 | 0.0744224 | 0 | 0.73316 | 0.231604 | 0.622398612 | 13 | 42950158 | 43931931 |
| beer-intake | PS | 0.276595 | -0.17001 | 0.83125 | 0.076505 | 0 | 0.69434 | 0.215015 | 0.611637379 | 13 | 43931932 | 45476446 |
| beer-intake | PS | 0.563445 | 0.12279 | 1 | 0.317471 | 0.01618 | 1 | 0.0176559 | 0.283368889 | 13 | 45476447 | 46493236 |
| beer-intake | PS | 0.562777 | 0.12023 | 1 | 0.316717 | 0.01515 | 1 | 0.0157634 | 0.273599214 | 13 | 46493237 | 47433528 |
| beer-intake | PS | -0.416267 | -1 | 0.26065 | 0.173278 | 0 | 1 | 0.197234 | 0.601462413 | 13 | 49381728 | 50419896 |
| beer-intake | PS | -0.140659 | -0.69023 | 0.35559 | 0.0197849 | 0 | 0.50601 | 0.533784 | 0.832706784 | 13 | 50419897 | 51554236 |
| beer-intake | PS | 0.568415 | 0.1808 | 1 | 0.323095 | 0.03269 | 1 | 0.00614123 | 0.200879756 | 13 | 53336572 | 54684856 |
| beer-intake | PS | 0.445111 | -0.30384 | 1 | 0.198124 | 0 | 1 | 0.21564 | 0.6124176 | 13 | 54684857 | 55576912 |
| beer-intake | PS | 0.136993 | -0.28803 | 0.59462 | 0.0187671 | 0 | 0.3582 | 0.507337 | 0.82175928 | 13 | 56434008 | 58245843 |
| beer-intake | PS | -0.599514 | -1 | -0.02865 | 0.359417 | 0.00764 | 1 | 0.046606 | 0.366783605 | 13 | 66382287 | 67718879 |
| beer-intake | PS | -0.310442 | -1 | 0.76769 | 0.0963743 | 0 | 1 | 0.461746 | 0.793717072 | 13 | 67718880 | 69004702 |
| beer-intake | PS | -0.0390083 | -0.61615 | 0.51675 | 0.00152165 | 0 | 0.46962 | 0.873925 | 0.962309464 | 13 | 71010209 | 71976862 |
| beer-intake | PS | 0.550941 | 0.08082 | 1 | 0.303536 | 0.00976 | 1 | 0.0224023 | 0.297822026 | 13 | 71976863 | 73114509 |
| beer-intake | PS | 0.569306 | -0.28174 | 1 | 0.324109 | 0 | 1 | 0.171325 | 0.582296617 | 13 | 75882385 | 76671493 |
| beer-intake | PS | 0.302181 | -0.2974 | 1 | 0.0913132 | 0 | 1 | 0.297067 | 0.682293124 | 13 | 79489046 | 80778339 |
| beer-intake | PS | 0.727496 | 0.22963 | 1 | 0.529251 | 0.0535 | 1 | 0.00624437 | 0.200879756 | 13 | 91764205 | 93285142 |
| beer-intake | PS | 0.518846 | 0.10591 | 1 | 0.269201 | 0.01222 | 1 | 0.0150395 | 0.273599214 | 13 | 94925137 | 96132647 |
| beer-intake | PS | -0.122164 | -0.68128 | 0.38939 | 0.0149239 | 0 | 0.48744 | 0.606066 | 0.860603065 | 13 | 96132648 | 97516609 |
| beer-intake | PS | -0.297136 | -1 | 0.29538 | 0.0882897 | 0 | 1 | 0.300097 | 0.685396365 | 13 | 97516610 | 98527335 |
| beer-intake | PS | 0.0335557 | -0.56071 | 0.6405 | 0.00112599 | 0 | 0.62061 | 0.895095 | 0.971785522 | 13 | 98527336 | 99402294 |
| beer-intake | PS | -0.1101 | -0.77878 | 0.49303 | 0.012122 | 0 | 0.65684 | 0.676492 | 0.89679545 | 13 | 100470869 | 101573736 |
| beer-intake | PS | 0.487134 | -0.08323 | 1 | 0.2373 | 0 | 1 | 0.0938276 | 0.482879102 | 13 | 101573737 | 103050417 |
| beer-intake | PS | 0.110164 | -0.50401 | 0.81977 | 0.0121362 | 0 | 0.75016 | 0.690074 | 0.900892552 | 13 | 103050418 | 104378435 |
| beer-intake | PS | -0.285941 | -0.96685 | 0.23629 | 0.081762 | 0 | 0.94399 | 0.261184 | 0.645985626 | 13 | 104378436 | 105672500 |
| beer-intake | PS | 0.375135 | -0.19847 | 1 | 0.140726 | 0 | 1 | 0.183979 | 0.58903045 | 13 | 108521979 | 109156765 |
| beer-intake | PS | 0.153582 | -0.40101 | 0.81215 | 0.0235874 | 0 | 0.6883 | 0.556126 | 0.84420035 | 13 | 109813577 | 110995432 |
| beer-intake | PS | 0.287106 | -0.23683 | 1 | 0.0824301 | 0 | 1 | 0.260057 | 0.645890617 | 13 | 111621245 | 112319064 |
| beer-intake | PS | -0.089225 | -0.78345 | 0.52834 | 0.00796111 | 0 | 0.73747 | 0.73547 | 0.917848257 | 13 | 113573119 | 114302561 |
| beer-intake | PS | -0.270292 | -1 | 0.74546 | 0.0730577 | 0 | 1 | 0.525943 | 0.826888961 | 14 | 21982655 | 22760700 |
| beer-intake | PS | 0.215474 | -0.38767 | 0.98687 | 0.0464289 | 0 | 0.99302 | 0.426659 | 0.772599009 | 14 | 22760701 | 23985936 |
| beer-intake | PS | 0.640134 | 0.13482 | 1 | 0.409771 | 0.02079 | 1 | 0.0132706 | 0.265317787 | 14 | 23985937 | 24906056 |
| beer-intake | PS | -0.629299 | -1 | -0.1884 | 0.396018 | 0.03621 | 1 | 0.00722337 | 0.205706476 | 14 | 25585042 | 26395690 |
| beer-intake | PS | 0.257038 | -0.04338 | 0.57992 | 0.0660687 | 0 | 0.33631 | 0.0910369 | 0.478016906 | 14 | 26395691 | 27720240 |
| beer-intake | PS | 0.0561751 | -0.71452 | 0.91586 | 0.00315564 | 0 | 1 | 0.860206 | 0.95628102 | 14 | 27720241 | 29029224 |
| beer-intake | PS | -0.0501256 | -0.85954 | 0.7022 | 0.00251258 | 0 | 1 | 0.865269 | 0.958635788 | 14 | 30831155 | 32382245 |
| beer-intake | PS | 0.0662537 | -0.58355 | 0.80647 | 0.00438955 | 0 | 0.75181 | 0.812949 | 0.944536263 | 14 | 33591114 | 34695195 |
| beer-intake | PS | -0.520047 | -1 | -0.03949 | 0.270449 | 0.00587 | 1 | 0.0426606 | 0.35870143 | 14 | 34695196 | 35379988 |
| beer-intake | PS | 0.0190073 | -0.35046 | 0.38122 | 0.000361276 | 0 | 0.18293 | 0.911648 | 0.977166335 | 14 | 35379989 | 36422077 |
| beer-intake | PS | 0.112498 | -0.45193 | 0.81969 | 0.0126557 | 0 | 0.76049 | 0.654808 | 0.886651297 | 14 | 36422078 | 37282012 |
| beer-intake | PS | 0.0732088 | -0.8314 | 1 | 0.00535953 | 0 | 1 | 0.839111 | 0.949371541 | 14 | 42562551 | 43321168 |
| beer-intake | PS | -0.310879 | -1 | 0.26154 | 0.0966459 | 0 | 1 | 0.253803 | 0.640696318 | 14 | 51418372 | 52206122 |
| beer-intake | PS | -0.186495 | -0.73906 | 0.28953 | 0.0347802 | 0 | 0.55153 | 0.414587 | 0.767893591 | 14 | 54359599 | 55292832 |
| beer-intake | PS | 0.138868 | -0.42197 | 0.79802 | 0.0192843 | 0 | 0.67721 | 0.591389 | 0.855475038 | 14 | 56206431 | 57460781 |
| beer-intake | PS | 0.266629 | -0.25077 | 0.97462 | 0.0710912 | 0 | 0.95103 | 0.28698 | 0.673815011 | 14 | 58447799 | 59447537 |
| beer-intake | PS | -0.0584158 | -0.7205 | 0.56081 | 0.0034124 | 0 | 0.64063 | 0.827659 | 0.945911536 | 14 | 61652817 | 62717985 |
| beer-intake | PS | 0.383114 | -0.00068 | 0.86891 | 0.146777 | 0 | 0.75501 | 0.0518364 | 0.37957642 | 14 | 69794543 | 71140426 |
| beer-intake | PS | 0.0797893 | -0.50126 | 0.76749 | 0.00636634 | 0 | 0.71686 | 0.744549 | 0.921441281 | 14 | 72665320 | 73373373 |
| beer-intake | PS | -0.089872 | -1 | 1 | 0.00807697 | 0 | 1 | 0.823624 | 0.944550594 | 14 | 75699502 | 76694201 |
| beer-intake | PS | 0.305889 | -0.15409 | 0.91032 | 0.0935681 | 0 | 0.82868 | 0.185756 | 0.58904054 | 14 | 76694202 | 77425453 |
| beer-intake | PS | -0.377435 | -1 | 0.09286 | 0.142457 | 0 | 1 | 0.109212 | 0.508421114 | 14 | 77425454 | 78374053 |
| beer-intake | PS | 0.598548 | 0.0262 | 1 | 0.35826 | 0.00588 | 1 | 0.0422489 | 0.35870143 | 14 | 79199452 | 81001920 |
| beer-intake | PS | -0.57208 | -1 | 0.227 | 0.327275 | 0 | 1 | 0.141379 | 0.544641084 | 14 | 82524786 | 84087372 |
| beer-intake | PS | 0.0170408 | -0.66624 | 0.74277 | 0.000290388 | 0 | 0.79361 | 0.950995 | 0.988457854 | 14 | 84087373 | 85562936 |
| beer-intake | PS | 0.0596411 | -0.4847 | 0.64216 | 0.00355706 | 0 | 0.49901 | 0.812611 | 0.944536263 | 14 | 85562937 | 86653343 |
| beer-intake | PS | 0.511394 | -0.12423 | 1 | 0.261524 | 0 | 1 | 0.113829 | 0.514474053 | 14 | 90662837 | 92101228 |
| beer-intake | PS | -0.128697 | -0.73589 | 0.39671 | 0.0165628 | 0 | 0.55332 | 0.6024 | 0.859194646 | 14 | 93386329 | 94892240 |
| beer-intake | PS | -0.0834649 | -0.50143 | 0.3236 | 0.00696639 | 0 | 0.26821 | 0.672527 | 0.89679545 | 14 | 97174315 | 98268391 |
| beer-intake | PS | 0.17608 | -0.4927 | 1 | 0.0310041 | 0 | 1 | 0.561302 | 0.845152343 | 14 | 98268392 | 98885322 |
| beer-intake | PS | 0.0352581 | -0.39676 | 0.49825 | 0.00124313 | 0 | 0.28996 | 0.863359 | 0.958085094 | 14 | 99474534 | 100786189 |
| beer-intake | PS | 0.25804 | -0.30211 | 0.96324 | 0.0665846 | 0 | 0.94382 | 0.327377 | 0.706684258 | 14 | 100786190 | 102004377 |
| beer-intake | PS | 0.575865 | -0.04803 | 1 | 0.331621 | 0 | 1 | 0.0713322 | 0.44291058 | 14 | 104439107 | 105091340 |
| beer-intake | PS | 0.53047 | -0.12685 | 1 | 0.281399 | 0 | 1 | 0.111643 | 0.509669093 | 14 | 105091341 | 106347143 |
| beer-intake | PS | 0.374334 | 0.01192 | 0.79687 | 0.140126 | 0.00218 | 0.635 | 0.0392785 | 0.352687624 | 15 | 22799927 | 24099946 |
| beer-intake | PS | 0.0418021 | -0.48435 | 0.62074 | 0.00174742 | 0 | 0.46804 | 0.860082 | 0.95628102 | 15 | 29141036 | 30604119 |
| beer-intake | PS | -0.140313 | -0.6715 | 0.37045 | 0.0196879 | 0 | 0.46514 | 0.552671 | 0.84382299 | 15 | 32177321 | 33484267 |
| beer-intake | PS | -0.0541697 | -0.62588 | 0.47598 | 0.00293436 | 0 | 0.45559 | 0.818023 | 0.944542385 | 15 | 33484268 | 34410072 |
| beer-intake | PS | -0.600064 | -1 | -0.09226 | 0.360076 | 0.01311 | 1 | 0.0260354 | 0.305371 | 15 | 34410073 | 35118927 |
| beer-intake | PS | 0.185308 | -0.34498 | 0.80767 | 0.0343391 | 0 | 0.66818 | 0.451002 | 0.786475108 | 15 | 37962916 | 39238840 |
| beer-intake | PS | -0.365972 | -0.77466 | -0.02477 | 0.133935 | 0.00236 | 0.6001 | 0.041894 | 0.35870143 | 15 | 39238841 | 40604780 |
| beer-intake | PS | -0.0769 | -0.64431 | 0.47124 | 0.00591361 | 0 | 0.50428 | 0.755759 | 0.923275238 | 15 | 46022643 | 46884071 |
| beer-intake | PS | -0.104758 | -0.59568 | 0.36759 | 0.0109742 | 0 | 0.37787 | 0.63391 | 0.872461045 | 15 | 46884072 | 47693316 |
| beer-intake | PS | 0.284402 | -0.23289 | 1 | 0.0808846 | 0 | 1 | 0.254731 | 0.642433549 | 15 | 47693317 | 49260006 |
| beer-intake | PS | 0.134082 | -0.25251 | 0.55226 | 0.017978 | 0 | 0.30634 | 0.481029 | 0.801960548 | 15 | 51605478 | 53263126 |
| beer-intake | PS | -0.282353 | -1 | 0.297 | 0.0797234 | 0 | 1 | 0.311224 | 0.694502407 | 15 | 57641165 | 58712954 |
| beer-intake | PS | 0.0119884 | -0.3369 | 0.3739 | 0.000143723 | 0 | 0.16923 | 0.94399 | 0.986696747 | 15 | 59901117 | 61130595 |
| beer-intake | PS | -0.167024 | -0.68757 | 0.2982 | 0.027897 | 0 | 0.47544 | 0.454999 | 0.790019529 | 15 | 61130596 | 62106138 |
| beer-intake | PS | 0.26719 | -0.10446 | 0.7233 | 0.0713906 | 0 | 0.52316 | 0.156562 | 0.564405174 | 15 | 62106139 | 63218978 |
| beer-intake | PS | 0.207169 | -0.37524 | 0.95245 | 0.0429189 | 0 | 0.95111 | 0.437908 | 0.7772867 | 15 | 66355635 | 67396520 |
| beer-intake | PS | 0.263957 | -0.19881 | 0.87558 | 0.0696734 | 0 | 0.7681 | 0.235628 | 0.624200355 | 15 | 69089816 | 70767983 |
| beer-intake | PS | 0.570088 | 0.04828 | 1 | 0.325 | 0.00647 | 1 | 0.0352804 | 0.342762835 | 15 | 70767984 | 72058129 |
| beer-intake | PS | 0.0286595 | -0.5725 | 0.6657 | 0.000821366 | 0 | 0.5813 | 0.913909 | 0.977166335 | 15 | 74458114 | 76401952 |
| beer-intake | PS | 0.604702 | -0.06676 | 1 | 0.365665 | 0 | 1 | 0.0834168 | 0.462902545 | 15 | 84209761 | 85494083 |
| beer-intake | PS | 0.343345 | -0.04373 | 0.81787 | 0.117886 | 0 | 0.66891 | 0.0866076 | 0.47064962 | 15 | 86341599 | 87158587 |
| beer-intake | PS | 0.164522 | -0.65389 | 1 | 0.0270674 | 0 | 1 | 0.625838 | 0.868930667 | 15 | 87158588 | 88035757 |
| beer-intake | PS | -0.229165 | -0.77997 | 0.193 | 0.0525167 | 0 | 0.61219 | 0.268276 | 0.653020309 | 15 | 89385188 | 90632718 |
| beer-intake | PS | -0.190505 | -1 | 0.82977 | 0.036292 | 0 | 1 | 0.631774 | 0.870590801 | 15 | 90632719 | 91593623 |
| beer-intake | PS | -0.147351 | -1 | 0.94089 | 0.0217122 | 0 | 1 | 0.715556 | 0.906613519 | 15 | 92675406 | 93707010 |
| beer-intake | PS | -0.18514 | -0.64196 | 0.21829 | 0.0342769 | 0 | 0.41304 | 0.354757 | 0.731000859 | 15 | 93707011 | 94565521 |
| beer-intake | PS | -0.124206 | -0.48093 | 0.23731 | 0.0154271 | 0 | 0.23296 | 0.471818 | 0.797472807 | 15 | 94565522 | 95662425 |
| beer-intake | PS | -0.0273907 | -0.68407 | 0.61033 | 0.000750249 | 0 | 0.63702 | 0.917598 | 0.977166335 | 15 | 95662426 | 96864278 |
| beer-intake | PS | -0.341798 | -0.9025 | 0.07899 | 0.116826 | 0 | 0.81451 | 0.109146 | 0.508421114 | 15 | 96864279 | 98025684 |
| beer-intake | PS | -0.598699 | -1 | 0.12163 | 0.35844 | 0 | 1 | 0.0993174 | 0.48639381 | 15 | 99925973 | 100742117 |
| beer-intake | PS | 0.186068 | -0.36436 | 0.85092 | 0.0346213 | 0 | 0.72824 | 0.464301 | 0.795179374 | 15 | 100742118 | 101550750 |
| beer-intake | PS | -0.496963 | -1 | 0.03805 | 0.246972 | 0 | 1 | 0.0663821 | 0.426779407 | 15 | 101550751 | 102520975 |
| beer-intake | PS | 0.555436 | -0.01384 | 1 | 0.308509 | 0 | 1 | 0.0598479 | 0.406350706 | 16 | 4816146 | 5782968 |
| beer-intake | PS | 0.0990888 | -0.63985 | 0.97204 | 0.00981858 | 0 | 1 | 0.7494 | 0.922454258 | 16 | 5782969 | 6446081 |
| beer-intake | PS | 0.0744359 | -0.61146 | 0.84719 | 0.00554071 | 0 | 0.87543 | 0.800258 | 0.940589196 | 16 | 7051430 | 7704354 |
| beer-intake | PS | 0.0264929 | -0.65193 | 0.75264 | 0.000701873 | 0 | 0.72145 | 0.924497 | 0.979690851 | 16 | 8341013 | 9104469 |
| beer-intake | PS | -0.18085 | -0.98114 | 0.41664 | 0.0327066 | 0 | 1 | 0.501565 | 0.814819138 | 16 | 9104470 | 9754796 |
| beer-intake | PS | 0.279284 | -0.19173 | 0.86276 | 0.0779993 | 0 | 0.74494 | 0.231032 | 0.622398612 | 16 | 9754797 | 10351808 |
| beer-intake | PS | 0.103 | -0.38616 | 0.62876 | 0.0106091 | 0 | 0.41202 | 0.64719 | 0.881452269 | 16 | 10351809 | 11022542 |
| beer-intake | PS | -0.565296 | -1 | 0.05959 | 0.319559 | 0 | 1 | 0.0732786 | 0.44650729 | 16 | 11916632 | 12793149 |
| beer-intake | PS | 0.287963 | -0.12483 | 0.80815 | 0.0829225 | 0 | 0.6531 | 0.170937 | 0.582296617 | 16 | 13893408 | 15921108 |
| beer-intake | PS | 0.304936 | -0.16224 | 0.90657 | 0.0929859 | 0 | 0.82327 | 0.180323 | 0.584639921 | 16 | 17343278 | 19104257 |
| beer-intake | PS | -0.203026 | -0.79729 | 0.29388 | 0.0412197 | 0 | 0.64214 | 0.391164 | 0.754395872 | 16 | 19104258 | 20351261 |
| beer-intake | PS | -0.355747 | -1 | 0.29216 | 0.126556 | 0 | 1 | 0.253359 | 0.640696318 | 16 | 24014706 | 25235251 |
| beer-intake | PS | -0.114 | -0.66542 | 0.37754 | 0.0129959 | 0 | 0.48447 | 0.614977 | 0.863358047 | 16 | 25235252 | 26154122 |
| beer-intake | PS | -0.0107585 | -0.48901 | 0.4589 | 0.000115745 | 0 | 0.34898 | 0.957244 | 0.990303547 | 16 | 26154123 | 27443061 |
| beer-intake | PS | 0.147219 | -0.23388 | 0.58719 | 0.0216735 | 0 | 0.34953 | 0.429395 | 0.772599009 | 16 | 27443062 | 29043177 |
| beer-intake | PS | -0.268205 | -0.75894 | 0.14805 | 0.071934 | 0 | 0.57645 | 0.196167 | 0.600448596 | 16 | 29043178 | 31384210 |
| beer-intake | PS | -0.12366 | -1 | 1 | 0.0152917 | 0 | 1 | 0.769894 | 0.92959111 | 16 | 35259454 | 49010761 |
| beer-intake | PS | 0.0327094 | -0.35376 | 0.44063 | 0.0010699 | 0 | 0.23855 | 0.85918 | 0.95628102 | 16 | 53393883 | 54866095 |
| beer-intake | PS | -0.649301 | -1 | -0.22085 | 0.421592 | 0.04927 | 1 | 0.00418202 | 0.178799682 | 16 | 54866096 | 55907389 |
| beer-intake | PS | -0.271644 | -1 | 0.56581 | 0.0737907 | 0 | 1 | 0.442595 | 0.78178219 | 16 | 58508979 | 59885499 |
| beer-intake | PS | 0.297716 | -0.15966 | 0.84194 | 0.0886348 | 0 | 0.71006 | 0.181404 | 0.586284077 | 16 | 59885500 | 61092844 |
| beer-intake | PS | 0.0464212 | -0.39948 | 0.51482 | 0.00215493 | 0 | 0.30168 | 0.82169 | 0.944550594 | 16 | 61092845 | 62607090 |
| beer-intake | PS | NA | NA | NA | NA | NA | NA | NA | NA | 16 | 62607091 | 64207176 |
| beer-intake | PS | -0.190444 | -0.82372 | 0.36284 | 0.0362688 | 0 | 0.6909 | 0.456334 | 0.790656151 | 16 | 65072404 | 65882820 |
| beer-intake | PS | 0.848152 | 0.2257 | 1 | 0.719363 | 0.05249 | 1 | 0.01026 | 0.24282 | 16 | 72089512 | 73140781 |
| beer-intake | PS | 0.292957 | -0.21622 | 1 | 0.085824 | 0 | 1 | 0.224494 | 0.620938095 | 16 | 73140782 | 74135275 |
| beer-intake | PS | -0.160818 | -1 | 0.51553 | 0.0258625 | 0 | 1 | 0.587724 | 0.855475038 | 16 | 76635468 | 77270665 |
| beer-intake | PS | 0.107504 | -0.76942 | 1 | 0.0116 | 0 | 1 | 0.765173 | 0.928671504 | 16 | 77270666 | 77739132 |
| beer-intake | PS | 0.192812 | -0.42951 | 1 | 0.0371765 | 0 | 1 | 0.494117 | 0.8109478 | 16 | 78280637 | 78973580 |
| beer-intake | PS | -0.148789 | -0.78899 | 0.43804 | 0.0221383 | 0 | 0.66902 | 0.561789 | 0.845152343 | 16 | 78973581 | 79662634 |
| beer-intake | PS | -0.0898398 | -0.89594 | 0.63826 | 0.0080712 | 0 | 0.99065 | 0.763575 | 0.928128647 | 16 | 79662635 | 80559685 |
| beer-intake | PS | -0.24346 | -0.79765 | 0.22094 | 0.059273 | 0 | 0.63987 | 0.279075 | 0.665298504 | 16 | 83077870 | 83778371 |
| beer-intake | PS | 0.505186 | -0.12486 | 1 | 0.255213 | 0 | 1 | 0.106372 | 0.502765488 | 16 | 84440155 | 85146805 |
| beer-intake | PS | -0.0035871 | -0.92794 | 0.91064 | 0.0000129 | 0 | 1 | 0.991542 | 0.998435708 | 16 | 85146806 | 86058597 |
| beer-intake | PS | 0.616426 | 0.17547 | 1 | 0.379981 | 0.03138 | 1 | 0.00890518 | 0.224487887 | 16 | 86058598 | 86748867 |
| beer-intake | PS | 0.431242 | -0.17346 | 1 | 0.18597 | 0 | 1 | 0.145807 | 0.54736283 | 16 | 86748868 | 87669168 |
| beer-intake | PS | -0.297494 | -0.7706 | 0.1028 | 0.0885028 | 0 | 0.59383 | 0.143883 | 0.545236775 | 16 | 87669169 | 88387228 |
| beer-intake | PS | 0.417299 | -0.15649 | 1 | 0.174138 | 0 | 1 | 0.144186 | 0.545236775 | 16 | 89106305 | 90292787 |
| beer-intake | PS | 0.185787 | -0.24806 | 0.69567 | 0.034517 | 0 | 0.48826 | 0.371727 | 0.744263178 | 17 | 52 | 815653 |
| beer-intake | PS | 0.267673 | -0.12247 | 0.70459 | 0.0716489 | 0 | 0.49645 | 0.166632 | 0.579193756 | 17 | 815654 | 1480056 |
| beer-intake | PS | 0.605811 | 0.08851 | 1 | 0.367007 | 0.01205 | 1 | 0.0270885 | 0.305371 | 17 | 1480057 | 2699135 |
| beer-intake | PS | 0.310981 | -0.29397 | 1 | 0.0967091 | 0 | 1 | 0.273645 | 0.65860322 | 17 | 4463972 | 5573784 |
| beer-intake | PS | 0.180004 | -0.30098 | 0.75171 | 0.0324016 | 0 | 0.57161 | 0.427044 | 0.772599009 | 17 | 5573785 | 6305078 |
| beer-intake | PS | 0.293254 | -0.11276 | 0.81306 | 0.0859979 | 0 | 0.66107 | 0.144809 | 0.545911712 | 17 | 6305079 | 7264458 |
| beer-intake | PS | -0.257273 | -0.7445 | 0.11487 | 0.0661895 | 0 | 0.55664 | 0.156898 | 0.564971189 | 17 | 7264459 | 8554763 |
| beer-intake | PS | 0.36988 | -0.10216 | 0.99345 | 0.136811 | 0 | 0.99248 | 0.113726 | 0.514474053 | 17 | 8554764 | 9619356 |
| beer-intake | PS | -0.133206 | -0.68845 | 0.37497 | 0.0177437 | 0 | 0.49603 | 0.574245 | 0.850562677 | 17 | 11778165 | 12676353 |
| beer-intake | PS | 0.201641 | -0.33859 | 0.85935 | 0.0406591 | 0 | 0.76498 | 0.431009 | 0.772599009 | 17 | 12676354 | 13648446 |
| beer-intake | PS | -0.0139624 | -0.586 | 0.54576 | 0.000194949 | 0 | 0.47138 | 0.955217 | 0.989305986 | 17 | 13648447 | 14508610 |
| beer-intake | PS | 0.20965 | -0.45877 | 1 | 0.0439532 | 0 | 1 | 0.491576 | 0.808809681 | 17 | 14508611 | 15308722 |
| beer-intake | PS | 0.445378 | -0.01552 | 1 | 0.198361 | 0 | 1 | 0.0565481 | 0.398030376 | 17 | 15308723 | 16405207 |
| beer-intake | PS | -0.323613 | -1 | 0.16968 | 0.104725 | 0 | 1 | 0.190054 | 0.596557161 | 17 | 18900979 | 20402494 |
| beer-intake | PS | -0.184139 | -0.53918 | 0.1122 | 0.033907 | 0 | 0.29095 | 0.204959 | 0.603996364 | 17 | 25872111 | 27344401 |
| beer-intake | PS | -0.108985 | -0.80696 | 0.48919 | 0.0118777 | 0 | 0.74296 | 0.674507 | 0.89679545 | 17 | 27344402 | 29783141 |
| beer-intake | PS | 0.578627 | 0.18842 | 1 | 0.334809 | 0.03572 | 1 | 0.00467438 | 0.186177135 | 17 | 29783142 | 31318753 |
| beer-intake | PS | -0.0275943 | -0.38748 | 0.33732 | 0.000761447 | 0 | 0.17633 | 0.874322 | 0.962309464 | 17 | 32356062 | 33614189 |
| beer-intake | PS | 0.0540582 | -0.40869 | 0.53026 | 0.00292229 | 0 | 0.32256 | 0.804045 | 0.941740696 | 17 | 33614190 | 34474611 |
| beer-intake | PS | 0.435804 | -0.07174 | 1 | 0.189925 | 0 | 1 | 0.0888402 | 0.478010038 | 17 | 34474612 | 36116884 |
| beer-intake | PS | -0.0622026 | -0.71411 | 0.56119 | 0.00386916 | 0 | 0.63107 | 0.813903 | 0.944542385 | 17 | 36116885 | 37361178 |
| beer-intake | PS | -0.131632 | -0.72083 | 0.39064 | 0.0173269 | 0 | 0.54338 | 0.588337 | 0.855475038 | 17 | 38880482 | 40233545 |
| beer-intake | PS | -0.247383 | -0.76835 | 0.2021 | 0.0611985 | 0 | 0.59091 | 0.258555 | 0.643628529 | 17 | 40233546 | 42348003 |
| beer-intake | PS | -0.430565 | -1 | 0.07953 | 0.185386 | 0 | 1 | 0.0953608 | 0.482879102 | 17 | 45883902 | 47516224 |
| beer-intake | PS | -0.1139 | -0.71089 | 0.42071 | 0.0129732 | 0 | 0.54049 | 0.638459 | 0.873870499 | 17 | 47516225 | 48722590 |
| beer-intake | PS | -0.109844 | -0.86351 | 0.55802 | 0.0120657 | 0 | 0.92745 | 0.701266 | 0.903972224 | 17 | 52102650 | 53468006 |
| beer-intake | PS | 0.273173 | -0.31375 | 1 | 0.0746235 | 0 | 1 | 0.329434 | 0.708397335 | 17 | 54950108 | 56245227 |
| beer-intake | PS | 0.292844 | -0.38567 | 1 | 0.0857575 | 0 | 1 | 0.343021 | 0.71676685 | 17 | 56245228 | 58652809 |
| beer-intake | PS | -0.406683 | -1 | 0.28471 | 0.165391 | 0 | 1 | 0.225343 | 0.620938095 | 17 | 58652810 | 60453120 |
| beer-intake | PS | -0.053511 | -0.90206 | 0.76909 | 0.00286343 | 0 | 1 | 0.864915 | 0.958635788 | 17 | 64438388 | 65582327 |
| beer-intake | PS | 0.80519 | 0.3222 | 1 | 0.648331 | 0.10381 | 1 | 0.00130014 | 0.12172382 | 17 | 65582328 | 66757556 |
| beer-intake | PS | 0.66779 | 0.14861 | 1 | 0.445944 | 0.02373 | 1 | 0.0147651 | 0.271222952 | 17 | 66757557 | 68176219 |
| beer-intake | PS | 0.0652218 | -0.32835 | 0.49405 | 0.00425388 | 0 | 0.26128 | 0.731067 | 0.915496478 | 17 | 70495120 | 71466953 |
| beer-intake | PS | 0.243749 | -0.31919 | 1 | 0.0594135 | 0 | 1 | 0.373767 | 0.744326334 | 17 | 72383473 | 73741321 |
| beer-intake | PS | 0.153934 | -0.33326 | 0.73862 | 0.0236955 | 0 | 0.55666 | 0.517896 | 0.822603387 | 17 | 74908267 | 75619256 |
| beer-intake | PS | -0.22555 | -0.57019 | 0.07903 | 0.0508729 | 0 | 0.32512 | 0.15013 | 0.55216732 | 17 | 75619257 | 76596287 |
| beer-intake | PS | 0.230868 | -0.06107 | 0.55101 | 0.0533 | 0 | 0.30361 | 0.121938 | 0.523323926 | 17 | 77412787 | 78438332 |
| beer-intake | PS | 0.0988195 | -0.28677 | 0.48887 | 0.00976529 | 0 | 0.252 | 0.592303 | 0.855748335 | 17 | 79333775 | 80459149 |
| beer-intake | PS | -0.228863 | -0.85251 | 0.28643 | 0.0523785 | 0 | 0.73373 | 0.350804 | 0.726522425 | 17 | 80459150 | 81192460 |
| beer-intake | PS | 0.621164 | 0.05834 | 1 | 0.385845 | 0.00854 | 1 | 0.0354727 | 0.342762835 | 18 | 1940212 | 2839842 |
| beer-intake | PS | -0.315982 | -0.96939 | 0.17733 | 0.0998446 | 0 | 0.94005 | 0.19208 | 0.596891798 | 18 | 2839843 | 3722828 |
| beer-intake | PS | 0.46761 | -0.19537 | 1 | 0.21866 | 0 | 1 | 0.149411 | 0.55216732 | 18 | 3722829 | 4603961 |
| beer-intake | PS | 0.404073 | -0.03905 | 1 | 0.163275 | 0 | 1 | 0.0765491 | 0.453737497 | 18 | 5575813 | 6756496 |
| beer-intake | PS | -0.0073788 | -0.67105 | 0.63033 | 0.0000544 | 0 | 0.66009 | 0.977489 | 0.996093315 | 18 | 6756497 | 7862479 |
| beer-intake | PS | -0.039829 | -0.40895 | 0.33703 | 0.00158635 | 0 | 0.19114 | 0.820416 | 0.944542385 | 18 | 8788525 | 9816164 |
| beer-intake | PS | -0.366612 | -1 | 0.1261 | 0.134404 | 0 | 1 | 0.132822 | 0.538133195 | 18 | 9816165 | 10675548 |
| beer-intake | PS | 0.200638 | -0.04505 | 0.45215 | 0.0402555 | 0 | 0.20444 | 0.110343 | 0.508421114 | 18 | 12735559 | 13641479 |
| beer-intake | PS | 0.759327 | 0.20921 | 1 | 0.576578 | 0.04431 | 1 | 0.0100096 | 0.2403776 | 18 | 15220935 | 20009696 |
| beer-intake | PS | 0.186717 | -0.24948 | 0.69749 | 0.0348634 | 0 | 0.48878 | 0.373595 | 0.744326334 | 18 | 20009697 | 21622716 |
| beer-intake | PS | -0.606465 | -1 | -0.00688 | 0.3678 | 0.00607 | 1 | 0.0505987 | 0.375723306 | 18 | 21622717 | 22746153 |
| beer-intake | PS | 0.148029 | -0.45507 | 0.83248 | 0.0219125 | 0 | 0.7518 | 0.581112 | 0.85428452 | 18 | 24088164 | 25305260 |
| beer-intake | PS | -1 | -1 | -0.47681 | 1 | 0.22735 | 1 | 0.000261676 | 0.05598169 | 18 | 25305261 | 26861067 |
| beer-intake | PS | 0.062701 | -0.56858 | 0.71613 | 0.00393142 | 0 | 0.64641 | 0.819715 | 0.944542385 | 18 | 27823156 | 28792734 |
| beer-intake | PS | 0.181202 | -0.62565 | 1 | 0.0328341 | 0 | 1 | 0.598558 | 0.857784304 | 18 | 32458908 | 34153297 |
| beer-intake | PS | 0.483099 | -0.06506 | 1 | 0.233385 | 0 | 1 | 0.0815025 | 0.460358212 | 18 | 34153298 | 36056932 |
| beer-intake | PS | -0.56082 | -1 | 0.11153 | 0.314519 | 0 | 1 | 0.0970771 | 0.483313733 | 18 | 41425455 | 42974165 |
| beer-intake | PS | -0.242476 | -0.8542 | 0.23836 | 0.0587945 | 0 | 0.73337 | 0.304021 | 0.687150579 | 18 | 42974166 | 44300145 |
| beer-intake | PS | -0.194925 | -0.57698 | 0.15542 | 0.0379958 | 0 | 0.3329 | 0.268894 | 0.653020309 | 18 | 45718493 | 46558306 |
| beer-intake | PS | 0.347629 | -0.19231 | 1 | 0.120846 | 0 | 1 | 0.191906 | 0.596891798 | 18 | 52512524 | 53762996 |
| beer-intake | PS | 0.449105 | -0.13593 | 1 | 0.201696 | 0 | 1 | 0.13211 | 0.53799409 | 18 | 53762997 | 54957867 |
| beer-intake | PS | -0.495747 | -1 | 0.14051 | 0.245765 | 0 | 1 | 0.11488 | 0.516275157 | 18 | 56832313 | 57635821 |
| beer-intake | PS | -0.082071 | -0.54161 | 0.35852 | 0.00673566 | 0 | 0.31164 | 0.696719 | 0.903824643 | 18 | 57635822 | 58527236 |
| beer-intake | PS | 0.215329 | -0.3443 | 0.9292 | 0.0463664 | 0 | 0.873 | 0.414614 | 0.767893591 | 18 | 58527237 | 59449422 |
| beer-intake | PS | 0.139847 | -0.32564 | 0.65464 | 0.0195572 | 0 | 0.43903 | 0.531705 | 0.830884464 | 18 | 60780195 | 62074993 |
| beer-intake | PS | 0.417971 | -0.24201 | 1 | 0.1747 | 0 | 1 | 0.184079 | 0.58903045 | 18 | 64253144 | 65294195 |
| beer-intake | PS | -0.129885 | -0.49953 | 0.20753 | 0.0169 | 0 | 0.25013 | 0.454733 | 0.790019529 | 18 | 65294196 | 66407960 |
| beer-intake | PS | -0.142194 | -0.74646 | 0.40107 | 0.0202191 | 0 | 0.57968 | 0.565238 | 0.846061641 | 18 | 71491861 | 72785206 |
| beer-intake | PS | 0.138912 | -0.49851 | 0.92925 | 0.0192966 | 0 | 0.92363 | 0.63058 | 0.870445596 | 18 | 74471746 | 75240760 |
| beer-intake | PS | 0.0408764 | -0.65977 | 0.7799 | 0.00167088 | 0 | 0.84198 | 0.885923 | 0.968348232 | 18 | 77148138 | 78017072 |
| beer-intake | PS | -0.406915 | -1 | 0.11361 | 0.165579 | 0 | 1 | 0.124507 | 0.529478987 | 19 | 64705 | 762046 |
| beer-intake | PS | 0.341724 | -0.14904 | 1 | 0.116775 | 0 | 1 | 0.163187 | 0.574566392 | 19 | 762047 | 1515920 |
| beer-intake | PS | -0.00479457 | -0.45911 | 0.4574 | 0.000023 | 0 | 0.29206 | 0.981381 | 0.996292185 | 19 | 1515921 | 2253174 |
| beer-intake | PS | -0.0242442 | -0.61578 | 0.54353 | 0.000587779 | 0 | 0.55366 | 0.915228 | 0.977166335 | 19 | 2253175 | 3085446 |
| beer-intake | PS | -0.124145 | -0.48463 | 0.21258 | 0.015412 | 0 | 0.23638 | 0.446601 | 0.785037065 | 19 | 3085447 | 3893909 |
| beer-intake | PS | 0.192727 | -0.22575 | 0.68202 | 0.0371437 | 0 | 0.46812 | 0.337579 | 0.714479806 | 19 | 3893910 | 4741718 |
| beer-intake | PS | 0.0532257 | -0.59953 | 0.73679 | 0.00283297 | 0 | 0.77299 | 0.844706 | 0.951069107 | 19 | 4741719 | 5478684 |
| beer-intake | PS | -0.486281 | -1 | -0.09608 | 0.236469 | 0.01021 | 1 | 0.0179142 | 0.283368889 | 19 | 6455429 | 7249359 |
| beer-intake | PS | -0.644385 | -1 | -0.00901 | 0.415233 | 0.00604 | 1 | 0.0480017 | 0.372383734 | 19 | 7249360 | 8199016 |
| beer-intake | PS | -0.0431318 | -0.73324 | 0.62061 | 0.00186036 | 0 | 0.74368 | 0.87706 | 0.964089793 | 19 | 8199017 | 9105577 |
| beer-intake | PS | 0.288 | -0.11032 | 0.91336 | 0.082944 | 0 | 0.83423 | 0.142047 | 0.544689833 | 19 | 10028841 | 11681978 |
| beer-intake | PS | -0.19559 | -0.82701 | 0.32219 | 0.0382555 | 0 | 0.68806 | 0.433898 | 0.774360938 | 19 | 14891101 | 15650185 |
| beer-intake | PS | 0.815628 | 0.28431 | 1 | 0.665249 | 0.08087 | 1 | 0.0041219 | 0.178799682 | 19 | 17750519 | 18504867 |
| beer-intake | PS | 0.586808 | 0.08137 | 1 | 0.344344 | 0.0101 | 1 | 0.0245892 | 0.304892234 | 19 | 18504868 | 19749166 |
| beer-intake | PS | -0.503411 | -1 | 0.16975 | 0.253422 | 0 | 1 | 0.126244 | 0.529965172 | 19 | 21822654 | 22729408 |
| beer-intake | PS | -0.534374 | -1 | 0.15677 | 0.285555 | 0 | 1 | 0.12538 | 0.529965172 | 19 | 29389091 | 30375792 |
| beer-intake | PS | -0.167333 | -0.84683 | 0.34949 | 0.028 | 0 | 0.75837 | 0.487884 | 0.805889628 | 19 | 30375793 | 31763008 |
| beer-intake | PS | -0.231392 | -0.83176 | 0.25866 | 0.0535 | 0 | 0.6936 | 0.332683 | 0.71108814 | 19 | 31763009 | 33028099 |
| beer-intake | PS | -0.913693 | -1 | -0.38159 | 0.834835 | 0.14561 | 1 | 0.00131479 | 0.12172382 | 19 | 33028100 | 33785835 |
| beer-intake | PS | 0.144799 | -0.32645 | 0.68712 | 0.0209669 | 0 | 0.48718 | 0.515608 | 0.822603387 | 19 | 33785836 | 34633274 |
| beer-intake | PS | -0.0650586 | -0.35155 | 0.20785 | 0.00423262 | 0 | 0.12621 | 0.639843 | 0.874362861 | 19 | 35649344 | 36638122 |
| beer-intake | PS | 0.144973 | -0.21454 | 0.52439 | 0.0210172 | 0 | 0.27723 | 0.420007 | 0.767893591 | 19 | 40171414 | 41004105 |
| beer-intake | PS | -0.00411166 | -0.93268 | 0.93918 | 0.0000169 | 0 | 1 | 0.990363 | 0.998310357 | 19 | 41004106 | 41733463 |
| beer-intake | PS | 0.00776031 | -0.39414 | 0.41491 | 0.0000602 | 0 | 0.22057 | 0.967452 | 0.992684493 | 19 | 45040933 | 45893307 |
| beer-intake | PS | -0.25582 | -1 | 0.33468 | 0.0654438 | 0 | 1 | 0.354086 | 0.730540035 | 19 | 45893308 | 46765060 |
| beer-intake | PS | 0.683275 | 0.31003 | 1 | 0.466864 | 0.09612 | 1 | 0.000872711 | 0.114010965 | 19 | 48573066 | 49415189 |
| beer-intake | PS | 0.135166 | -0.78593 | 1 | 0.0182698 | 0 | 1 | 0.703009 | 0.903972224 | 19 | 49415190 | 50451925 |
| beer-intake | PS | -0.00818114 | -0.37711 | 0.35461 | 0.0000669 | 0 | 0.18128 | 0.962324 | 0.991317435 | 19 | 51259179 | 51903804 |
| beer-intake | PS | 0.56932 | 0.16554 | 1 | 0.324125 | 0.02775 | 1 | 0.00741159 | 0.206250391 | 19 | 52678749 | 53431217 |
| beer-intake | PS | -0.105767 | -0.46646 | 0.24382 | 0.0111866 | 0 | 0.22214 | 0.543156 | 0.838940829 | 19 | 53431218 | 54042240 |
| beer-intake | PS | -0.160966 | -0.56761 | 0.23618 | 0.02591 | 0 | 0.32344 | 0.401649 | 0.761780275 | 19 | 54042241 | 54602370 |
| beer-intake | PS | -0.390177 | -0.99076 | 0.05767 | 0.152238 | 0 | 0.9816 | 0.0837459 | 0.463097836 | 19 | 54602371 | 55182973 |
| beer-intake | PS | 0.879786 | 0.36924 | 1 | 0.774023 | 0.13634 | 1 | 0.0013859 | 0.122333768 | 19 | 55182974 | 55714085 |
| beer-intake | PS | 0.141314 | -0.23013 | 0.54826 | 0.0199695 | 0 | 0.30379 | 0.434366 | 0.774360938 | 19 | 55714086 | 56411086 |
| beer-intake | PS | 0.316624 | -0.23248 | 1 | 0.100251 | 0 | 1 | 0.228069 | 0.620938095 | 19 | 56411087 | 57143509 |
| beer-intake | PS | -0.140479 | -0.79053 | 0.42861 | 0.0197343 | 0 | 0.67148 | 0.588905 | 0.855475038 | 19 | 57959953 | 59118811 |
| beer-intake | PS | 0.066338 | -1 | 1 | 0.00440073 | 0 | 1 | 0.868914 | 0.959389156 | 20 | 2668109 | 3736551 |
| beer-intake | PS | 0.505517 | 0.00177 | 1 | 0.255548 | 0.00503 | 1 | 0.0490705 | 0.373576347 | 20 | 3736552 | 4591847 |
| beer-intake | PS | 0.501723 | -0.05627 | 1 | 0.251726 | 0 | 1 | 0.0853282 | 0.468372943 | 20 | 5379451 | 6128358 |
| beer-intake | PS | -0.676339 | -1 | -0.14184 | 0.457434 | 0.02358 | 1 | 0.0174767 | 0.283368889 | 20 | 6128359 | 7231796 |
| beer-intake | PS | -0.135698 | -1 | 0.68592 | 0.0184139 | 0 | 1 | 0.689848 | 0.900892552 | 20 | 9279551 | 10279603 |
| beer-intake | PS | -0.055288 | -0.66287 | 0.48403 | 0.00305676 | 0 | 0.50144 | 0.824319 | 0.944640651 | 20 | 10279604 | 11257012 |
| beer-intake | PS | 0.23068 | -0.25814 | 0.92401 | 0.0532132 | 0 | 0.86632 | 0.335356 | 0.713246439 | 20 | 12353962 | 13202335 |
| beer-intake | PS | 0.528149 | 0.06408 | 1 | 0.278941 | 0.00736 | 1 | 0.028965 | 0.316086746 | 20 | 15238520 | 15962576 |
| beer-intake | PS | 0.195662 | -0.55114 | 1 | 0.0382836 | 0 | 1 | 0.554147 | 0.843974883 | 20 | 18959420 | 19957928 |
| beer-intake | PS | -0.145195 | -1 | 0.58127 | 0.0210816 | 0 | 1 | 0.64496 | 0.879711759 | 20 | 23808563 | 24487128 |
| beer-intake | PS | -0.38575 | -0.77804 | -0.04957 | 0.148803 | 0.00396 | 0.60535 | 0.0265177 | 0.305371 | 20 | 38427595 | 40272390 |
| beer-intake | PS | -0.211269 | -1 | 0.38425 | 0.0446344 | 0 | 1 | 0.438758 | 0.777949852 | 20 | 40272391 | 41351514 |
| beer-intake | PS | -0.455567 | -1 | -0.04325 | 0.207541 | 0.00452 | 1 | 0.0334627 | 0.335242878 | 20 | 41351515 | 42185671 |
| beer-intake | PS | -0.331401 | -0.84019 | 0.09047 | 0.109827 | 0 | 0.70592 | 0.116227 | 0.516275157 | 20 | 42185672 | 43008890 |
| beer-intake | PS | -0.0612394 | -0.50896 | 0.35739 | 0.00375027 | 0 | 0.27802 | 0.75948 | 0.925890885 | 20 | 43008891 | 44072210 |
| beer-intake | PS | 0.590576 | 0.21995 | 1 | 0.34878 | 0.04905 | 1 | 0.00349086 | 0.172744678 | 20 | 46486133 | 47203836 |
| beer-intake | PS | 0.112045 | -0.14174 | 0.37746 | 0.012554 | 0 | 0.14308 | 0.390375 | 0.754395872 | 20 | 48212976 | 49236418 |
| beer-intake | PS | 0.0666707 | -0.27411 | 0.40489 | 0.00444498 | 0 | 0.17239 | 0.685953 | 0.900246853 | 20 | 49236419 | 50653620 |
| beer-intake | PS | 0.13301 | -0.45113 | 0.85918 | 0.0176917 | 0 | 0.79947 | 0.607544 | 0.861157059 | 20 | 50653621 | 51533750 |
| beer-intake | PS | 0.383695 | -0.03794 | 1 | 0.147222 | 0 | 1 | 0.0839418 | 0.463097836 | 20 | 51533751 | 52411532 |
| beer-intake | PS | -0.0993094 | -0.75658 | 0.51741 | 0.00986236 | 0 | 0.65952 | 0.711176 | 0.906057359 | 20 | 52411533 | 53120334 |
| beer-intake | PS | 0.864073 | 0.22752 | 1 | 0.746622 | 0.05354 | 1 | 0.011637 | 0.251698291 | 20 | 53120335 | 53879803 |
| beer-intake | PS | -0.194689 | -0.75231 | 0.29555 | 0.0379038 | 0 | 0.57442 | 0.410331 | 0.76747083 | 20 | 53879804 | 54743694 |
| beer-intake | PS | 0.255156 | -0.36571 | 1 | 0.0651048 | 0 | 1 | 0.376901 | 0.744326334 | 20 | 54743695 | 55448075 |
| beer-intake | PS | -0.595342 | -1 | -0.06073 | 0.354432 | 0.00825 | 1 | 0.0306167 | 0.318452682 | 20 | 57924038 | 58780894 |
| beer-intake | PS | -0.0793003 | -0.46759 | 0.30378 | 0.00628854 | 0 | 0.23135 | 0.665464 | 0.893302681 | 20 | 58780895 | 59560457 |
| beer-intake | PS | 0.095361 | -0.30885 | 0.52195 | 0.00909372 | 0 | 0.2819 | 0.62152 | 0.867717579 | 20 | 61470769 | 62179241 |
| beer-intake | PS | 0.291033 | -0.20112 | 0.93929 | 0.0847003 | 0 | 0.88869 | 0.223553 | 0.620938095 | 21 | 15840034 | 16873443 |
| beer-intake | PS | 0.482271 | 0.0376 | 1 | 0.232585 | 0.00529 | 1 | 0.0378666 | 0.351281893 | 21 | 21632917 | 22201890 |
| beer-intake | PS | 0.104859 | -0.50217 | 0.80566 | 0.0109954 | 0 | 0.70663 | 0.693955 | 0.903330821 | 21 | 24055942 | 25247986 |
| beer-intake | PS | 0.0549652 | -0.57008 | 0.73998 | 0.00302117 | 0 | 0.65378 | 0.840656 | 0.949371541 | 21 | 25247987 | 26467826 |
| beer-intake | PS | -0.820309 | -1 | -0.17653 | 0.672907 | 0.03527 | 1 | 0.0172297 | 0.283368889 | 21 | 26467827 | 27774350 |
| beer-intake | PS | 0.413691 | 0.01842 | 0.91305 | 0.17114 | 0.00249 | 0.83365 | 0.0423717 | 0.35870143 | 21 | 32202240 | 33270272 |
| beer-intake | PS | 0.898429 | 0.45238 | 1 | 0.807174 | 0.20465 | 1 | 0.000258631 | 0.05598169 | 21 | 33270273 | 34383794 |
| beer-intake | PS | -0.266874 | -0.95715 | 0.24246 | 0.0712217 | 0 | 0.92347 | 0.28275 | 0.668934463 | 21 | 34383795 | 35729261 |
| beer-intake | PS | 0.273232 | -0.32363 | 1 | 0.0746557 | 0 | 1 | 0.327063 | 0.706605148 | 21 | 37303549 | 38046449 |
| beer-intake | PS | -0.106078 | -0.49868 | 0.27694 | 0.0112525 | 0 | 0.25678 | 0.559623 | 0.844653041 | 21 | 39252060 | 40480831 |
| beer-intake | PS | -0.429491 | -1 | 0.27469 | 0.184463 | 0 | 1 | 0.210445 | 0.608744827 | 21 | 40480832 | 41344742 |
| beer-intake | PS | 0.112491 | -0.2398 | 0.49822 | 0.0126542 | 0 | 0.25031 | 0.511593 | 0.822603387 | 21 | 41344743 | 42187152 |
| beer-intake | PS | 0.239565 | -0.05557 | 0.57587 | 0.0573913 | 0 | 0.33162 | 0.118057 | 0.518364615 | 21 | 42187153 | 43081434 |
| beer-intake | PS | 0.134016 | -0.53618 | 0.95331 | 0.0179604 | 0 | 1 | 0.644389 | 0.879471155 | 21 | 43081435 | 43812791 |
| beer-intake | PS | 0.253286 | -0.48671 | 1 | 0.0641537 | 0 | 1 | 0.438249 | 0.777469437 | 21 | 43812792 | 44815008 |
| beer-intake | PS | -0.183966 | -0.87379 | 0.38759 | 0.0338434 | 0 | 0.78005 | 0.484372 | 0.803432683 | 22 | 16050213 | 17587474 |
| beer-intake | PS | 0.0579709 | -0.41447 | 0.53185 | 0.00336062 | 0 | 0.33416 | 0.786116 | 0.933113527 | 22 | 17587475 | 18535225 |
| beer-intake | PS | 0.0506225 | -0.41912 | 0.5556 | 0.00256264 | 0 | 0.34535 | 0.818504 | 0.944542385 | 22 | 18535226 | 19635654 |
| beer-intake | PS | 0.220884 | -0.41474 | 1 | 0.0487899 | 0 | 1 | 0.44103 | 0.779861386 | 22 | 23143365 | 23950732 |
| beer-intake | PS | -0.207043 | -1 | 0.46261 | 0.0428666 | 0 | 1 | 0.496679 | 0.811076807 | 22 | 23950733 | 25282436 |
| beer-intake | PS | 0.371886 | 0.03724 | 0.77185 | 0.138299 | 0.00309 | 0.59575 | 0.0327992 | 0.333713979 | 22 | 25282437 | 26166934 |
| beer-intake | PS | -0.0505302 | -0.98643 | 0.79255 | 0.00255331 | 0 | 1 | 0.878454 | 0.964594882 | 22 | 32662294 | 33501725 |
| beer-intake | PS | -0.145621 | -0.59212 | 0.26798 | 0.0212056 | 0 | 0.35311 | 0.46428 | 0.795179374 | 22 | 35368342 | 36135968 |
| beer-intake | PS | 0.49826 | -0.02951 | 1 | 0.248263 | 0 | 1 | 0.064376 | 0.420504032 | 22 | 36135969 | 37364004 |
| beer-intake | PS | 0.230054 | -0.23591 | 0.92521 | 0.0529248 | 0 | 0.8739 | 0.297763 | 0.68293115 | 22 | 37364005 | 38718589 |
| beer-intake | PS | 0.077993 | -0.46663 | 0.66732 | 0.00608291 | 0 | 0.50414 | 0.75338 | 0.923275238 | 22 | 38718590 | 40378783 |
| beer-intake | PS | 0.0405619 | -0.34901 | 0.42636 | 0.00164527 | 0 | 0.20941 | 0.826195 | 0.945132354 | 22 | 42867928 | 43574017 |
| beer-intake | PS | -0.0157489 | -0.40258 | 0.37523 | 0.000248027 | 0 | 0.20061 | 0.931753 | 0.981625675 | 22 | 44409534 | 45170649 |
| beer-intake | PS | 0.594076 | 0.18374 | 1 | 0.352927 | 0.03379 | 1 | 0.00592409 | 0.200879756 | 22 | 47299626 | 48269177 |
| beer-intake | PS | 0.12406 | -1 | 1 | 0.015391 | 0 | 1 | 0.764609 | 0.928331968 | 22 | 48269178 | 48977538 |
| beer-intake | PS | 0.365507 | -0.27741 | 1 | 0.133596 | 0 | 1 | 0.23134 | 0.622398612 | 22 | 49559208 | 50347996 |
| beer-intake | PS | 0.0979944 | -0.28592 | 0.50829 | 0.0096029 | 0 | 0.26755 | 0.591946 | 0.855748335 | 22 | 50347997 | 51244236 |

| **Supplementary Table 2.The result of local genetic correlation analysis(psoriasis vs cheese intake)** | | | | | | | | | | | | |
| --- | --- | --- | --- | --- | --- | --- | --- | --- | --- | --- | --- | --- |
| phen1 | phen2 | log2FoldChange | rho.lower | rho.upper | r2 | r2.lower | r2.upper | p | padj | CHR | START | STOP |
| cheese-intake | PS | -0.0461133 | -0.56329 | 0.45899 | 0.00212644 | 0 | 0.3867 | 0.839691 | 0.949371541 | 1 | 1376205 | 2215495 |
| cheese-intake | PS | -0.220729 | -0.61987 | 0.13489 | 0.0487211 | 0 | 0.38424 | 0.214679 | 0.611283011 | 1 | 2983520 | 3582047 |
| cheese-intake | PS | 0.124871 | -0.27622 | 0.5485 | 0.0155928 | 0 | 0.30486 | 0.520109 | 0.822603387 | 1 | 3582048 | 4281476 |
| cheese-intake | PS | -0.479047 | -1 | 0.07159 | 0.229486 | 0 | 1 | 0.0784968 | 0.457283004 | 1 | 4773404 | 5362404 |
| cheese-intake | PS | -0.635743 | -1 | -0.10146 | 0.404169 | 0.01533 | 1 | 0.0213616 | 0.292402657 | 1 | 6136815 | 7711794 |
| cheese-intake | PS | -0.188282 | -0.65609 | 0.22969 | 0.03545 | 0 | 0.43225 | 0.361368 | 0.736563478 | 1 | 7711795 | 8580987 |
| cheese-intake | PS | -0.388622 | -1 | 0.03574 | 0.151027 | 0 | 1 | 0.0691294 | 0.436705262 | 1 | 8580988 | 9475966 |
| cheese-intake | PS | 0.272495 | -0.10262 | 0.70175 | 0.0742537 | 0 | 0.49246 | 0.142758 | 0.545236775 | 1 | 10753428 | 11709173 |
| cheese-intake | PS | 0.133112 | -0.22056 | 0.52835 | 0.0177189 | 0 | 0.2835 | 0.451272 | 0.786475108 | 1 | 11709174 | 13481025 |
| cheese-intake | PS | -0.28546 | -1 | 0.29239 | 0.0814873 | 0 | 1 | 0.291169 | 0.67501725 | 1 | 13481026 | 14720131 |
| cheese-intake | PS | 0.317206 | -0.2512 | 1 | 0.10062 | 0 | 1 | 0.24712 | 0.637199691 | 1 | 14720132 | 15755230 |
| cheese-intake | PS | 0.189013 | -0.68398 | 1 | 0.0357259 | 0 | 1 | 0.596559 | 0.856751476 | 1 | 16732169 | 17557746 |
| cheese-intake | PS | 0.44121 | -0.01453 | 1 | 0.194667 | 0 | 1 | 0.0558251 | 0.393790014 | 1 | 17557747 | 18427820 |
| cheese-intake | PS | 0.432931 | 0.01929 | 1 | 0.187429 | 0.00322 | 1 | 0.0398521 | 0.353687388 | 1 | 18427821 | 19238924 |
| cheese-intake | PS | 0.137543 | -0.22044 | 0.50644 | 0.018918 | 0 | 0.25793 | 0.427796 | 0.772599009 | 1 | 19238925 | 20556202 |
| cheese-intake | PS | -0.00422105 | -0.55825 | 0.57497 | 0.0000178 | 0 | 0.43693 | 0.986546 | 0.998059082 | 1 | 21416122 | 22145629 |
| cheese-intake | PS | -0.612159 | -1 | -0.09539 | 0.374739 | 0.01262 | 1 | 0.0253518 | 0.305371 | 1 | 22145630 | 22740287 |
| cheese-intake | PS | 0.3598 | 0.05978 | 0.69269 | 0.129456 | 0.00465 | 0.47982 | 0.0207809 | 0.292402657 | 1 | 22740288 | 23907045 |
| cheese-intake | PS | -0.219511 | -0.78242 | 0.16367 | 0.048185 | 0 | 0.61717 | 0.248922 | 0.637715318 | 1 | 23907046 | 25885138 |
| cheese-intake | PS | -0.0953073 | -0.7583 | 0.47447 | 0.00908347 | 0 | 0.6359 | 0.714458 | 0.906613519 | 1 | 25885139 | 27992665 |
| cheese-intake | PS | 0.505258 | -0.13129 | 1 | 0.255285 | 0 | 1 | 0.120258 | 0.518850788 | 1 | 27992666 | 29188426 |
| cheese-intake | PS | 0.574337 | 0.02013 | 1 | 0.329863 | 0.00542 | 1 | 0.0465082 | 0.366783605 | 1 | 30405183 | 31639217 |
| cheese-intake | PS | -0.0315034 | -0.8674 | 0.76218 | 0.000992462 | 0 | 1 | 0.920357 | 0.978662428 | 1 | 33066847 | 34371022 |
| cheese-intake | PS | 0.162237 | -0.2172 | 0.56944 | 0.0263208 | 0 | 0.32471 | 0.392417 | 0.754486297 | 1 | 34371023 | 35201626 |
| cheese-intake | PS | -0.508961 | -0.90285 | -0.18219 | 0.259041 | 0.03319 | 0.81514 | 0.00305143 | 0.167709644 | 1 | 36855140 | 38474036 |
| cheese-intake | PS | 0.20238 | -0.14266 | 0.57609 | 0.0409577 | 0 | 0.33188 | 0.233786 | 0.622973542 | 1 | 38474037 | 40200950 |
| cheese-intake | PS | -0.121466 | -0.60869 | 0.32419 | 0.014754 | 0 | 0.3825 | 0.570484 | 0.849106435 | 1 | 40200951 | 41093875 |
| cheese-intake | PS | 0.33571 | -0.07782 | 0.85088 | 0.112701 | 0 | 0.72501 | 0.107446 | 0.506376098 | 1 | 41093876 | 41977966 |
| cheese-intake | PS | -0.288815 | -0.7889 | 0.13888 | 0.0834141 | 0 | 0.62236 | 0.161909 | 0.574093371 | 1 | 41977967 | 43512669 |
| cheese-intake | PS | -0.171579 | -0.84468 | 0.41114 | 0.0294393 | 0 | 0.72815 | 0.518074 | 0.822603387 | 1 | 43512670 | 45167235 |
| cheese-intake | PS | -0.00407867 | -0.70845 | 0.67756 | 0.0000166 | 0 | 0.73227 | 0.988588 | 0.998310357 | 1 | 48105234 | 49185414 |
| cheese-intake | PS | -0.331586 | -1 | 0.43718 | 0.109949 | 0 | 1 | 0.344765 | 0.719030964 | 1 | 54771294 | 55727134 |
| cheese-intake | PS | 0.000408546 | -0.58368 | 0.59764 | 0.000000167 | 0 | 0.53847 | 0.998635 | 0.999859568 | 1 | 64344227 | 65894184 |
| cheese-intake | PS | -0.243226 | -0.6467 | 0.12551 | 0.0591591 | 0 | 0.41822 | 0.193919 | 0.59918586 | 1 | 65894185 | 66778015 |
| cheese-intake | PS | -0.159631 | -0.3878 | 0.06074 | 0.025482 | 0 | 0.15039 | 0.160873 | 0.574093371 | 1 | 66778016 | 67761890 |
| cheese-intake | PS | 0.184326 | -0.03809 | 0.41738 | 0.0339761 | 0 | 0.1742 | 0.10048 | 0.489802507 | 1 | 67761891 | 68633860 |
| cheese-intake | PS | 0.00569494 | -0.55758 | 0.55332 | 0.0000324 | 0 | 0.43972 | 0.981528 | 0.996292185 | 1 | 68633861 | 69438909 |
| cheese-intake | PS | -0.0766172 | -0.48417 | 0.32088 | 0.0058702 | 0 | 0.24855 | 0.683644 | 0.900136915 | 1 | 69438910 | 70992905 |
| cheese-intake | PS | -0.346068 | -1 | 0.16972 | 0.119763 | 0 | 1 | 0.177278 | 0.582296617 | 1 | 76097248 | 76977915 |
| cheese-intake | PS | -0.0291815 | -0.70266 | 0.62547 | 0.000851558 | 0 | 0.67945 | 0.916553 | 0.977166335 | 1 | 76977916 | 77895394 |
| cheese-intake | PS | 0.0716714 | -0.62547 | 0.84376 | 0.00513679 | 0 | 0.90009 | 0.809747 | 0.943164658 | 1 | 77895395 | 79065286 |
| cheese-intake | PS | -0.195657 | -0.7996 | 0.31501 | 0.0382818 | 0 | 0.65762 | 0.428282 | 0.772599009 | 1 | 80781443 | 82123368 |
| cheese-intake | PS | 0.262972 | -0.63712 | 1 | 0.0691545 | 0 | 1 | 0.492583 | 0.809650769 | 1 | 82123369 | 83461215 |
| cheese-intake | PS | -0.087122 | -0.7701 | 0.54736 | 0.00759025 | 0 | 0.71876 | 0.747298 | 0.922169351 | 1 | 84728348 | 86017267 |
| cheese-intake | PS | -0.0827542 | -0.89854 | 0.65686 | 0.00684827 | 0 | 0.98857 | 0.785314 | 0.933113527 | 1 | 88656690 | 89753964 |
| cheese-intake | PS | -0.36246 | -1 | 0.18139 | 0.131377 | 0 | 1 | 0.179232 | 0.583039554 | 1 | 90941550 | 91870059 |
| cheese-intake | PS | 0.256691 | -0.45905 | 1 | 0.0658903 | 0 | 1 | 0.424067 | 0.770730563 | 1 | 94168577 | 95122541 |
| cheese-intake | PS | -0.111157 | -0.72684 | 0.41788 | 0.0123559 | 0 | 0.56644 | 0.651804 | 0.884471335 | 1 | 96147577 | 97721186 |
| cheese-intake | PS | -0.283194 | -0.66708 | 0.041 | 0.0801989 | 0 | 0.445 | 0.0954372 | 0.482879102 | 1 | 97721187 | 99425000 |
| cheese-intake | PS | 0.579132 | -0.10333 | 1 | 0.335394 | 0 | 1 | 0.0918558 | 0.479791573 | 1 | 107874654 | 109271449 |
| cheese-intake | PS | -0.0350221 | -0.45507 | 0.37498 | 0.00122655 | 0 | 0.24284 | 0.856849 | 0.955614217 | 1 | 109271450 | 110224230 |
| cheese-intake | PS | 0.288209 | -0.08521 | 0.71151 | 0.0830644 | 0 | 0.50624 | 0.119044 | 0.518850788 | 1 | 110224231 | 111134062 |
| cheese-intake | PS | -0.214498 | -0.88346 | 0.32758 | 0.0460094 | 0 | 0.79929 | 0.411378 | 0.76747083 | 1 | 112489249 | 113418037 |
| cheese-intake | PS | -0.0896601 | -0.57138 | 0.36805 | 0.00803893 | 0 | 0.34799 | 0.677508 | 0.89679545 | 1 | 114664388 | 116207297 |
| cheese-intake | PS | 0.210457 | -0.36115 | 0.87276 | 0.0442922 | 0 | 0.77303 | 0.42163 | 0.768439498 | 1 | 116207298 | 117046311 |
| cheese-intake | PS | -0.355689 | -1 | 0.13212 | 0.126515 | 0 | 1 | 0.154572 | 0.562312094 | 1 | 117046312 | 118118667 |
| cheese-intake | PS | 0.355469 | -0.68836 | 1 | 0.126358 | 0 | 1 | 0.41874 | 0.767893591 | 1 | 120345067 | 145803848 |
| cheese-intake | PS | -0.0777675 | -0.87441 | 0.68502 | 0.00604778 | 0 | 0.96516 | 0.798884 | 0.940238575 | 1 | 147083836 | 149716037 |
| cheese-intake | PS | 0.164547 | -0.19141 | 0.52809 | 0.0270757 | 0 | 0.27921 | 0.338565 | 0.715080883 | 1 | 151146408 | 152535630 |
| cheese-intake | PS | 0.405589 | 0.04462 | 0.92583 | 0.164503 | 0.00404 | 0.85715 | 0.0288952 | 0.316086746 | 1 | 153410810 | 154685545 |
| cheese-intake | PS | -0.352381 | -0.69484 | -0.04823 | 0.124173 | 0.00344 | 0.48281 | 0.0246453 | 0.304892234 | 1 | 154685546 | 156813845 |
| cheese-intake | PS | 0.222344 | -0.12754 | 0.63654 | 0.049437 | 0 | 0.40591 | 0.206801 | 0.604666129 | 1 | 156813846 | 158081627 |
| cheese-intake | PS | 0.366953 | -0.20894 | 1 | 0.134654 | 0 | 1 | 0.183634 | 0.58903045 | 1 | 159882516 | 161054076 |
| cheese-intake | PS | -0.348679 | -1 | 0.51533 | 0.121577 | 0 | 1 | 0.364943 | 0.73939444 | 1 | 161054077 | 161945442 |
| cheese-intake | PS | 0.220797 | -0.20916 | 0.7892 | 0.0487515 | 0 | 0.62417 | 0.30994 | 0.693207941 | 1 | 161945443 | 163141862 |
| cheese-intake | PS | -0.305955 | -1 | 0.36292 | 0.0936083 | 0 | 1 | 0.330279 | 0.708953753 | 1 | 163141863 | 163854567 |
| cheese-intake | PS | -0.359688 | -0.95389 | 0.09997 | 0.129375 | 0 | 0.90991 | 0.122353 | 0.524415877 | 1 | 165553813 | 166458031 |
| cheese-intake | PS | -0.435856 | -1 | 0.04404 | 0.18997 | 0 | 1 | 0.0788885 | 0.457637373 | 1 | 167163955 | 168179086 |
| cheese-intake | PS | 0.139987 | -0.3457 | 0.67475 | 0.0195963 | 0 | 0.46992 | 0.542871 | 0.838940829 | 1 | 170193208 | 171044255 |
| cheese-intake | PS | -0.374602 | -1 | 0.16111 | 0.140327 | 0 | 1 | 0.170116 | 0.582296617 | 1 | 171044256 | 172465153 |
| cheese-intake | PS | 0.0589486 | -1 | 1 | 0.00347494 | 0 | 1 | 0.874513 | 0.962309464 | 1 | 172465154 | 173582511 |
| cheese-intake | PS | 0.164337 | -0.86332 | 1 | 0.0270067 | 0 | 1 | 0.677738 | 0.89679545 | 1 | 173582512 | 175385220 |
| cheese-intake | PS | 0.0612046 | -0.40166 | 0.55781 | 0.003746 | 0 | 0.34785 | 0.771992 | 0.92959111 | 1 | 176449097 | 177746472 |
| cheese-intake | PS | -0.193015 | -0.96198 | 0.40485 | 0.0372547 | 0 | 1 | 0.461563 | 0.793717072 | 1 | 181324206 | 182420540 |
| cheese-intake | PS | -0.055452 | -1 | 0.99024 | 0.00307492 | 0 | 1 | 0.885004 | 0.968315934 | 1 | 188625773 | 189904637 |
| cheese-intake | PS | -0.0900995 | -0.8161 | 0.56217 | 0.00811792 | 0 | 0.81767 | 0.741439 | 0.920037908 | 1 | 195161236 | 196179110 |
| cheese-intake | PS | 0.221883 | -0.14733 | 0.61734 | 0.049232 | 0 | 0.38111 | 0.226213 | 0.620938095 | 1 | 197935822 | 199263389 |
| cheese-intake | PS | -0.0277568 | -0.61347 | 0.56398 | 0.000770443 | 0 | 0.50338 | 0.912885 | 0.977166335 | 1 | 200134006 | 201067952 |
| cheese-intake | PS | 0.192139 | -0.35319 | 0.90082 | 0.0369175 | 0 | 0.8198 | 0.453462 | 0.788608569 | 1 | 201067953 | 202583884 |
| cheese-intake | PS | -0.304748 | -0.97487 | 0.17594 | 0.0928715 | 0 | 0.95037 | 0.201754 | 0.602877424 | 1 | 202583885 | 204092537 |
| cheese-intake | PS | 0.0599921 | -0.33617 | 0.45763 | 0.00359906 | 0 | 0.23253 | 0.7496 | 0.922454258 | 1 | 205917549 | 208162951 |
| cheese-intake | PS | 0.194089 | -0.18927 | 0.6336 | 0.0376706 | 0 | 0.40271 | 0.299893 | 0.685396365 | 1 | 208162952 | 209711169 |
| cheese-intake | PS | -0.0262028 | -0.94237 | 0.83876 | 0.000686585 | 0 | 1 | 0.937472 | 0.983547559 | 1 | 212347583 | 213958292 |
| cheese-intake | PS | -0.0147572 | -1 | 1 | 0.000217774 | 0 | 1 | 0.9706 | 0.993719113 | 1 | 214783873 | 215825791 |
| cheese-intake | PS | 0.083637 | -0.31333 | 0.49951 | 0.00699514 | 0 | 0.26095 | 0.663204 | 0.891843705 | 1 | 215825792 | 216658126 |
| cheese-intake | PS | -0.187868 | -0.88976 | 0.35636 | 0.0352943 | 0 | 0.83461 | 0.452412 | 0.787485322 | 1 | 216658127 | 217352165 |
| cheese-intake | PS | -0.0483602 | -0.75806 | 0.58908 | 0.00233871 | 0 | 0.73327 | 0.863626 | 0.958085094 | 1 | 223654903 | 224943337 |
| cheese-intake | PS | -0.614455 | -1 | -0.05718 | 0.377554 | 0.00816 | 1 | 0.0352335 | 0.342762835 | 1 | 228045555 | 229075156 |
| cheese-intake | PS | 0.229766 | -0.42079 | 1 | 0.0527922 | 0 | 1 | 0.445538 | 0.783590257 | 1 | 231287765 | 232177704 |
| cheese-intake | PS | 0.19681 | -0.03164 | 0.43184 | 0.0387342 | 0 | 0.18649 | 0.0930359 | 0.481545562 | 1 | 234365797 | 235097113 |
| cheese-intake | PS | 0.100678 | -0.33853 | 0.66509 | 0.0101361 | 0 | 0.48644 | 0.626538 | 0.868930667 | 1 | 235097114 | 236199671 |
| cheese-intake | PS | 0.151709 | -0.29939 | 0.63693 | 0.0230156 | 0 | 0.41228 | 0.475698 | 0.800015277 | 1 | 240248509 | 241033584 |
| cheese-intake | PS | 0.788645 | 0.24939 | 1 | 0.621961 | 0.06219 | 1 | 0.00658118 | 0.200879756 | 1 | 242417924 | 243048003 |
| cheese-intake | PS | 0.199107 | -0.43698 | 0.99937 | 0.0396438 | 0 | 1 | 0.487478 | 0.805889628 | 1 | 243048004 | 244723196 |
| cheese-intake | PS | -0.060649 | -0.50382 | 0.35777 | 0.0036783 | 0 | 0.27584 | 0.757721 | 0.924782058 | 1 | 246610291 | 247531112 |
| cheese-intake | PS | -0.11584 | -1 | 0.65854 | 0.0134188 | 0 | 1 | 0.710702 | 0.906057359 | 1 | 247531113 | 248341594 |
| cheese-intake | PS | -0.91899 | -1 | -0.33953 | 0.844543 | 0.11643 | 1 | 0.00364635 | 0.175132046 | 1 | 248341595 | 249240538 |
| cheese-intake | PS | -0.261563 | -1 | 0.3932 | 0.0684152 | 0 | 1 | 0.388609 | 0.753354749 | 2 | 10181 | 789195 |
| cheese-intake | PS | 0.154445 | -0.27787 | 0.63335 | 0.0238534 | 0 | 0.40453 | 0.46247 | 0.794034035 | 2 | 1875061 | 2680063 |
| cheese-intake | PS | -0.0254965 | -0.71747 | 0.6366 | 0.000650072 | 0 | 0.68759 | 0.927643 | 0.980162419 | 2 | 2680064 | 3314202 |
| cheese-intake | PS | -0.573978 | -1 | 0.17421 | 0.32945 | 0 | 1 | 0.124488 | 0.529478987 | 2 | 3314203 | 4016104 |
| cheese-intake | PS | 0.0440838 | -0.56857 | 0.6822 | 0.00194338 | 0 | 0.59995 | 0.867697 | 0.959359878 | 2 | 4016105 | 4766969 |
| cheese-intake | PS | 0.274304 | -0.16837 | 0.81072 | 0.0752429 | 0 | 0.65726 | 0.209093 | 0.606076286 | 2 | 5568654 | 6306606 |
| cheese-intake | PS | -0.163259 | -0.61463 | 0.24752 | 0.0266536 | 0 | 0.38093 | 0.413534 | 0.767893591 | 2 | 6306607 | 7108208 |
| cheese-intake | PS | -0.137596 | -0.9945 | 0.58313 | 0.0189328 | 0 | 1 | 0.636078 | 0.873870499 | 2 | 9960671 | 10611654 |
| cheese-intake | PS | -0.4458 | -1 | 0.19938 | 0.198738 | 0 | 1 | 0.156568 | 0.564405174 | 2 | 12732507 | 13625450 |
| cheese-intake | PS | -0.328313 | -0.80499 | 0.06095 | 0.107789 | 0 | 0.648 | 0.101461 | 0.493847431 | 2 | 17241116 | 18656325 |
| cheese-intake | PS | 0.630473 | 0.07888 | 1 | 0.397497 | 0.01138 | 1 | 0.0265651 | 0.305371 | 2 | 20064518 | 21084898 |
| cheese-intake | PS | -0.18572 | -0.62231 | 0.19861 | 0.0344919 | 0 | 0.39104 | 0.320794 | 0.701477339 | 2 | 22429641 | 23538527 |
| cheese-intake | PS | 0.12788 | -0.25223 | 0.53546 | 0.0163533 | 0 | 0.28748 | 0.495509 | 0.811042493 | 2 | 23538528 | 24669224 |
| cheese-intake | PS | -0.273394 | -1 | 0.28434 | 0.0747442 | 0 | 1 | 0.314545 | 0.695891758 | 2 | 24669225 | 25895394 |
| cheese-intake | PS | -0.563061 | -1 | -0.00785 | 0.317037 | 0.00543 | 1 | 0.0481979 | 0.373019766 | 2 | 25895395 | 26894102 |
| cheese-intake | PS | -0.608109 | -1 | -0.22196 | 0.369796 | 0.04927 | 1 | 0.00348585 | 0.172744678 | 2 | 26894103 | 28819510 |
| cheese-intake | PS | 0.181071 | -0.65285 | 1 | 0.0327865 | 0 | 1 | 0.594541 | 0.856160011 | 2 | 29627933 | 30575619 |
| cheese-intake | PS | 0.0399367 | -0.45234 | 0.54084 | 0.00159494 | 0 | 0.35047 | 0.860243 | 0.95628102 | 2 | 33123605 | 33735318 |
| cheese-intake | PS | -0.0719117 | -0.75815 | 0.54793 | 0.00517129 | 0 | 0.66773 | 0.794695 | 0.939368031 | 2 | 34239777 | 34890558 |
| cheese-intake | PS | 0.376157 | -0.35847 | 1 | 0.141494 | 0 | 1 | 0.273919 | 0.658777212 | 2 | 38887394 | 40087418 |
| cheese-intake | PS | -0.62174 | -1 | -0.05151 | 0.386561 | 0.00989 | 1 | 0.0384467 | 0.351728073 | 2 | 43295777 | 44104110 |
| cheese-intake | PS | -0.105761 | -0.81829 | 0.5217 | 0.0111855 | 0 | 0.74194 | 0.706109 | 0.904728126 | 2 | 50756241 | 51669493 |
| cheese-intake | PS | -0.195323 | -1 | 0.83374 | 0.0381511 | 0 | 1 | 0.625671 | 0.868930667 | 2 | 51669494 | 52494111 |
| cheese-intake | PS | 0.317788 | -0.3879 | 1 | 0.100989 | 0 | 1 | 0.331719 | 0.710888618 | 2 | 56394699 | 57433653 |
| cheese-intake | PS | 0.394735 | -0.21822 | 1 | 0.155815 | 0 | 1 | 0.186583 | 0.590484572 | 2 | 57433654 | 57952945 |
| cheese-intake | PS | -0.270355 | -0.79052 | 0.16985 | 0.0730917 | 0 | 0.62493 | 0.218082 | 0.615142653 | 2 | 57952946 | 59251996 |
| cheese-intake | PS | -0.0111447 | -0.26004 | 0.23716 | 0.000124203 | 0 | 0.08195 | 0.927269 | 0.980084322 | 2 | 59251997 | 60775066 |
| cheese-intake | PS | -0.0101645 | -0.21716 | 0.19297 | 0.000103318 | 0 | 0.0564 | 0.921688 | 0.978712749 | 2 | 60775067 | 62429910 |
| cheese-intake | PS | -0.443165 | -0.76196 | -0.15921 | 0.196395 | 0.02535 | 0.58058 | 0.00259676 | 0.163096503 | 2 | 62429911 | 63672118 |
| cheese-intake | PS | -0.0759605 | -0.82295 | 0.59336 | 0.00577 | 0 | 0.89667 | 0.788906 | 0.933538767 | 2 | 63672119 | 64696089 |
| cheese-intake | PS | -0.113682 | -0.68365 | 0.39577 | 0.0129235 | 0 | 0.49907 | 0.626356 | 0.868930667 | 2 | 64696090 | 65938002 |
| cheese-intake | PS | -0.167074 | -0.57486 | 0.20394 | 0.0279137 | 0 | 0.33084 | 0.371175 | 0.743772391 | 2 | 65938003 | 67224027 |
| cheese-intake | PS | -0.0390687 | -0.72643 | 0.62117 | 0.00152636 | 0 | 0.70658 | 0.887638 | 0.969573815 | 2 | 68877775 | 70756283 |
| cheese-intake | PS | -0.0592458 | -0.9146 | 0.72176 | 0.00351006 | 0 | 1 | 0.852717 | 0.955373322 | 2 | 70756284 | 71385813 |
| cheese-intake | PS | -0.335095 | -0.82668 | 0.06033 | 0.112289 | 0 | 0.6834 | 0.102465 | 0.496571285 | 2 | 71385814 | 72160302 |
| cheese-intake | PS | 0.459802 | -0.04816 | 1 | 0.211417 | 0 | 1 | 0.0718263 | 0.442981945 | 2 | 73544291 | 75148103 |
| cheese-intake | PS | 0.234283 | -0.29946 | 0.85721 | 0.0548885 | 0 | 0.73662 | 0.342765 | 0.71676685 | 2 | 76649031 | 77372830 |
| cheese-intake | PS | 0.469557 | -0.00285 | 1 | 0.220483 | 0 | 1 | 0.0542808 | 0.388774326 | 2 | 77372831 | 78080057 |
| cheese-intake | PS | 0.0319306 | -0.54178 | 0.66617 | 0.00101956 | 0 | 0.54408 | 0.901872 | 0.973080262 | 2 | 100202437 | 101556799 |
| cheese-intake | PS | -0.0371165 | -1 | 1 | 0.00137763 | 0 | 1 | 0.92362 | 0.979618732 | 2 | 101556800 | 102494487 |
| cheese-intake | PS | 0.770745 | 0.11768 | 1 | 0.594047 | 0.02399 | 1 | 0.0273354 | 0.305744577 | 2 | 107412296 | 108417773 |
| cheese-intake | PS | -0.23571 | -0.68757 | 0.14843 | 0.0555593 | 0 | 0.47276 | 0.216751 | 0.615038024 | 2 | 108417774 | 110097868 |
| cheese-intake | PS | -0.324499 | -0.74184 | 0.02941 | 0.105299 | 0 | 0.55033 | 0.0680506 | 0.433947627 | 2 | 110097869 | 112644828 |
| cheese-intake | PS | 0.283507 | -0.25281 | 0.99724 | 0.0803761 | 0 | 0.99535 | 0.275814 | 0.661111191 | 2 | 119635490 | 121073752 |
| cheese-intake | PS | 0.377682 | -0.05694 | 0.93331 | 0.142644 | 0 | 0.87107 | 0.0864236 | 0.470432463 | 2 | 121073753 | 122026817 |
| cheese-intake | PS | -0.425214 | -1 | 0.27147 | 0.180807 | 0 | 1 | 0.201374 | 0.602877424 | 2 | 124730992 | 125741528 |
| cheese-intake | PS | -0.46566 | -1 | 0.01326 | 0.216839 | 0 | 1 | 0.0577744 | 0.402808045 | 2 | 126754028 | 127895644 |
| cheese-intake | PS | -0.267167 | -1 | 0.4569 | 0.071378 | 0 | 1 | 0.40459 | 0.762927794 | 2 | 129486898 | 130485398 |
| cheese-intake | PS | -0.244782 | -0.68943 | 0.14077 | 0.0599181 | 0 | 0.47585 | 0.207364 | 0.604688236 | 2 | 135160198 | 137061003 |
| cheese-intake | PS | -0.0547633 | -0.63883 | 0.50136 | 0.00299901 | 0 | 0.52194 | 0.82 | 0.944542385 | 2 | 138073792 | 139505819 |
| cheese-intake | PS | 0.246217 | -0.57705 | 1 | 0.060623 | 0 | 1 | 0.488074 | 0.805889628 | 2 | 140934532 | 141802664 |
| cheese-intake | PS | -0.44664 | -1 | 0.34824 | 0.199488 | 0 | 1 | 0.228084 | 0.620938095 | 2 | 141802665 | 142494980 |
| cheese-intake | PS | -0.205293 | -0.97291 | 0.40674 | 0.0421454 | 0 | 0.98336 | 0.466867 | 0.797004519 | 2 | 142494981 | 143259780 |
| cheese-intake | PS | -0.361848 | -1 | 0.13452 | 0.130934 | 0 | 1 | 0.144239 | 0.545236775 | 2 | 143259781 | 144503688 |
| cheese-intake | PS | -1 | -1 | -0.37995 | 1 | 0.14573 | 1 | 0.000198072 | 0.05598169 | 2 | 144503689 | 145977920 |
| cheese-intake | PS | 0.145624 | -0.72362 | 1 | 0.0212062 | 0 | 1 | 0.682804 | 0.900136915 | 2 | 147252197 | 149568875 |
| cheese-intake | PS | -0.621902 | -1 | 0.16967 | 0.386762 | 0 | 1 | 0.109938 | 0.508421114 | 2 | 151428989 | 152497375 |
| cheese-intake | PS | -0.644226 | -1 | 0.15475 | 0.415028 | 0 | 1 | 0.116637 | 0.516275157 | 2 | 153999310 | 155207969 |
| cheese-intake | PS | 0.480132 | 0.05868 | 1 | 0.230527 | 0.00642 | 1 | 0.0272985 | 0.305744577 | 2 | 157556097 | 159040979 |
| cheese-intake | PS | -0.855235 | -1 | -0.17951 | 0.731427 | 0.0374 | 1 | 0.0178567 | 0.283368889 | 2 | 160200380 | 161432089 |
| cheese-intake | PS | -0.0373762 | -0.33046 | 0.25115 | 0.00139698 | 0 | 0.12112 | 0.796866 | 0.940138903 | 2 | 161432090 | 163607635 |
| cheese-intake | PS | -0.141172 | -0.5726 | 0.26615 | 0.0199295 | 0 | 0.33061 | 0.467576 | 0.797004519 | 2 | 163607636 | 164702312 |
| cheese-intake | PS | 0.675075 | 0.11685 | 1 | 0.455726 | 0.01719 | 1 | 0.0199907 | 0.292402657 | 2 | 164702313 | 165917788 |
| cheese-intake | PS | 0.298652 | -0.29926 | 1 | 0.0891928 | 0 | 1 | 0.282447 | 0.668934463 | 2 | 165917789 | 167488576 |
| cheese-intake | PS | 0.0476786 | -0.44095 | 0.55088 | 0.00227325 | 0 | 0.35459 | 0.832199 | 0.946695205 | 2 | 169224446 | 170155561 |
| cheese-intake | PS | -0.0672186 | -0.53833 | 0.38081 | 0.00451834 | 0 | 0.31817 | 0.749158 | 0.922454258 | 2 | 170865766 | 171566482 |
| cheese-intake | PS | -0.216603 | -0.55477 | 0.10354 | 0.0469168 | 0 | 0.30777 | 0.176464 | 0.582296617 | 2 | 173287858 | 174118389 |
| cheese-intake | PS | 0.271572 | -0.13276 | 0.76899 | 0.0737516 | 0 | 0.5938 | 0.185766 | 0.58904054 | 2 | 174118390 | 174927563 |
| cheese-intake | PS | -0.380874 | -0.96569 | 0.05836 | 0.145065 | 0 | 0.93256 | 0.088798 | 0.478010038 | 2 | 179224871 | 180336045 |
| cheese-intake | PS | 0.154988 | -0.45981 | 0.90793 | 0.0240212 | 0 | 0.86097 | 0.578517 | 0.853279664 | 2 | 181309940 | 182307877 |
| cheese-intake | PS | 0.17623 | -0.48374 | 1 | 0.0310572 | 0 | 1 | 0.55853 | 0.844653041 | 2 | 182307878 | 183352290 |
| cheese-intake | PS | 0.0758505 | -0.92286 | 1 | 0.0057533 | 0 | 1 | 0.83713 | 0.948975213 | 2 | 183352291 | 184148655 |
| cheese-intake | PS | -0.305288 | -1 | 0.2761 | 0.0932007 | 0 | 1 | 0.285819 | 0.671571837 | 2 | 184148656 | 184866232 |
| cheese-intake | PS | -0.0974318 | -0.60698 | 0.37693 | 0.00949296 | 0 | 0.39167 | 0.662445 | 0.891843705 | 2 | 193033983 | 195300250 |
| cheese-intake | PS | 0.260832 | -0.25506 | 1 | 0.0680331 | 0 | 1 | 0.290714 | 0.67501725 | 2 | 196446300 | 198140350 |
| cheese-intake | PS | 0.283206 | -0.25251 | 1 | 0.0802055 | 0 | 1 | 0.280093 | 0.666751996 | 2 | 199654970 | 201324132 |
| cheese-intake | PS | 0.106358 | -0.55597 | 0.88958 | 0.011312 | 0 | 0.92923 | 0.710803 | 0.906057359 | 2 | 202504863 | 203639686 |
| cheese-intake | PS | 0.083171 | -0.6532 | 0.94675 | 0.00691742 | 0 | 1 | 0.787069 | 0.933152665 | 2 | 203639687 | 205038119 |
| cheese-intake | PS | 0.0210471 | -0.58498 | 0.64712 | 0.000442979 | 0 | 0.56574 | 0.936242 | 0.98288858 | 2 | 205038120 | 206821199 |
| cheese-intake | PS | 0.513928 | -0.3621 | 1 | 0.264122 | 0 | 1 | 0.211454 | 0.609002437 | 2 | 210842458 | 212520453 |
| cheese-intake | PS | -0.0586584 | -0.61066 | 0.46096 | 0.00344081 | 0 | 0.42133 | 0.804679 | 0.941740696 | 2 | 213194363 | 214044566 |
| cheese-intake | PS | 0.026728 | -0.64469 | 0.74235 | 0.000714385 | 0 | 0.72367 | 0.925115 | 0.979709984 | 2 | 215002485 | 215899570 |
| cheese-intake | PS | -0.261288 | -0.64935 | 0.07895 | 0.0682715 | 0 | 0.42166 | 0.127936 | 0.532778211 | 2 | 215899571 | 217566011 |
| cheese-intake | PS | -0.443272 | -1 | 0.22822 | 0.19649 | 0 | 1 | 0.175504 | 0.582296617 | 2 | 217566012 | 218396258 |
| cheese-intake | PS | -0.471336 | -1 | -0.08569 | 0.222157 | 0.00916 | 1 | 0.019227 | 0.292045418 | 2 | 219678784 | 220771552 |
| cheese-intake | PS | -0.130574 | -1 | 0.59216 | 0.0170496 | 0 | 1 | 0.676966 | 0.89679545 | 2 | 220771553 | 221445191 |
| cheese-intake | PS | 0.257947 | -0.17232 | 0.77609 | 0.0665367 | 0 | 0.60231 | 0.22753 | 0.620938095 | 2 | 221445192 | 222327713 |
| cheese-intake | PS | -0.077811 | -0.61152 | 0.42644 | 0.00605455 | 0 | 0.41637 | 0.734664 | 0.917848257 | 2 | 222327714 | 223353965 |
| cheese-intake | PS | 0.769012 | 0.2431 | 1 | 0.591379 | 0.05936 | 1 | 0.00611375 | 0.200879756 | 2 | 224938732 | 226242842 |
| cheese-intake | PS | 0.490569 | 0.15788 | 0.90768 | 0.240658 | 0.02495 | 0.82389 | 0.00643261 | 0.200879756 | 2 | 230541093 | 231847386 |
| cheese-intake | PS | 0.35933 | -0.22495 | 1 | 0.129118 | 0 | 1 | 0.202505 | 0.602877424 | 2 | 231847387 | 233352722 |
| cheese-intake | PS | 0.169756 | -0.27118 | 0.66928 | 0.0288172 | 0 | 0.45414 | 0.418615 | 0.767893591 | 2 | 233352723 | 234115092 |
| cheese-intake | PS | -0.0578395 | -0.74219 | 0.58497 | 0.0033454 | 0 | 0.73412 | 0.831786 | 0.946695205 | 2 | 234115093 | 234945577 |
| cheese-intake | PS | -0.14371 | -0.74555 | 0.38994 | 0.0206527 | 0 | 0.57716 | 0.556769 | 0.84420035 | 2 | 234945578 | 235625789 |
| cheese-intake | PS | 0.593721 | -0.14028 | 1 | 0.352504 | 0 | 1 | 0.0995221 | 0.48639381 | 2 | 236276288 | 237194297 |
| cheese-intake | PS | 0.194474 | -0.18063 | 0.60951 | 0.0378201 | 0 | 0.37176 | 0.300876 | 0.685716615 | 2 | 238185483 | 238814630 |
| cheese-intake | PS | 0.267464 | -0.47791 | 1 | 0.0715367 | 0 | 1 | 0.426511 | 0.772599009 | 2 | 238814631 | 239634350 |
| cheese-intake | PS | 0.290322 | -0.25148 | 1 | 0.0842866 | 0 | 1 | 0.258168 | 0.643621228 | 2 | 239634351 | 240325600 |
| cheese-intake | PS | 0.0919829 | -0.42178 | 0.65464 | 0.00846084 | 0 | 0.49003 | 0.687435 | 0.900892552 | 2 | 240325601 | 241113279 |
| cheese-intake | PS | -0.363268 | -1 | 0.1167 | 0.131964 | 0 | 1 | 0.12978 | 0.534632683 | 2 | 241113280 | 241910366 |
| cheese-intake | PS | -0.349643 | -1 | 0.15489 | 0.12225 | 0 | 1 | 0.166719 | 0.579193756 | 3 | 3128153 | 4109393 |
| cheese-intake | PS | -0.291553 | -1 | 0.40001 | 0.0850032 | 0 | 1 | 0.360817 | 0.736057665 | 3 | 4109394 | 4835083 |
| cheese-intake | PS | -0.309098 | -0.76712 | 0.0824 | 0.0955418 | 0 | 0.58847 | 0.115482 | 0.516275157 | 3 | 4835084 | 5496182 |
| cheese-intake | PS | -0.126163 | -1 | 0.6004 | 0.0159172 | 0 | 1 | 0.674571 | 0.89679545 | 3 | 5496183 | 6421145 |
| cheese-intake | PS | -0.475911 | -1 | -0.04855 | 0.226491 | 0.00539 | 1 | 0.0346891 | 0.341248797 | 3 | 7529555 | 8664892 |
| cheese-intake | PS | -0.234092 | -0.90104 | 0.26055 | 0.0547992 | 0 | 0.81434 | 0.327977 | 0.707166557 | 3 | 8664893 | 9970731 |
| cheese-intake | PS | 0.298661 | -0.15747 | 0.87874 | 0.0891984 | 0 | 0.77407 | 0.191072 | 0.596557161 | 3 | 9970732 | 11226367 |
| cheese-intake | PS | -0.594674 | -1 | -0.02225 | 0.353637 | 0.0054 | 1 | 0.0438263 | 0.360793635 | 3 | 12859210 | 14312007 |
| cheese-intake | PS | 0.130113 | -0.473 | 0.82527 | 0.0169293 | 0 | 0.73791 | 0.631424 | 0.870590801 | 3 | 16084006 | 17182494 |
| cheese-intake | PS | -0.0651261 | -0.36785 | 0.23621 | 0.00424141 | 0 | 0.14118 | 0.66372 | 0.891843705 | 3 | 17182495 | 19030988 |
| cheese-intake | PS | 0.206269 | -0.65862 | 1 | 0.0425467 | 0 | 1 | 0.574247 | 0.850562677 | 3 | 19030989 | 20754842 |
| cheese-intake | PS | 0.158751 | -0.31528 | 0.72497 | 0.0252018 | 0 | 0.53472 | 0.488657 | 0.806037254 | 3 | 20754843 | 21790867 |
| cheese-intake | PS | 0.544094 | -0.36217 | 1 | 0.296038 | 0 | 1 | 0.205503 | 0.603996364 | 3 | 22648002 | 23426044 |
| cheese-intake | PS | -0.192925 | -0.72831 | 0.26452 | 0.03722 | 0 | 0.5346 | 0.390406 | 0.754395872 | 3 | 24270190 | 25516193 |
| cheese-intake | PS | -0.0698603 | -0.58459 | 0.42209 | 0.00488046 | 0 | 0.3867 | 0.756885 | 0.924107069 | 3 | 28649811 | 29877022 |
| cheese-intake | PS | -0.168626 | -0.53618 | 0.17782 | 0.0284347 | 0 | 0.28804 | 0.320657 | 0.701477339 | 3 | 31269698 | 32378805 |
| cheese-intake | PS | 0.194636 | -0.52095 | 1 | 0.0378833 | 0 | 1 | 0.5361 | 0.833763143 | 3 | 35913034 | 36840136 |
| cheese-intake | PS | -0.45857 | -1 | 0.02643 | 0.210286 | 0 | 1 | 0.070123 | 0.439581033 | 3 | 36840137 | 38729767 |
| cheese-intake | PS | 0.166876 | -0.31788 | 0.74551 | 0.0278476 | 0 | 0.5663 | 0.478807 | 0.800410688 | 3 | 40897628 | 42301657 |
| cheese-intake | PS | 0.0157474 | -0.29844 | 0.33036 | 0.00024798 | 0 | 0.13468 | 0.91842 | 0.977373646 | 3 | 42301658 | 44141693 |
| cheese-intake | PS | 0.0869151 | -0.26053 | 0.45048 | 0.00755424 | 0 | 0.20635 | 0.60953 | 0.861631208 | 3 | 45844192 | 47588461 |
| cheese-intake | PS | -0.371476 | -0.82263 | -0.00672 | 0.137994 | 0.00154 | 0.67671 | 0.0473263 | 0.369827342 | 3 | 47588462 | 50387742 |
| cheese-intake | PS | 0.0851815 | -0.23462 | 0.41455 | 0.00725589 | 0 | 0.17629 | 0.590854 | 0.855475038 | 3 | 54074845 | 54892586 |
| cheese-intake | PS | -0.126528 | -0.52691 | 0.2401 | 0.0160093 | 0 | 0.27992 | 0.495901 | 0.811042493 | 3 | 54892587 | 55616625 |
| cheese-intake | PS | 1 | 0.28711 | 1 | 1 | 0.0862 | 1 | 0.00171888 | 0.133663383 | 3 | 58557719 | 59998583 |
| cheese-intake | PS | 0.486068 | -0.28836 | 1 | 0.236262 | 0 | 1 | 0.191144 | 0.596557161 | 3 | 62609819 | 63670803 |
| cheese-intake | PS | -0.343143 | -0.96922 | 0.12609 | 0.117747 | 0 | 0.93938 | 0.141576 | 0.544641084 | 3 | 63670804 | 64662373 |
| cheese-intake | PS | 0.292365 | -0.09514 | 0.76105 | 0.0854772 | 0 | 0.58034 | 0.138318 | 0.540048903 | 3 | 65326752 | 66702084 |
| cheese-intake | PS | -0.903261 | -1 | -0.25117 | 0.81588 | 0.06508 | 1 | 0.00798166 | 0.215438856 | 3 | 66702085 | 67454740 |
| cheese-intake | PS | 0.513218 | -0.3848 | 1 | 0.263393 | 0 | 1 | 0.205963 | 0.603996364 | 3 | 67454741 | 68319770 |
| cheese-intake | PS | -0.0805677 | -0.57277 | 0.37907 | 0.00649115 | 0 | 0.351 | 0.709815 | 0.906057359 | 3 | 68319771 | 69784969 |
| cheese-intake | PS | -0.0169731 | -0.46386 | 0.42721 | 0.000288086 | 0 | 0.28238 | 0.934494 | 0.982241359 | 3 | 71223282 | 72334704 |
| cheese-intake | PS | 0.820506 | 0.0721 | 1 | 0.67323 | 0.01584 | 1 | 0.0361454 | 0.34720846 | 3 | 73606613 | 74383137 |
| cheese-intake | PS | -0.306608 | -1 | 0.4217 | 0.0940083 | 0 | 1 | 0.362102 | 0.736639394 | 3 | 76157471 | 77507832 |
| cheese-intake | PS | -0.210023 | -1 | 0.48775 | 0.0441096 | 0 | 1 | 0.497953 | 0.812187184 | 3 | 85807680 | 86660979 |
| cheese-intake | PS | -0.316987 | -1 | 0.20622 | 0.100481 | 0 | 1 | 0.21203 | 0.609154919 | 3 | 100552523 | 101906989 |
| cheese-intake | PS | -0.129218 | -0.39011 | 0.13222 | 0.0166972 | 0 | 0.15218 | 0.315273 | 0.695891758 | 3 | 106174686 | 107736519 |
| cheese-intake | PS | 0.233865 | -0.1054 | 0.62068 | 0.0546928 | 0 | 0.38524 | 0.176968 | 0.582296617 | 3 | 113657666 | 115649909 |
| cheese-intake | PS | 0.21103 | -0.28838 | 0.85952 | 0.0445336 | 0 | 0.74497 | 0.386996 | 0.751444076 | 3 | 116498571 | 117241644 |
| cheese-intake | PS | -0.266 | -1 | 0.71392 | 0.0707558 | 0 | 1 | 0.514194 | 0.822603387 | 3 | 118086930 | 118903053 |
| cheese-intake | PS | 0.460254 | -0.02703 | 1 | 0.211834 | 0 | 1 | 0.0681614 | 0.433947627 | 3 | 122340833 | 123518507 |
| cheese-intake | PS | -0.220323 | -1 | 0.59759 | 0.0485422 | 0 | 1 | 0.536602 | 0.833958029 | 3 | 131373471 | 132124018 |
| cheese-intake | PS | -0.167303 | -0.85925 | 0.40569 | 0.0279902 | 0 | 0.76771 | 0.52546 | 0.826888961 | 3 | 132925968 | 133718493 |
| cheese-intake | PS | 0.132605 | -0.17066 | 0.44059 | 0.0175842 | 0 | 0.19474 | 0.379866 | 0.747107314 | 3 | 133718494 | 135288394 |
| cheese-intake | PS | -0.396046 | -1 | 0.17666 | 0.156853 | 0 | 1 | 0.167795 | 0.579300708 | 3 | 137372142 | 138693846 |
| cheese-intake | PS | 0.202008 | -0.41784 | 1 | 0.0408071 | 0 | 1 | 0.478144 | 0.800410688 | 3 | 139831268 | 141034637 |
| cheese-intake | PS | -0.0183074 | -0.55471 | 0.5203 | 0.000335163 | 0 | 0.41355 | 0.938994 | 0.984511847 | 3 | 141034638 | 141898978 |
| cheese-intake | PS | -0.327375 | -0.76972 | 0.04758 | 0.107174 | 0 | 0.59247 | 0.0863164 | 0.470432463 | 3 | 141898979 | 142976707 |
| cheese-intake | PS | 0.184198 | -0.48355 | 1 | 0.0339288 | 0 | 1 | 0.536093 | 0.833763143 | 3 | 142976708 | 144408821 |
| cheese-intake | PS | -0.752911 | -1 | -0.03463 | 0.566875 | 0.01091 | 1 | 0.0442983 | 0.360793635 | 3 | 144408822 | 145211907 |
| cheese-intake | PS | -0.681567 | -1 | -0.10114 | 0.464533 | 0.01658 | 1 | 0.0255051 | 0.305371 | 3 | 148638309 | 149998411 |
| cheese-intake | PS | 0.336959 | -0.08428 | 0.89467 | 0.113541 | 0 | 0.80229 | 0.110682 | 0.508421114 | 3 | 149998412 | 151131307 |
| cheese-intake | PS | 0.345017 | -0.18224 | 1 | 0.119037 | 0 | 1 | 0.190754 | 0.596557161 | 3 | 151904022 | 153406718 |
| cheese-intake | PS | 0.606962 | 0.16997 | 1 | 0.368403 | 0.0297 | 1 | 0.00937674 | 0.232003279 | 3 | 155046424 | 155928190 |
| cheese-intake | PS | -0.170754 | -0.82276 | 0.3448 | 0.0291568 | 0 | 0.72175 | 0.476459 | 0.800410688 | 3 | 158460059 | 159478751 |
| cheese-intake | PS | -0.0467499 | -0.52218 | 0.419 | 0.00218555 | 0 | 0.32059 | 0.828871 | 0.946535904 | 3 | 167118894 | 168972662 |
| cheese-intake | PS | 0.100808 | -0.35924 | 0.6028 | 0.0101622 | 0 | 0.38001 | 0.649512 | 0.883509451 | 3 | 170174579 | 171134849 |
| cheese-intake | PS | 0.0126495 | -0.61733 | 0.61817 | 0.00016001 | 0 | 0.56946 | 0.961472 | 0.991317435 | 3 | 171134850 | 172004760 |
| cheese-intake | PS | -0.208177 | -0.83337 | 0.26908 | 0.0433375 | 0 | 0.70978 | 0.367222 | 0.741711226 | 3 | 172004761 | 173415591 |
| cheese-intake | PS | 0.235863 | -0.24919 | 0.85485 | 0.0556313 | 0 | 0.73258 | 0.32322 | 0.703585987 | 3 | 173415592 | 174684707 |
| cheese-intake | PS | 0.450255 | 0.04704 | 0.96717 | 0.202729 | 0.00497 | 0.93541 | 0.0281181 | 0.312359573 | 3 | 178110323 | 179372165 |
| cheese-intake | PS | 0.561024 | 0.16966 | 1 | 0.314748 | 0.02919 | 1 | 0.00718271 | 0.205706476 | 3 | 181424324 | 183203155 |
| cheese-intake | PS | 0.280663 | -0.12778 | 0.76057 | 0.0787717 | 0 | 0.57846 | 0.170676 | 0.582296617 | 3 | 183203156 | 184524268 |
| cheese-intake | PS | -0.728529 | -1 | -0.1535 | 0.530754 | 0.0263 | 1 | 0.0171262 | 0.283368889 | 3 | 184524269 | 185709996 |
| cheese-intake | PS | -0.150678 | -0.59159 | 0.22697 | 0.0227038 | 0 | 0.3562 | 0.420123 | 0.767893591 | 3 | 186602046 | 187939199 |
| cheese-intake | PS | -0.160825 | -0.60212 | 0.19445 | 0.0258647 | 0 | 0.36625 | 0.358056 | 0.733165841 | 3 | 187939200 | 189451805 |
| cheese-intake | PS | 0.085478 | -0.50183 | 0.73546 | 0.00730648 | 0 | 0.6176 | 0.742852 | 0.920741796 | 3 | 191229358 | 192049688 |
| cheese-intake | PS | -0.236319 | -0.69949 | 0.17516 | 0.0558468 | 0 | 0.49065 | 0.243597 | 0.635037917 | 3 | 193122091 | 194217140 |
| cheese-intake | PS | 0.0884009 | -0.38197 | 0.61039 | 0.00781471 | 0 | 0.40522 | 0.681017 | 0.899030526 | 3 | 194217141 | 195196789 |
| cheese-intake | PS | 0.302045 | -0.3866 | 1 | 0.0912314 | 0 | 1 | 0.340292 | 0.716609936 | 3 | 195196790 | 195710290 |
| cheese-intake | PS | -0.182833 | -0.67828 | 0.2355 | 0.033428 | 0 | 0.46121 | 0.375336 | 0.744326334 | 3 | 195710291 | 196383152 |
| cheese-intake | PS | 0.487308 | 0.0255 | 1 | 0.237469 | 0.00486 | 1 | 0.0409266 | 0.357174253 | 3 | 196383153 | 197147990 |
| cheese-intake | PS | -0.514463 | -1 | -0.01295 | 0.264673 | 0.0038 | 1 | 0.0487564 | 0.373576347 | 3 | 197147991 | 197962380 |
| cheese-intake | PS | 0.309078 | -0.03031 | 0.7087 | 0.095529 | 0 | 0.50226 | 0.0805302 | 0.460358212 | 4 | 1529268 | 2468935 |
| cheese-intake | PS | -0.374909 | -1 | 0.4113 | 0.140557 | 0 | 1 | 0.302219 | 0.686402819 | 4 | 3549230 | 4266178 |
| cheese-intake | PS | -0.0016354 | -1 | 1 | 0.00000267 | 0 | 1 | 0.996595 | 0.999256787 | 4 | 4266179 | 5051834 |
| cheese-intake | PS | 0.620895 | 0.04046 | 1 | 0.385511 | 0.00749 | 1 | 0.0439172 | 0.360793635 | 4 | 7726035 | 8309826 |
| cheese-intake | PS | 0.0634619 | -0.487 | 0.62405 | 0.00402742 | 0 | 0.46603 | 0.796577 | 0.940138903 | 4 | 13127577 | 14395886 |
| cheese-intake | PS | 0.116909 | -0.92652 | 1 | 0.0136677 | 0 | 1 | 0.769669 | 0.92959111 | 4 | 14967148 | 15910801 |
| cheese-intake | PS | -0.0626263 | -0.83136 | 0.67141 | 0.00392206 | 0 | 0.9285 | 0.830424 | 0.946654375 | 4 | 15910802 | 17290236 |
| cheese-intake | PS | -0.0330694 | -0.62668 | 0.54644 | 0.00109359 | 0 | 0.50576 | 0.891759 | 0.971152015 | 4 | 17290237 | 18753263 |
| cheese-intake | PS | -0.589263 | -1 | -0.1029 | 0.347231 | 0.01455 | 1 | 0.0219684 | 0.295914324 | 4 | 18753264 | 20086838 |
| cheese-intake | PS | 0.0791301 | -0.20718 | 0.37162 | 0.00626157 | 0 | 0.14007 | 0.576793 | 0.85201535 | 4 | 20086839 | 21416380 |
| cheese-intake | PS | -0.803364 | -1 | -0.15949 | 0.645394 | 0.03132 | 1 | 0.0156037 | 0.273599214 | 4 | 21416381 | 22835185 |
| cheese-intake | PS | 0.142632 | -0.34071 | 0.68052 | 0.0203439 | 0 | 0.47848 | 0.540597 | 0.83756632 | 4 | 25832019 | 27385580 |
| cheese-intake | PS | -0.347928 | -1 | 0.39898 | 0.121054 | 0 | 1 | 0.307111 | 0.689838051 | 4 | 32260118 | 32746820 |
| cheese-intake | PS | -0.392423 | -1 | 0.19393 | 0.153996 | 0 | 1 | 0.178624 | 0.582803181 | 4 | 39820062 | 40590541 |
| cheese-intake | PS | -0.104926 | -0.47602 | 0.25764 | 0.0110094 | 0 | 0.23236 | 0.551279 | 0.843473948 | 4 | 41360938 | 42189251 |
| cheese-intake | PS | 0.133806 | -0.70586 | 1 | 0.017904 | 0 | 1 | 0.698035 | 0.903972224 | 4 | 42189252 | 43192424 |
| cheese-intake | PS | -0.78622 | -1 | -0.2502 | 0.618141 | 0.06366 | 1 | 0.0065336 | 0.200879756 | 4 | 43962562 | 45186767 |
| cheese-intake | PS | -0.376148 | -1 | 0.17488 | 0.141488 | 0 | 1 | 0.170937 | 0.582296617 | 4 | 46358361 | 47408265 |
| cheese-intake | PS | -0.682671 | -1 | -0.06131 | 0.46604 | 0.01082 | 1 | 0.0391945 | 0.352687624 | 4 | 54659779 | 55681701 |
| cheese-intake | PS | 0.0317172 | -0.55002 | 0.62534 | 0.00100598 | 0 | 0.50959 | 0.900224 | 0.972909194 | 4 | 57103101 | 58011085 |
| cheese-intake | PS | 0.157193 | -0.18335 | 0.52788 | 0.0247096 | 0 | 0.27866 | 0.364647 | 0.739253322 | 4 | 58011086 | 58940256 |
| cheese-intake | PS | -0.0349179 | -0.70651 | 0.63662 | 0.00121926 | 0 | 0.75754 | 0.898755 | 0.971964844 | 4 | 60746710 | 61971161 |
| cheese-intake | PS | 0.0892563 | -0.39811 | 0.60726 | 0.00796668 | 0 | 0.3958 | 0.692053 | 0.901933399 | 4 | 61971162 | 63337954 |
| cheese-intake | PS | -0.0229454 | -0.85977 | 0.78389 | 0.000526493 | 0 | 1 | 0.943392 | 0.986589264 | 4 | 67616363 | 68742859 |
| cheese-intake | PS | -0.529039 | -1 | 0.18264 | 0.279882 | 0 | 1 | 0.148102 | 0.550971968 | 4 | 71468301 | 73258294 |
| cheese-intake | PS | -0.731324 | -1 | -0.19907 | 0.534834 | 0.04106 | 1 | 0.00949685 | 0.233208362 | 4 | 73258295 | 74885900 |
| cheese-intake | PS | -0.0730309 | -0.46703 | 0.28476 | 0.00533351 | 0 | 0.23147 | 0.68535 | 0.900136915 | 4 | 74885901 | 76497358 |
| cheese-intake | PS | -0.203497 | -0.67838 | 0.21723 | 0.041411 | 0 | 0.463 | 0.323504 | 0.703585987 | 4 | 76497359 | 78045637 |
| cheese-intake | PS | -0.302087 | -1 | 0.50174 | 0.0912564 | 0 | 1 | 0.384785 | 0.751421205 | 4 | 78045638 | 78967715 |
| cheese-intake | PS | -0.446549 | -1 | 0.10587 | 0.199406 | 0 | 1 | 0.11189 | 0.509669093 | 4 | 78967716 | 79880101 |
| cheese-intake | PS | -0.504152 | -1 | 0.07609 | 0.254169 | 0 | 1 | 0.090605 | 0.478016906 | 4 | 86931671 | 88502717 |
| cheese-intake | PS | -0.334084 | -1 | 0.59684 | 0.111612 | 0 | 1 | 0.395867 | 0.756176066 | 4 | 88502718 | 89244554 |
| cheese-intake | PS | 0.113486 | -0.43766 | 0.74786 | 0.0128792 | 0 | 0.62252 | 0.654423 | 0.886651297 | 4 | 89244555 | 90236971 |
| cheese-intake | PS | 0.204651 | -0.83586 | 1 | 0.0418819 | 0 | 1 | 0.614715 | 0.863358047 | 4 | 91309864 | 92219192 |
| cheese-intake | PS | 0.26125 | -0.20208 | 0.83217 | 0.0682516 | 0 | 0.69501 | 0.257912 | 0.643621228 | 4 | 99532481 | 100333334 |
| cheese-intake | PS | 0.0116665 | -0.71181 | 0.76474 | 0.000136108 | 0 | 0.88607 | 0.967565 | 0.992684493 | 4 | 102544804 | 104384534 |
| cheese-intake | PS | 0.278599 | -0.18304 | 0.9194 | 0.0776175 | 0 | 0.8493 | 0.215178 | 0.611637379 | 4 | 105319196 | 106479155 |
| cheese-intake | PS | -0.290955 | -0.95923 | 0.2288 | 0.084655 | 0 | 0.92813 | 0.242385 | 0.633303528 | 4 | 117313637 | 118395262 |
| cheese-intake | PS | 0.00418221 | -0.55325 | 0.56961 | 0.0000175 | 0 | 0.46798 | 0.98649 | 0.998059082 | 4 | 118395263 | 119138097 |
| cheese-intake | PS | 0.179477 | -0.63034 | 1 | 0.0322122 | 0 | 1 | 0.594933 | 0.856346927 | 4 | 119138098 | 119927262 |
| cheese-intake | PS | -0.568149 | -1 | 0.01794 | 0.322793 | 0 | 1 | 0.0547146 | 0.390434612 | 4 | 120563074 | 121393008 |
| cheese-intake | PS | 0.0522683 | -0.24858 | 0.35792 | 0.00273197 | 0 | 0.13794 | 0.72853 | 0.913389244 | 4 | 121981244 | 122655434 |
| cheese-intake | PS | -0.236819 | -0.79952 | 0.1853 | 0.0560831 | 0 | 0.64694 | 0.252128 | 0.640696318 | 4 | 122655435 | 123768693 |
| cheese-intake | PS | -0.219918 | -1 | 0.54775 | 0.048364 | 0 | 1 | 0.512827 | 0.822603387 | 4 | 127279172 | 128321876 |
| cheese-intake | PS | -0.265363 | -0.96118 | 0.28049 | 0.0704173 | 0 | 0.93106 | 0.308203 | 0.690461073 | 4 | 128321877 | 129625376 |
| cheese-intake | PS | -0.239555 | -0.97208 | 0.3215 | 0.0573868 | 0 | 0.95728 | 0.356123 | 0.732838572 | 4 | 129625377 | 131098950 |
| cheese-intake | PS | 0.15339 | -0.30967 | 0.6695 | 0.0235284 | 0 | 0.45608 | 0.494881 | 0.811042493 | 4 | 131098951 | 131873453 |
| cheese-intake | PS | -0.0426272 | -0.9197 | 0.75984 | 0.00181707 | 0 | 1 | 0.893951 | 0.971310138 | 4 | 134109979 | 135809542 |
| cheese-intake | PS | -0.122966 | -1 | 0.68232 | 0.0151206 | 0 | 1 | 0.70695 | 0.905249165 | 4 | 135809543 | 137400031 |
| cheese-intake | PS | -0.0821878 | -1 | 1 | 0.00675483 | 0 | 1 | 0.843726 | 0.95086581 | 4 | 138537345 | 139553760 |
| cheese-intake | PS | -0.00598021 | -0.70899 | 0.66624 | 0.0000358 | 0 | 0.78643 | 0.98244 | 0.996292185 | 4 | 141087048 | 142807914 |
| cheese-intake | PS | -0.0349628 | -0.48665 | 0.41425 | 0.00122239 | 0 | 0.2931 | 0.868847 | 0.959389156 | 4 | 149998529 | 151014322 |
| cheese-intake | PS | 0.213902 | -0.28978 | 0.84183 | 0.045754 | 0 | 0.72048 | 0.376162 | 0.744326334 | 4 | 152162099 | 153520883 |
| cheese-intake | PS | 0.230007 | -0.13274 | 0.64756 | 0.0529032 | 0 | 0.41999 | 0.214237 | 0.610690702 | 4 | 153520884 | 155044409 |
| cheese-intake | PS | -0.22763 | -0.70087 | 0.17477 | 0.0518154 | 0 | 0.49231 | 0.260693 | 0.645985626 | 4 | 155044410 | 156520288 |
| cheese-intake | PS | -0.0489824 | -0.49931 | 0.39313 | 0.00239927 | 0 | 0.28208 | 0.814283 | 0.944542385 | 4 | 157597310 | 159176073 |
| cheese-intake | PS | -0.26644 | -1 | 0.3307 | 0.0709903 | 0 | 1 | 0.344145 | 0.71819653 | 4 | 169555115 | 170682809 |
| cheese-intake | PS | 0.067856 | -0.3826 | 0.54103 | 0.00460444 | 0 | 0.30934 | 0.751524 | 0.922735859 | 4 | 170682810 | 171643019 |
| cheese-intake | PS | 0.0243482 | -0.61101 | 0.64803 | 0.000592836 | 0 | 0.64113 | 0.926183 | 0.980084322 | 4 | 174470207 | 175295842 |
| cheese-intake | PS | -0.271408 | -0.80256 | 0.18052 | 0.0736621 | 0 | 0.64411 | 0.218309 | 0.615142653 | 4 | 178314528 | 179233905 |
| cheese-intake | PS | 0.284207 | -0.26416 | 1 | 0.0807734 | 0 | 1 | 0.281249 | 0.668043079 | 4 | 181122434 | 182065646 |
| cheese-intake | PS | -0.092082 | -0.635 | 0.41067 | 0.0084791 | 0 | 0.42848 | 0.689508 | 0.900892552 | 4 | 182065647 | 182946258 |
| cheese-intake | PS | 0.0237402 | -0.39537 | 0.4288 | 0.000563599 | 0 | 0.23514 | 0.902213 | 0.973126703 | 4 | 182946259 | 183603892 |
| cheese-intake | PS | -0.199916 | -0.8934 | 0.37706 | 0.0399662 | 0 | 0.8227 | 0.448236 | 0.785321521 | 4 | 183603893 | 184338584 |
| cheese-intake | PS | 0.219314 | -0.10225 | 0.58033 | 0.0480988 | 0 | 0.33678 | 0.180319 | 0.584639921 | 4 | 184338585 | 185483262 |
| cheese-intake | PS | 0.174913 | -0.38005 | 0.86651 | 0.0305946 | 0 | 0.77245 | 0.502214 | 0.814819138 | 4 | 189899574 | 191043880 |
| cheese-intake | PS | -0.120392 | -0.5221 | 0.25116 | 0.0144944 | 0 | 0.27698 | 0.51847 | 0.822603387 | 5 | 1206610 | 2106885 |
| cheese-intake | PS | -0.086447 | -1 | 0.73746 | 0.00747308 | 0 | 1 | 0.799736 | 0.940560956 | 5 | 2106886 | 2960068 |
| cheese-intake | PS | 0.274091 | -0.41658 | 1 | 0.0751257 | 0 | 1 | 0.37198 | 0.744263178 | 5 | 4636543 | 5828694 |
| cheese-intake | PS | -0.570997 | -1 | -0.15576 | 0.326038 | 0.02462 | 1 | 0.00886626 | 0.224487887 | 5 | 5828695 | 6936733 |
| cheese-intake | PS | -0.33139 | -0.88605 | 0.11312 | 0.109819 | 0 | 0.78508 | 0.137866 | 0.540048903 | 5 | 6936734 | 8079415 |
| cheese-intake | PS | 0.129831 | -0.47082 | 0.85347 | 0.016856 | 0 | 0.80051 | 0.629649 | 0.870068479 | 5 | 8079416 | 9203855 |
| cheese-intake | PS | -0.207671 | -1 | 0.3725 | 0.0431272 | 0 | 1 | 0.448868 | 0.785639275 | 5 | 9203856 | 10549029 |
| cheese-intake | PS | -0.124738 | -0.57104 | 0.2858 | 0.0155597 | 0 | 0.33232 | 0.530701 | 0.83050765 | 5 | 10549030 | 11850850 |
| cheese-intake | PS | -0.437078 | -1 | 0.53906 | 0.191037 | 0 | 1 | 0.324244 | 0.704548295 | 5 | 14910296 | 16592319 |
| cheese-intake | PS | -0.376677 | -0.82201 | -0.012 | 0.141886 | 0.00194 | 0.67569 | 0.0411264 | 0.357174253 | 5 | 16592320 | 17803477 |
| cheese-intake | PS | -0.21769 | -0.86808 | 0.29221 | 0.0473891 | 0 | 0.76269 | 0.37709 | 0.744326334 | 5 | 30416067 | 31679464 |
| cheese-intake | PS | 0.647486 | 0.01407 | 1 | 0.419238 | 0.00546 | 1 | 0.0499086 | 0.375579465 | 5 | 35157147 | 36431967 |
| cheese-intake | PS | 0.0120173 | -0.33717 | 0.3601 | 0.000144415 | 0 | 0.16761 | 0.94284 | 0.986589264 | 5 | 37925488 | 39438985 |
| cheese-intake | PS | 0.0787226 | -0.76824 | 1 | 0.00619725 | 0 | 1 | 0.811492 | 0.944347553 | 5 | 40290852 | 41279590 |
| cheese-intake | PS | 0.128313 | -0.56597 | 0.96481 | 0.0164643 | 0 | 1 | 0.673688 | 0.89679545 | 5 | 44049879 | 45305566 |
| cheese-intake | PS | -0.0763888 | -0.72239 | 0.50136 | 0.00583525 | 0 | 0.59638 | 0.767626 | 0.928887186 | 5 | 55221399 | 55968966 |
| cheese-intake | PS | -0.0653381 | -0.59394 | 0.43602 | 0.00426907 | 0 | 0.39098 | 0.775933 | 0.929934281 | 5 | 55968967 | 56896890 |
| cheese-intake | PS | 0.406771 | 0.08018 | 0.79919 | 0.165462 | 0.00746 | 0.63871 | 0.0186824 | 0.287814709 | 5 | 58721459 | 59868567 |
| cheese-intake | PS | 0.0709031 | -0.28688 | 0.43498 | 0.00502725 | 0 | 0.19931 | 0.684958 | 0.900136915 | 5 | 60930754 | 62180368 |
| cheese-intake | PS | 0.289215 | -0.20788 | 0.88949 | 0.0836456 | 0 | 0.79381 | 0.220605 | 0.619941842 | 5 | 62180369 | 63214089 |
| cheese-intake | PS | 0.24562 | -0.28901 | 0.95359 | 0.0603291 | 0 | 0.91936 | 0.336095 | 0.713246439 | 5 | 65606871 | 67096191 |
| cheese-intake | PS | 0.201778 | -0.24863 | 0.7387 | 0.0407146 | 0 | 0.55117 | 0.362395 | 0.736639394 | 5 | 67096192 | 68006993 |
| cheese-intake | PS | 0.187605 | -0.19572 | 0.59101 | 0.0351956 | 0 | 0.34929 | 0.325079 | 0.70545383 | 5 | 71468652 | 73314061 |
| cheese-intake | PS | -0.177242 | -1 | 0.49788 | 0.0314146 | 0 | 1 | 0.547854 | 0.842812607 | 5 | 75239303 | 75959515 |
| cheese-intake | PS | -0.246849 | -0.55704 | 0.04192 | 0.0609343 | 0 | 0.31029 | 0.0909559 | 0.478016906 | 5 | 75959516 | 77290255 |
| cheese-intake | PS | -0.451864 | -1 | 0.20063 | 0.204181 | 0 | 1 | 0.149773 | 0.55216732 | 5 | 77290256 | 79005158 |
| cheese-intake | PS | 0.102615 | -0.32136 | 0.5697 | 0.0105298 | 0 | 0.34124 | 0.619296 | 0.867109031 | 5 | 82720249 | 84094797 |
| cheese-intake | PS | 0.808774 | 0.46494 | 1 | 0.654115 | 0.21617 | 1 | 0.0000309 | 0.025214337 | 5 | 87943483 | 89584466 |
| cheese-intake | PS | -0.00705317 | -1 | 1 | 0.0000497 | 0 | 1 | 0.985482 | 0.998010608 | 5 | 90793805 | 91956905 |
| cheese-intake | PS | 0.157159 | -0.33096 | 0.73037 | 0.0246991 | 0 | 0.56366 | 0.48938 | 0.806415277 | 5 | 91956906 | 93814604 |
| cheese-intake | PS | 0.431886 | -0.53236 | 1 | 0.186526 | 0 | 1 | 0.314715 | 0.695891758 | 5 | 93814605 | 95117259 |
| cheese-intake | PS | 0.163088 | -0.25046 | 0.63013 | 0.0265976 | 0 | 0.40211 | 0.426053 | 0.772599009 | 5 | 95117260 | 96467377 |
| cheese-intake | PS | -0.301091 | -1 | 0.19005 | 0.090656 | 0 | 1 | 0.21207 | 0.609154919 | 5 | 117348498 | 118605251 |
| cheese-intake | PS | -0.801857 | -1 | -0.19727 | 0.642974 | 0.0408 | 1 | 0.0142118 | 0.269716852 | 5 | 120371858 | 120960737 |
| cheese-intake | PS | -0.599929 | -1 | 0.01662 | 0.359915 | 0 | 1 | 0.0581858 | 0.402808045 | 5 | 122005292 | 123191941 |
| cheese-intake | PS | 0.0863761 | -0.27537 | 0.47195 | 0.00746083 | 0 | 0.2305 | 0.624796 | 0.868930667 | 5 | 123191942 | 124109485 |
| cheese-intake | PS | -0.196552 | -0.83789 | 0.33707 | 0.0386327 | 0 | 0.72632 | 0.436397 | 0.77623651 | 5 | 125131721 | 126054697 |
| cheese-intake | PS | 0.275314 | -0.29009 | 1 | 0.075798 | 0 | 1 | 0.313157 | 0.695891758 | 5 | 128734906 | 130573817 |
| cheese-intake | PS | -0.18539 | -0.48527 | 0.09199 | 0.0343695 | 0 | 0.23572 | 0.189719 | 0.596557161 | 5 | 130573818 | 132554690 |
| cheese-intake | PS | 0.0670119 | -0.19606 | 0.3307 | 0.00449059 | 0 | 0.1111 | 0.607767 | 0.861157059 | 5 | 132554691 | 134556570 |
| cheese-intake | PS | -0.0474436 | -0.59042 | 0.45706 | 0.00225089 | 0 | 0.41226 | 0.836149 | 0.948975213 | 5 | 135344944 | 136949853 |
| cheese-intake | PS | 0.0153361 | -0.3982 | 0.42807 | 0.000235196 | 0 | 0.23492 | 0.935692 | 0.982627033 | 5 | 139408117 | 141253830 |
| cheese-intake | PS | -0.291327 | -0.6749 | 0.04629 | 0.0848712 | 0 | 0.45549 | 0.0854983 | 0.468519208 | 5 | 141253831 | 142532956 |
| cheese-intake | PS | 0.250387 | -0.29988 | 0.94877 | 0.0626938 | 0 | 0.90016 | 0.33445 | 0.713246439 | 5 | 145319097 | 147180171 |
| cheese-intake | PS | -0.607729 | -1 | 0.04999 | 0.369334 | 0 | 1 | 0.0704044 | 0.439657305 | 5 | 147180172 | 148662214 |
| cheese-intake | PS | -0.421192 | -0.93574 | -0.01357 | 0.177403 | 0.00322 | 0.87561 | 0.0427892 | 0.35870143 | 5 | 148662215 | 149850203 |
| cheese-intake | PS | 0.119025 | -0.1541 | 0.41575 | 0.0141669 | 0 | 0.17304 | 0.374165 | 0.744326334 | 5 | 149850204 | 150981934 |
| cheese-intake | PS | -0.302049 | -1 | 0.50706 | 0.0912336 | 0 | 1 | 0.389846 | 0.754287344 | 5 | 151892618 | 152878627 |
| cheese-intake | PS | 0.516835 | -0.00799 | 1 | 0.267118 | 0 | 1 | 0.0512726 | 0.378238925 | 5 | 152878628 | 153734494 |
| cheese-intake | PS | -0.530876 | -1 | 0.4335 | 0.281829 | 0 | 1 | 0.23579 | 0.624200355 | 5 | 155459557 | 156345451 |
| cheese-intake | PS | 0.228808 | -0.11879 | 0.69516 | 0.0523529 | 0 | 0.48481 | 0.18044 | 0.584639921 | 5 | 157191082 | 158484775 |
| cheese-intake | PS | -0.233559 | -0.49116 | -0.00655 | 0.0545499 | 0.00073 | 0.24124 | 0.0376588 | 0.351281893 | 5 | 158484776 | 159663733 |
| cheese-intake | PS | -0.632856 | -1 | -0.21622 | 0.400506 | 0.04699 | 1 | 0.00530895 | 0.19703444 | 5 | 159663734 | 160519049 |
| cheese-intake | PS | 0.426043 | -0.33792 | 1 | 0.181513 | 0 | 1 | 0.242294 | 0.633303528 | 5 | 160519050 | 161478177 |
| cheese-intake | PS | -0.509758 | -1 | 0.28505 | 0.259853 | 0 | 1 | 0.176748 | 0.582296617 | 5 | 161478178 | 162386027 |
| cheese-intake | PS | -0.0610802 | -0.5501 | 0.41232 | 0.0037308 | 0 | 0.3426 | 0.770917 | 0.92959111 | 5 | 165289212 | 166863413 |
| cheese-intake | PS | -0.509671 | -1 | -0.08905 | 0.259764 | 0.00939 | 1 | 0.0195884 | 0.292402657 | 5 | 166863414 | 168342743 |
| cheese-intake | PS | -0.320456 | -1 | 0.27562 | 0.102692 | 0 | 1 | 0.252754 | 0.640696318 | 5 | 168342744 | 169506966 |
| cheese-intake | PS | -0.0947591 | -0.57502 | 0.36551 | 0.00897928 | 0 | 0.35566 | 0.658749 | 0.890142422 | 5 | 169506967 | 170898340 |
| cheese-intake | PS | -0.278526 | -0.88686 | 0.18989 | 0.0775768 | 0 | 0.78651 | 0.223869 | 0.620938095 | 5 | 173606996 | 174662885 |
| cheese-intake | PS | -0.501151 | -1 | -0.03468 | 0.251153 | 0.00595 | 1 | 0.0322118 | 0.331485648 | 5 | 174662886 | 176180301 |
| cheese-intake | PS | -0.189417 | -0.49429 | 0.09399 | 0.0358787 | 0 | 0.24433 | 0.191135 | 0.596557161 | 5 | 176180302 | 177659902 |
| cheese-intake | PS | 0.174559 | -0.53765 | 1 | 0.030471 | 0 | 1 | 0.573686 | 0.850503167 | 5 | 177659903 | 178595252 |
| cheese-intake | PS | -0.159359 | -0.43644 | 0.10814 | 0.0253953 | 0 | 0.19048 | 0.23634 | 0.624503592 | 6 | 63979 | 1380679 |
| cheese-intake | PS | 0.186037 | -0.30239 | 0.74478 | 0.0346098 | 0 | 0.55807 | 0.417543 | 0.767893591 | 6 | 5378214 | 6621937 |
| cheese-intake | PS | -0.125996 | -0.9847 | 0.52293 | 0.0158749 | 0 | 1 | 0.656823 | 0.888469657 | 6 | 6621938 | 7808323 |
| cheese-intake | PS | 0.125182 | -0.36019 | 0.6704 | 0.0156705 | 0 | 0.47939 | 0.577876 | 0.852843658 | 6 | 9020711 | 10416550 |
| cheese-intake | PS | 0.21451 | -0.38681 | 0.98683 | 0.0460147 | 0 | 1 | 0.436493 | 0.77623651 | 6 | 10416551 | 11790671 |
| cheese-intake | PS | -0.37464 | -0.93118 | 0.05352 | 0.140355 | 0 | 0.86709 | 0.0841363 | 0.463388121 | 6 | 11790672 | 13352326 |
| cheese-intake | PS | 0.0302392 | -0.53078 | 0.61931 | 0.000914411 | 0 | 0.526 | 0.900681 | 0.973080262 | 6 | 13352327 | 15069421 |
| cheese-intake | PS | 0.433572 | 0.09155 | 0.86892 | 0.187984 | 0.00922 | 0.75502 | 0.0176477 | 0.283368889 | 6 | 15069422 | 16566882 |
| cheese-intake | PS | -0.658508 | -1 | -0.18734 | 0.433633 | 0.03644 | 1 | 0.00994944 | 0.2403776 | 6 | 16566883 | 17391994 |
| cheese-intake | PS | 0.0974989 | -0.41906 | 0.67473 | 0.00950604 | 0 | 0.51084 | 0.679039 | 0.897275367 | 6 | 18775023 | 19449152 |
| cheese-intake | PS | 0.385205 | 0.02575 | 0.82675 | 0.148383 | 0.00264 | 0.68351 | 0.0413386 | 0.357174253 | 6 | 19449153 | 20418020 |
| cheese-intake | PS | 0.197633 | -0.12259 | 0.54697 | 0.0390586 | 0 | 0.29918 | 0.223531 | 0.620938095 | 6 | 20418021 | 21295864 |
| cheese-intake | PS | 0.198991 | -0.12386 | 0.58137 | 0.0395975 | 0 | 0.33799 | 0.218372 | 0.615142653 | 6 | 21295865 | 22199713 |
| cheese-intake | PS | -0.0354924 | -0.39921 | 0.3221 | 0.00125971 | 0 | 0.18212 | 0.836692 | 0.948975213 | 6 | 22199714 | 23192337 |
| cheese-intake | PS | 0.215888 | -0.15136 | 0.67449 | 0.0466077 | 0 | 0.45494 | 0.228259 | 0.620938095 | 6 | 23192338 | 23939306 |
| cheese-intake | PS | -0.0424927 | -0.36746 | 0.26221 | 0.00180563 | 0 | 0.15283 | 0.771002 | 0.92959111 | 6 | 23939307 | 24950379 |
| cheese-intake | PS | 0.338994 | -0.01383 | 1 | 0.114917 | 0 | 1 | 0.0637543 | 0.419256682 | 6 | 24950380 | 25684629 |
| cheese-intake | PS | 0.153181 | -0.09015 | 0.40692 | 0.0234643 | 0 | 0.16559 | 0.20728 | 0.604688236 | 6 | 25684630 | 26396200 |
| cheese-intake | PS | 0.0547777 | -0.27106 | 0.39733 | 0.00300059 | 0 | 0.17413 | 0.721667 | 0.909521779 | 6 | 26396201 | 27261035 |
| cheese-intake | PS | -0.0385488 | -0.2524 | 0.1674 | 0.00148601 | 0 | 0.06809 | 0.719145 | 0.907896239 | 6 | 27261036 | 28666364 |
| cheese-intake | PS | -0.345012 | -0.90719 | 0.01558 | 0.119033 | 0 | 0.823 | 0.0618599 | 0.413158351 | 6 | 29529756 | 29833843 |
| cheese-intake | PS | -0.464343 | -1 | -0.01001 | 0.215615 | 0.00387 | 1 | 0.0486117 | 0.373576347 | 6 | 29833844 | 30070717 |
| cheese-intake | PS | -0.0951102 | -0.56097 | 0.29165 | 0.00904595 | 0 | 0.33217 | 0.594138 | 0.856160011 | 6 | 30070718 | 30715006 |
| cheese-intake | PS | -0.0756048 | -0.28541 | 0.12914 | 0.00571609 | 0 | 0.08246 | 0.469116 | 0.79746306 | 6 | 31427210 | 32208901 |
| cheese-intake | PS | -0.0905053 | -0.57144 | 0.38913 | 0.00819121 | 0 | 0.34459 | 0.68796 | 0.900892552 | 6 | 32454578 | 32539567 |
| cheese-intake | PS | 0.00315797 | -0.28241 | 0.29016 | 0.00000997 | 0 | 0.10966 | 0.981481 | 0.996292185 | 6 | 32539568 | 32586784 |
| cheese-intake | PS | -0.0612263 | -0.27909 | 0.15505 | 0.00374866 | 0 | 0.08046 | 0.573047 | 0.850422201 | 6 | 32586785 | 32629239 |
| cheese-intake | PS | -0.144208 | -0.68262 | 0.24021 | 0.020796 | 0 | 0.48782 | 0.421312 | 0.768288661 | 6 | 33194976 | 33864262 |
| cheese-intake | PS | -0.15603 | -0.34278 | 0.02623 | 0.0243453 | 0 | 0.1175 | 0.0872779 | 0.473504354 | 6 | 33864263 | 34979270 |
| cheese-intake | PS | -0.274365 | -0.65188 | 0.04775 | 0.0752764 | 0 | 0.42495 | 0.0899885 | 0.478016906 | 6 | 34979271 | 36346353 |
| cheese-intake | PS | -0.0217912 | -0.52295 | 0.46935 | 0.000474858 | 0 | 0.39089 | 0.917926 | 0.977166335 | 6 | 36346354 | 37570051 |
| cheese-intake | PS | -0.0190546 | -0.56125 | 0.52377 | 0.000363079 | 0 | 0.4709 | 0.932334 | 0.981625675 | 6 | 37570052 | 38688720 |
| cheese-intake | PS | -0.115954 | -0.50934 | 0.25797 | 0.0134454 | 0 | 0.26373 | 0.521698 | 0.823281169 | 6 | 38688721 | 39785907 |
| cheese-intake | PS | 0.0195802 | -0.3728 | 0.41003 | 0.000383384 | 0 | 0.20209 | 0.916923 | 0.977166335 | 6 | 39785908 | 40778401 |
| cheese-intake | PS | -0.179244 | -1 | 0.48343 | 0.0321283 | 0 | 1 | 0.545986 | 0.841727194 | 6 | 40778402 | 42103738 |
| cheese-intake | PS | -0.344312 | -1 | 0.26539 | 0.118551 | 0 | 1 | 0.240936 | 0.632045764 | 6 | 42103739 | 43770626 |
| cheese-intake | PS | -0.29782 | -0.6465 | 0.00152 | 0.0886965 | 0 | 0.41796 | 0.0590063 | 0.405714896 | 6 | 43770627 | 44596897 |
| cheese-intake | PS | -0.320405 | -0.62286 | -0.04008 | 0.102659 | 0.00296 | 0.38796 | 0.027115 | 0.305371 | 6 | 45408422 | 46430701 |
| cheese-intake | PS | -0.387245 | -0.85649 | -0.02141 | 0.149959 | 0.00266 | 0.73357 | 0.0463844 | 0.366783605 | 6 | 46430702 | 47313443 |
| cheese-intake | PS | 0.579384 | 0.13888 | 1 | 0.335685 | 0.01999 | 1 | 0.0123259 | 0.258053778 | 6 | 47313444 | 48393981 |
| cheese-intake | PS | -0.00832361 | -0.56578 | 0.54661 | 0.0000693 | 0 | 0.42858 | 0.972674 | 0.994031669 | 6 | 50940768 | 51826423 |
| cheese-intake | PS | -0.0273762 | -0.41459 | 0.36379 | 0.000749454 | 0 | 0.20819 | 0.882372 | 0.965761891 | 6 | 51826424 | 52598879 |
| cheese-intake | PS | -0.203983 | -0.74892 | 0.26201 | 0.0416091 | 0 | 0.56582 | 0.371203 | 0.743772391 | 6 | 52598880 | 53425492 |
| cheese-intake | PS | -0.296666 | -0.75978 | 0.10074 | 0.088011 | 0 | 0.57797 | 0.142044 | 0.544689833 | 6 | 53425493 | 54452767 |
| cheese-intake | PS | -0.496142 | -1 | 0.10981 | 0.246157 | 0 | 1 | 0.0905826 | 0.478016906 | 6 | 54452768 | 55469137 |
| cheese-intake | PS | -0.276428 | -0.78028 | 0.12992 | 0.0764125 | 0 | 0.60942 | 0.17491 | 0.582296617 | 6 | 56200986 | 57316157 |
| cheese-intake | PS | 0.265554 | -0.13204 | 0.68106 | 0.0705187 | 0 | 0.46433 | 0.178427 | 0.582803181 | 6 | 57316158 | 58141889 |
| cheese-intake | PS | -0.0555435 | -0.56868 | 0.43893 | 0.00308508 | 0 | 0.37568 | 0.809381 | 0.943074686 | 6 | 58141890 | 61883560 |
| cheese-intake | PS | 0.392213 | 0.03371 | 0.7844 | 0.153831 | 0.00317 | 0.61528 | 0.036687 | 0.35091556 | 6 | 61883561 | 62693128 |
| cheese-intake | PS | -0.112124 | -0.50304 | 0.237 | 0.0125719 | 0 | 0.25983 | 0.516658 | 0.822603387 | 6 | 62693129 | 64010286 |
| cheese-intake | PS | -0.346195 | -0.96202 | 0.11614 | 0.119851 | 0 | 0.92548 | 0.133703 | 0.538438962 | 6 | 64010287 | 65759861 |
| cheese-intake | PS | 0.117677 | -0.49117 | 0.82699 | 0.013848 | 0 | 0.76503 | 0.669558 | 0.89492409 | 6 | 65759862 | 66445495 |
| cheese-intake | PS | 0.351694 | -0.09032 | 0.89375 | 0.123688 | 0 | 0.79878 | 0.116191 | 0.516275157 | 6 | 66445496 | 67036787 |
| cheese-intake | PS | 0.920798 | 0.15727 | 1 | 0.847868 | 0.03221 | 1 | 0.0229053 | 0.299330206 | 6 | 67036788 | 67559694 |
| cheese-intake | PS | 0.529602 | -0.17824 | 1 | 0.280478 | 0 | 1 | 0.132016 | 0.53799409 | 6 | 67559695 | 68547494 |
| cheese-intake | PS | 0.576316 | 0.12353 | 1 | 0.33214 | 0.01676 | 1 | 0.0134253 | 0.265317787 | 6 | 73170169 | 74401506 |
| cheese-intake | PS | 0.0167018 | -0.71409 | 0.77083 | 0.000278949 | 0 | 0.85648 | 0.955919 | 0.989550382 | 6 | 75461314 | 77274030 |
| cheese-intake | PS | 0.281475 | -0.51462 | 1 | 0.0792279 | 0 | 1 | 0.430725 | 0.772599009 | 6 | 79859904 | 80693927 |
| cheese-intake | PS | -0.0207643 | -0.78506 | 0.75183 | 0.000431156 | 0 | 0.91177 | 0.946165 | 0.987907574 | 6 | 85837204 | 86818669 |
| cheese-intake | PS | 0.271595 | -0.19515 | 0.83737 | 0.0737639 | 0 | 0.70475 | 0.228894 | 0.620938095 | 6 | 88499746 | 89974267 |
| cheese-intake | PS | -0.0865018 | -0.79847 | 0.55409 | 0.00748256 | 0 | 0.71917 | 0.755891 | 0.923275238 | 6 | 91097025 | 92015279 |
| cheese-intake | PS | -0.245452 | -0.86057 | 0.2462 | 0.0602466 | 0 | 0.74746 | 0.297722 | 0.68293115 | 6 | 93696826 | 95176337 |
| cheese-intake | PS | -0.0500022 | -0.70175 | 0.56813 | 0.00250022 | 0 | 0.60626 | 0.850773 | 0.955373322 | 6 | 95176338 | 96480153 |
| cheese-intake | PS | 0.28588 | -0.46988 | 1 | 0.0817273 | 0 | 1 | 0.406348 | 0.764477286 | 6 | 96480154 | 98173003 |
| cheese-intake | PS | -0.151454 | -0.62509 | 0.2849 | 0.0229383 | 0 | 0.39523 | 0.471109 | 0.797472807 | 6 | 98173004 | 99678876 |
| cheese-intake | PS | -0.169248 | -0.86684 | 0.41708 | 0.0286448 | 0 | 0.77652 | 0.52859 | 0.828158915 | 6 | 101793543 | 102637706 |
| cheese-intake | PS | -0.0246105 | -0.34668 | 0.30025 | 0.000605674 | 0 | 0.1398 | 0.877304 | 0.964089793 | 6 | 104951345 | 106053915 |
| cheese-intake | PS | -0.126393 | -0.51715 | 0.1983 | 0.0159751 | 0 | 0.27868 | 0.419483 | 0.767893591 | 6 | 106053916 | 107309327 |
| cheese-intake | PS | 0.48817 | -0.00653 | 1 | 0.23831 | 0 | 1 | 0.0540058 | 0.388508685 | 6 | 107309328 | 109043244 |
| cheese-intake | PS | -0.0256552 | -0.43042 | 0.38176 | 0.000658187 | 0 | 0.22469 | 0.893834 | 0.971310138 | 6 | 109043245 | 110647842 |
| cheese-intake | PS | -0.0406685 | -0.98084 | 0.81125 | 0.00165393 | 0 | 1 | 0.901714 | 0.973080262 | 6 | 110647843 | 111363443 |
| cheese-intake | PS | 0.450198 | 0.09811 | 1 | 0.202678 | 0.01072 | 1 | 0.0166384 | 0.280108322 | 6 | 111363444 | 112342873 |
| cheese-intake | PS | -0.38001 | -0.83458 | -0.0129 | 0.144407 | 0.00175 | 0.69652 | 0.0414834 | 0.357479642 | 6 | 112342874 | 113705003 |
| cheese-intake | PS | 0.36971 | -0.11535 | 1 | 0.136686 | 0 | 1 | 0.125907 | 0.529965172 | 6 | 113705004 | 115062811 |
| cheese-intake | PS | 0.113092 | -0.41305 | 0.69345 | 0.0127898 | 0 | 0.53742 | 0.626747 | 0.868930667 | 6 | 122929291 | 123854857 |
| cheese-intake | PS | -0.0765876 | -0.59131 | 0.41255 | 0.00586567 | 0 | 0.39599 | 0.735086 | 0.917848257 | 6 | 123854858 | 125365054 |
| cheese-intake | PS | -0.308145 | -1 | 0.27078 | 0.0949536 | 0 | 1 | 0.257804 | 0.643621228 | 6 | 125365055 | 127545459 |
| cheese-intake | PS | -0.451514 | -1 | 0.20232 | 0.203865 | 0 | 1 | 0.160777 | 0.574093371 | 6 | 129850179 | 130550137 |
| cheese-intake | PS | -0.0612086 | -0.64868 | 0.50991 | 0.00374649 | 0 | 0.49854 | 0.808321 | 0.942903878 | 6 | 130550138 | 131457164 |
| cheese-intake | PS | -0.876118 | -1 | -0.31505 | 0.767583 | 0.09926 | 1 | 0.00308101 | 0.167709644 | 6 | 131457165 | 132890694 |
| cheese-intake | PS | -0.397505 | -1 | 0.30686 | 0.158011 | 0 | 1 | 0.237189 | 0.626240319 | 6 | 132890695 | 134313643 |
| cheese-intake | PS | -0.324143 | -1 | 0.17113 | 0.105069 | 0 | 1 | 0.17833 | 0.582803181 | 6 | 134313644 | 135544083 |
| cheese-intake | PS | -0.00373326 | -0.30203 | 0.29667 | 0.0000139 | 0 | 0.12089 | 0.979862 | 0.996292185 | 6 | 135544084 | 137553212 |
| cheese-intake | PS | 0.175346 | -0.07825 | 0.46698 | 0.0307463 | 0 | 0.21807 | 0.177278 | 0.582296617 | 6 | 137553213 | 138825721 |
| cheese-intake | PS | 0.0386066 | -0.34402 | 0.43622 | 0.00149047 | 0 | 0.20874 | 0.835439 | 0.948975213 | 6 | 138825722 | 139716713 |
| cheese-intake | PS | -0.0306388 | -0.76888 | 0.63787 | 0.000938735 | 0 | 0.76312 | 0.915314 | 0.977166335 | 6 | 139716714 | 141449453 |
| cheese-intake | PS | 0.392838 | -0.04421 | 0.97846 | 0.154322 | 0 | 0.95739 | 0.0723351 | 0.443239093 | 6 | 143083348 | 144791455 |
| cheese-intake | PS | -0.119523 | -1 | 0.9608 | 0.0142858 | 0 | 1 | 0.764517 | 0.928331968 | 6 | 145778283 | 147015882 |
| cheese-intake | PS | 0.139944 | -0.31545 | 0.63305 | 0.0195843 | 0 | 0.41041 | 0.520072 | 0.822603387 | 6 | 151629955 | 152376499 |
| cheese-intake | PS | -0.24414 | -0.78041 | 0.20582 | 0.0596045 | 0 | 0.60904 | 0.278121 | 0.663508536 | 6 | 152376500 | 153082361 |
| cheese-intake | PS | -0.310128 | -0.82437 | 0.1093 | 0.0961793 | 0 | 0.67959 | 0.148031 | 0.550971968 | 6 | 153082362 | 153791461 |
| cheese-intake | PS | -0.00689637 | -0.53697 | 0.50276 | 0.0000476 | 0 | 0.37384 | 0.976408 | 0.995923963 | 6 | 154462011 | 155523957 |
| cheese-intake | PS | -0.308627 | -0.70223 | 0.03689 | 0.0952504 | 0 | 0.49312 | 0.0834086 | 0.462902545 | 6 | 155523958 | 156762740 |
| cheese-intake | PS | -0.0310646 | -0.40445 | 0.34672 | 0.000965012 | 0 | 0.19524 | 0.862753 | 0.958085094 | 6 | 156762741 | 158220143 |
| cheese-intake | PS | 0.00402997 | -0.60967 | 0.6034 | 0.0000162 | 0 | 0.54621 | 0.987669 | 0.998059082 | 6 | 158220144 | 158952060 |
| cheese-intake | PS | 0.084513 | -0.26269 | 0.43418 | 0.00714245 | 0 | 0.195 | 0.612813 | 0.863169606 | 6 | 158952061 | 159604052 |
| cheese-intake | PS | 0.445603 | 0.073 | 0.94382 | 0.198562 | 0.0067 | 0.89079 | 0.0240569 | 0.303629549 | 6 | 161371015 | 162254229 |
| cheese-intake | PS | -0.378629 | -1 | 0.2282 | 0.14336 | 0 | 1 | 0.195141 | 0.599718098 | 6 | 162254230 | 163336361 |
| cheese-intake | PS | -0.00365757 | -0.75669 | 0.76247 | 0.0000134 | 0 | 0.96738 | 0.990023 | 0.998310357 | 6 | 163336362 | 164687462 |
| cheese-intake | PS | -0.153058 | -0.78286 | 0.36668 | 0.0234267 | 0 | 0.63972 | 0.52611 | 0.826888961 | 6 | 164687463 | 165835953 |
| cheese-intake | PS | -0.388023 | -1 | 0.05837 | 0.150562 | 0 | 1 | 0.082912 | 0.462902545 | 6 | 165835954 | 166853325 |
| cheese-intake | PS | -0.300658 | -1 | 0.40074 | 0.0903955 | 0 | 1 | 0.349362 | 0.725669948 | 6 | 166853326 | 167714865 |
| cheese-intake | PS | -0.193399 | -0.64409 | 0.22792 | 0.0374033 | 0 | 0.41557 | 0.336085 | 0.713246439 | 6 | 168707339 | 169667886 |
| cheese-intake | PS | 0.436427 | 0.10366 | 0.82337 | 0.190469 | 0.01087 | 0.67794 | 0.0111711 | 0.251619397 | 6 | 169667887 | 171053405 |
| cheese-intake | PS | -1 | -1 | -0.3795 | 1 | 0.14402 | 1 | 0.00222198 | 0.145139734 | 7 | 617320 | 1366972 |
| cheese-intake | PS | -0.546354 | -1 | -0.12467 | 0.298503 | 0.01718 | 1 | 0.0136144 | 0.265317787 | 7 | 1366973 | 2473749 |
| cheese-intake | PS | -0.0573988 | -0.51396 | 0.38453 | 0.00329462 | 0 | 0.29472 | 0.785656 | 0.933113527 | 7 | 2473750 | 3100211 |
| cheese-intake | PS | 0.254558 | -0.25317 | 0.93028 | 0.0647997 | 0 | 0.87324 | 0.299014 | 0.68465469 | 7 | 3100212 | 4139431 |
| cheese-intake | PS | 0.0140828 | -0.30363 | 0.33033 | 0.000198326 | 0 | 0.1561 | 0.91419 | 0.977166335 | 7 | 4938443 | 6020653 |
| cheese-intake | PS | -0.0930197 | -0.48367 | 0.25665 | 0.00865267 | 0 | 0.24844 | 0.554074 | 0.843974883 | 7 | 6020654 | 6716905 |
| cheese-intake | PS | 0.0842072 | -0.30254 | 0.49135 | 0.00709085 | 0 | 0.24852 | 0.660859 | 0.891007394 | 7 | 9900802 | 10481677 |
| cheese-intake | PS | -0.173213 | -0.98291 | 0.49484 | 0.0300026 | 0 | 1 | 0.557678 | 0.844402572 | 7 | 10481678 | 11232447 |
| cheese-intake | PS | -0.0550757 | -0.77983 | 0.63653 | 0.00303333 | 0 | 0.85294 | 0.843695 | 0.95086581 | 7 | 11232448 | 11855413 |
| cheese-intake | PS | 0.234142 | -0.14619 | 0.67967 | 0.0548224 | 0 | 0.46195 | 0.221665 | 0.620938095 | 7 | 16739014 | 17596578 |
| cheese-intake | PS | -0.691286 | -1 | -0.03645 | 0.477876 | 0.00942 | 1 | 0.0442304 | 0.360793635 | 7 | 20122180 | 21390644 |
| cheese-intake | PS | -0.762944 | -1 | -0.14233 | 0.582084 | 0.0262 | 1 | 0.0203389 | 0.292402657 | 7 | 21390645 | 22165060 |
| cheese-intake | PS | -0.42628 | -1 | 0.19868 | 0.181715 | 0 | 1 | 0.163351 | 0.574566392 | 7 | 22165061 | 23106680 |
| cheese-intake | PS | -0.210323 | -1 | 0.57578 | 0.0442359 | 0 | 1 | 0.524349 | 0.826507642 | 7 | 23106681 | 24151099 |
| cheese-intake | PS | -0.661706 | -1 | 0.04139 | 0.437855 | 0 | 1 | 0.0668136 | 0.427869054 | 7 | 24151100 | 24894119 |
| cheese-intake | PS | -0.67893 | -1 | -0.15817 | 0.460946 | 0.02703 | 1 | 0.0136477 | 0.265317787 | 7 | 28890887 | 30175113 |
| cheese-intake | PS | -0.271861 | -1 | 0.28375 | 0.0739084 | 0 | 1 | 0.303759 | 0.687150579 | 7 | 33159278 | 34114532 |
| cheese-intake | PS | 0.35009 | 0.00877 | 0.76591 | 0.122563 | 0.00208 | 0.58662 | 0.0476551 | 0.370575135 | 7 | 36507691 | 37981936 |
| cheese-intake | PS | -0.0624508 | -0.48114 | 0.34211 | 0.00390011 | 0 | 0.2495 | 0.7485 | 0.922342547 | 7 | 38966484 | 40261240 |
| cheese-intake | PS | -0.0552228 | -0.5699 | 0.42159 | 0.00304956 | 0 | 0.37132 | 0.80289 | 0.941469324 | 7 | 40261241 | 41415925 |
| cheese-intake | PS | -0.393654 | -1 | 0.19461 | 0.154964 | 0 | 1 | 0.162339 | 0.574155024 | 7 | 43448816 | 44989571 |
| cheese-intake | PS | 0.0753383 | -0.75986 | 0.99657 | 0.00567587 | 0 | 1 | 0.822343 | 0.944550594 | 7 | 44989572 | 46247335 |
| cheese-intake | PS | -0.245535 | -0.97161 | 0.28405 | 0.0602874 | 0 | 0.95626 | 0.335699 | 0.713246439 | 7 | 46247336 | 47253454 |
| cheese-intake | PS | 0.179049 | -0.37163 | 0.80853 | 0.0320586 | 0 | 0.67095 | 0.482052 | 0.802193156 | 7 | 47253455 | 48363585 |
| cheese-intake | PS | -0.3055 | -0.74755 | 0.06244 | 0.09333 | 0 | 0.55883 | 0.109891 | 0.508421114 | 7 | 49632427 | 50894508 |
| cheese-intake | PS | 0.343883 | 0.02296 | 0.7186 | 0.118255 | 0.00251 | 0.51638 | 0.0412593 | 0.357174253 | 7 | 50894509 | 51951647 |
| cheese-intake | PS | -0.324374 | -1 | 0.3057 | 0.105218 | 0 | 1 | 0.275712 | 0.661111191 | 7 | 51951648 | 52635123 |
| cheese-intake | PS | -0.213286 | -1 | 0.64239 | 0.0454908 | 0 | 1 | 0.554503 | 0.843974883 | 7 | 54086988 | 54550500 |
| cheese-intake | PS | -0.165787 | -1 | 0.5338 | 0.0274853 | 0 | 1 | 0.601404 | 0.858848038 | 7 | 54550501 | 55161394 |
| cheese-intake | PS | -0.0837223 | -0.68201 | 0.47448 | 0.00700942 | 0 | 0.50538 | 0.739153 | 0.918597298 | 7 | 55161395 | 56303513 |
| cheese-intake | PS | -0.479846 | -1 | 0.24525 | 0.230253 | 0 | 1 | 0.182995 | 0.587671259 | 7 | 67474723 | 68569224 |
| cheese-intake | PS | -0.00983579 | -0.50452 | 0.49406 | 0.0000967 | 0 | 0.35371 | 0.965607 | 0.992657369 | 7 | 68569225 | 70144614 |
| cheese-intake | PS | -0.518337 | -1 | 0.0627 | 0.268673 | 0 | 1 | 0.0812336 | 0.460358212 | 7 | 70144615 | 71215741 |
| cheese-intake | PS | -0.177203 | -1 | 0.49521 | 0.0314008 | 0 | 1 | 0.539606 | 0.836646275 | 7 | 75243900 | 76451928 |
| cheese-intake | PS | 0.386839 | -0.12722 | 1 | 0.149644 | 0 | 1 | 0.125315 | 0.529965172 | 7 | 76451929 | 77663964 |
| cheese-intake | PS | -0.0785667 | -0.85272 | 0.62309 | 0.00617273 | 0 | 0.90478 | 0.785114 | 0.933113527 | 7 | 77663965 | 78685009 |
| cheese-intake | PS | 0.274026 | -0.14444 | 0.78107 | 0.0750905 | 0 | 0.6106 | 0.192472 | 0.596973934 | 7 | 80055722 | 81533566 |
| cheese-intake | PS | 0.137193 | -0.23989 | 0.54652 | 0.0188219 | 0 | 0.3019 | 0.45969 | 0.792607357 | 7 | 81533567 | 82759283 |
| cheese-intake | PS | -0.170938 | -0.63476 | 0.18286 | 0.0292197 | 0 | 0.40756 | 0.32825 | 0.707166557 | 7 | 89330088 | 90660831 |
| cheese-intake | PS | 0.105431 | -0.33391 | 0.56017 | 0.0111157 | 0 | 0.32879 | 0.612142 | 0.86286395 | 7 | 90660832 | 92530165 |
| cheese-intake | PS | 0.142284 | -0.10793 | 0.39365 | 0.0202446 | 0 | 0.15496 | 0.252809 | 0.640696318 | 7 | 92530166 | 93691725 |
| cheese-intake | PS | -0.117278 | -1 | 0.61122 | 0.0137542 | 0 | 1 | 0.70461 | 0.904676873 | 7 | 95174848 | 96564981 |
| cheese-intake | PS | -0.416699 | -1 | 0.09654 | 0.173638 | 0 | 1 | 0.108619 | 0.507510235 | 7 | 98173565 | 99465540 |
| cheese-intake | PS | -0.165019 | -0.73201 | 0.33269 | 0.0272313 | 0 | 0.54473 | 0.488478 | 0.806037254 | 7 | 99465541 | 100849307 |
| cheese-intake | PS | -0.123519 | -1 | 0.64406 | 0.0152569 | 0 | 1 | 0.704721 | 0.904676873 | 7 | 100849308 | 101950748 |
| cheese-intake | PS | -0.601993 | -1 | -0.05691 | 0.362396 | 0.00789 | 1 | 0.0327667 | 0.333713979 | 7 | 103191323 | 104109231 |
| cheese-intake | PS | -0.400653 | -1 | 0.22135 | 0.160523 | 0 | 1 | 0.178623 | 0.582803181 | 7 | 107658604 | 109095558 |
| cheese-intake | PS | -0.180906 | -1 | 0.5097 | 0.0327271 | 0 | 1 | 0.551249 | 0.843473948 | 7 | 109095559 | 110479479 |
| cheese-intake | PS | 0.263006 | -0.22728 | 0.9515 | 0.0691721 | 0 | 0.90938 | 0.268926 | 0.653020309 | 7 | 110479480 | 111795299 |
| cheese-intake | PS | -0.127522 | -0.51741 | 0.24784 | 0.016262 | 0 | 0.27052 | 0.47968 | 0.801347163 | 7 | 113339387 | 115321301 |
| cheese-intake | PS | -0.225762 | -0.57897 | 0.10644 | 0.0509686 | 0 | 0.33521 | 0.17724 | 0.582296617 | 7 | 115321302 | 116835336 |
| cheese-intake | PS | -0.371344 | -1 | 0.14319 | 0.137896 | 0 | 1 | 0.145684 | 0.54736283 | 7 | 116835337 | 118342090 |
| cheese-intake | PS | -0.752782 | -1 | -0.1475 | 0.56668 | 0.02615 | 1 | 0.0141466 | 0.269716852 | 7 | 127903739 | 128779173 |
| cheese-intake | PS | -0.563289 | -1 | -0.11463 | 0.317295 | 0.01553 | 1 | 0.0165134 | 0.280108322 | 7 | 128779174 | 130418704 |
| cheese-intake | PS | -0.15991 | -1 | 1 | 0.0255711 | 0 | 1 | 0.712529 | 0.906199266 | 7 | 130418705 | 131856481 |
| cheese-intake | PS | NA | NA | NA | NA | NA | NA | NA | NA | 7 | 133807217 | 134943221 |
| cheese-intake | PS | 0.379239 | -0.02719 | 0.88776 | 0.143822 | 0 | 0.78813 | 0.0672093 | 0.42956081 | 7 | 134943222 | 136113467 |
| cheese-intake | PS | 0.458546 | 0.18967 | 0.76622 | 0.210265 | 0.03598 | 0.58709 | 0.00110852 | 0.120680877 | 7 | 138755108 | 140217630 |
| cheese-intake | PS | 0.89549 | 0.28274 | 1 | 0.801902 | 0.08064 | 1 | 0.00647286 | 0.200879756 | 7 | 140217631 | 142098979 |
| cheese-intake | PS | -0.273449 | -1 | 0.32688 | 0.0747742 | 0 | 1 | 0.333272 | 0.711881198 | 7 | 142098980 | 144324464 |
| cheese-intake | PS | -0.180077 | -0.72601 | 0.27756 | 0.0324277 | 0 | 0.53173 | 0.417895 | 0.767893591 | 7 | 147352172 | 148622913 |
| cheese-intake | PS | 0.362633 | -0.18063 | 1 | 0.131503 | 0 | 1 | 0.169039 | 0.581392693 | 7 | 148622914 | 149842999 |
| cheese-intake | PS | -0.215079 | -0.60696 | 0.14818 | 0.046259 | 0 | 0.36844 | 0.232626 | 0.622842262 | 7 | 152253295 | 153241228 |
| cheese-intake | PS | 0.260261 | -0.12117 | 0.77799 | 0.0677356 | 0 | 0.60887 | 0.172778 | 0.582296617 | 7 | 154407488 | 155280610 |
| cheese-intake | PS | 0.279506 | -0.75596 | 1 | 0.0781234 | 0 | 1 | 0.500469 | 0.814040339 | 8 | 2970492 | 3386667 |
| cheese-intake | PS | -0.532047 | -1 | -0.07031 | 0.283074 | 0.0089 | 1 | 0.0258401 | 0.305371 | 8 | 3386668 | 3787248 |
| cheese-intake | PS | -0.337147 | -0.76058 | 0.02415 | 0.113668 | 0 | 0.57849 | 0.0663215 | 0.426779407 | 8 | 4273084 | 4893120 |
| cheese-intake | PS | -0.161993 | -0.68992 | 0.30003 | 0.0262417 | 0 | 0.48312 | 0.458033 | 0.792338865 | 8 | 9835864 | 10478851 |
| cheese-intake | PS | -0.29621 | -0.76824 | 0.09989 | 0.0877402 | 0 | 0.59019 | 0.136999 | 0.540048903 | 8 | 17947005 | 18668609 |
| cheese-intake | PS | -0.239566 | -0.9733 | 0.24057 | 0.0573917 | 0 | 0.97356 | 0.296763 | 0.682074566 | 8 | 21650454 | 22895018 |
| cheese-intake | PS | -0.249956 | -1 | 0.44724 | 0.0624779 | 0 | 1 | 0.436841 | 0.77623651 | 8 | 22895019 | 23788494 |
| cheese-intake | PS | 0.0642553 | -0.29364 | 0.41984 | 0.00412875 | 0 | 0.19184 | 0.710376 | 0.906057359 | 8 | 24863244 | 25859277 |
| cheese-intake | PS | -0.228887 | -0.70524 | 0.17617 | 0.052389 | 0 | 0.50053 | 0.257658 | 0.643621228 | 8 | 25859278 | 26679135 |
| cheese-intake | PS | 0.0240187 | -0.3683 | 0.42477 | 0.000576897 | 0 | 0.2193 | 0.896299 | 0.971785522 | 8 | 27406512 | 28344176 |
| cheese-intake | PS | -0.592805 | -1 | 0.16632 | 0.351418 | 0 | 1 | 0.117797 | 0.518364615 | 8 | 53108911 | 54119373 |
| cheese-intake | PS | 0.816562 | 0.1244 | 1 | 0.666774 | 0.02386 | 1 | 0.0242516 | 0.303629549 | 8 | 54119374 | 55275354 |
| cheese-intake | PS | -0.661743 | -1 | -0.11242 | 0.437904 | 0.01547 | 1 | 0.0193147 | 0.292045418 | 8 | 56346879 | 57436722 |
| cheese-intake | PS | -0.0546534 | -0.96654 | 0.75077 | 0.00298699 | 0 | 1 | 0.864586 | 0.958635788 | 8 | 57436723 | 58675117 |
| cheese-intake | PS | 0.49803 | -0.27194 | 1 | 0.248034 | 0 | 1 | 0.196999 | 0.601462413 | 8 | 58675118 | 59555977 |
| cheese-intake | PS | 0.111441 | -0.47075 | 0.77931 | 0.0124191 | 0 | 0.69406 | 0.668018 | 0.894208045 | 8 | 59555978 | 60476248 |
| cheese-intake | PS | 0.263194 | -0.30364 | 1 | 0.0692712 | 0 | 1 | 0.326592 | 0.706605148 | 8 | 70004666 | 70872088 |
| cheese-intake | PS | 0.181034 | -0.52333 | 1 | 0.0327732 | 0 | 1 | 0.56289 | 0.8452408 | 8 | 70872089 | 72013184 |
| cheese-intake | PS | 0.0930296 | -0.30014 | 0.50133 | 0.00865451 | 0 | 0.26168 | 0.620362 | 0.867109031 | 8 | 72013185 | 72917489 |
| cheese-intake | PS | -0.732313 | -1 | -0.34693 | 0.536283 | 0.12036 | 1 | 0.000412887 | 0.064213759 | 8 | 73838028 | 75011699 |
| cheese-intake | PS | 0.275556 | -0.45039 | 1 | 0.0759314 | 0 | 1 | 0.403067 | 0.76222165 | 8 | 75011700 | 76295483 |
| cheese-intake | PS | 0.192332 | -0.54178 | 1 | 0.0369915 | 0 | 1 | 0.549953 | 0.843473948 | 8 | 76295484 | 77377989 |
| cheese-intake | PS | 0.148211 | -0.2732 | 0.60244 | 0.0219664 | 0 | 0.36622 | 0.464975 | 0.795405161 | 8 | 77377990 | 78633659 |
| cheese-intake | PS | -0.809633 | -1 | -0.10404 | 0.655506 | 0.01857 | 1 | 0.0322757 | 0.331485648 | 8 | 79756170 | 81340231 |
| cheese-intake | PS | 0.156057 | -0.50497 | 0.92787 | 0.0243537 | 0 | 0.92609 | 0.5868 | 0.855475038 | 8 | 81340232 | 82878769 |
| cheese-intake | PS | 0.0101484 | -0.69497 | 0.70904 | 0.000102991 | 0 | 0.84919 | 0.970974 | 0.993719113 | 8 | 83730338 | 85116734 |
| cheese-intake | PS | -0.243332 | -0.96454 | 0.31789 | 0.0592102 | 0 | 0.93829 | 0.357063 | 0.732977849 | 8 | 85116735 | 86251870 |
| cheese-intake | PS | 0.162324 | -0.506 | 0.9754 | 0.0263492 | 0 | 1 | 0.581326 | 0.85428452 | 8 | 86251871 | 87563145 |
| cheese-intake | PS | 0.0000762 | NA | NA | 5.8E-09 | NA | NA | 0.999839 | 0.999874 | 8 | 92876621 | 94999066 |
| cheese-intake | PS | -0.255319 | -1 | 0.45993 | 0.0651879 | 0 | 1 | 0.420322 | 0.767893591 | 8 | 96175631 | 96900513 |
| cheese-intake | PS | -0.599861 | -1 | -0.26385 | 0.359834 | 0.06962 | 1 | 0.000767588 | 0.108997496 | 8 | 96900514 | 98132519 |
| cheese-intake | PS | -0.13147 | -0.92331 | 0.54311 | 0.0172845 | 0 | 0.96898 | 0.64935 | 0.883509451 | 8 | 101448440 | 102548680 |
| cheese-intake | PS | -0.124649 | -1 | 0.78784 | 0.0155374 | 0 | 1 | 0.729113 | 0.913769401 | 8 | 102548681 | 103716053 |
| cheese-intake | PS | -0.274276 | -1 | 0.43021 | 0.0752273 | 0 | 1 | 0.386802 | 0.751444076 | 8 | 103716054 | 104467845 |
| cheese-intake | PS | 0.00202521 | -1 | 1 | 0.0000041 | 0 | 1 | 0.996413 | 0.999256787 | 8 | 104467846 | 105370130 |
| cheese-intake | PS | -0.123846 | -0.56184 | 0.2727 | 0.0153379 | 0 | 0.31884 | 0.521201 | 0.823281169 | 8 | 105370131 | 106500950 |
| cheese-intake | PS | -0.317231 | -0.8851 | 0.12966 | 0.100636 | 0 | 0.78404 | 0.162068 | 0.574093371 | 8 | 106500951 | 107787163 |
| cheese-intake | PS | -0.334842 | -1 | 0.24353 | 0.112119 | 0 | 1 | 0.240303 | 0.631399516 | 8 | 112601514 | 113650853 |
| cheese-intake | PS | 0.0552206 | -0.91442 | 1 | 0.00304932 | 0 | 1 | 0.878832 | 0.964594882 | 8 | 113650854 | 114781574 |
| cheese-intake | PS | -0.0432861 | -0.5354 | 0.4287 | 0.00187368 | 0 | 0.34179 | 0.841642 | 0.949828187 | 8 | 118300069 | 119423298 |
| cheese-intake | PS | 0.930396 | 0.16042 | 1 | 0.865637 | 0.03387 | 1 | 0.024104 | 0.303629549 | 8 | 119423299 | 120216587 |
| cheese-intake | PS | -0.584232 | -1 | -0.08922 | 0.341327 | 0.01121 | 1 | 0.0256092 | 0.305371 | 8 | 121554391 | 122622804 |
| cheese-intake | PS | -0.0108134 | -0.87345 | 0.80633 | 0.00011693 | 0 | 1 | 0.973386 | 0.994083388 | 8 | 125453323 | 126766827 |
| cheese-intake | PS | 0.0671817 | -0.84865 | 1 | 0.00451338 | 0 | 1 | 0.848307 | 0.953724841 | 8 | 126766828 | 128073654 |
| cheese-intake | PS | 0.221838 | -0.05449 | 0.52928 | 0.0492122 | 0 | 0.28014 | 0.122787 | 0.525428437 | 8 | 128073655 | 129291118 |
| cheese-intake | PS | -0.0555798 | -0.76008 | 0.61692 | 0.00308912 | 0 | 0.78509 | 0.836847 | 0.948975213 | 8 | 129291119 | 130383563 |
| cheese-intake | PS | -0.390577 | -1 | 0.19507 | 0.152551 | 0 | 1 | 0.181693 | 0.586284077 | 8 | 132534637 | 133461551 |
| cheese-intake | PS | 0.347672 | -0.13211 | 0.97901 | 0.120876 | 0 | 0.95847 | 0.1433 | 0.545236775 | 8 | 133461552 | 134509448 |
| cheese-intake | PS | 0.0852368 | -0.33954 | 0.54039 | 0.00726531 | 0 | 0.31282 | 0.674291 | 0.89679545 | 8 | 135313674 | 136220342 |
| cheese-intake | PS | -0.118529 | -0.59708 | 0.33098 | 0.0140492 | 0 | 0.37009 | 0.579123 | 0.853279664 | 8 | 138564844 | 139404631 |
| cheese-intake | PS | 0.233308 | -0.24496 | 0.82399 | 0.0544328 | 0 | 0.68904 | 0.305729 | 0.688484504 | 8 | 140355989 | 141527881 |
| cheese-intake | PS | -0.18561 | -0.72757 | 0.26572 | 0.0344512 | 0 | 0.53066 | 0.402852 | 0.76222165 | 8 | 142611890 | 143611461 |
| cheese-intake | PS | 0.670473 | -0.0514 | 1 | 0.449534 | 0 | 1 | 0.0721575 | 0.442981945 | 8 | 144934289 | 146303787 |
| cheese-intake | PS | 0.528233 | 0.09113 | 1 | 0.27903 | 0.01056 | 1 | 0.0210919 | 0.292402657 | 9 | 653662 | 1103598 |
| cheese-intake | PS | 0.42784 | -0.10221 | 1 | 0.183047 | 0 | 1 | 0.105684 | 0.5002376 | 9 | 1874962 | 2441120 |
| cheese-intake | PS | -0.0917115 | -1 | 0.6982 | 0.008411 | 0 | 1 | 0.779363 | 0.930897141 | 9 | 3079046 | 4025355 |
| cheese-intake | PS | -0.153266 | -1 | 0.62155 | 0.0234906 | 0 | 1 | 0.636101 | 0.873870499 | 9 | 4025356 | 4596614 |
| cheese-intake | PS | -0.249172 | -1 | 0.37274 | 0.0620868 | 0 | 1 | 0.392812 | 0.754486297 | 9 | 4596615 | 5437591 |
| cheese-intake | PS | 0.712059 | 0.0646 | 1 | 0.507028 | 0.01148 | 1 | 0.0384323 | 0.351728073 | 9 | 9920259 | 10675474 |
| cheese-intake | PS | -0.130563 | -0.64094 | 0.35142 | 0.0170466 | 0 | 0.42177 | 0.564749 | 0.846061641 | 9 | 12664859 | 13512852 |
| cheese-intake | PS | 0.602957 | -0.00663 | 1 | 0.363558 | 0 | 1 | 0.0577855 | 0.402808045 | 9 | 13512853 | 14244747 |
| cheese-intake | PS | 0.42749 | -0.03728 | 1 | 0.182748 | 0 | 1 | 0.0737935 | 0.448807395 | 9 | 16658378 | 17392382 |
| cheese-intake | PS | 0.43853 | -0.00704 | 1 | 0.192309 | 0 | 1 | 0.0542181 | 0.388774326 | 9 | 19463293 | 20483880 |
| cheese-intake | PS | 0.627743 | 0.01602 | 1 | 0.394061 | 0.0053 | 1 | 0.045584 | 0.364895451 | 9 | 20483881 | 21674032 |
| cheese-intake | PS | -0.0669915 | -0.49181 | 0.33847 | 0.00448786 | 0 | 0.26203 | 0.731332 | 0.915496478 | 9 | 21674033 | 23091193 |
| cheese-intake | PS | 0.292739 | -0.19842 | 0.99632 | 0.0856961 | 0 | 0.99508 | 0.227475 | 0.620938095 | 9 | 23091194 | 23859374 |
| cheese-intake | PS | 0.408785 | -0.26813 | 1 | 0.167105 | 0 | 1 | 0.217631 | 0.615142653 | 9 | 28067455 | 28766060 |
| cheese-intake | PS | 0.232069 | -0.35178 | 0.95022 | 0.0538561 | 0 | 0.91785 | 0.397682 | 0.756452773 | 9 | 31115154 | 32253283 |
| cheese-intake | PS | -0.160667 | -0.73956 | 0.34955 | 0.025814 | 0 | 0.57308 | 0.494052 | 0.8109478 | 9 | 32253284 | 33194892 |
| cheese-intake | PS | 0.223342 | -0.52472 | 1 | 0.0498815 | 0 | 1 | 0.482061 | 0.802193156 | 9 | 34704545 | 36749273 |
| cheese-intake | PS | -0.226347 | -1 | 0.49518 | 0.0512328 | 0 | 1 | 0.480483 | 0.801459386 | 9 | 72288879 | 73915494 |
| cheese-intake | PS | -0.137555 | -0.52949 | 0.23611 | 0.0189214 | 0 | 0.28239 | 0.447366 | 0.785321521 | 9 | 73915495 | 74950318 |
| cheese-intake | PS | 0.21222 | -0.26811 | 0.77752 | 0.0450372 | 0 | 0.61005 | 0.358651 | 0.733471613 | 9 | 76197745 | 77862308 |
| cheese-intake | PS | -0.573907 | -1 | -0.20376 | 0.32937 | 0.0416 | 1 | 0.00412963 | 0.178799682 | 9 | 79451036 | 80137024 |
| cheese-intake | PS | 0.338028 | -0.16856 | 1 | 0.114263 | 0 | 1 | 0.173057 | 0.582296617 | 9 | 81161598 | 82601465 |
| cheese-intake | PS | 0.0811396 | -0.70818 | 0.97061 | 0.00658363 | 0 | 1 | 0.798065 | 0.940238575 | 9 | 85135752 | 86769886 |
| cheese-intake | PS | -0.136533 | -1 | 0.65728 | 0.0186414 | 0 | 1 | 0.679138 | 0.897275367 | 9 | 91643256 | 92500277 |
| cheese-intake | PS | 0.93424 | 0.36804 | 1 | 0.872805 | 0.13545 | 1 | 0.00203407 | 0.145139734 | 9 | 92500278 | 93441050 |
| cheese-intake | PS | -0.152942 | -1 | 0.5531 | 0.0233912 | 0 | 1 | 0.622869 | 0.868612363 | 9 | 93441051 | 94175374 |
| cheese-intake | PS | 0.115678 | -0.46737 | 0.78586 | 0.0133813 | 0 | 0.68573 | 0.650485 | 0.88409655 | 9 | 96670172 | 97418633 |
| cheese-intake | PS | -0.605627 | -1 | 0.10191 | 0.366784 | 0 | 1 | 0.0958147 | 0.482879102 | 9 | 97418634 | 98885862 |
| cheese-intake | PS | -0.288334 | -1 | 0.27045 | 0.0831368 | 0 | 1 | 0.291764 | 0.67501725 | 9 | 100310518 | 101596750 |
| cheese-intake | PS | -0.00380714 | -0.60807 | 0.61567 | 0.0000145 | 0 | 0.5793 | 0.988529 | 0.998310357 | 9 | 104222849 | 105043411 |
| cheese-intake | PS | 0.122347 | -0.32989 | 0.65569 | 0.0149689 | 0 | 0.44284 | 0.570664 | 0.849106435 | 9 | 107061020 | 108203095 |
| cheese-intake | PS | -0.0664817 | -0.37465 | 0.23883 | 0.00441982 | 0 | 0.14698 | 0.656967 | 0.888469657 | 9 | 109150718 | 110630150 |
| cheese-intake | PS | -0.216919 | -0.53764 | 0.09718 | 0.0470541 | 0 | 0.28905 | 0.17199 | 0.582296617 | 9 | 111368108 | 112076381 |
| cheese-intake | PS | -0.428897 | -0.99366 | -0.0466 | 0.183953 | 0.00364 | 0.98735 | 0.0308704 | 0.320072147 | 9 | 112076382 | 112865520 |
| cheese-intake | PS | -0.612888 | -1 | -0.14391 | 0.375632 | 0.02215 | 1 | 0.0115392 | 0.251698291 | 9 | 113646150 | 114443475 |
| cheese-intake | PS | -0.396441 | -1 | 0.2867 | 0.157166 | 0 | 1 | 0.228701 | 0.620938095 | 9 | 114443476 | 115390112 |
| cheese-intake | PS | 0.137789 | -0.98545 | 1 | 0.0189858 | 0 | 1 | 0.737098 | 0.917849189 | 9 | 116159541 | 117054909 |
| cheese-intake | PS | 0.352209 | -0.10906 | 0.95765 | 0.124051 | 0 | 0.91843 | 0.134801 | 0.539534395 | 9 | 117054910 | 117989017 |
| cheese-intake | PS | -0.21699 | -0.80418 | 0.24781 | 0.0470845 | 0 | 0.65166 | 0.341214 | 0.716609936 | 9 | 117989018 | 119001227 |
| cheese-intake | PS | -0.302381 | -1 | 0.31163 | 0.0914345 | 0 | 1 | 0.303874 | 0.687150579 | 9 | 119890465 | 121008529 |
| cheese-intake | PS | -0.379759 | -0.97215 | 0.06458 | 0.144217 | 0 | 0.94508 | 0.099365 | 0.48639381 | 9 | 125137579 | 126092931 |
| cheese-intake | PS | -0.0897508 | -0.52085 | 0.33434 | 0.00805521 | 0 | 0.28686 | 0.656183 | 0.888144914 | 9 | 126092932 | 127184582 |
| cheese-intake | PS | 0.0815687 | -0.34949 | 0.5463 | 0.00665345 | 0 | 0.32012 | 0.696113 | 0.903618862 | 9 | 128785783 | 129617771 |
| cheese-intake | PS | -0.292384 | -1 | 0.24355 | 0.0854885 | 0 | 1 | 0.266897 | 0.651484007 | 9 | 129617772 | 130902727 |
| cheese-intake | PS | 0.0326124 | -0.39594 | 0.46966 | 0.00106357 | 0 | 0.26538 | 0.872734 | 0.961980845 | 9 | 130902728 | 132193798 |
| cheese-intake | PS | 0.179154 | -0.34309 | 0.82059 | 0.0320961 | 0 | 0.69268 | 0.471018 | 0.797472807 | 9 | 136042491 | 136770926 |
| cheese-intake | PS | 0.472178 | -0.01519 | 1 | 0.222952 | 0 | 1 | 0.0506338 | 0.375723306 | 9 | 136770927 | 137593527 |
| cheese-intake | PS | 0.292085 | -0.08594 | 0.77438 | 0.0853138 | 0 | 0.59967 | 0.132456 | 0.538133195 | 9 | 138202113 | 138995791 |
| cheese-intake | PS | 0.162899 | -0.48077 | 0.99322 | 0.026536 | 0 | 1 | 0.564346 | 0.846030396 | 9 | 138995792 | 140097759 |
| cheese-intake | PS | -0.224164 | -0.66181 | 0.16297 | 0.0502496 | 0 | 0.43878 | 0.243785 | 0.635037917 | 9 | 140097760 | 141146682 |
| cheese-intake | PS | -0.378483 | -1 | 0.25595 | 0.143249 | 0 | 1 | 0.220757 | 0.619941842 | 10 | 1872961 | 2637065 |
| cheese-intake | PS | -0.280067 | -1 | 0.32887 | 0.0784376 | 0 | 1 | 0.326324 | 0.706605148 | 10 | 2637066 | 3225336 |
| cheese-intake | PS | 0.520425 | -0.15762 | 1 | 0.270842 | 0 | 1 | 0.128056 | 0.532778211 | 10 | 3225337 | 3880322 |
| cheese-intake | PS | -0.6602 | -1 | -0.02806 | 0.435864 | 0.00772 | 1 | 0.0453321 | 0.364895451 | 10 | 3880323 | 4813182 |
| cheese-intake | PS | -0.510413 | -1 | -0.15602 | 0.260522 | 0.02486 | 1 | 0.00708805 | 0.205706476 | 10 | 5396243 | 6234718 |
| cheese-intake | PS | -0.381347 | -0.78583 | -0.04815 | 0.145425 | 0.00392 | 0.61753 | 0.0298099 | 0.318452682 | 10 | 6234719 | 6897037 |
| cheese-intake | PS | -0.021265 | -0.44046 | 0.39593 | 0.000452202 | 0 | 0.2387 | 0.914116 | 0.977166335 | 10 | 6897038 | 7659872 |
| cheese-intake | PS | 0.125486 | -0.27402 | 0.54693 | 0.0157468 | 0 | 0.30663 | 0.516259 | 0.822603387 | 10 | 7659873 | 8771920 |
| cheese-intake | PS | -0.47952 | -1 | 0.12072 | 0.229939 | 0 | 1 | 0.107696 | 0.506822963 | 10 | 8771921 | 10081279 |
| cheese-intake | PS | -0.0900009 | -0.75683 | 0.51076 | 0.00810016 | 0 | 0.69454 | 0.727907 | 0.913309359 | 10 | 10081280 | 10969481 |
| cheese-intake | PS | 0.394345 | -0.2498 | 1 | 0.155508 | 0 | 1 | 0.200587 | 0.602877424 | 10 | 12581572 | 13208061 |
| cheese-intake | PS | -0.0154701 | -0.68379 | 0.64919 | 0.000239325 | 0 | 0.71189 | 0.953049 | 0.988457854 | 10 | 13208062 | 14008135 |
| cheese-intake | PS | 0.324516 | -0.03413 | 0.72948 | 0.105311 | 0 | 0.53214 | 0.0750611 | 0.451472473 | 10 | 15946678 | 17065860 |
| cheese-intake | PS | 0.625002 | 0.15201 | 1 | 0.390628 | 0.02443 | 1 | 0.0140088 | 0.269133769 | 10 | 17065861 | 18529742 |
| cheese-intake | PS | -0.158209 | -1 | 0.59148 | 0.02503 | 0 | 1 | 0.630299 | 0.870425596 | 10 | 20616433 | 21477692 |
| cheese-intake | PS | 0.481992 | -0.08104 | 1 | 0.232316 | 0 | 1 | 0.0960263 | 0.482879102 | 10 | 33655459 | 35178224 |
| cheese-intake | PS | 0.0757822 | -0.38835 | 0.55528 | 0.00574294 | 0 | 0.33473 | 0.72551 | 0.912492492 | 10 | 53129610 | 53919161 |
| cheese-intake | PS | 0.36845 | -0.11603 | 1 | 0.135755 | 0 | 1 | 0.129897 | 0.534632683 | 10 | 55867695 | 57044845 |
| cheese-intake | PS | 0.84207 | 0.48437 | 1 | 0.709083 | 0.23462 | 1 | 0.0000156 | 0.019437599 | 10 | 59822947 | 61470383 |
| cheese-intake | PS | 0.160402 | -0.42732 | 0.84308 | 0.0257289 | 0 | 0.73784 | 0.546633 | 0.841727194 | 10 | 61470384 | 62626465 |
| cheese-intake | PS | 0.0931899 | -0.41935 | 0.67459 | 0.00868436 | 0 | 0.51587 | 0.681903 | 0.89947302 | 10 | 62626466 | 64069687 |
| cheese-intake | PS | -0.361028 | -0.93541 | 0.0818 | 0.130341 | 0 | 0.87499 | 0.105632 | 0.5002376 | 10 | 64069688 | 65400431 |
| cheese-intake | PS | -0.256028 | -1 | 0.43914 | 0.0655504 | 0 | 1 | 0.418529 | 0.767893591 | 10 | 65400432 | 66510387 |
| cheese-intake | PS | -0.230502 | -1 | 0.80899 | 0.0531311 | 0 | 1 | 0.57227 | 0.849947167 | 10 | 67146044 | 67769822 |
| cheese-intake | PS | -0.474365 | -1 | 0.16828 | 0.225022 | 0 | 1 | 0.138386 | 0.540048903 | 10 | 69904171 | 71050504 |
| cheese-intake | PS | 0.324222 | -0.12008 | 0.87994 | 0.10512 | 0 | 0.77429 | 0.149597 | 0.55216732 | 10 | 71672998 | 72659223 |
| cheese-intake | PS | -0.0335047 | -0.30982 | 0.23586 | 0.00112257 | 0 | 0.1054 | 0.805285 | 0.941740696 | 10 | 72659224 | 73514214 |
| cheese-intake | PS | -0.324944 | -0.89618 | 0.10461 | 0.105589 | 0 | 0.8032 | 0.137483 | 0.540048903 | 10 | 73514215 | 75694023 |
| cheese-intake | PS | -0.0712508 | -0.67214 | 0.48024 | 0.00507668 | 0 | 0.52073 | 0.775855 | 0.929934281 | 10 | 78665482 | 79952996 |
| cheese-intake | PS | -0.345069 | -0.62788 | -0.09392 | 0.119073 | 0.00889 | 0.39423 | 0.0104489 | 0.24375791 | 10 | 79952997 | 81190573 |
| cheese-intake | PS | 0.494164 | 0.01431 | 1 | 0.244198 | 0.00365 | 1 | 0.0439505 | 0.360793635 | 10 | 83596351 | 84679429 |
| cheese-intake | PS | -0.126162 | -1 | 0.99085 | 0.0159168 | 0 | 1 | 0.760528 | 0.926476855 | 10 | 84679430 | 85463484 |
| cheese-intake | PS | -0.684891 | -1 | -0.1505 | 0.469076 | 0.02485 | 1 | 0.015969 | 0.274498705 | 10 | 88443653 | 89971628 |
| cheese-intake | PS | 0.0396832 | -0.56049 | 0.69816 | 0.00157476 | 0 | 0.60969 | 0.880725 | 0.965761891 | 10 | 89971629 | 91021321 |
| cheese-intake | PS | -0.208418 | -0.81478 | 0.28736 | 0.0434381 | 0 | 0.67441 | 0.385617 | 0.751421205 | 10 | 98005995 | 99367800 |
| cheese-intake | PS | -0.0917198 | -0.77542 | 0.46691 | 0.00841253 | 0 | 0.69982 | 0.702621 | 0.903972224 | 10 | 99367801 | 100337830 |
| cheese-intake | PS | 0.175556 | -0.35366 | 0.79781 | 0.0308198 | 0 | 0.65009 | 0.478804 | 0.800410688 | 10 | 101271452 | 102509298 |
| cheese-intake | PS | 0.391015 | -0.01992 | 1 | 0.152893 | 0 | 1 | 0.05846 | 0.402808045 | 10 | 102509299 | 104206837 |
| cheese-intake | PS | -0.0132765 | -0.33283 | 0.29988 | 0.000176266 | 0 | 0.13604 | 0.931957 | 0.981625675 | 10 | 104206838 | 106142283 |
| cheese-intake | PS | -0.174296 | -0.50371 | 0.13747 | 0.0303791 | 0 | 0.25381 | 0.266006 | 0.651484007 | 10 | 114255955 | 115588903 |
| cheese-intake | PS | -0.565363 | -1 | -0.14837 | 0.319636 | 0.02252 | 1 | 0.0103363 | 0.242865869 | 10 | 118416050 | 119528730 |
| cheese-intake | PS | -0.467758 | -0.93455 | -0.10456 | 0.218798 | 0.01154 | 0.87339 | 0.0139466 | 0.269133769 | 10 | 120592840 | 121874445 |
| cheese-intake | PS | -0.344044 | -1 | 0.24409 | 0.118366 | 0 | 1 | 0.224103 | 0.620938095 | 10 | 121874446 | 122803506 |
| cheese-intake | PS | -0.463917 | -1 | 0.18935 | 0.215219 | 0 | 1 | 0.143976 | 0.545236775 | 10 | 122803507 | 123856184 |
| cheese-intake | PS | -0.254931 | -1 | 0.32548 | 0.0649898 | 0 | 1 | 0.356322 | 0.732838572 | 10 | 124894143 | 125798319 |
| cheese-intake | PS | -0.212978 | -0.7425 | 0.24511 | 0.0453595 | 0 | 0.55327 | 0.3369 | 0.713887872 | 10 | 126875817 | 127997708 |
| cheese-intake | PS | 0.518561 | -0.28708 | 1 | 0.268906 | 0 | 1 | 0.176206 | 0.582296617 | 10 | 127997709 | 129134738 |
| cheese-intake | PS | -0.528923 | -1 | -0.05843 | 0.27976 | 0.00661 | 1 | 0.028409 | 0.314521336 | 10 | 130694009 | 131694738 |
| cheese-intake | PS | 0.0881312 | -0.47973 | 0.73578 | 0.00776711 | 0 | 0.65011 | 0.732217 | 0.91590223 | 10 | 133111171 | 133818036 |
| cheese-intake | PS | 0.366925 | -0.23748 | 1 | 0.134634 | 0 | 1 | 0.203654 | 0.60356984 | 11 | 1857846 | 2477449 |
| cheese-intake | PS | 0.138938 | -0.4421 | 0.88367 | 0.0193038 | 0 | 0.85982 | 0.593511 | 0.856056811 | 11 | 2477450 | 3362508 |
| cheese-intake | PS | -0.0309983 | -1 | 0.83895 | 0.000960898 | 0 | 1 | 0.927057 | 0.980084322 | 11 | 4405708 | 4946051 |
| cheese-intake | PS | 0.108127 | -0.50969 | 0.86461 | 0.0116915 | 0 | 0.81317 | 0.698815 | 0.903972224 | 11 | 4946052 | 5533057 |
| cheese-intake | PS | -0.0724361 | -0.58555 | 0.42056 | 0.00524699 | 0 | 0.39693 | 0.737674 | 0.917849189 | 11 | 6180841 | 7191230 |
| cheese-intake | PS | -0.219955 | -0.9024 | 0.33808 | 0.0483804 | 0 | 0.83984 | 0.402186 | 0.76222165 | 11 | 7191231 | 7915071 |
| cheese-intake | PS | -0.156865 | -0.68477 | 0.31326 | 0.0246068 | 0 | 0.47407 | 0.495286 | 0.811042493 | 11 | 10370101 | 11081299 |
| cheese-intake | PS | 0.476291 | -0.04827 | 1 | 0.226853 | 0 | 1 | 0.074617 | 0.450639179 | 11 | 11632651 | 12470449 |
| cheese-intake | PS | -0.226338 | -1 | 0.54729 | 0.0512287 | 0 | 1 | 0.497607 | 0.812186138 | 11 | 16383387 | 17583948 |
| cheese-intake | PS | -0.387278 | -1 | 0.28491 | 0.149984 | 0 | 1 | 0.229259 | 0.620938095 | 11 | 17583949 | 18740267 |
| cheese-intake | PS | -0.406212 | -1 | 0.19391 | 0.165008 | 0 | 1 | 0.166884 | 0.579193756 | 11 | 18740268 | 19780784 |
| cheese-intake | PS | 0.0710581 | -0.42216 | 0.59315 | 0.00504925 | 0 | 0.41145 | 0.751026 | 0.922735859 | 11 | 21442723 | 22368743 |
| cheese-intake | PS | -0.978769 | -1 | -0.37798 | 0.957989 | 0.14297 | 1 | 0.00298156 | 0.167709644 | 11 | 25662919 | 26356980 |
| cheese-intake | PS | -0.441162 | -1 | 0.48077 | 0.194624 | 0 | 1 | 0.279565 | 0.665980518 | 11 | 26356981 | 27018307 |
| cheese-intake | PS | -0.317807 | -1 | 0.2622 | 0.101001 | 0 | 1 | 0.25318 | 0.640696318 | 11 | 27018308 | 28577718 |
| cheese-intake | PS | -0.550606 | -1 | -0.02721 | 0.303167 | 0.00704 | 1 | 0.0440263 | 0.360793635 | 11 | 32065772 | 32830422 |
| cheese-intake | PS | -0.0643099 | -0.52557 | 0.3642 | 0.00413577 | 0 | 0.30275 | 0.753627 | 0.923275238 | 11 | 32830423 | 33905327 |
| cheese-intake | PS | 0.76476 | 0.30859 | 1 | 0.584858 | 0.09523 | 1 | 0.00195285 | 0.145139734 | 11 | 33905328 | 34672697 |
| cheese-intake | PS | 0.501196 | 0.07425 | 1 | 0.251198 | 0.00738 | 1 | 0.0256016 | 0.305371 | 11 | 35500368 | 36331189 |
| cheese-intake | PS | 0.130802 | -0.17276 | 0.44957 | 0.0171091 | 0 | 0.2038 | 0.386109 | 0.751421205 | 11 | 36331190 | 37119024 |
| cheese-intake | PS | -0.298247 | -1 | 0.27414 | 0.0889512 | 0 | 1 | 0.277664 | 0.663439997 | 11 | 39329141 | 40362940 |
| cheese-intake | PS | 0.966498 | 0.12217 | 1 | 0.934119 | 0.02702 | 1 | 0.0290343 | 0.316086746 | 11 | 40362941 | 41603195 |
| cheese-intake | PS | 0.360712 | -0.05288 | 0.86069 | 0.130113 | 0 | 0.74078 | 0.0856644 | 0.468643099 | 11 | 42858198 | 43949377 |
| cheese-intake | PS | -0.806201 | -1 | -0.24903 | 0.649961 | 0.06322 | 1 | 0.00766921 | 0.208730332 | 11 | 46316006 | 48066366 |
| cheese-intake | PS | -0.522155 | -1 | 0.29647 | 0.272646 | 0 | 1 | 0.176602 | 0.582296617 | 11 | 48765367 | 49386071 |
| cheese-intake | PS | -0.000868244 | -0.75204 | 0.73595 | 0.000000754 | 0 | 0.8022 | 0.997727 | 0.999256787 | 11 | 51581596 | 55477633 |
| cheese-intake | PS | 0.159267 | -0.47599 | 0.87372 | 0.025366 | 0 | 0.79981 | 0.587739 | 0.855475038 | 11 | 55477634 | 55947452 |
| cheese-intake | PS | 0.100706 | -0.32626 | 0.5633 | 0.0101417 | 0 | 0.33734 | 0.617157 | 0.865079297 | 11 | 55947453 | 56623494 |
| cheese-intake | PS | -0.439118 | -1 | 0.13064 | 0.192825 | 0 | 1 | 0.130449 | 0.535218311 | 11 | 59256233 | 60515105 |
| cheese-intake | PS | 0.00474397 | -0.37641 | 0.38631 | 0.0000225 | 0 | 0.20197 | 0.979339 | 0.996292185 | 11 | 60515106 | 61717117 |
| cheese-intake | PS | -0.429991 | -0.86215 | -0.07697 | 0.184892 | 0.00707 | 0.7433 | 0.02041 | 0.292402657 | 11 | 62800369 | 64594822 |
| cheese-intake | PS | -0.221358 | -0.49616 | 0.03456 | 0.0489996 | 0 | 0.24617 | 0.0978035 | 0.484668957 | 11 | 64594823 | 66782661 |
| cheese-intake | PS | -0.337122 | -0.60853 | -0.08408 | 0.113652 | 0.00727 | 0.37031 | 0.0110814 | 0.251332308 | 11 | 66782662 | 68000949 |
| cheese-intake | PS | -0.399628 | -1 | 0.07179 | 0.159702 | 0 | 1 | 0.102515 | 0.496571285 | 11 | 68000950 | 68887344 |
| cheese-intake | PS | 0.124686 | -0.38934 | 0.70808 | 0.0155466 | 0 | 0.52243 | 0.606322 | 0.860603065 | 11 | 68887345 | 69713996 |
| cheese-intake | PS | -0.025323 | -0.41518 | 0.34797 | 0.000641252 | 0 | 0.19823 | 0.889414 | 0.969891861 | 11 | 75445254 | 76518906 |
| cheese-intake | PS | 0.116494 | -0.30885 | 0.55765 | 0.0135708 | 0 | 0.32299 | 0.566373 | 0.846966217 | 11 | 78912253 | 79802286 |
| cheese-intake | PS | -0.2906 | -0.74927 | 0.10258 | 0.0844481 | 0 | 0.56141 | 0.139056 | 0.541307385 | 11 | 79802287 | 80726012 |
| cheese-intake | PS | 0.451686 | -0.07374 | 1 | 0.204021 | 0 | 1 | 0.0906333 | 0.478016906 | 11 | 80726013 | 81658298 |
| cheese-intake | PS | 0.384266 | -0.2229 | 1 | 0.14766 | 0 | 1 | 0.199737 | 0.602877424 | 11 | 86629334 | 87676870 |
| cheese-intake | PS | -0.149573 | -1 | 0.85511 | 0.0223721 | 0 | 1 | 0.705792 | 0.904676873 | 11 | 90967062 | 92209168 |
| cheese-intake | PS | -0.754758 | -1 | -0.33744 | 0.569659 | 0.11387 | 1 | 0.000651692 | 0.09674664 | 11 | 94384536 | 95327210 |
| cheese-intake | PS | 0.120926 | -0.20022 | 0.44923 | 0.0146231 | 0 | 0.20246 | 0.451855 | 0.787071163 | 11 | 95327211 | 96150134 |
| cheese-intake | PS | 0.401903 | -0.24291 | 1 | 0.161526 | 0 | 1 | 0.195741 | 0.600448596 | 11 | 99619348 | 100423901 |
| cheese-intake | PS | -0.262994 | -1 | 0.5598 | 0.0691659 | 0 | 1 | 0.468159 | 0.797014625 | 11 | 100423902 | 101152831 |
| cheese-intake | PS | 0.12539 | -0.19607 | 0.45738 | 0.0157228 | 0 | 0.2118 | 0.426475 | 0.772599009 | 11 | 109891838 | 111117780 |
| cheese-intake | PS | -0.046329 | -0.40418 | 0.29626 | 0.00214637 | 0 | 0.17296 | 0.781779 | 0.932381018 | 11 | 111117781 | 112755446 |
| cheese-intake | PS | 0.0757096 | -0.33319 | 0.51577 | 0.00573195 | 0 | 0.28041 | 0.702351 | 0.903972224 | 11 | 112755447 | 113889019 |
| cheese-intake | PS | -0.01167 | -0.50605 | 0.48548 | 0.000136188 | 0 | 0.35061 | 0.957581 | 0.990329179 | 11 | 113889020 | 114742317 |
| cheese-intake | PS | 0.533378 | -0.04195 | 1 | 0.284492 | 0 | 1 | 0.0701125 | 0.439581033 | 11 | 114742318 | 116247377 |
| cheese-intake | PS | -0.0910022 | -0.71759 | 0.44815 | 0.0082814 | 0 | 0.61096 | 0.705386 | 0.904676873 | 11 | 118901214 | 120064528 |
| cheese-intake | PS | 0.183054 | -0.18005 | 0.57639 | 0.0335088 | 0 | 0.33251 | 0.305876 | 0.688484504 | 11 | 120064529 | 121208186 |
| cheese-intake | PS | -0.866442 | -1 | -0.48897 | 0.750722 | 0.23909 | 1 | 0.0000125 | 0.019437599 | 11 | 121208187 | 122589224 |
| cheese-intake | PS | -0.248905 | -0.71654 | 0.1703 | 0.0619536 | 0 | 0.51778 | 0.226324 | 0.620938095 | 11 | 122589225 | 123398882 |
| cheese-intake | PS | 0.737388 | 0.03559 | 1 | 0.543742 | 0.01044 | 1 | 0.0458058 | 0.365774432 | 11 | 123398883 | 124403477 |
| cheese-intake | PS | 0.107975 | -0.37253 | 0.6097 | 0.0116586 | 0 | 0.39669 | 0.626822 | 0.868930667 | 11 | 124403478 | 125266684 |
| cheese-intake | PS | -0.0753253 | -0.47209 | 0.30209 | 0.0056739 | 0 | 0.23556 | 0.676096 | 0.89679545 | 11 | 126304241 | 127306871 |
| cheese-intake | PS | 0.0419292 | -0.33031 | 0.41768 | 0.00175806 | 0 | 0.20246 | 0.81163 | 0.944347553 | 11 | 127306872 | 128262550 |
| cheese-intake | PS | -0.143455 | -0.75548 | 0.3599 | 0.0205794 | 0 | 0.61422 | 0.533891 | 0.832706784 | 11 | 128262551 | 129451784 |
| cheese-intake | PS | 0.129202 | -0.2914 | 0.57367 | 0.0166931 | 0 | 0.34012 | 0.519228 | 0.822603387 | 11 | 129451785 | 130500783 |
| cheese-intake | PS | 0.267161 | -0.16035 | 0.82721 | 0.071375 | 0 | 0.68457 | 0.203131 | 0.60356984 | 11 | 130500784 | 131424361 |
| cheese-intake | PS | 0.313254 | 0.00453 | 0.65385 | 0.0981282 | 0.00129 | 0.42752 | 0.0474457 | 0.369827342 | 11 | 133521643 | 134351064 |
| cheese-intake | PS | 0.647512 | 0.01081 | 1 | 0.419271 | 0.00589 | 1 | 0.0518749 | 0.37957642 | 11 | 134351065 | 134946450 |
| cheese-intake | PS | 0.360212 | -0.04167 | 0.85141 | 0.129752 | 0 | 0.7249 | 0.0754753 | 0.451883999 | 12 | 3069507 | 3871114 |
| cheese-intake | PS | 0.111562 | -0.22807 | 0.457 | 0.0124461 | 0 | 0.2101 | 0.503994 | 0.817301094 | 12 | 4967644 | 6023700 |
| cheese-intake | PS | 0.177215 | -0.41505 | 0.8725 | 0.031405 | 0 | 0.77897 | 0.50864 | 0.822603387 | 12 | 8123318 | 8760628 |
| cheese-intake | PS | -0.0151257 | -0.61275 | 0.58405 | 0.000228786 | 0 | 0.50395 | 0.953063 | 0.988457854 | 12 | 10176714 | 10946140 |
| cheese-intake | PS | -0.328492 | -1 | 0.3755 | 0.107907 | 0 | 1 | 0.317027 | 0.69694374 | 12 | 11742150 | 12721874 |
| cheese-intake | PS | -0.2212 | -0.73754 | 0.2237 | 0.0489295 | 0 | 0.5446 | 0.311314 | 0.694502407 | 12 | 12721875 | 13559527 |
| cheese-intake | PS | 0.00640514 | -0.39622 | 0.40663 | 0.000041 | 0 | 0.22493 | 0.973031 | 0.994031669 | 12 | 13559528 | 14656849 |
| cheese-intake | PS | -0.0286006 | -0.70558 | 0.62759 | 0.000817996 | 0 | 0.71116 | 0.916895 | 0.977166335 | 12 | 14656850 | 16136742 |
| cheese-intake | PS | -0.577459 | -1 | -0.10923 | 0.333459 | 0.01521 | 1 | 0.01796 | 0.283368889 | 12 | 16136743 | 17374895 |
| cheese-intake | PS | -0.634881 | -1 | -0.13132 | 0.403073 | 0.02004 | 1 | 0.0156934 | 0.273599214 | 12 | 20074931 | 20866285 |
| cheese-intake | PS | -0.172675 | -0.66101 | 0.25467 | 0.0298168 | 0 | 0.4423 | 0.420002 | 0.767893591 | 12 | 22928056 | 23923798 |
| cheese-intake | PS | -0.28734 | -0.96062 | 0.21756 | 0.0825643 | 0 | 0.92377 | 0.233557 | 0.622973542 | 12 | 23923799 | 25058714 |
| cheese-intake | PS | 0.10893 | -0.23816 | 0.48663 | 0.0118658 | 0 | 0.2404 | 0.517979 | 0.822603387 | 12 | 25058715 | 25990813 |
| cheese-intake | PS | -0.233242 | -0.65386 | 0.13472 | 0.0544018 | 0 | 0.42753 | 0.210894 | 0.609000711 | 12 | 25990814 | 26958056 |
| cheese-intake | PS | 0.198413 | -0.20329 | 0.63513 | 0.0393675 | 0 | 0.40671 | 0.321615 | 0.702135421 | 12 | 27797263 | 28753585 |
| cheese-intake | PS | 0.904818 | 0.18414 | 1 | 0.818695 | 0.04064 | 1 | 0.0173403 | 0.283368889 | 12 | 28753586 | 29647193 |
| cheese-intake | PS | -0.37275 | -1 | 0.16377 | 0.138942 | 0 | 1 | 0.162437 | 0.574155024 | 12 | 29647194 | 30358377 |
| cheese-intake | PS | 0.0540232 | -0.49564 | 0.62754 | 0.00291851 | 0 | 0.49284 | 0.824276 | 0.944640651 | 12 | 40017397 | 41198229 |
| cheese-intake | PS | 1 | 0.39308 | 1 | 1 | 0.15451 | 1 | 0.000953218 | 0.114566731 | 12 | 43980532 | 44923825 |
| cheese-intake | PS | -0.124936 | -0.50214 | 0.23008 | 0.0156091 | 0 | 0.25461 | 0.476949 | 0.800410688 | 12 | 48960266 | 50344346 |
| cheese-intake | PS | -0.309819 | -0.84583 | 0.09347 | 0.095988 | 0 | 0.71578 | 0.13273 | 0.538133195 | 12 | 51769420 | 53039987 |
| cheese-intake | PS | -0.111318 | -0.50076 | 0.2502 | 0.0123918 | 0 | 0.25187 | 0.537903 | 0.834976805 | 12 | 54371449 | 55416802 |
| cheese-intake | PS | -0.0880404 | -0.36541 | 0.17874 | 0.00775111 | 0 | 0.13411 | 0.518775 | 0.822603387 | 12 | 55416803 | 56987105 |
| cheese-intake | PS | -0.179877 | -0.70378 | 0.24392 | 0.0323558 | 0 | 0.49784 | 0.394067 | 0.755295083 | 12 | 56987106 | 58748139 |
| cheese-intake | PS | -0.117422 | -0.92324 | 0.56156 | 0.0137878 | 0 | 1 | 0.673847 | 0.89679545 | 12 | 58748140 | 60000363 |
| cheese-intake | PS | 0.716663 | 0.2047 | 1 | 0.513606 | 0.04322 | 1 | 0.00900426 | 0.224487887 | 12 | 61737954 | 63055936 |
| cheese-intake | PS | -0.341289 | -1 | 0.26973 | 0.116478 | 0 | 1 | 0.24387 | 0.635037917 | 12 | 63055937 | 63764111 |
| cheese-intake | PS | -0.0585283 | -0.9726 | 0.78836 | 0.00342557 | 0 | 1 | 0.859992 | 0.95628102 | 12 | 64403858 | 66114643 |
| cheese-intake | PS | -0.232611 | -0.73159 | 0.17954 | 0.0541078 | 0 | 0.53558 | 0.256598 | 0.643621228 | 12 | 66114644 | 67183620 |
| cheese-intake | PS | 0.201213 | -0.67242 | 1 | 0.0404866 | 0 | 1 | 0.579707 | 0.853279664 | 12 | 67183621 | 68006682 |
| cheese-intake | PS | -0.276935 | -1 | 0.33641 | 0.076693 | 0 | 1 | 0.33479 | 0.713246439 | 12 | 68006683 | 68839661 |
| cheese-intake | PS | -0.108861 | -0.8798 | 0.56076 | 0.0118507 | 0 | 0.8769 | 0.711637 | 0.906057359 | 12 | 70097806 | 71177961 |
| cheese-intake | PS | -0.0823694 | -0.66495 | 0.44723 | 0.00678472 | 0 | 0.48196 | 0.737905 | 0.917849189 | 12 | 79315179 | 80952472 |
| cheese-intake | PS | -0.738126 | -1 | -0.09472 | 0.544829 | 0.01781 | 1 | 0.0304078 | 0.318452682 | 12 | 80952473 | 81843890 |
| cheese-intake | PS | 0.0889166 | -0.86305 | 1 | 0.00790615 | 0 | 1 | 0.805478 | 0.941740696 | 12 | 81843891 | 82576129 |
| cheese-intake | PS | -0.342051 | -0.96318 | 0.11056 | 0.116999 | 0 | 0.92856 | 0.137714 | 0.540048903 | 12 | 88344765 | 90567001 |
| cheese-intake | PS | -0.221983 | -0.93671 | 0.30113 | 0.0492767 | 0 | 0.89643 | 0.379995 | 0.747107314 | 12 | 92061180 | 93487547 |
| cheese-intake | PS | -0.0500958 | -0.44844 | 0.33635 | 0.00250959 | 0 | 0.21908 | 0.787347 | 0.933152665 | 12 | 94385885 | 95147845 |
| cheese-intake | PS | 0.720426 | 0.29135 | 1 | 0.519013 | 0.08488 | 1 | 0.00215497 | 0.145139734 | 12 | 96017783 | 96828314 |
| cheese-intake | PS | -0.00664547 | -0.92399 | 0.87889 | 0.0000442 | 0 | 1 | 0.983945 | 0.997072408 | 12 | 97814022 | 99244337 |
| cheese-intake | PS | -0.346692 | -1 | 0.14852 | 0.120195 | 0 | 1 | 0.168704 | 0.581210194 | 12 | 99244338 | 100931423 |
| cheese-intake | PS | -0.248013 | -1 | 0.49671 | 0.0615103 | 0 | 1 | 0.452575 | 0.787485322 | 12 | 100931424 | 101825061 |
| cheese-intake | PS | -0.14201 | -0.81351 | 0.44475 | 0.0201669 | 0 | 0.72551 | 0.59142 | 0.855475038 | 12 | 101825062 | 102966633 |
| cheese-intake | PS | 0.0902529 | -0.51977 | 0.73609 | 0.00814559 | 0 | 0.62072 | 0.731159 | 0.915496478 | 12 | 102966634 | 104140831 |
| cheese-intake | PS | 0.155925 | -0.39228 | 0.85593 | 0.0243127 | 0 | 0.77649 | 0.537618 | 0.834931235 | 12 | 106153788 | 106964977 |
| cheese-intake | PS | -0.468105 | -1 | 0.15831 | 0.219122 | 0 | 1 | 0.125701 | 0.529965172 | 12 | 106964978 | 108183188 |
| cheese-intake | PS | 0.132044 | -0.70807 | 1 | 0.0174357 | 0 | 1 | 0.70271 | 0.903972224 | 12 | 108183189 | 109031819 |
| cheese-intake | PS | 0.0366436 | -0.39201 | 0.47343 | 0.00134275 | 0 | 0.26336 | 0.852991 | 0.955373322 | 12 | 109031820 | 110111514 |
| cheese-intake | PS | 0.240944 | -0.1683 | 0.78341 | 0.0580538 | 0 | 0.61718 | 0.224243 | 0.620938095 | 12 | 111592382 | 113947983 |
| cheese-intake | PS | 0.203192 | -0.70698 | 1 | 0.0412869 | 0 | 1 | 0.579739 | 0.853279664 | 12 | 115439452 | 116197675 |
| cheese-intake | PS | -0.125662 | -0.50207 | 0.23417 | 0.0157909 | 0 | 0.25507 | 0.467609 | 0.797004519 | 12 | 116197676 | 117091843 |
| cheese-intake | PS | 0.337509 | 0.03689 | 0.67872 | 0.113912 | 0.00265 | 0.46066 | 0.0303853 | 0.318452682 | 12 | 117091844 | 118256124 |
| cheese-intake | PS | -0.245891 | -1 | 0.78084 | 0.0604624 | 0 | 1 | 0.559003 | 0.844653041 | 12 | 118256125 | 119301061 |
| cheese-intake | PS | 0.180714 | -0.24314 | 0.6478 | 0.0326576 | 0 | 0.42147 | 0.376072 | 0.744326334 | 12 | 119301062 | 120567740 |
| cheese-intake | PS | 0.22035 | -0.23807 | 0.76111 | 0.0485542 | 0 | 0.58004 | 0.324446 | 0.704548295 | 12 | 123396635 | 124843768 |
| cheese-intake | PS | 0.081724 | -0.40306 | 0.59545 | 0.00667882 | 0 | 0.4045 | 0.702452 | 0.903972224 | 12 | 127545378 | 128372588 |
| cheese-intake | PS | 0.300304 | -0.54957 | 1 | 0.0901828 | 0 | 1 | 0.414233 | 0.767893591 | 12 | 129170297 | 129887418 |
| cheese-intake | PS | -0.177783 | -1 | 0.68997 | 0.0316067 | 0 | 1 | 0.620162 | 0.867109031 | 12 | 130629841 | 131404042 |
| cheese-intake | PS | 0.230564 | -0.31625 | 0.95382 | 0.0531597 | 0 | 0.93702 | 0.382054 | 0.749041221 | 12 | 132012317 | 132957945 |
| cheese-intake | PS | 0.146027 | -0.30121 | 0.63904 | 0.021324 | 0 | 0.41643 | 0.4933 | 0.810421429 | 13 | 20491182 | 21540733 |
| cheese-intake | PS | 0.16759 | -0.54242 | 1 | 0.0280863 | 0 | 1 | 0.588906 | 0.855475038 | 13 | 22795189 | 23729049 |
| cheese-intake | PS | 0.00932445 | -1 | 0.99443 | 0.0000869 | 0 | 1 | 0.979351 | 0.996292185 | 13 | 23729050 | 24818333 |
| cheese-intake | PS | 0.266576 | -0.4698 | 1 | 0.0710625 | 0 | 1 | 0.415459 | 0.767893591 | 13 | 26681710 | 27392005 |
| cheese-intake | PS | -0.276295 | -1 | 0.32049 | 0.0763391 | 0 | 1 | 0.329472 | 0.708397335 | 13 | 27392006 | 28587125 |
| cheese-intake | PS | 0.211635 | -0.16911 | 0.66625 | 0.0447894 | 0 | 0.44431 | 0.263655 | 0.648292399 | 13 | 28587126 | 30068525 |
| cheese-intake | PS | -0.173977 | -1 | 0.7591 | 0.0302678 | 0 | 1 | 0.639539 | 0.874313258 | 13 | 30068526 | 31433218 |
| cheese-intake | PS | -0.393556 | -1 | 0.08527 | 0.154886 | 0 | 1 | 0.0969652 | 0.483313733 | 13 | 31433219 | 32986686 |
| cheese-intake | PS | 0.558703 | 0.11293 | 1 | 0.312149 | 0.01522 | 1 | 0.0173722 | 0.283368889 | 13 | 35744569 | 36579413 |
| cheese-intake | PS | -0.0100105 | -0.33722 | 0.30732 | 0.00010021 | 0 | 0.13904 | 0.949113 | 0.98795147 | 13 | 40091624 | 41003943 |
| cheese-intake | PS | -0.231515 | -0.92345 | 0.31734 | 0.053599 | 0 | 0.86723 | 0.370258 | 0.743772391 | 13 | 41003944 | 42037054 |
| cheese-intake | PS | -0.0402534 | -0.44568 | 0.35567 | 0.00162033 | 0 | 0.22582 | 0.831595 | 0.946695205 | 13 | 42950158 | 43931931 |
| cheese-intake | PS | 0.415432 | 0.01968 | 0.92613 | 0.172584 | 0.00303 | 0.85772 | 0.0427298 | 0.35870143 | 13 | 43931932 | 45476446 |
| cheese-intake | PS | -0.0325083 | -0.61061 | 0.53392 | 0.00105679 | 0 | 0.48666 | 0.896787 | 0.971785522 | 13 | 45476447 | 46493236 |
| cheese-intake | PS | 0.130254 | -0.40118 | 0.74133 | 0.0169661 | 0 | 0.5814 | 0.600396 | 0.858740648 | 13 | 46493237 | 47433528 |
| cheese-intake | PS | 0.491114 | 0.03972 | 1 | 0.241193 | 0.00479 | 1 | 0.0393075 | 0.352687624 | 13 | 47433529 | 48137479 |
| cheese-intake | PS | 0.0651843 | -0.58479 | 0.76955 | 0.004249 | 0 | 0.70984 | 0.815072 | 0.944542385 | 13 | 49381728 | 50419896 |
| cheese-intake | PS | 0.0936648 | -0.23265 | 0.42821 | 0.0087731 | 0 | 0.18648 | 0.563436 | 0.845671864 | 13 | 50419897 | 51554236 |
| cheese-intake | PS | 0.188168 | -0.46882 | 1 | 0.0354072 | 0 | 1 | 0.514744 | 0.822603387 | 13 | 53336572 | 54684856 |
| cheese-intake | PS | 0.205893 | -0.92039 | 1 | 0.0423918 | 0 | 1 | 0.627465 | 0.869084262 | 13 | 54684857 | 55576912 |
| cheese-intake | PS | 0.0216651 | -0.56365 | 0.62617 | 0.000469375 | 0 | 0.51909 | 0.932641 | 0.981632454 | 13 | 56434008 | 58245843 |
| cheese-intake | PS | -0.368164 | -0.88428 | 0.04464 | 0.135545 | 0 | 0.78195 | 0.0814887 | 0.460358212 | 13 | 66382287 | 67718879 |
| cheese-intake | PS | 0.33447 | -0.37251 | 1 | 0.11187 | 0 | 1 | 0.319194 | 0.699186857 | 13 | 67718880 | 69004702 |
| cheese-intake | PS | 0.145787 | -0.37977 | 0.73047 | 0.0212537 | 0 | 0.55681 | 0.550174 | 0.843473948 | 13 | 71010209 | 71976862 |
| cheese-intake | PS | 0.138348 | -0.44016 | 0.85971 | 0.0191403 | 0 | 0.78846 | 0.60054 | 0.858740648 | 13 | 71976863 | 73114509 |
| cheese-intake | PS | 0.208789 | -0.36084 | 1 | 0.0435929 | 0 | 1 | 0.443868 | 0.782424675 | 13 | 75882385 | 76671493 |
| cheese-intake | PS | 0.112713 | -0.79777 | 1 | 0.0127042 | 0 | 1 | 0.75291 | 0.923275238 | 13 | 79489046 | 80778339 |
| cheese-intake | PS | -0.322726 | -1 | 0.2644 | 0.104152 | 0 | 1 | 0.264946 | 0.650122942 | 13 | 80778340 | 81724089 |
| cheese-intake | PS | -1 | -1 | -0.22671 | 1 | 0.05371 | 1 | 0.0114285 | 0.251698291 | 13 | 86321289 | 87043588 |
| cheese-intake | PS | -0.0593907 | -0.63388 | 0.48451 | 0.00352726 | 0 | 0.47185 | 0.809271 | 0.943074686 | 13 | 91764205 | 93285142 |
| cheese-intake | PS | -0.144791 | -0.5101 | 0.19336 | 0.0209643 | 0 | 0.2631 | 0.385172 | 0.751421205 | 13 | 94925137 | 96132647 |
| cheese-intake | PS | 0.103709 | -0.30151 | 0.53805 | 0.0107556 | 0 | 0.29609 | 0.594449 | 0.856160011 | 13 | 98527336 | 99402294 |
| cheese-intake | PS | -0.340853 | -1 | 0.22395 | 0.116181 | 0 | 1 | 0.218483 | 0.615142653 | 13 | 100470869 | 101573736 |
| cheese-intake | PS | 0.13965 | -0.33853 | 0.70889 | 0.0195022 | 0 | 0.53318 | 0.510865 | 0.822603387 | 13 | 101573737 | 103050417 |
| cheese-intake | PS | -0.672512 | -1 | -0.13297 | 0.452273 | 0.02059 | 1 | 0.0183165 | 0.284865186 | 13 | 103050418 | 104378435 |
| cheese-intake | PS | 0.0983023 | -0.44694 | 0.66975 | 0.00966334 | 0 | 0.49407 | 0.687766 | 0.900892552 | 13 | 104378436 | 105672500 |
| cheese-intake | PS | 0.0472495 | -0.38875 | 0.48731 | 0.00223251 | 0 | 0.27586 | 0.81419 | 0.944542385 | 13 | 108521979 | 109156765 |
| cheese-intake | PS | 0.167261 | -0.58109 | 1 | 0.0279762 | 0 | 1 | 0.596728 | 0.856751476 | 13 | 109156766 | 109813576 |
| cheese-intake | PS | -0.308081 | -0.90223 | 0.14743 | 0.0949142 | 0 | 0.81424 | 0.173222 | 0.582296617 | 13 | 109813577 | 110995432 |
| cheese-intake | PS | 0.497296 | 0.15584 | 0.93049 | 0.247303 | 0.02482 | 0.86581 | 0.00615085 | 0.200879756 | 13 | 111621245 | 112319064 |
| cheese-intake | PS | -0.251645 | -0.91376 | 0.24123 | 0.0633252 | 0 | 0.84876 | 0.290392 | 0.67501725 | 13 | 113573119 | 114302561 |
| cheese-intake | PS | -0.210497 | -1 | 1 | 0.0443089 | 0 | 1 | 0.637358 | 0.873870499 | 14 | 21982655 | 22760700 |
| cheese-intake | PS | -0.0655841 | -0.59022 | 0.39066 | 0.00430127 | 0 | 0.39108 | 0.751105 | 0.922735859 | 14 | 22760701 | 23985936 |
| cheese-intake | PS | -0.0885539 | -1 | 0.88347 | 0.00784179 | 0 | 1 | 0.803184 | 0.941469324 | 14 | 23985937 | 24906056 |
| cheese-intake | PS | -0.347376 | -1 | 0.16602 | 0.12067 | 0 | 1 | 0.175312 | 0.582296617 | 14 | 26395691 | 27720240 |
| cheese-intake | PS | 0.173719 | -0.29469 | 0.69949 | 0.0301783 | 0 | 0.49887 | 0.436677 | 0.77623651 | 14 | 27720241 | 29029224 |
| cheese-intake | PS | 0.316094 | -0.1019 | 0.81057 | 0.0999154 | 0 | 0.65703 | 0.12156 | 0.522388105 | 14 | 30831155 | 32382245 |
| cheese-intake | PS | -0.408403 | -1 | 0.13403 | 0.166793 | 0 | 1 | 0.126753 | 0.530737562 | 14 | 33591114 | 34695195 |
| cheese-intake | PS | 0.130265 | -0.19337 | 0.46634 | 0.0169688 | 0 | 0.21747 | 0.418136 | 0.767893591 | 14 | 34695196 | 35379988 |
| cheese-intake | PS | 0.0881724 | -0.27248 | 0.47882 | 0.00777437 | 0 | 0.238 | 0.613295 | 0.863169606 | 14 | 35379989 | 36422077 |
| cheese-intake | PS | 0.328508 | -0.08846 | 0.85644 | 0.107917 | 0 | 0.73349 | 0.118165 | 0.518364615 | 14 | 36422078 | 37282012 |
| cheese-intake | PS | 0.389091 | -0.17778 | 1 | 0.151392 | 0 | 1 | 0.167708 | 0.579300708 | 14 | 51418372 | 52206122 |
| cheese-intake | PS | 0.292083 | -0.15878 | 0.85079 | 0.0853125 | 0 | 0.72788 | 0.185101 | 0.58904054 | 14 | 54359599 | 55292832 |
| cheese-intake | PS | -0.457244 | -1 | 0.0071 | 0.209072 | 0 | 1 | 0.0519292 | 0.37957642 | 14 | 56206431 | 57460781 |
| cheese-intake | PS | -0.764638 | -1 | -0.22336 | 0.584671 | 0.05049 | 1 | 0.00729443 | 0.205706476 | 14 | 58447799 | 59447537 |
| cheese-intake | PS | -0.401336 | -1 | 0.14675 | 0.161071 | 0 | 1 | 0.134159 | 0.538946241 | 14 | 66300067 | 67891839 |
| cheese-intake | PS | -0.42493 | -0.77766 | -0.1301 | 0.180565 | 0.01716 | 0.60476 | 0.00730617 | 0.205706476 | 14 | 69794543 | 71140426 |
| cheese-intake | PS | -0.473492 | -1 | 0.1029 | 0.224195 | 0 | 1 | 0.0955967 | 0.482879102 | 14 | 71140427 | 72665319 |
| cheese-intake | PS | 0.0315294 | -0.72345 | 0.83789 | 0.000994102 | 0 | 0.99089 | 0.916293 | 0.977166335 | 14 | 72665320 | 73373373 |
| cheese-intake | PS | -0.0757931 | -1 | 0.71445 | 0.00574459 | 0 | 1 | 0.817762 | 0.944542385 | 14 | 75699502 | 76694201 |
| cheese-intake | PS | 0.210101 | -0.24953 | 0.72972 | 0.0441426 | 0 | 0.53311 | 0.3381 | 0.714714951 | 14 | 76694202 | 77425453 |
| cheese-intake | PS | -0.553955 | -1 | 0.06558 | 0.306866 | 0 | 1 | 0.0793741 | 0.4584705 | 14 | 77425454 | 78374053 |
| cheese-intake | PS | -0.0800453 | -0.91146 | 0.6308 | 0.00640725 | 0 | 0.99392 | 0.78814 | 0.933152665 | 14 | 79199452 | 81001920 |
| cheese-intake | PS | 0.290248 | -0.45673 | 1 | 0.0842439 | 0 | 1 | 0.393066 | 0.754486297 | 14 | 82524786 | 84087372 |
| cheese-intake | PS | 0.112896 | -0.45291 | 0.81398 | 0.0127455 | 0 | 0.75452 | 0.660424 | 0.890931344 | 14 | 84087373 | 85562936 |
| cheese-intake | PS | 0.456859 | -0.06554 | 1 | 0.20872 | 0 | 1 | 0.0897101 | 0.478016906 | 14 | 85562937 | 86653343 |
| cheese-intake | PS | -0.158934 | -1 | 0.75122 | 0.02526 | 0 | 1 | 0.663584 | 0.891843705 | 14 | 90662837 | 92101228 |
| cheese-intake | PS | 0.226884 | -0.20042 | 0.73429 | 0.0514763 | 0 | 0.54528 | 0.28185 | 0.668498257 | 14 | 93386329 | 94892240 |
| cheese-intake | PS | 0.0460105 | -0.76553 | 0.89467 | 0.00211697 | 0 | 1 | 0.88587 | 0.968348232 | 14 | 95946793 | 97174314 |
| cheese-intake | PS | -0.125119 | -0.50666 | 0.23748 | 0.0156548 | 0 | 0.26133 | 0.483586 | 0.803210186 | 14 | 97174315 | 98268391 |
| cheese-intake | PS | -0.129779 | -0.71807 | 0.40016 | 0.0168426 | 0 | 0.54642 | 0.590797 | 0.855475038 | 14 | 98268392 | 98885322 |
| cheese-intake | PS | -0.728944 | -1 | 0.05743 | 0.531359 | 0 | 1 | 0.0778091 | 0.457283004 | 14 | 98885323 | 99474533 |
| cheese-intake | PS | 0.288182 | -0.1233 | 0.81405 | 0.0830487 | 0 | 0.66362 | 0.163747 | 0.575051292 | 14 | 99474534 | 100786189 |
| cheese-intake | PS | 0.642335 | 0.19605 | 1 | 0.412595 | 0.03946 | 1 | 0.00633549 | 0.200879756 | 14 | 100786190 | 102004377 |
| cheese-intake | PS | 0.452052 | -0.22269 | 1 | 0.204351 | 0 | 1 | 0.178092 | 0.582803181 | 14 | 104439107 | 105091340 |
| cheese-intake | PS | 0.596561 | -0.07504 | 1 | 0.355885 | 0 | 1 | 0.0795168 | 0.4584705 | 14 | 105091341 | 106347143 |
| cheese-intake | PS | 0.551867 | 0.05506 | 1 | 0.304557 | 0.00706 | 1 | 0.0353103 | 0.342762835 | 15 | 29141036 | 30604119 |
| cheese-intake | PS | 0.449918 | -0.12282 | 1 | 0.202426 | 0 | 1 | 0.110342 | 0.508421114 | 15 | 30604120 | 32177320 |
| cheese-intake | PS | -0.103103 | -0.68574 | 0.42601 | 0.0106303 | 0 | 0.51434 | 0.673625 | 0.89679545 | 15 | 32177321 | 33484267 |
| cheese-intake | PS | 0.283004 | -0.51962 | 1 | 0.0800912 | 0 | 1 | 0.423307 | 0.770206497 | 15 | 33484268 | 34410072 |
| cheese-intake | PS | 0.00957574 | -0.41743 | 0.43225 | 0.0000917 | 0 | 0.24807 | 0.961574 | 0.991317435 | 15 | 34410073 | 35118927 |
| cheese-intake | PS | -0.587235 | -1 | -0.0473 | 0.344845 | 0.00631 | 1 | 0.0410435 | 0.357174253 | 15 | 37962916 | 39238840 |
| cheese-intake | PS | -0.325099 | -1 | 0.22182 | 0.105689 | 0 | 1 | 0.226331 | 0.620938095 | 15 | 39238841 | 40604780 |
| cheese-intake | PS | -0.189738 | -0.89293 | 0.40501 | 0.0360004 | 0 | 0.82248 | 0.483746 | 0.803210186 | 15 | 46022643 | 46884071 |
| cheese-intake | PS | 0.420046 | 0.06938 | 0.82342 | 0.176439 | 0.00622 | 0.67802 | 0.0226897 | 0.29880871 | 15 | 46884072 | 47693316 |
| cheese-intake | PS | -0.103832 | -0.81956 | 0.52699 | 0.0107812 | 0 | 0.79143 | 0.691347 | 0.901732948 | 15 | 47693317 | 49260006 |
| cheese-intake | PS | -0.452182 | -1 | 0.04815 | 0.204469 | 0 | 1 | 0.0806408 | 0.460358212 | 15 | 54332800 | 55136717 |
| cheese-intake | PS | -0.50078 | -1 | -0.02725 | 0.250781 | 0.00388 | 1 | 0.0403605 | 0.356263224 | 15 | 57641165 | 58712954 |
| cheese-intake | PS | 0.273036 | -0.07117 | 0.66597 | 0.0745485 | 0 | 0.44352 | 0.120396 | 0.518850788 | 15 | 59901117 | 61130595 |
| cheese-intake | PS | -0.189267 | -0.73431 | 0.27552 | 0.0358221 | 0 | 0.54638 | 0.400297 | 0.759911474 | 15 | 61130596 | 62106138 |
| cheese-intake | PS | 0.3216 | -0.02895 | 0.72899 | 0.103426 | 0 | 0.53143 | 0.0711715 | 0.442754512 | 15 | 62106139 | 63218978 |
| cheese-intake | PS | 0.0806927 | -0.72815 | 0.99005 | 0.00651132 | 0 | 1 | 0.800336 | 0.940589196 | 15 | 64339946 | 66355634 |
| cheese-intake | PS | 0.288586 | -0.14351 | 0.80433 | 0.0832821 | 0 | 0.64694 | 0.176135 | 0.582296617 | 15 | 66355635 | 67396520 |
| cheese-intake | PS | -0.0208444 | -0.51001 | 0.46444 | 0.00043449 | 0 | 0.33873 | 0.921776 | 0.978712749 | 15 | 79292537 | 79998206 |
| cheese-intake | PS | -0.572384 | -1 | -0.17592 | 0.327623 | 0.03127 | 1 | 0.00590886 | 0.200879756 | 15 | 79998207 | 81077025 |
| cheese-intake | PS | -0.125344 | -1 | 1 | 0.0157111 | 0 | 1 | 0.781998 | 0.932381018 | 15 | 85494084 | 86341598 |
| cheese-intake | PS | 0.132691 | -0.26918 | 0.56015 | 0.0176069 | 0 | 0.31754 | 0.500661 | 0.814040339 | 15 | 86341599 | 87158587 |
| cheese-intake | PS | 0.0690976 | -0.34702 | 0.52644 | 0.00477448 | 0 | 0.30117 | 0.735645 | 0.917848257 | 15 | 87158588 | 88035757 |
| cheese-intake | PS | -0.0704654 | -0.39833 | 0.24739 | 0.00496538 | 0 | 0.16563 | 0.651844 | 0.884471335 | 15 | 89385188 | 90632718 |
| cheese-intake | PS | 0.324302 | -0.5978 | 1 | 0.105172 | 0 | 1 | 0.40993 | 0.767238613 | 15 | 90632719 | 91593623 |
| cheese-intake | PS | 0.14057 | -0.59549 | 1 | 0.0197598 | 0 | 1 | 0.653534 | 0.886028246 | 15 | 91593624 | 92675405 |
| cheese-intake | PS | -0.12618 | -0.97918 | 0.57747 | 0.0159215 | 0 | 1 | 0.68056 | 0.898790522 | 15 | 92675406 | 93707010 |
| cheese-intake | PS | 0.70241 | 0.2125 | 1 | 0.493379 | 0.04618 | 1 | 0.00696682 | 0.205706476 | 15 | 93707011 | 94565521 |
| cheese-intake | PS | -0.168572 | -0.52526 | 0.16344 | 0.0284165 | 0 | 0.2759 | 0.308234 | 0.690461073 | 15 | 94565522 | 95662425 |
| cheese-intake | PS | 0.0988357 | -0.27408 | 0.49466 | 0.0097685 | 0 | 0.25256 | 0.586276 | 0.855475038 | 15 | 95662426 | 96864278 |
| cheese-intake | PS | -0.160483 | -0.62849 | 0.24831 | 0.0257547 | 0 | 0.40015 | 0.412917 | 0.767893591 | 15 | 96864279 | 98025684 |
| cheese-intake | PS | 0.345138 | -0.31007 | 1 | 0.11912 | 0 | 1 | 0.263803 | 0.648292399 | 15 | 98828262 | 99925972 |
| cheese-intake | PS | 0.200645 | -0.34707 | 0.87402 | 0.0402584 | 0 | 0.77731 | 0.429937 | 0.772599009 | 15 | 99925973 | 100742117 |
| cheese-intake | PS | 0.0159683 | -0.68922 | 0.72622 | 0.000254988 | 0 | 0.75472 | 0.95538 | 0.989305986 | 15 | 100742118 | 101550750 |
| cheese-intake | PS | -0.61504 | -1 | -0.1049 | 0.378274 | 0.01496 | 1 | 0.0220317 | 0.295914324 | 15 | 101550751 | 102520975 |
| cheese-intake | PS | -0.519198 | -1 | -0.03945 | 0.269567 | 0.00573 | 1 | 0.034179 | 0.337246568 | 16 | 4816146 | 5782968 |
| cheese-intake | PS | -0.263413 | -1 | 0.38434 | 0.0693865 | 0 | 1 | 0.377874 | 0.74480174 | 16 | 5782969 | 6446081 |
| cheese-intake | PS | -0.186635 | -0.86677 | 0.34339 | 0.0348326 | 0 | 0.77247 | 0.451176 | 0.786475108 | 16 | 7051430 | 7704354 |
| cheese-intake | PS | 0.018639 | -0.35266 | 0.40516 | 0.000347413 | 0 | 0.19729 | 0.916802 | 0.977166335 | 16 | 8341013 | 9104469 |
| cheese-intake | PS | 0.220038 | -0.4088 | 1 | 0.0484169 | 0 | 1 | 0.431373 | 0.772822169 | 16 | 9104470 | 9754796 |
| cheese-intake | PS | -0.307294 | -0.74526 | 0.05614 | 0.0944297 | 0 | 0.55542 | 0.0996318 | 0.48639381 | 16 | 10351809 | 11022542 |
| cheese-intake | PS | 0.0481878 | -0.29044 | 0.41181 | 0.00232206 | 0 | 0.18714 | 0.773331 | 0.92959111 | 16 | 11022543 | 11916631 |
| cheese-intake | PS | -0.367064 | -1 | 0.23439 | 0.134736 | 0 | 1 | 0.19635 | 0.600448596 | 16 | 11916632 | 12793149 |
| cheese-intake | PS | 0.24299 | -0.18952 | 0.73825 | 0.0590442 | 0 | 0.54768 | 0.247313 | 0.637199691 | 16 | 12793150 | 13893407 |
| cheese-intake | PS | -0.438246 | -0.9816 | -0.02755 | 0.192059 | 0.00318 | 0.96354 | 0.0369611 | 0.35091556 | 16 | 13893408 | 15921108 |
| cheese-intake | PS | 0.138805 | -0.22262 | 0.53049 | 0.0192668 | 0 | 0.28455 | 0.433469 | 0.774034857 | 16 | 15921109 | 17343277 |
| cheese-intake | PS | 0.529023 | 0.08868 | 1 | 0.279865 | 0.01081 | 1 | 0.0180608 | 0.283589292 | 16 | 17343278 | 19104257 |
| cheese-intake | PS | -0.566108 | -1 | -0.2114 | 0.320479 | 0.04469 | 1 | 0.00293475 | 0.167709644 | 16 | 19104258 | 20351261 |
| cheese-intake | PS | -0.479805 | -1 | 0.01765 | 0.230213 | 0 | 1 | 0.060534 | 0.407637204 | 16 | 24014706 | 25235251 |
| cheese-intake | PS | 0.170901 | -0.29028 | 0.72529 | 0.029207 | 0 | 0.54062 | 0.428725 | 0.772599009 | 16 | 25235252 | 26154122 |
| cheese-intake | PS | 0.45724 | 0.22119 | 0.71692 | 0.209069 | 0.04893 | 0.51397 | 0.000274252 | 0.05598169 | 16 | 26154123 | 27443061 |
| cheese-intake | PS | -0.172278 | -0.58049 | 0.18887 | 0.0296798 | 0 | 0.33935 | 0.33777 | 0.714479806 | 16 | 27443062 | 29043177 |
| cheese-intake | PS | 0.114979 | -0.23089 | 0.46966 | 0.0132201 | 0 | 0.22419 | 0.504962 | 0.818464463 | 16 | 29043178 | 31384210 |
| cheese-intake | PS | -0.151991 | -1 | 0.93002 | 0.0231013 | 0 | 1 | 0.716741 | 0.906613519 | 16 | 32847929 | 35259453 |
| cheese-intake | PS | -0.151119 | -1 | 0.59978 | 0.0228371 | 0 | 1 | 0.643014 | 0.877961423 | 16 | 35259454 | 49010761 |
| cheese-intake | PS | 0.184301 | -0.3478 | 0.81542 | 0.0339669 | 0 | 0.67886 | 0.455859 | 0.790656151 | 16 | 53393883 | 54866095 |
| cheese-intake | PS | 0.340413 | -0.20367 | 1 | 0.115881 | 0 | 1 | 0.194774 | 0.599635753 | 16 | 54866096 | 55907389 |
| cheese-intake | PS | -0.2309 | -1 | 0.46209 | 0.053315 | 0 | 1 | 0.470471 | 0.797472807 | 16 | 58508979 | 59885499 |
| cheese-intake | PS | -0.444453 | -1 | 0.07774 | 0.197539 | 0 | 1 | 0.0917265 | 0.479791573 | 16 | 59885500 | 61092844 |
| cheese-intake | PS | -0.185956 | -0.64418 | 0.20918 | 0.0345796 | 0 | 0.41657 | 0.340842 | 0.716609936 | 16 | 61092845 | 62607090 |
| cheese-intake | PS | -0.314318 | -1 | 0.32975 | 0.0987961 | 0 | 1 | 0.283491 | 0.6689896 | 16 | 62607091 | 64207176 |
| cheese-intake | PS | -0.322079 | -0.94144 | 0.17144 | 0.103735 | 0 | 0.88937 | 0.182053 | 0.586375836 | 16 | 65072404 | 65882820 |
| cheese-intake | PS | -0.0311009 | -0.58035 | 0.50007 | 0.000967265 | 0 | 0.41873 | 0.897224 | 0.971785522 | 16 | 65882821 | 66738843 |
| cheese-intake | PS | 0.239446 | -0.50391 | 1 | 0.0573343 | 0 | 1 | 0.470189 | 0.797472807 | 16 | 68435729 | 69549149 |
| cheese-intake | PS | 0.0304408 | -0.32128 | 0.38983 | 0.000926644 | 0 | 0.18019 | 0.856263 | 0.955614217 | 16 | 72089512 | 73140781 |
| cheese-intake | PS | 0.160385 | -0.48801 | 1 | 0.0257235 | 0 | 1 | 0.582774 | 0.855326666 | 16 | 73140782 | 74135275 |
| cheese-intake | PS | -0.654599 | -1 | -0.21926 | 0.4285 | 0.04811 | 1 | 0.00583707 | 0.200879756 | 16 | 77270666 | 77739132 |
| cheese-intake | PS | -0.334564 | -1 | 0.18356 | 0.111933 | 0 | 1 | 0.190037 | 0.596557161 | 16 | 77739133 | 78280636 |
| cheese-intake | PS | -0.525728 | -1 | 0.04356 | 0.27639 | 0 | 1 | 0.0636816 | 0.419256682 | 16 | 78280637 | 78973580 |
| cheese-intake | PS | -0.383414 | -1 | 0.19022 | 0.147007 | 0 | 1 | 0.167079 | 0.579193756 | 16 | 79662635 | 80559685 |
| cheese-intake | PS | -0.644247 | -1 | -0.10801 | 0.415055 | 0.0143 | 1 | 0.0200839 | 0.292402657 | 16 | 80559686 | 81437861 |
| cheese-intake | PS | -0.311336 | -0.94011 | 0.13664 | 0.0969303 | 0 | 0.88381 | 0.174205 | 0.582296617 | 16 | 83077870 | 83778371 |
| cheese-intake | PS | -0.121525 | -1 | 0.6844 | 0.0147683 | 0 | 1 | 0.717541 | 0.906922951 | 16 | 83778372 | 84440154 |
| cheese-intake | PS | -0.0554347 | -0.66192 | 0.52284 | 0.00307301 | 0 | 0.54447 | 0.824845 | 0.94491188 | 16 | 84440155 | 85146805 |
| cheese-intake | PS | -0.00819287 | -0.69978 | 0.67068 | 0.0000671 | 0 | 0.72219 | 0.976893 | 0.996093315 | 16 | 85146806 | 86058597 |
| cheese-intake | PS | -0.129684 | -0.65621 | 0.35316 | 0.0168179 | 0 | 0.44264 | 0.566165 | 0.846966217 | 16 | 86058598 | 86748867 |
| cheese-intake | PS | -0.423962 | -1 | 0.09384 | 0.179744 | 0 | 1 | 0.0968931 | 0.483313733 | 16 | 86748868 | 87669168 |
| cheese-intake | PS | -0.0542445 | -0.4052 | 0.28819 | 0.00294247 | 0 | 0.17565 | 0.747392 | 0.922169351 | 16 | 87669169 | 88387228 |
| cheese-intake | PS | -0.0687153 | -0.73308 | 0.54887 | 0.0047218 | 0 | 0.67169 | 0.798456 | 0.940238575 | 16 | 89106305 | 90292787 |
| cheese-intake | PS | -0.658162 | -1 | -0.11349 | 0.433177 | 0.01695 | 1 | 0.0221075 | 0.295914324 | 17 | 52 | 815653 |
| cheese-intake | PS | -0.424443 | -0.85574 | -0.07741 | 0.180152 | 0.00765 | 0.73228 | 0.0207098 | 0.292402657 | 17 | 815654 | 1480056 |
| cheese-intake | PS | -0.0795568 | -0.42836 | 0.25733 | 0.00632929 | 0 | 0.18844 | 0.634797 | 0.872946106 | 17 | 1480057 | 2699135 |
| cheese-intake | PS | 0.0229454 | -0.55796 | 0.60866 | 0.000526494 | 0 | 0.49865 | 0.927227 | 0.980084322 | 17 | 2699136 | 3430440 |
| cheese-intake | PS | 0.262331 | -0.09532 | 0.66527 | 0.0688177 | 0 | 0.44259 | 0.139342 | 0.541774967 | 17 | 5573785 | 6305078 |
| cheese-intake | PS | 0.0254797 | -0.474 | 0.57561 | 0.000649217 | 0 | 0.42681 | 0.909118 | 0.976382568 | 17 | 6305079 | 7264458 |
| cheese-intake | PS | 0.154702 | -0.09242 | 0.41054 | 0.0239328 | 0 | 0.16855 | 0.209054 | 0.606076286 | 17 | 7264459 | 8554763 |
| cheese-intake | PS | 0.122473 | -0.37669 | 0.66867 | 0.0149997 | 0 | 0.46457 | 0.601235 | 0.858848038 | 17 | 8554764 | 9619356 |
| cheese-intake | PS | -0.0517889 | -0.50654 | 0.38219 | 0.00268209 | 0 | 0.29152 | 0.799174 | 0.940238575 | 17 | 9619357 | 10572617 |
| cheese-intake | PS | -0.283481 | -1 | 0.2398 | 0.0803613 | 0 | 1 | 0.256309 | 0.643621228 | 17 | 10572618 | 11778164 |
| cheese-intake | PS | 0.0929902 | -0.43385 | 0.63707 | 0.00864719 | 0 | 0.4412 | 0.699005 | 0.903972224 | 17 | 11778165 | 12676353 |
| cheese-intake | PS | 0.154851 | -0.2487 | 0.60981 | 0.0239787 | 0 | 0.3726 | 0.42766 | 0.772599009 | 17 | 12676354 | 13648446 |
| cheese-intake | PS | -0.431933 | -1 | 0.01883 | 0.186566 | 0 | 1 | 0.0624358 | 0.414462038 | 17 | 13648447 | 14508610 |
| cheese-intake | PS | -0.222993 | -1 | 0.47542 | 0.049726 | 0 | 1 | 0.471051 | 0.797472807 | 17 | 14508611 | 15308722 |
| cheese-intake | PS | 0.102693 | -0.51597 | 0.80335 | 0.0105459 | 0 | 0.7762 | 0.701135 | 0.903972224 | 17 | 15308723 | 16405207 |
| cheese-intake | PS | 0.0544154 | -0.75627 | 0.93664 | 0.00296104 | 0 | 1 | 0.866361 | 0.958839385 | 17 | 16405208 | 17326540 |
| cheese-intake | PS | -0.279927 | -0.77641 | 0.1475 | 0.0783589 | 0 | 0.60286 | 0.186055 | 0.589384704 | 17 | 18900979 | 20402494 |
| cheese-intake | PS | 0.0895704 | -0.22564 | 0.40735 | 0.00802285 | 0 | 0.16931 | 0.556579 | 0.84420035 | 17 | 20402495 | 21432873 |
| cheese-intake | PS | -0.198942 | -0.48366 | 0.04823 | 0.039578 | 0 | 0.23393 | 0.116679 | 0.516275157 | 17 | 25872111 | 27344401 |
| cheese-intake | PS | 0.251554 | -0.16946 | 0.748 | 0.0632794 | 0 | 0.56031 | 0.225507 | 0.620938095 | 17 | 27344402 | 29783141 |
| cheese-intake | PS | 0.0860885 | -0.24527 | 0.4247 | 0.00741123 | 0 | 0.18832 | 0.599808 | 0.85844563 | 17 | 29783142 | 31318753 |
| cheese-intake | PS | 0.426315 | -0.05027 | 1 | 0.181745 | 0 | 1 | 0.0750234 | 0.451472473 | 17 | 31318754 | 32356061 |
| cheese-intake | PS | 0.505805 | 0.1283 | 1 | 0.255838 | 0.01727 | 1 | 0.0118887 | 0.252133079 | 17 | 32356062 | 33614189 |
| cheese-intake | PS | 0.433185 | -0.0799 | 1 | 0.187649 | 0 | 1 | 0.0886078 | 0.478010038 | 17 | 33614190 | 34474611 |
| cheese-intake | PS | 0.0704594 | -0.59857 | 0.79954 | 0.00496452 | 0 | 0.81374 | 0.805641 | 0.941740696 | 17 | 34474612 | 36116884 |
| cheese-intake | PS | -0.211668 | -0.574 | 0.11234 | 0.0448033 | 0 | 0.32947 | 0.196146 | 0.600448596 | 17 | 36116885 | 37361178 |
| cheese-intake | PS | 0.382105 | 0.05045 | 0.7675 | 0.146004 | 0.00419 | 0.58905 | 0.0257165 | 0.305371 | 17 | 37361179 | 38880481 |
| cheese-intake | PS | 0.0618966 | -0.39493 | 0.51115 | 0.00383119 | 0 | 0.2927 | 0.766256 | 0.928727895 | 17 | 38880482 | 40233545 |
| cheese-intake | PS | 0.168535 | -0.12188 | 0.49118 | 0.028404 | 0 | 0.24197 | 0.25708 | 0.643621228 | 17 | 40233546 | 42348003 |
| cheese-intake | PS | 0.215585 | -0.34029 | 0.88096 | 0.046477 | 0 | 0.78821 | 0.406006 | 0.764274119 | 17 | 44865833 | 45883901 |
| cheese-intake | PS | 0.154788 | -0.2617 | 0.61985 | 0.0239593 | 0 | 0.38796 | 0.44248 | 0.78178219 | 17 | 45883902 | 47516224 |
| cheese-intake | PS | -0.457192 | -1 | 0.08163 | 0.209025 | 0 | 1 | 0.0962182 | 0.482879102 | 17 | 47516225 | 48722590 |
| cheese-intake | PS | 0.0325826 | -0.38888 | 0.46468 | 0.00106163 | 0 | 0.25872 | 0.8683 | 0.959359878 | 17 | 48722591 | 49909298 |
| cheese-intake | PS | -0.529054 | -1 | 0.03897 | 0.279898 | 0 | 1 | 0.0764542 | 0.453737497 | 17 | 52102650 | 53468006 |
| cheese-intake | PS | -0.152272 | -0.93255 | 0.47737 | 0.0231867 | 0 | 0.94845 | 0.581468 | 0.85428452 | 17 | 54950108 | 56245227 |
| cheese-intake | PS | 0.260979 | -0.24304 | 0.95797 | 0.0681102 | 0 | 0.92617 | 0.285711 | 0.671571837 | 17 | 56245228 | 58652809 |
| cheese-intake | PS | 0.766646 | 0.07232 | 1 | 0.587746 | 0.01506 | 1 | 0.0337335 | 0.335303046 | 17 | 58652810 | 60453120 |
| cheese-intake | PS | -0.281768 | -1 | 0.41589 | 0.0793932 | 0 | 1 | 0.385256 | 0.751421205 | 17 | 64438388 | 65582327 |
| cheese-intake | PS | 0.284726 | -0.17273 | 0.86984 | 0.0810687 | 0 | 0.75792 | 0.206355 | 0.603996364 | 17 | 65582328 | 66757556 |
| cheese-intake | PS | 0.0102822 | -0.57212 | 0.59071 | 0.000105724 | 0 | 0.50221 | 0.967761 | 0.992684493 | 17 | 66757557 | 68176219 |
| cheese-intake | PS | 0.338215 | -0.11485 | 0.93617 | 0.114389 | 0 | 0.87641 | 0.134332 | 0.53897827 | 17 | 70495120 | 71466953 |
| cheese-intake | PS | 0.445278 | -0.07746 | 1 | 0.198272 | 0 | 1 | 0.0989263 | 0.48639381 | 17 | 72383473 | 73741321 |
| cheese-intake | PS | -0.634994 | -1 | -0.21149 | 0.403217 | 0.04473 | 1 | 0.00425999 | 0.178799682 | 17 | 76596288 | 77412786 |
| cheese-intake | PS | -0.157599 | -0.48158 | 0.15704 | 0.0248375 | 0 | 0.23262 | 0.310097 | 0.693207941 | 17 | 77412787 | 78438332 |
| cheese-intake | PS | -0.258674 | -0.67483 | 0.10058 | 0.0669121 | 0 | 0.45644 | 0.157632 | 0.56698911 | 17 | 78438333 | 79333774 |
| cheese-intake | PS | 0.0102346 | -0.35704 | 0.39701 | 0.000104748 | 0 | 0.19549 | 0.953653 | 0.988457854 | 17 | 79333775 | 80459149 |
| cheese-intake | PS | -0.20647 | -1 | 0.41709 | 0.04263 | 0 | 1 | 0.469878 | 0.797472807 | 18 | 1940212 | 2839842 |
| cheese-intake | PS | 0.0307969 | -0.41829 | 0.48545 | 0.000948446 | 0 | 0.28475 | 0.881883 | 0.965761891 | 18 | 2839843 | 3722828 |
| cheese-intake | PS | 0.471925 | -0.21582 | 1 | 0.222713 | 0 | 1 | 0.15461 | 0.562312094 | 18 | 3722829 | 4603961 |
| cheese-intake | PS | 0.05523 | -0.48097 | 0.61184 | 0.00305035 | 0 | 0.45567 | 0.812851 | 0.944536263 | 18 | 4603962 | 5575812 |
| cheese-intake | PS | -0.261262 | -0.97621 | 0.29604 | 0.0682577 | 0 | 0.96781 | 0.322084 | 0.702517036 | 18 | 5575813 | 6756496 |
| cheese-intake | PS | 0.163829 | -0.45746 | 1 | 0.02684 | 0 | 1 | 0.561323 | 0.845152343 | 18 | 8788525 | 9816164 |
| cheese-intake | PS | 0.255596 | -0.15902 | 0.73606 | 0.0653294 | 0 | 0.54179 | 0.214138 | 0.610690702 | 18 | 9816165 | 10675548 |
| cheese-intake | PS | 0.298916 | -0.01861 | 0.64282 | 0.0893507 | 0 | 0.41322 | 0.0574315 | 0.402513474 | 18 | 12735559 | 13641479 |
| cheese-intake | PS | -0.121815 | -0.95241 | 0.52636 | 0.0148388 | 0 | 0.98187 | 0.671333 | 0.896391487 | 18 | 15220935 | 20009696 |
| cheese-intake | PS | -0.779114 | -1 | -0.37828 | 0.607018 | 0.14309 | 1 | 0.00032984 | 0.061704719 | 18 | 20009697 | 21622716 |
| cheese-intake | PS | -0.290305 | -1 | 0.30134 | 0.0842768 | 0 | 1 | 0.30089 | 0.685716615 | 18 | 21622717 | 22746153 |
| cheese-intake | PS | -0.519083 | -1 | 0.0017 | 0.269447 | 0 | 1 | 0.0547517 | 0.390434612 | 18 | 24088164 | 25305260 |
| cheese-intake | PS | -0.142967 | -0.82098 | 0.41653 | 0.0204394 | 0 | 0.72262 | 0.571999 | 0.849947167 | 18 | 25305261 | 26861067 |
| cheese-intake | PS | 0.326073 | -0.26602 | 1 | 0.106324 | 0 | 1 | 0.253279 | 0.640696318 | 18 | 26861068 | 27823155 |
| cheese-intake | PS | -0.818556 | -1 | -0.41273 | 0.670034 | 0.17034 | 1 | 0.000266458 | 0.05598169 | 18 | 27823156 | 28792734 |
| cheese-intake | PS | -0.0654034 | -0.64193 | 0.48518 | 0.0042776 | 0 | 0.52002 | 0.78676 | 0.933152665 | 18 | 32458908 | 34153297 |
| cheese-intake | PS | 0.108679 | -0.54618 | 0.84242 | 0.0118112 | 0 | 0.81047 | 0.699499 | 0.903972224 | 18 | 34153298 | 36056932 |
| cheese-intake | PS | 0.161736 | -0.45612 | 0.91216 | 0.0261586 | 0 | 0.87372 | 0.56288 | 0.8452408 | 18 | 37679128 | 38498381 |
| cheese-intake | PS | 0.1925 | -0.31439 | 0.81601 | 0.0370563 | 0 | 0.69027 | 0.419196 | 0.767893591 | 18 | 40471408 | 41425454 |
| cheese-intake | PS | -0.0852524 | -0.6616 | 0.43681 | 0.00726797 | 0 | 0.48603 | 0.722219 | 0.909667279 | 18 | 41425455 | 42974165 |
| cheese-intake | PS | 0.318353 | -0.15465 | 0.94512 | 0.101349 | 0 | 0.89487 | 0.18151 | 0.586284077 | 18 | 42974166 | 44300145 |
| cheese-intake | PS | 0.197548 | -0.22283 | 0.67524 | 0.0390253 | 0 | 0.45866 | 0.34141 | 0.716609936 | 18 | 44300146 | 45718492 |
| cheese-intake | PS | 0.118658 | -0.22138 | 0.47571 | 0.0140797 | 0 | 0.22949 | 0.483738 | 0.803210186 | 18 | 45718493 | 46558306 |
| cheese-intake | PS | 0.165267 | -0.22719 | 0.57951 | 0.0273133 | 0 | 0.33741 | 0.396639 | 0.756176066 | 18 | 47455926 | 48228379 |
| cheese-intake | PS | -0.307624 | -1 | 0.258 | 0.0946323 | 0 | 1 | 0.254951 | 0.642492258 | 18 | 48228380 | 49790996 |
| cheese-intake | PS | -0.10146 | -0.96064 | 0.59611 | 0.0102942 | 0 | 1 | 0.731677 | 0.915577426 | 18 | 51060987 | 52512523 |
| cheese-intake | PS | -0.197784 | -0.53709 | 0.1175 | 0.0391185 | 0 | 0.28847 | 0.214284 | 0.610690702 | 18 | 52512524 | 53762996 |
| cheese-intake | PS | 0.45661 | 0.02171 | 1 | 0.208493 | 0.00345 | 1 | 0.0447973 | 0.363950203 | 18 | 53762997 | 54957867 |
| cheese-intake | PS | 0.269626 | -0.40748 | 1 | 0.0726984 | 0 | 1 | 0.39511 | 0.755963245 | 18 | 56832313 | 57635821 |
| cheese-intake | PS | -0.31409 | -0.92849 | 0.15744 | 0.0986527 | 0 | 0.8621 | 0.172459 | 0.582296617 | 18 | 57635822 | 58527236 |
| cheese-intake | PS | -0.264382 | -0.67169 | 0.09493 | 0.0698977 | 0 | 0.45116 | 0.136488 | 0.540048903 | 18 | 58527237 | 59449422 |
| cheese-intake | PS | -0.303963 | -0.93624 | 0.16367 | 0.0923934 | 0 | 0.8846 | 0.196126 | 0.600448596 | 18 | 59449423 | 60780194 |
| cheese-intake | PS | -0.00323828 | -0.44003 | 0.42697 | 0.0000105 | 0 | 0.24999 | 0.98716 | 0.998059082 | 18 | 60780195 | 62074993 |
| cheese-intake | PS | 0.117515 | -0.95088 | 1 | 0.0138098 | 0 | 1 | 0.767185 | 0.928727895 | 18 | 63109756 | 64253143 |
| cheese-intake | PS | 0.209546 | -0.54567 | 1 | 0.0439093 | 0 | 1 | 0.519691 | 0.822603387 | 18 | 64253144 | 65294195 |
| cheese-intake | PS | -0.343023 | -1 | 0.20656 | 0.117665 | 0 | 1 | 0.20406 | 0.603878667 | 18 | 69311743 | 70540349 |
| cheese-intake | PS | 0.0339453 | -0.47938 | 0.57239 | 0.00115229 | 0 | 0.40635 | 0.880582 | 0.965761891 | 18 | 70540350 | 71491860 |
| cheese-intake | PS | 0.0478799 | -0.52381 | 0.66987 | 0.00229249 | 0 | 0.52591 | 0.850949 | 0.955373322 | 18 | 71491861 | 72785206 |
| cheese-intake | PS | -0.228615 | -0.80947 | 0.24167 | 0.0522649 | 0 | 0.66064 | 0.311954 | 0.695455129 | 18 | 74471746 | 75240760 |
| cheese-intake | PS | -0.012362 | -0.66464 | 0.61924 | 0.00015282 | 0 | 0.61409 | 0.963393 | 0.991317435 | 18 | 76231686 | 77148137 |
| cheese-intake | PS | -0.512726 | -1 | 0.00212 | 0.262888 | 0 | 1 | 0.0495642 | 0.374898999 | 18 | 77148138 | 78017072 |
| cheese-intake | PS | 0.133603 | -0.32038 | 0.63042 | 0.0178498 | 0 | 0.40753 | 0.542616 | 0.838940829 | 19 | 64705 | 762046 |
| cheese-intake | PS | -0.194891 | -0.72671 | 0.23258 | 0.0379825 | 0 | 0.53368 | 0.331143 | 0.710120183 | 19 | 762047 | 1515920 |
| cheese-intake | PS | -0.270236 | -0.61805 | 0.04369 | 0.0730277 | 0 | 0.38199 | 0.0919625 | 0.479791573 | 19 | 1515921 | 2253174 |
| cheese-intake | PS | 0.383128 | 0.05416 | 0.80779 | 0.146787 | 0.0044 | 0.65252 | 0.0243573 | 0.303629549 | 19 | 2253175 | 3085446 |
| cheese-intake | PS | 0.22875 | -0.13582 | 0.6897 | 0.0523267 | 0 | 0.47684 | 0.198367 | 0.602861066 | 19 | 3085447 | 3893909 |
| cheese-intake | PS | 0.00635743 | -0.25901 | 0.27706 | 0.0000404 | 0 | 0.09519 | 0.961344 | 0.991317435 | 19 | 3893910 | 4741718 |
| cheese-intake | PS | -0.355703 | -1 | 0.2391 | 0.126525 | 0 | 1 | 0.210619 | 0.608744827 | 19 | 4741719 | 5478684 |
| cheese-intake | PS | 0.305252 | -0.23318 | 1 | 0.0931789 | 0 | 1 | 0.23266 | 0.622842262 | 19 | 6455429 | 7249359 |
| cheese-intake | PS | -0.215796 | -1 | 0.53434 | 0.0465678 | 0 | 1 | 0.513965 | 0.822603387 | 19 | 8199017 | 9105577 |
| cheese-intake | PS | 0.194469 | -0.14762 | 0.61145 | 0.0378183 | 0 | 0.37387 | 0.248821 | 0.637715318 | 19 | 10028841 | 11681978 |
| cheese-intake | PS | 0.0337296 | -0.41753 | 0.49348 | 0.00113769 | 0 | 0.29943 | 0.870912 | 0.960467529 | 19 | 14891101 | 15650185 |
| cheese-intake | PS | 0.431047 | -0.15237 | 1 | 0.185801 | 0 | 1 | 0.133397 | 0.538438962 | 19 | 16079007 | 17045963 |
| cheese-intake | PS | 0.0868012 | -0.63878 | 0.87749 | 0.00753445 | 0 | 0.95605 | 0.773226 | 0.92959111 | 19 | 17045964 | 17750518 |
| cheese-intake | PS | -0.242596 | -0.90764 | 0.20474 | 0.058853 | 0 | 0.83138 | 0.270583 | 0.654942995 | 19 | 17750519 | 18504867 |
| cheese-intake | PS | 0.1051 | -0.66081 | 0.96934 | 0.011046 | 0 | 1 | 0.741333 | 0.920037908 | 19 | 21822654 | 22729408 |
| cheese-intake | PS | 0.321854 | -0.25799 | 1 | 0.10359 | 0 | 1 | 0.24514 | 0.635923145 | 19 | 29389091 | 30375792 |
| cheese-intake | PS | 0.0653831 | -0.53192 | 0.72917 | 0.00427495 | 0 | 0.6225 | 0.796292 | 0.940138903 | 19 | 30375793 | 31763008 |
| cheese-intake | PS | -0.0199562 | -0.38393 | 0.35334 | 0.000398251 | 0 | 0.18567 | 0.909059 | 0.976382568 | 19 | 31763009 | 33028099 |
| cheese-intake | PS | -0.32983 | -0.91608 | 0.10478 | 0.108788 | 0 | 0.83921 | 0.130609 | 0.535218311 | 19 | 33785836 | 34633274 |
| cheese-intake | PS | 0.111724 | -0.35799 | 0.60211 | 0.0124823 | 0 | 0.3825 | 0.607213 | 0.861119261 | 19 | 34633275 | 35649343 |
| cheese-intake | PS | 0.254386 | -0.09798 | 0.66809 | 0.0647122 | 0 | 0.44634 | 0.161834 | 0.574093371 | 19 | 35649344 | 36638122 |
| cheese-intake | PS | -0.122147 | -1 | 0.63251 | 0.0149198 | 0 | 1 | 0.702927 | 0.903972224 | 19 | 38472871 | 39370419 |
| cheese-intake | PS | -0.297247 | -0.7872 | 0.11865 | 0.0883556 | 0 | 0.61969 | 0.151328 | 0.554077632 | 19 | 39370420 | 40171413 |
| cheese-intake | PS | -0.200621 | -0.73833 | 0.24712 | 0.0402487 | 0 | 0.55024 | 0.360459 | 0.73602576 | 19 | 40171414 | 41004105 |
| cheese-intake | PS | -0.146825 | -0.93086 | 0.47263 | 0.0215576 | 0 | 0.95904 | 0.592421 | 0.855748335 | 19 | 41004106 | 41733463 |
| cheese-intake | PS | -0.108463 | -0.4795 | 0.22902 | 0.0117643 | 0 | 0.23216 | 0.516869 | 0.822603387 | 19 | 45040933 | 45893307 |
| cheese-intake | PS | -0.194081 | -0.5689 | 0.14766 | 0.0376675 | 0 | 0.32535 | 0.266108 | 0.651484007 | 19 | 45893308 | 46765060 |
| cheese-intake | PS | 0.343429 | -0.11506 | 0.98192 | 0.117943 | 0 | 0.96522 | 0.132541 | 0.538133195 | 19 | 46765061 | 47752727 |
| cheese-intake | PS | 0.204639 | -0.34232 | 0.88393 | 0.0418771 | 0 | 0.78808 | 0.429246 | 0.772599009 | 19 | 47752728 | 48573065 |
| cheese-intake | PS | 0.0124514 | -0.34239 | 0.36511 | 0.000155038 | 0 | 0.16935 | 0.941899 | 0.986169747 | 19 | 48573066 | 49415189 |
| cheese-intake | PS | 0.412982 | -0.03228 | 1 | 0.170554 | 0 | 1 | 0.0650586 | 0.423269696 | 19 | 49415190 | 50451925 |
| cheese-intake | PS | -0.262988 | -0.6197 | 0.06391 | 0.0691625 | 0 | 0.38403 | 0.106927 | 0.504658355 | 19 | 51259179 | 51903804 |
| cheese-intake | PS | -0.327231 | -0.88766 | 0.08504 | 0.10708 | 0 | 0.78794 | 0.118755 | 0.518850788 | 19 | 52678749 | 53431217 |
| cheese-intake | PS | 0.452815 | 0.1531 | 0.81066 | 0.205041 | 0.02344 | 0.65718 | 0.00503428 | 0.192027888 | 19 | 53431218 | 54042240 |
| cheese-intake | PS | 0.0102921 | -0.34406 | 0.3672 | 0.000105927 | 0 | 0.17109 | 0.952038 | 0.988457854 | 19 | 54042241 | 54602370 |
| cheese-intake | PS | 0.138345 | -0.31961 | 0.64654 | 0.0191393 | 0 | 0.42968 | 0.528693 | 0.828158915 | 19 | 54602371 | 55182973 |
| cheese-intake | PS | 0.0209269 | -0.32929 | 0.37354 | 0.000437934 | 0 | 0.16487 | 0.901857 | 0.973080262 | 19 | 55182974 | 55714085 |
| cheese-intake | PS | -0.258273 | -0.54128 | 0.01338 | 0.0667051 | 0 | 0.29298 | 0.0639283 | 0.419256682 | 19 | 55714086 | 56411086 |
| cheese-intake | PS | -0.33078 | -1 | 0.39118 | 0.109415 | 0 | 1 | 0.323572 | 0.703585987 | 19 | 56411087 | 57143509 |
| cheese-intake | PS | 0.0955987 | -0.71023 | 1 | 0.00913912 | 0 | 1 | 0.771929 | 0.92959111 | 19 | 57959953 | 59118811 |
| cheese-intake | PS | 0.559888 | -0.10097 | 1 | 0.313475 | 0 | 1 | 0.087593 | 0.474425768 | 20 | 60795 | 884241 |
| cheese-intake | PS | 0.269469 | -0.39764 | 1 | 0.0726134 | 0 | 1 | 0.370639 | 0.743772391 | 20 | 2668109 | 3736551 |
| cheese-intake | PS | 0.22437 | -0.16518 | 0.67892 | 0.0503417 | 0 | 0.46115 | 0.257687 | 0.643621228 | 20 | 3736552 | 4591847 |
| cheese-intake | PS | -0.218863 | -0.89217 | 0.33177 | 0.0479011 | 0 | 0.81893 | 0.39211 | 0.754486297 | 20 | 5379451 | 6128358 |
| cheese-intake | PS | 0.0485863 | -0.69607 | 0.84712 | 0.00236062 | 0 | 0.93454 | 0.874201 | 0.962309464 | 20 | 7231797 | 7959828 |
| cheese-intake | PS | -0.0164952 | -1 | 1 | 0.000272091 | 0 | 1 | 0.967633 | 0.992684493 | 20 | 9279551 | 10279603 |
| cheese-intake | PS | 0.162378 | -0.40756 | 0.83295 | 0.0263666 | 0 | 0.71829 | 0.536092 | 0.833763143 | 20 | 10279604 | 11257012 |
| cheese-intake | PS | -0.0909849 | -0.69824 | 0.44173 | 0.00827825 | 0 | 0.54674 | 0.698538 | 0.903972224 | 20 | 12353962 | 13202335 |
| cheese-intake | PS | 0.0734329 | -0.69803 | 0.93652 | 0.0053924 | 0 | 1 | 0.81599 | 0.944542385 | 20 | 13202336 | 14203755 |
| cheese-intake | PS | -0.0221143 | -0.47883 | 0.41723 | 0.000489044 | 0 | 0.27075 | 0.913941 | 0.977166335 | 20 | 15238520 | 15962576 |
| cheese-intake | PS | -0.246215 | -1 | 0.37305 | 0.0606217 | 0 | 1 | 0.389554 | 0.754287344 | 20 | 17359291 | 18058524 |
| cheese-intake | PS | -0.162147 | -0.69301 | 0.30323 | 0.0262915 | 0 | 0.48597 | 0.467245 | 0.797004519 | 20 | 18959420 | 19957928 |
| cheese-intake | PS | -0.810756 | -1 | -0.12052 | 0.657325 | 0.01924 | 1 | 0.0301962 | 0.318452682 | 20 | 23808563 | 24487128 |
| cheese-intake | PS | 0.556871 | -0.25997 | 1 | 0.310105 | 0 | 1 | 0.171925 | 0.582296617 | 20 | 26318859 | 30569659 |
| cheese-intake | PS | -0.208319 | -0.48662 | 0.06777 | 0.0433966 | 0 | 0.2368 | 0.129947 | 0.534632683 | 20 | 30569660 | 32484506 |
| cheese-intake | PS | -0.284631 | -0.6962 | 0.07107 | 0.081015 | 0 | 0.48469 | 0.118794 | 0.518850788 | 20 | 33890061 | 35990261 |
| cheese-intake | PS | 0.437955 | -0.30664 | 1 | 0.191804 | 0 | 1 | 0.21199 | 0.609154919 | 20 | 37253658 | 38427594 |
| cheese-intake | PS | 0.235189 | -0.1245 | 0.64779 | 0.0553137 | 0 | 0.42087 | 0.20004 | 0.602877424 | 20 | 38427595 | 40272390 |
| cheese-intake | PS | 0.564796 | 0.20502 | 1 | 0.318994 | 0.04203 | 1 | 0.00356634 | 0.173845768 | 20 | 40272391 | 41351514 |
| cheese-intake | PS | -0.0101459 | -0.30045 | 0.27985 | 0.000102939 | 0 | 0.11215 | 0.94331 | 0.986589264 | 20 | 41351515 | 42185671 |
| cheese-intake | PS | -0.526869 | -1 | -0.10023 | 0.277591 | 0.01209 | 1 | 0.0174588 | 0.283368889 | 20 | 43008891 | 44072210 |
| cheese-intake | PS | 0.0718683 | -0.50756 | 0.72157 | 0.00516506 | 0 | 0.665 | 0.779242 | 0.930897141 | 20 | 44072211 | 45673603 |
| cheese-intake | PS | -0.334835 | -0.92868 | 0.13797 | 0.112115 | 0 | 0.86246 | 0.148736 | 0.55216732 | 20 | 45673604 | 46486132 |
| cheese-intake | PS | -0.196992 | -0.62478 | 0.19141 | 0.038806 | 0 | 0.39105 | 0.315493 | 0.695891758 | 20 | 46486133 | 47203836 |
| cheese-intake | PS | -0.225632 | -0.61286 | 0.13591 | 0.05091 | 0 | 0.37604 | 0.212587 | 0.609577824 | 20 | 47203837 | 48212975 |
| cheese-intake | PS | -0.120259 | -0.51402 | 0.23703 | 0.0144622 | 0 | 0.26739 | 0.491557 | 0.808809681 | 20 | 48212976 | 49236418 |
| cheese-intake | PS | 0.282184 | -0.15254 | 0.82601 | 0.0796278 | 0 | 0.6823 | 0.190779 | 0.596557161 | 20 | 49236419 | 50653620 |
| cheese-intake | PS | -0.133557 | -0.67812 | 0.33232 | 0.0178375 | 0 | 0.4707 | 0.548842 | 0.843473948 | 20 | 50653621 | 51533750 |
| cheese-intake | PS | -0.31776 | -1 | 0.24438 | 0.100972 | 0 | 1 | 0.227621 | 0.620938095 | 20 | 51533751 | 52411532 |
| cheese-intake | PS | -0.166486 | -0.5478 | 0.18277 | 0.0277177 | 0 | 0.30092 | 0.334169 | 0.713246439 | 20 | 52411533 | 53120334 |
| cheese-intake | PS | -0.0767385 | -0.8085 | 0.57312 | 0.0058888 | 0 | 0.75751 | 0.785007 | 0.933113527 | 20 | 53879804 | 54743694 |
| cheese-intake | PS | 0.163733 | -0.68046 | 1 | 0.0268086 | 0 | 1 | 0.626268 | 0.868930667 | 20 | 54743695 | 55448075 |
| cheese-intake | PS | 0.0313962 | -0.68999 | 0.75512 | 0.00098572 | 0 | 0.86868 | 0.911613 | 0.977166335 | 20 | 56172844 | 56951773 |
| cheese-intake | PS | 0.053032 | -0.58452 | 0.75267 | 0.00281239 | 0 | 0.77317 | 0.84426 | 0.951069107 | 20 | 56951774 | 57924037 |
| cheese-intake | PS | 0.148741 | -0.4058 | 0.80227 | 0.0221238 | 0 | 0.6748 | 0.552903 | 0.84382299 | 20 | 57924038 | 58780894 |
| cheese-intake | PS | -0.643735 | -1 | -0.22051 | 0.414394 | 0.04863 | 1 | 0.00412957 | 0.178799682 | 20 | 58780895 | 59560457 |
| cheese-intake | PS | 0.385538 | -0.00703 | 0.8772 | 0.14864 | 0 | 0.76947 | 0.0595226 | 0.406350706 | 20 | 60766558 | 61470768 |
| cheese-intake | PS | -0.42609 | -0.88405 | -0.05185 | 0.181553 | 0.00498 | 0.78155 | 0.0247731 | 0.305316772 | 20 | 61470769 | 62179241 |
| cheese-intake | PS | -0.138002 | -0.61974 | 0.27984 | 0.0190446 | 0 | 0.38926 | 0.501995 | 0.814819138 | 20 | 62179242 | 62963627 |
| cheese-intake | PS | 0.146295 | -0.58494 | 1 | 0.0214023 | 0 | 1 | 0.645104 | 0.879711759 | 21 | 15840034 | 16873443 |
| cheese-intake | PS | -0.408844 | -0.9643 | -0.00304 | 0.167154 | 0.002 | 0.92988 | 0.0519506 | 0.37957642 | 21 | 16873444 | 18222037 |
| cheese-intake | PS | 0.599517 | 0.09525 | 1 | 0.35942 | 0.0127 | 1 | 0.0207975 | 0.292402657 | 21 | 21632917 | 22201890 |
| cheese-intake | PS | 0.290586 | -0.27563 | 1 | 0.0844402 | 0 | 1 | 0.284647 | 0.670264673 | 21 | 24055942 | 25247986 |
| cheese-intake | PS | 0.230969 | -0.39583 | 1 | 0.0533468 | 0 | 1 | 0.419344 | 0.767893591 | 21 | 25247987 | 26467826 |
| cheese-intake | PS | 0.138982 | -0.70856 | 1 | 0.0193161 | 0 | 1 | 0.68828 | 0.900892552 | 21 | 26467827 | 27774350 |
| cheese-intake | PS | -0.160869 | -0.76598 | 0.35197 | 0.025879 | 0 | 0.60308 | 0.511572 | 0.822603387 | 21 | 32202240 | 33270272 |
| cheese-intake | PS | -0.336132 | -0.96707 | 0.13054 | 0.112985 | 0 | 0.94058 | 0.15042 | 0.552611609 | 21 | 33270273 | 34383794 |
| cheese-intake | PS | 0.101105 | -0.33863 | 0.58932 | 0.0102223 | 0 | 0.36119 | 0.634489 | 0.87289009 | 21 | 34383795 | 35729261 |
| cheese-intake | PS | -0.0999554 | -0.78512 | 0.52995 | 0.00999107 | 0 | 0.69518 | 0.711524 | 0.906057359 | 21 | 35729262 | 37303548 |
| cheese-intake | PS | 0.221368 | -0.67028 | 1 | 0.0490038 | 0 | 1 | 0.552455 | 0.84382299 | 21 | 37303549 | 38046449 |
| cheese-intake | PS | -0.337272 | -1 | 0.15175 | 0.113753 | 0 | 1 | 0.173894 | 0.582296617 | 21 | 39252060 | 40480831 |
| cheese-intake | PS | 0.391223 | -0.35547 | 1 | 0.153055 | 0 | 1 | 0.263557 | 0.648292399 | 21 | 40480832 | 41344742 |
| cheese-intake | PS | -0.397651 | -0.78326 | -0.08011 | 0.158127 | 0.00728 | 0.6135 | 0.0168866 | 0.282828901 | 21 | 42187153 | 43081434 |
| cheese-intake | PS | -0.455896 | -1 | 0.21021 | 0.207841 | 0 | 1 | 0.161082 | 0.574093371 | 21 | 43081435 | 43812791 |
| cheese-intake | PS | 0.247581 | -0.17443 | 0.74588 | 0.0612963 | 0 | 0.55775 | 0.229266 | 0.620938095 | 21 | 44815009 | 46045433 |
| cheese-intake | PS | 0.434578 | -0.3614 | 1 | 0.188858 | 0 | 1 | 0.244021 | 0.635037917 | 21 | 47014881 | 48119633 |
| cheese-intake | PS | 0.247569 | -0.37837 | 1 | 0.0612904 | 0 | 1 | 0.399576 | 0.759171155 | 22 | 16050213 | 17587474 |
| cheese-intake | PS | 0.283572 | -0.0907 | 0.71706 | 0.0804132 | 0 | 0.51456 | 0.129341 | 0.534632683 | 22 | 17587475 | 18535225 |
| cheese-intake | PS | 0.242671 | -0.14965 | 0.68349 | 0.0588891 | 0 | 0.46716 | 0.212253 | 0.609154919 | 22 | 18535226 | 19635654 |
| cheese-intake | PS | -0.380525 | -1 | 0.03362 | 0.1448 | 0 | 1 | 0.0697792 | 0.439581033 | 22 | 19635655 | 20969184 |
| cheese-intake | PS | 0.363298 | 0.00678 | 0.78195 | 0.131986 | 0.00228 | 0.61145 | 0.0464983 | 0.366783605 | 22 | 23143365 | 23950732 |
| cheese-intake | PS | -0.648196 | -1 | 0.11595 | 0.420158 | 0 | 1 | 0.0938344 | 0.482879102 | 22 | 23950733 | 25282436 |
| cheese-intake | PS | 0.0138148 | -0.54414 | 0.57919 | 0.00019085 | 0 | 0.49363 | 0.953125 | 0.988457854 | 22 | 25282437 | 26166934 |
| cheese-intake | PS | -0.30712 | -0.80356 | 0.09952 | 0.0943228 | 0 | 0.6457 | 0.142093 | 0.544689833 | 22 | 26166935 | 27192923 |
| cheese-intake | PS | 0.00595746 | -0.68516 | 0.70111 | 0.0000355 | 0 | 0.74275 | 0.98287 | 0.996292185 | 22 | 27192924 | 27952441 |
| cheese-intake | PS | 0.312988 | -0.35693 | 1 | 0.0979614 | 0 | 1 | 0.299353 | 0.68465469 | 22 | 32662294 | 33501725 |
| cheese-intake | PS | 0.1059 | -0.38596 | 0.64006 | 0.0112147 | 0 | 0.43043 | 0.651181 | 0.884471335 | 22 | 35368342 | 36135968 |
| cheese-intake | PS | 0.422297 | 0.02576 | 0.942 | 0.178334 | 0.00263 | 0.88736 | 0.0405088 | 0.356608466 | 22 | 36135969 | 37364004 |
| cheese-intake | PS | 0.154811 | -0.20593 | 0.54137 | 0.0239664 | 0 | 0.29567 | 0.377177 | 0.744326334 | 22 | 37364005 | 38718589 |
| cheese-intake | PS | 0.486899 | -0.24145 | 1 | 0.237071 | 0 | 1 | 0.165263 | 0.577743536 | 22 | 38718590 | 40378783 |
| cheese-intake | PS | 0.0837048 | -0.42458 | 0.58618 | 0.00700649 | 0 | 0.37797 | 0.70707 | 0.905249165 | 22 | 42867928 | 43574017 |
| cheese-intake | PS | -0.23976 | -0.63522 | 0.11133 | 0.0574851 | 0 | 0.40351 | 0.170845 | 0.582296617 | 22 | 44409534 | 45170649 |
| cheese-intake | PS | -0.399764 | -1 | 0.26204 | 0.159812 | 0 | 1 | 0.205725 | 0.603996364 | 22 | 47299626 | 48269177 |
| cheese-intake | PS | -0.151906 | -0.87717 | 0.39962 | 0.0230755 | 0 | 0.83184 | 0.552748 | 0.84382299 | 22 | 48269178 | 48977538 |
| cheese-intake | PS | 0.247119 | -0.39019 | 1 | 0.0610679 | 0 | 1 | 0.407567 | 0.765888275 | 22 | 49559208 | 50347996 |

| **Supplementary Table 3.The result of local genetic correlation analysis(psoriasis vs dried fruit intake)** | | | | | | | | | | | | |
| --- | --- | --- | --- | --- | --- | --- | --- | --- | --- | --- | --- | --- |
| phen1 | phen2 | log2FoldChange | rho.lower | rho.upper | r2 | r2.lower | r2.upper | p | padj | CHR | START | STOP |
| dried-fruit-intake | PS | 0.177067 | -0.26199 | 0.677 | 0.0313528 | 0 | 0.46601 | 0.403282 | 0.76222165 | 1 | 10539 | 1376204 |
| dried-fruit-intake | PS | 0.0039175 | -0.83137 | 0.77247 | 0.0000153 | 0 | 1 | 0.989965 | 0.998310357 | 1 | 1376205 | 2215495 |
| dried-fruit-intake | PS | -0.15724 | -0.55553 | 0.2022 | 0.0247243 | 0 | 0.30902 | 0.375377 | 0.744326334 | 1 | 2983520 | 3582047 |
| dried-fruit-intake | PS | 0.118559 | -0.39017 | 0.67412 | 0.0140563 | 0 | 0.47238 | 0.615655 | 0.863715305 | 1 | 3582048 | 4281476 |
| dried-fruit-intake | PS | -0.0217221 | -0.48682 | 0.44226 | 0.000471849 | 0 | 0.29813 | 0.917874 | 0.977166335 | 1 | 4773404 | 5362404 |
| dried-fruit-intake | PS | -0.423306 | -1 | 0.2597 | 0.179188 | 0 | 1 | 0.200738 | 0.602877424 | 1 | 6136815 | 7711794 |
| dried-fruit-intake | PS | 0.1552 | -0.28864 | 0.6593 | 0.0240869 | 0 | 0.44642 | 0.463146 | 0.794034035 | 1 | 8580988 | 9475966 |
| dried-fruit-intake | PS | 0.361234 | -0.02741 | 0.85595 | 0.13049 | 0 | 0.73265 | 0.071038 | 0.442754512 | 1 | 10753428 | 11709173 |
| dried-fruit-intake | PS | -0.0690749 | -0.48636 | 0.30317 | 0.00477135 | 0 | 0.24921 | 0.703028 | 0.903972224 | 1 | 11709174 | 13481025 |
| dried-fruit-intake | PS | 0.00623779 | -0.72473 | 0.70123 | 0.0000389 | 0 | 0.76859 | 0.982467 | 0.996292185 | 1 | 13481026 | 14720131 |
| dried-fruit-intake | PS | -0.272017 | -0.83529 | 0.15235 | 0.0739935 | 0 | 0.70215 | 0.206347 | 0.603996364 | 1 | 17557747 | 18427820 |
| dried-fruit-intake | PS | -0.26244 | -0.63118 | 0.05912 | 0.0688748 | 0 | 0.39839 | 0.113791 | 0.514474053 | 1 | 18427821 | 19238924 |
| dried-fruit-intake | PS | -0.156114 | -0.54036 | 0.20099 | 0.0243715 | 0 | 0.29393 | 0.376701 | 0.744326334 | 1 | 19238925 | 20556202 |
| dried-fruit-intake | PS | 0.529543 | -0.08521 | 1 | 0.280415 | 0 | 1 | 0.0898546 | 0.478016906 | 1 | 20556203 | 21416121 |
| dried-fruit-intake | PS | -0.399426 | -1 | 0.24303 | 0.159541 | 0 | 1 | 0.197747 | 0.601902798 | 1 | 21416122 | 22145629 |
| dried-fruit-intake | PS | -0.304305 | -1 | 0.49648 | 0.0926015 | 0 | 1 | 0.396845 | 0.756176066 | 1 | 25885139 | 27992665 |
| dried-fruit-intake | PS | -0.0986113 | -0.93494 | 0.64789 | 0.0097242 | 0 | 1 | 0.751002 | 0.922735859 | 1 | 27992666 | 29188426 |
| dried-fruit-intake | PS | 0.324702 | -0.02728 | 0.72085 | 0.105431 | 0 | 0.51963 | 0.0686075 | 0.435937928 | 1 | 29188427 | 30405182 |
| dried-fruit-intake | PS | -0.0319615 | -0.61031 | 0.51624 | 0.00102154 | 0 | 0.45496 | 0.89495 | 0.971785522 | 1 | 30405183 | 31639217 |
| dried-fruit-intake | PS | -0.122 | -0.51039 | 0.24658 | 0.0148839 | 0 | 0.26478 | 0.494888 | 0.811042493 | 1 | 31639218 | 33066846 |
| dried-fruit-intake | PS | -0.00461551 | -0.47656 | 0.45788 | 0.0000213 | 0 | 0.29036 | 0.982825 | 0.996292185 | 1 | 33066847 | 34371022 |
| dried-fruit-intake | PS | -0.0782902 | -0.42846 | 0.26022 | 0.00612936 | 0 | 0.18574 | 0.638051 | 0.873870499 | 1 | 34371023 | 35201626 |
| dried-fruit-intake | PS | -0.0696738 | -0.63973 | 0.45547 | 0.00485444 | 0 | 0.46272 | 0.769775 | 0.92959111 | 1 | 36855140 | 38474036 |
| dried-fruit-intake | PS | -0.104203 | -0.602 | 0.33728 | 0.0108583 | 0 | 0.36894 | 0.629222 | 0.870068479 | 1 | 38474037 | 40200950 |
| dried-fruit-intake | PS | 0.291653 | -0.11932 | 0.76869 | 0.0850617 | 0 | 0.59088 | 0.161548 | 0.574093371 | 1 | 40200951 | 41093875 |
| dried-fruit-intake | PS | -0.419115 | -1 | 0.03749 | 0.175658 | 0 | 1 | 0.0783824 | 0.457283004 | 1 | 41093876 | 41977966 |
| dried-fruit-intake | PS | -0.273635 | -0.69662 | 0.08066 | 0.0748762 | 0 | 0.48528 | 0.136527 | 0.540048903 | 1 | 41977967 | 43512669 |
| dried-fruit-intake | PS | -0.154687 | -0.72442 | 0.32559 | 0.0239281 | 0 | 0.536 | 0.507803 | 0.821845688 | 1 | 43512670 | 45167235 |
| dried-fruit-intake | PS | 0.751198 | 0.09736 | 1 | 0.564299 | 0.01834 | 1 | 0.0270939 | 0.305371 | 1 | 48105234 | 49185414 |
| dried-fruit-intake | PS | 0.432144 | 0.06357 | 0.90923 | 0.186749 | 0.00596 | 0.8267 | 0.0217074 | 0.294175802 | 1 | 64344227 | 65894184 |
| dried-fruit-intake | PS | -0.129162 | -0.37584 | 0.10839 | 0.0166827 | 0 | 0.14126 | 0.27735 | 0.663439997 | 1 | 66778016 | 67761890 |
| dried-fruit-intake | PS | 0.296937 | -0.09629 | 0.9923 | 0.0881715 | 0 | 0.98466 | 0.130281 | 0.535217291 | 1 | 67761891 | 68633860 |
| dried-fruit-intake | PS | 0.289903 | -0.25698 | 1 | 0.0840435 | 0 | 1 | 0.270861 | 0.654942995 | 1 | 68633861 | 69438909 |
| dried-fruit-intake | PS | -0.303122 | -0.81407 | 0.1231 | 0.0918827 | 0 | 0.66271 | 0.163 | 0.574566392 | 1 | 69438910 | 70992905 |
| dried-fruit-intake | PS | -0.139986 | -0.81294 | 0.43223 | 0.0195961 | 0 | 0.70424 | 0.596788 | 0.856751476 | 1 | 76097248 | 76977915 |
| dried-fruit-intake | PS | -0.306338 | -0.94146 | 0.1718 | 0.0938428 | 0 | 0.88975 | 0.202172 | 0.602877424 | 1 | 76977916 | 77895394 |
| dried-fruit-intake | PS | 0.151351 | -1 | 1 | 0.0229072 | 0 | 1 | 0.721825 | 0.909521779 | 1 | 77895395 | 79065286 |
| dried-fruit-intake | PS | -0.34635 | -1 | 0.16644 | 0.119958 | 0 | 1 | 0.181169 | 0.586284077 | 1 | 80781443 | 82123368 |
| dried-fruit-intake | PS | -0.49124 | -1 | 0.21426 | 0.241317 | 0 | 1 | 0.155593 | 0.563377758 | 1 | 82123369 | 83461215 |
| dried-fruit-intake | PS | -0.244301 | -1 | 0.62342 | 0.0596828 | 0 | 1 | 0.510655 | 0.822603387 | 1 | 84728348 | 86017267 |
| dried-fruit-intake | PS | 0.196962 | -0.30848 | 0.77193 | 0.038794 | 0 | 0.61263 | 0.403258 | 0.76222165 | 1 | 88656690 | 89753964 |
| dried-fruit-intake | PS | 0.53328 | 0.11738 | 1 | 0.284388 | 0.01505 | 1 | 0.0150818 | 0.273599214 | 1 | 89753965 | 90941549 |
| dried-fruit-intake | PS | -0.230174 | -0.93435 | 0.27905 | 0.0529802 | 0 | 0.89766 | 0.33261 | 0.71108814 | 1 | 90941550 | 91870059 |
| dried-fruit-intake | PS | 0.446839 | -0.20597 | 1 | 0.199665 | 0 | 1 | 0.154496 | 0.562312094 | 1 | 95122542 | 96147576 |
| dried-fruit-intake | PS | -0.0473871 | -0.57804 | 0.44748 | 0.00224554 | 0 | 0.39435 | 0.831738 | 0.946695205 | 1 | 96147577 | 97721186 |
| dried-fruit-intake | PS | -0.0395581 | -0.39064 | 0.31279 | 0.00156484 | 0 | 0.17278 | 0.81483 | 0.944542385 | 1 | 97721187 | 99425000 |
| dried-fruit-intake | PS | 0.507795 | -0.45076 | 1 | 0.257856 | 0 | 1 | 0.248535 | 0.637715318 | 1 | 107874654 | 109271449 |
| dried-fruit-intake | PS | -0.0131785 | -0.47394 | 0.43578 | 0.000173673 | 0 | 0.28714 | 0.950149 | 0.988275998 | 1 | 110224231 | 111134062 |
| dried-fruit-intake | PS | -0.16514 | -1 | 0.57801 | 0.0272712 | 0 | 1 | 0.604654 | 0.860368673 | 1 | 112489249 | 113418037 |
| dried-fruit-intake | PS | 0.643792 | 0.0994 | 1 | 0.414469 | 0.01408 | 1 | 0.0238293 | 0.303629549 | 1 | 114664388 | 116207297 |
| dried-fruit-intake | PS | -0.407127 | -0.91488 | -0.02974 | 0.165753 | 0.00277 | 0.83701 | 0.0353308 | 0.342762835 | 1 | 117046312 | 118118667 |
| dried-fruit-intake | PS | -0.21912 | -1 | 0.3705 | 0.0480138 | 0 | 1 | 0.417995 | 0.767893591 | 1 | 120345067 | 145803848 |
| dried-fruit-intake | PS | 0.00902987 | -0.40535 | 0.41314 | 0.0000815 | 0 | 0.22081 | 0.962609 | 0.991317435 | 1 | 151146408 | 152535630 |
| dried-fruit-intake | PS | 0.257502 | -0.08112 | 0.64516 | 0.0663074 | 0 | 0.41656 | 0.133252 | 0.538438962 | 1 | 153410810 | 154685545 |
| dried-fruit-intake | PS | -0.144929 | -0.66687 | 0.30821 | 0.0210045 | 0 | 0.46091 | 0.499874 | 0.813852684 | 1 | 154685546 | 156813845 |
| dried-fruit-intake | PS | -0.064492 | -0.60812 | 0.41258 | 0.00415921 | 0 | 0.41586 | 0.767125 | 0.928727895 | 1 | 156813846 | 158081627 |
| dried-fruit-intake | PS | -0.25064 | -1 | 0.31795 | 0.0628202 | 0 | 1 | 0.351567 | 0.726720141 | 1 | 158900370 | 159882515 |
| dried-fruit-intake | PS | -0.788144 | -1 | -0.22818 | 0.621171 | 0.05319 | 1 | 0.00710962 | 0.205706476 | 1 | 159882516 | 161054076 |
| dried-fruit-intake | PS | 0.00768813 | -0.39823 | 0.41149 | 0.0000591 | 0 | 0.21654 | 0.967289 | 0.992684493 | 1 | 161945443 | 163141862 |
| dried-fruit-intake | PS | 0.1514 | -0.50389 | 0.87339 | 0.0229219 | 0 | 0.82026 | 0.584489 | 0.855475038 | 1 | 163141863 | 163854567 |
| dried-fruit-intake | PS | -0.00532326 | -0.4422 | 0.42448 | 0.0000283 | 0 | 0.25122 | 0.978815 | 0.996292185 | 1 | 165553813 | 166458031 |
| dried-fruit-intake | PS | -0.677191 | -1 | -0.21817 | 0.458587 | 0.04777 | 1 | 0.00609025 | 0.200879756 | 1 | 167163955 | 168179086 |
| dried-fruit-intake | PS | 0.0760422 | -0.75264 | 0.9906 | 0.00578241 | 0 | 1 | 0.814711 | 0.944542385 | 1 | 171044256 | 172465153 |
| dried-fruit-intake | PS | 0.457925 | -0.27571 | 1 | 0.209695 | 0 | 1 | 0.188888 | 0.596557161 | 1 | 176449097 | 177746472 |
| dried-fruit-intake | PS | 0.106912 | -0.6934 | 1 | 0.0114302 | 0 | 1 | 0.742522 | 0.920682176 | 1 | 181324206 | 182420540 |
| dried-fruit-intake | PS | -0.332101 | -1 | 0.6907 | 0.110291 | 0 | 1 | 0.427489 | 0.772599009 | 1 | 188625773 | 189904637 |
| dried-fruit-intake | PS | -0.175539 | -1 | 0.56623 | 0.0308138 | 0 | 1 | 0.585296 | 0.855475038 | 1 | 189904638 | 191419275 |
| dried-fruit-intake | PS | -0.0777986 | -1 | 1 | 0.00605263 | 0 | 1 | 0.848024 | 0.953724841 | 1 | 192468374 | 193575516 |
| dried-fruit-intake | PS | -0.428491 | -1 | 0.17076 | 0.183604 | 0 | 1 | 0.146143 | 0.547994303 | 1 | 195161236 | 196179110 |
| dried-fruit-intake | PS | -0.133046 | -0.52271 | 0.22851 | 0.0177014 | 0 | 0.27457 | 0.462771 | 0.794034035 | 1 | 197935822 | 199263389 |
| dried-fruit-intake | PS | 0.327823 | -0.13684 | 0.91848 | 0.107468 | 0 | 0.8436 | 0.161319 | 0.574093371 | 1 | 200134006 | 201067952 |
| dried-fruit-intake | PS | 0.347044 | -0.15201 | 1 | 0.12044 | 0 | 1 | 0.165562 | 0.577743536 | 1 | 201067953 | 202583884 |
| dried-fruit-intake | PS | 0.0251189 | -0.36157 | 0.41678 | 0.000630957 | 0 | 0.20658 | 0.890525 | 0.970455339 | 1 | 205917549 | 208162951 |
| dried-fruit-intake | PS | -0.408784 | -1 | 0.02385 | 0.167104 | 0 | 1 | 0.0689313 | 0.436297724 | 1 | 208162952 | 209711169 |
| dried-fruit-intake | PS | -0.0909695 | -0.66606 | 0.42556 | 0.00827545 | 0 | 0.48126 | 0.701951 | 0.903972224 | 1 | 212347583 | 213958292 |
| dried-fruit-intake | PS | 0.258302 | -0.48978 | 1 | 0.0667199 | 0 | 1 | 0.431904 | 0.772822169 | 1 | 213958293 | 214783872 |
| dried-fruit-intake | PS | -0.349682 | -1 | 0.17104 | 0.122277 | 0 | 1 | 0.167762 | 0.579300708 | 1 | 215825792 | 216658126 |
| dried-fruit-intake | PS | -0.441303 | -1 | 0.01195 | 0.194749 | 0 | 1 | 0.0569256 | 0.399825827 | 1 | 216658127 | 217352165 |
| dried-fruit-intake | PS | NA | NA | NA | NA | NA | NA | NA | NA | 1 | 231287765 | 232177704 |
| dried-fruit-intake | PS | -0.267681 | -0.86683 | 0.20922 | 0.0716531 | 0 | 0.7514 | 0.255629 | 0.643621228 | 1 | 232177705 | 232954942 |
| dried-fruit-intake | PS | 0.444007 | 0.04508 | 1 | 0.197143 | 0.0045 | 1 | 0.0299404 | 0.318452682 | 1 | 234365797 | 235097113 |
| dried-fruit-intake | PS | 0.216292 | -0.09082 | 0.54244 | 0.0467822 | 0 | 0.29443 | 0.156495 | 0.564405174 | 1 | 235097114 | 236199671 |
| dried-fruit-intake | PS | -0.390997 | -1 | 0.09099 | 0.152878 | 0 | 1 | 0.108338 | 0.507510235 | 1 | 240248509 | 241033584 |
| dried-fruit-intake | PS | 0.380952 | -0.14862 | 1 | 0.145124 | 0 | 1 | 0.143023 | 0.545236775 | 1 | 242417924 | 243048003 |
| dried-fruit-intake | PS | -0.0612963 | -0.84777 | 0.67571 | 0.00375724 | 0 | 0.89524 | 0.836867 | 0.948975213 | 1 | 243048004 | 244723196 |
| dried-fruit-intake | PS | 0.000284623 | -1 | 1 | 0.000000081 | 0 | 1 | 0.999395 | 0.999874 | 1 | 245970506 | 246610290 |
| dried-fruit-intake | PS | -1 | -1 | -0.33658 | 1 | 0.11375 | 1 | 0.00427017 | 0.178799682 | 1 | 248341595 | 249240538 |
| dried-fruit-intake | PS | 0.279129 | -0.37984 | 1 | 0.0779129 | 0 | 1 | 0.363549 | 0.737797514 | 2 | 10181 | 789195 |
| dried-fruit-intake | PS | -0.137097 | -0.55183 | 0.25427 | 0.0187957 | 0 | 0.3057 | 0.468301 | 0.797014625 | 2 | 1875061 | 2680063 |
| dried-fruit-intake | PS | -0.391036 | -1 | 0.21643 | 0.152909 | 0 | 1 | 0.1913 | 0.596557161 | 2 | 2680064 | 3314202 |
| dried-fruit-intake | PS | 0.000915046 | -0.81071 | 0.77883 | 0.000000837 | 0 | 0.98226 | 0.997633 | 0.999256787 | 2 | 3314203 | 4016104 |
| dried-fruit-intake | PS | -0.235258 | -0.87226 | 0.27175 | 0.0553461 | 0 | 0.76469 | 0.339069 | 0.71537426 | 2 | 4016105 | 4766969 |
| dried-fruit-intake | PS | -0.0124787 | -0.63534 | 0.6015 | 0.000155717 | 0 | 0.5912 | 0.960961 | 0.991317435 | 2 | 4766970 | 5568653 |
| dried-fruit-intake | PS | -0.104206 | -0.5638 | 0.31879 | 0.0108589 | 0 | 0.32705 | 0.611004 | 0.86163172 | 2 | 6306607 | 7108208 |
| dried-fruit-intake | PS | -0.188126 | -1 | 0.85609 | 0.0353916 | 0 | 1 | 0.639122 | 0.874109067 | 2 | 9960671 | 10611654 |
| dried-fruit-intake | PS | 0.0504607 | -0.63142 | 0.75454 | 0.00254628 | 0 | 0.78452 | 0.856406 | 0.955614217 | 2 | 17241116 | 18656325 |
| dried-fruit-intake | PS | 0.747735 | 0.18132 | 1 | 0.559107 | 0.03579 | 1 | 0.0130053 | 0.26371942 | 2 | 20064518 | 21084898 |
| dried-fruit-intake | PS | 0.18921 | -0.07385 | 0.45976 | 0.0358006 | 0 | 0.21138 | 0.152283 | 0.556949919 | 2 | 22429641 | 23538527 |
| dried-fruit-intake | PS | -0.210093 | -0.62374 | 0.16576 | 0.0441392 | 0 | 0.39089 | 0.260581 | 0.645985626 | 2 | 23538528 | 24669224 |
| dried-fruit-intake | PS | -0.345917 | -0.97739 | 0.11566 | 0.119659 | 0 | 0.95789 | 0.137147 | 0.540048903 | 2 | 24669225 | 25895394 |
| dried-fruit-intake | PS | 0.0648728 | -0.30349 | 0.43646 | 0.00420848 | 0 | 0.20258 | 0.715446 | 0.906613519 | 2 | 26894103 | 28819510 |
| dried-fruit-intake | PS | -0.0970911 | -0.81397 | 0.52175 | 0.00942668 | 0 | 0.78204 | 0.711062 | 0.906057359 | 2 | 29627933 | 30575619 |
| dried-fruit-intake | PS | 0.170297 | -0.53403 | 1 | 0.0290011 | 0 | 1 | 0.567114 | 0.84703292 | 2 | 33123605 | 33735318 |
| dried-fruit-intake | PS | -0.0853208 | -0.4973 | 0.30262 | 0.00727963 | 0 | 0.26199 | 0.659678 | 0.890660747 | 2 | 49849186 | 50756240 |
| dried-fruit-intake | PS | -1 | -1 | -0.441 | 1 | 0.19448 | 1 | 0.00105795 | 0.119147059 | 2 | 50756241 | 51669493 |
| dried-fruit-intake | PS | -0.525613 | -1 | 0.19344 | 0.276269 | 0 | 1 | 0.139924 | 0.542539552 | 2 | 56394699 | 57433653 |
| dried-fruit-intake | PS | 0.0217181 | -0.37498 | 0.40461 | 0.000471675 | 0 | 0.20758 | 0.905916 | 0.975080055 | 2 | 57952946 | 59251996 |
| dried-fruit-intake | PS | -0.199965 | -0.42791 | 0.02692 | 0.0399859 | 0 | 0.18311 | 0.0812624 | 0.460358212 | 2 | 59251997 | 60775066 |
| dried-fruit-intake | PS | 0.113519 | -0.13273 | 0.37567 | 0.0128866 | 0 | 0.14113 | 0.362681 | 0.736639394 | 2 | 60775067 | 62429910 |
| dried-fruit-intake | PS | -0.0208965 | -0.40859 | 0.35212 | 0.000436665 | 0 | 0.20642 | 0.90642 | 0.975080055 | 2 | 62429911 | 63672118 |
| dried-fruit-intake | PS | -0.194114 | -1 | 0.80682 | 0.0376802 | 0 | 1 | 0.624533 | 0.868930667 | 2 | 63672119 | 64696089 |
| dried-fruit-intake | PS | 0.181613 | -0.13909 | 0.52545 | 0.0329832 | 0 | 0.27629 | 0.261084 | 0.645985626 | 2 | 64696090 | 65938002 |
| dried-fruit-intake | PS | -0.0475732 | -0.41503 | 0.31916 | 0.00226321 | 0 | 0.19191 | 0.78821 | 0.933152665 | 2 | 65938003 | 67224027 |
| dried-fruit-intake | PS | -0.0469082 | -0.64597 | 0.52705 | 0.00220038 | 0 | 0.52724 | 0.852814 | 0.955373322 | 2 | 68877775 | 70756283 |
| dried-fruit-intake | PS | 0.606813 | -0.06495 | 1 | 0.368222 | 0 | 1 | 0.0772444 | 0.457029367 | 2 | 70756284 | 71385813 |
| dried-fruit-intake | PS | -0.205226 | -0.69857 | 0.24207 | 0.0421175 | 0 | 0.48876 | 0.342929 | 0.71676685 | 2 | 71385814 | 72160302 |
| dried-fruit-intake | PS | -0.60799 | -1 | -0.11275 | 0.369652 | 0.01659 | 1 | 0.0181803 | 0.284099808 | 2 | 73544291 | 75148103 |
| dried-fruit-intake | PS | 0.307037 | -0.24962 | 1 | 0.0942718 | 0 | 1 | 0.262452 | 0.647735304 | 2 | 75148104 | 75942397 |
| dried-fruit-intake | PS | -0.00326957 | -0.8457 | 0.78589 | 0.0000107 | 0 | 1 | 0.99182 | 0.998435708 | 2 | 77372831 | 78080057 |
| dried-fruit-intake | PS | 0.253111 | -0.17246 | 0.75577 | 0.0640653 | 0 | 0.57221 | 0.239418 | 0.629580667 | 2 | 84395900 | 85992794 |
| dried-fruit-intake | PS | -0.210258 | -0.65263 | 0.17552 | 0.0442083 | 0 | 0.42634 | 0.267438 | 0.652317034 | 2 | 100202437 | 101556799 |
| dried-fruit-intake | PS | 0.519879 | -0.01877 | 1 | 0.270274 | 0 | 1 | 0.0615076 | 0.411647175 | 2 | 101556800 | 102494487 |
| dried-fruit-intake | PS | 0.405788 | -0.22925 | 1 | 0.164664 | 0 | 1 | 0.197175 | 0.601462413 | 2 | 102494488 | 103305257 |
| dried-fruit-intake | PS | -0.231779 | -1 | 0.49517 | 0.0537214 | 0 | 1 | 0.477623 | 0.800410688 | 2 | 108417774 | 110097868 |
| dried-fruit-intake | PS | -0.114854 | -0.45584 | 0.20561 | 0.0131914 | 0 | 0.21062 | 0.47794 | 0.800410688 | 2 | 110097869 | 112644828 |
| dried-fruit-intake | PS | -0.277722 | -0.93348 | 0.2442 | 0.0771296 | 0 | 0.87348 | 0.266724 | 0.651484007 | 2 | 113930669 | 115203835 |
| dried-fruit-intake | PS | -0.0530808 | -0.85101 | 0.64879 | 0.00281757 | 0 | 0.96555 | 0.855457 | 0.955614217 | 2 | 118663654 | 119635489 |
| dried-fruit-intake | PS | -0.20398 | -1 | 0.50338 | 0.041608 | 0 | 1 | 0.508901 | 0.822603387 | 2 | 119635490 | 121073752 |
| dried-fruit-intake | PS | -0.415593 | -1 | 0.04531 | 0.172718 | 0 | 1 | 0.0800239 | 0.459328748 | 2 | 121073753 | 122026817 |
| dried-fruit-intake | PS | -0.709602 | -1 | 0.03673 | 0.503535 | 0 | 1 | 0.0656111 | 0.425170342 | 2 | 124730992 | 125741528 |
| dried-fruit-intake | PS | -0.415893 | -1 | 0.24635 | 0.172967 | 0 | 1 | 0.199854 | 0.602877424 | 2 | 126754028 | 127895644 |
| dried-fruit-intake | PS | -0.340903 | -0.91976 | 0.10133 | 0.116215 | 0 | 0.84595 | 0.129975 | 0.534632683 | 2 | 133352951 | 134359059 |
| dried-fruit-intake | PS | 0.553674 | -0.15962 | 1 | 0.306555 | 0 | 1 | 0.116725 | 0.516275157 | 2 | 140934532 | 141802664 |
| dried-fruit-intake | PS | -0.657188 | -1 | 0.12454 | 0.431896 | 0 | 1 | 0.0982735 | 0.484835727 | 2 | 141802665 | 142494980 |
| dried-fruit-intake | PS | 0.248809 | -0.34733 | 0.99257 | 0.061906 | 0 | 1 | 0.369851 | 0.743772391 | 2 | 142494981 | 143259780 |
| dried-fruit-intake | PS | 0.287803 | -0.45741 | 1 | 0.0828308 | 0 | 1 | 0.382089 | 0.749041221 | 2 | 143259781 | 144503688 |
| dried-fruit-intake | PS | 0.24447 | -0.59482 | 1 | 0.0597658 | 0 | 1 | 0.495913 | 0.811042493 | 2 | 144503689 | 145977920 |
| dried-fruit-intake | PS | -0.574718 | -1 | 0.16862 | 0.330301 | 0 | 1 | 0.115915 | 0.516275157 | 2 | 147252197 | 149568875 |
| dried-fruit-intake | PS | -0.138173 | -1 | 0.69236 | 0.0190917 | 0 | 1 | 0.683998 | 0.900136915 | 2 | 151428989 | 152497375 |
| dried-fruit-intake | PS | -0.230147 | -1 | 0.87476 | 0.0529676 | 0 | 1 | 0.584837 | 0.855475038 | 2 | 160200380 | 161432089 |
| dried-fruit-intake | PS | 0.192093 | -0.19513 | 0.64601 | 0.0368996 | 0 | 0.42029 | 0.317947 | 0.697286616 | 2 | 161432090 | 163607635 |
| dried-fruit-intake | PS | 0.1283 | -0.27696 | 0.54232 | 0.0164608 | 0 | 0.30061 | 0.507498 | 0.82175928 | 2 | 163607636 | 164702312 |
| dried-fruit-intake | PS | 0.313567 | -0.21109 | 1 | 0.0983243 | 0 | 1 | 0.223892 | 0.620938095 | 2 | 164702313 | 165917788 |
| dried-fruit-intake | PS | 0.241936 | -0.41205 | 1 | 0.0585332 | 0 | 1 | 0.420966 | 0.76827085 | 2 | 165917789 | 167488576 |
| dried-fruit-intake | PS | 0.739059 | 0.32044 | 1 | 0.546209 | 0.10268 | 1 | 0.000982201 | 0.114566731 | 2 | 170865766 | 171566482 |
| dried-fruit-intake | PS | 0.218255 | -0.3065 | 0.89413 | 0.0476354 | 0 | 0.81559 | 0.386163 | 0.751421205 | 2 | 174927564 | 176734750 |
| dried-fruit-intake | PS | 0.232102 | -0.33146 | 0.94983 | 0.0538713 | 0 | 0.93236 | 0.391288 | 0.754395872 | 2 | 179224871 | 180336045 |
| dried-fruit-intake | PS | -0.490584 | -1 | 0.11048 | 0.240673 | 0 | 1 | 0.104305 | 0.497135592 | 2 | 181309940 | 182307877 |
| dried-fruit-intake | PS | -0.235605 | -0.76786 | 0.21554 | 0.0555098 | 0 | 0.59138 | 0.288762 | 0.675011382 | 2 | 184148656 | 184866232 |
| dried-fruit-intake | PS | -0.0239312 | -0.53394 | 0.48324 | 0.000572701 | 0 | 0.3765 | 0.91612 | 0.977166335 | 2 | 193033983 | 195300250 |
| dried-fruit-intake | PS | -0.0495204 | -0.68719 | 0.55473 | 0.00245227 | 0 | 0.59256 | 0.852301 | 0.955373322 | 2 | 195300251 | 196446299 |
| dried-fruit-intake | PS | -0.414198 | -1 | -0.0007 | 0.17156 | 0.00261 | 1 | 0.0483655 | 0.373431969 | 2 | 196446300 | 198140350 |
| dried-fruit-intake | PS | -0.428874 | -1 | 0.09563 | 0.183933 | 0 | 1 | 0.103389 | 0.496571285 | 2 | 198140351 | 199654969 |
| dried-fruit-intake | PS | 0.0758745 | -0.69478 | 0.87111 | 0.00575694 | 0 | 0.95852 | 0.802304 | 0.941469324 | 2 | 199654970 | 201324132 |
| dried-fruit-intake | PS | -0.557572 | -1 | -0.0321 | 0.310887 | 0.00603 | 1 | 0.0377842 | 0.351281893 | 2 | 205038120 | 206821199 |
| dried-fruit-intake | PS | 0.118355 | -0.25073 | 0.5101 | 0.0140078 | 0 | 0.26615 | 0.519564 | 0.822603387 | 2 | 207726595 | 208674588 |
| dried-fruit-intake | PS | 0.184873 | -0.77673 | 1 | 0.0341778 | 0 | 1 | 0.625396 | 0.868930667 | 2 | 210842458 | 212520453 |
| dried-fruit-intake | PS | 0.643564 | 0.23331 | 1 | 0.414175 | 0.05469 | 1 | 0.0034027 | 0.172744678 | 2 | 213194363 | 214044566 |
| dried-fruit-intake | PS | 0.391707 | -0.09785 | 1 | 0.153434 | 0 | 1 | 0.112935 | 0.512998206 | 2 | 219678784 | 220771552 |
| dried-fruit-intake | PS | 0.136661 | -0.52763 | 0.94231 | 0.0186763 | 0 | 1 | 0.646702 | 0.881155082 | 2 | 220771553 | 221445191 |
| dried-fruit-intake | PS | 0.725615 | 0.12377 | 1 | 0.526517 | 0.01998 | 1 | 0.0225554 | 0.298242657 | 2 | 222327714 | 223353965 |
| dried-fruit-intake | PS | -0.0897142 | -0.59401 | 0.37499 | 0.00804864 | 0 | 0.36834 | 0.684018 | 0.900136915 | 2 | 224938732 | 226242842 |
| dried-fruit-intake | PS | 0.171812 | -0.23419 | 0.65929 | 0.0295193 | 0 | 0.44622 | 0.383308 | 0.750529933 | 2 | 227557842 | 228812485 |
| dried-fruit-intake | PS | -0.21337 | -0.62255 | 0.16361 | 0.0455269 | 0 | 0.38757 | 0.253846 | 0.640696318 | 2 | 230541093 | 231847386 |
| dried-fruit-intake | PS | 0.498652 | -0.18687 | 1 | 0.248653 | 0 | 1 | 0.136977 | 0.540048903 | 2 | 233352723 | 234115092 |
| dried-fruit-intake | PS | -0.306758 | -0.96078 | 0.19836 | 0.0941007 | 0 | 0.92374 | 0.207839 | 0.605532715 | 2 | 234115093 | 234945577 |
| dried-fruit-intake | PS | -0.233731 | -0.74437 | 0.17776 | 0.0546302 | 0 | 0.55649 | 0.258116 | 0.643621228 | 2 | 234945578 | 235625789 |
| dried-fruit-intake | PS | 0.270847 | -0.33788 | 1 | 0.0733579 | 0 | 1 | 0.349443 | 0.725669948 | 2 | 236276288 | 237194297 |
| dried-fruit-intake | PS | -0.210414 | -0.69987 | 0.22874 | 0.0442742 | 0 | 0.4905 | 0.315559 | 0.695891758 | 2 | 238185483 | 238814630 |
| dried-fruit-intake | PS | 0.290867 | -0.23167 | 0.95567 | 0.0846035 | 0 | 0.92457 | 0.250014 | 0.638425116 | 2 | 238814631 | 239634350 |
| dried-fruit-intake | PS | 0.253067 | -0.15967 | 0.72602 | 0.0640429 | 0 | 0.52711 | 0.217719 | 0.615142653 | 2 | 239634351 | 240325600 |
| dried-fruit-intake | PS | 0.412619 | 0.15162 | 0.70689 | 0.170254 | 0.02323 | 0.4997 | 0.00340979 | 0.172744678 | 2 | 240325601 | 241113279 |
| dried-fruit-intake | PS | -0.996274 | -1 | -0.3805 | 0.992561 | 0.1451 | 1 | 0.00247739 | 0.158650113 | 2 | 241113280 | 241910366 |
| dried-fruit-intake | PS | -0.363715 | -0.75762 | -0.03843 | 0.132289 | 0.00328 | 0.57399 | 0.0330796 | 0.33448289 | 2 | 241910367 | 243188366 |
| dried-fruit-intake | PS | 0.0981048 | -0.84557 | 1 | 0.00962454 | 0 | 1 | 0.783387 | 0.932413244 | 3 | 3128153 | 4109393 |
| dried-fruit-intake | PS | -0.213209 | -1 | 0.44334 | 0.045458 | 0 | 1 | 0.473829 | 0.798104958 | 3 | 8664893 | 9970731 |
| dried-fruit-intake | PS | -0.252316 | -0.71294 | 0.14233 | 0.0636635 | 0 | 0.50828 | 0.194799 | 0.599635753 | 3 | 9970732 | 11226367 |
| dried-fruit-intake | PS | -0.1778 | -0.7802 | 0.32061 | 0.0316129 | 0 | 0.61764 | 0.458624 | 0.792521685 | 3 | 11226368 | 11997658 |
| dried-fruit-intake | PS | 0.0373072 | -0.37071 | 0.44012 | 0.00139182 | 0 | 0.22275 | 0.84478 | 0.951069107 | 3 | 11997659 | 12859209 |
| dried-fruit-intake | PS | -0.391084 | -1 | 0.08501 | 0.152947 | 0 | 1 | 0.102309 | 0.496571285 | 3 | 14312008 | 15150876 |
| dried-fruit-intake | PS | 0.288597 | -0.29173 | 1 | 0.0832885 | 0 | 1 | 0.285695 | 0.671571837 | 3 | 16084006 | 17182494 |
| dried-fruit-intake | PS | -0.0629806 | -0.36222 | 0.22337 | 0.00396656 | 0 | 0.1347 | 0.662407 | 0.891843705 | 3 | 17182495 | 19030988 |
| dried-fruit-intake | PS | -0.373703 | -1 | 0.20858 | 0.139654 | 0 | 1 | 0.175788 | 0.582296617 | 3 | 19030989 | 20754842 |
| dried-fruit-intake | PS | -0.550152 | -1 | -0.08101 | 0.302667 | 0.01084 | 1 | 0.0264626 | 0.305371 | 3 | 20754843 | 21790867 |
| dried-fruit-intake | PS | -0.40734 | -0.91182 | -0.02586 | 0.165926 | 0.00291 | 0.83141 | 0.038076 | 0.351288746 | 3 | 24270190 | 25516193 |
| dried-fruit-intake | PS | 0.327245 | -0.09902 | 0.83675 | 0.107089 | 0 | 0.7017 | 0.120495 | 0.518850788 | 3 | 28649811 | 29877022 |
| dried-fruit-intake | PS | -0.163141 | -0.79583 | 0.36661 | 0.0266151 | 0 | 0.64017 | 0.515683 | 0.822603387 | 3 | 31269698 | 32378805 |
| dried-fruit-intake | PS | 0.357426 | -0.26357 | 1 | 0.127753 | 0 | 1 | 0.231732 | 0.622398612 | 3 | 33020869 | 33991869 |
| dried-fruit-intake | PS | 0.0475044 | -0.94354 | 1 | 0.00225667 | 0 | 1 | 0.896082 | 0.971785522 | 3 | 35913034 | 36840136 |
| dried-fruit-intake | PS | 0.325735 | -0.07265 | 0.79659 | 0.106104 | 0 | 0.63559 | 0.0990979 | 0.48639381 | 3 | 36840137 | 38729767 |
| dried-fruit-intake | PS | -0.0842529 | -1 | 1 | 0.00709855 | 0 | 1 | 0.849655 | 0.954583154 | 3 | 39605997 | 40897627 |
| dried-fruit-intake | PS | 0.370755 | -0.10357 | 1 | 0.137459 | 0 | 1 | 0.112596 | 0.512170663 | 3 | 42301658 | 44141693 |
| dried-fruit-intake | PS | -0.062127 | -0.51291 | 0.35838 | 0.00385976 | 0 | 0.28732 | 0.754616 | 0.923275238 | 3 | 54074845 | 54892586 |
| dried-fruit-intake | PS | -0.0822175 | -0.51059 | 0.34086 | 0.00675972 | 0 | 0.27194 | 0.684471 | 0.900136915 | 3 | 55616626 | 56954878 |
| dried-fruit-intake | PS | 0.101869 | -0.46327 | 0.74502 | 0.0103773 | 0 | 0.63909 | 0.672091 | 0.89679545 | 3 | 58557719 | 59998583 |
| dried-fruit-intake | PS | -0.0178844 | -1 | 1 | 0.000319852 | 0 | 1 | 0.964164 | 0.991798307 | 3 | 62609819 | 63670803 |
| dried-fruit-intake | PS | -0.771868 | -1 | -0.18209 | 0.59578 | 0.03633 | 1 | 0.0127779 | 0.26371942 | 3 | 65326752 | 66702084 |
| dried-fruit-intake | PS | -0.0863258 | -1 | 0.84093 | 0.00745214 | 0 | 1 | 0.812705 | 0.944536263 | 3 | 67454741 | 68319770 |
| dried-fruit-intake | PS | 0.000913889 | -0.79852 | 0.78822 | 0.000000835 | 0 | 1 | 0.99772 | 0.999256787 | 3 | 68319771 | 69784969 |
| dried-fruit-intake | PS | 0.200507 | -0.34589 | 0.88041 | 0.0402032 | 0 | 0.7988 | 0.430808 | 0.772599009 | 3 | 71223282 | 72334704 |
| dried-fruit-intake | PS | -0.56909 | -1 | 0.19663 | 0.323864 | 0 | 1 | 0.126142 | 0.529965172 | 3 | 73606613 | 74383137 |
| dried-fruit-intake | PS | 0.47032 | -0.1439 | 1 | 0.221201 | 0 | 1 | 0.131522 | 0.53799409 | 3 | 76157471 | 77507832 |
| dried-fruit-intake | PS | 0.551732 | -0.21803 | 1 | 0.304408 | 0 | 1 | 0.138402 | 0.540048903 | 3 | 85807680 | 86660979 |
| dried-fruit-intake | PS | -0.155894 | -0.89262 | 0.43942 | 0.0243029 | 0 | 0.829 | 0.560171 | 0.844653041 | 3 | 96055533 | 97351955 |
| dried-fruit-intake | PS | 0.432618 | -0.37998 | 1 | 0.187158 | 0 | 1 | 0.251243 | 0.640561778 | 3 | 98212869 | 99045104 |
| dried-fruit-intake | PS | -0.280186 | -0.8975 | 0.20044 | 0.078504 | 0 | 0.80694 | 0.230434 | 0.622398612 | 3 | 100552523 | 101906989 |
| dried-fruit-intake | PS | -0.190573 | -0.89401 | 0.37087 | 0.0363182 | 0 | 0.82162 | 0.469297 | 0.79746306 | 3 | 101906990 | 103450271 |
| dried-fruit-intake | PS | 0.217137 | -0.17078 | 0.65467 | 0.0471484 | 0 | 0.42962 | 0.259891 | 0.645890617 | 3 | 104878978 | 106174685 |
| dried-fruit-intake | PS | -0.215326 | -0.72684 | 0.18252 | 0.0463652 | 0 | 0.52941 | 0.277686 | 0.663439997 | 3 | 106174686 | 107736519 |
| dried-fruit-intake | PS | -0.0598722 | -0.42854 | 0.28391 | 0.00358468 | 0 | 0.19238 | 0.723111 | 0.910305309 | 3 | 113657666 | 115649909 |
| dried-fruit-intake | PS | -0.0726356 | -0.6702 | 0.46315 | 0.00527594 | 0 | 0.50802 | 0.766982 | 0.928727895 | 3 | 116498571 | 117241644 |
| dried-fruit-intake | PS | 0.452485 | -0.44993 | 1 | 0.204742 | 0 | 1 | 0.270575 | 0.654942995 | 3 | 118086930 | 118903053 |
| dried-fruit-intake | PS | -0.0588176 | -0.94299 | 0.72334 | 0.00345951 | 0 | 1 | 0.855011 | 0.955614217 | 3 | 119759984 | 120574477 |
| dried-fruit-intake | PS | -0.412779 | -0.8489 | -0.05228 | 0.170387 | 0.00482 | 0.72063 | 0.0266866 | 0.305371 | 3 | 122340833 | 123518507 |
| dried-fruit-intake | PS | -0.37663 | -1 | 0.74777 | 0.14185 | 0 | 1 | 0.418667 | 0.767893591 | 3 | 131373471 | 132124018 |
| dried-fruit-intake | PS | 0.311862 | -0.25139 | 1 | 0.0972576 | 0 | 1 | 0.244379 | 0.635463228 | 3 | 132925968 | 133718493 |
| dried-fruit-intake | PS | -0.187333 | -0.49428 | 0.10256 | 0.0350935 | 0 | 0.24431 | 0.205586 | 0.603996364 | 3 | 133718494 | 135288394 |
| dried-fruit-intake | PS | -0.314408 | -1 | 0.34441 | 0.0988525 | 0 | 1 | 0.314927 | 0.695891758 | 3 | 135288395 | 137372141 |
| dried-fruit-intake | PS | -0.11998 | -0.73399 | 0.42153 | 0.0143953 | 0 | 0.57769 | 0.627294 | 0.869084262 | 3 | 139831268 | 141034637 |
| dried-fruit-intake | PS | 0.389491 | -0.09893 | 1 | 0.151703 | 0 | 1 | 0.111875 | 0.509669093 | 3 | 141034638 | 141898978 |
| dried-fruit-intake | PS | -0.0978152 | -0.83946 | 0.54849 | 0.00956782 | 0 | 0.85152 | 0.723283 | 0.910305309 | 3 | 141898979 | 142976707 |
| dried-fruit-intake | PS | -0.201042 | -0.84244 | 0.32927 | 0.0404179 | 0 | 0.7236 | 0.416607 | 0.767893591 | 3 | 148638309 | 149998411 |
| dried-fruit-intake | PS | 0.203346 | -0.27587 | 0.77588 | 0.0413495 | 0 | 0.60593 | 0.375479 | 0.744326334 | 3 | 149998412 | 151131307 |
| dried-fruit-intake | PS | 0.0230689 | -0.65282 | 0.72356 | 0.000532172 | 0 | 0.72944 | 0.934729 | 0.982241359 | 3 | 151131308 | 151904021 |
| dried-fruit-intake | PS | 0.0563402 | -0.59592 | 0.73558 | 0.00317422 | 0 | 0.67016 | 0.836674 | 0.948975213 | 3 | 151904022 | 153406718 |
| dried-fruit-intake | PS | 0.129351 | -0.4112 | 0.7538 | 0.0167316 | 0 | 0.62385 | 0.609788 | 0.861631208 | 3 | 155046424 | 155928190 |
| dried-fruit-intake | PS | 0.143389 | -0.65875 | 1 | 0.0205605 | 0 | 1 | 0.676012 | 0.89679545 | 3 | 158460059 | 159478751 |
| dried-fruit-intake | PS | -0.065705 | -0.8215 | 0.59676 | 0.00431715 | 0 | 0.81945 | 0.823662 | 0.944550594 | 3 | 167118894 | 168972662 |
| dried-fruit-intake | PS | 0.631931 | 0.09083 | 1 | 0.399337 | 0.01405 | 1 | 0.0252205 | 0.305371 | 3 | 168972663 | 170174578 |
| dried-fruit-intake | PS | 0.121597 | -0.53376 | 0.87211 | 0.0147859 | 0 | 0.87992 | 0.669232 | 0.89492409 | 3 | 170174579 | 171134849 |
| dried-fruit-intake | PS | -0.0260201 | -1 | 0.92031 | 0.000677044 | 0 | 1 | 0.940658 | 0.985307578 | 3 | 171134850 | 172004760 |
| dried-fruit-intake | PS | -0.231246 | -0.93918 | 0.29888 | 0.0534749 | 0 | 0.89128 | 0.365421 | 0.739445468 | 3 | 172004761 | 173415591 |
| dried-fruit-intake | PS | 0.05548 | -0.35609 | 0.47046 | 0.00307803 | 0 | 0.24572 | 0.777734 | 0.930091265 | 3 | 178110323 | 179372165 |
| dried-fruit-intake | PS | 0.293992 | -0.09149 | 0.74676 | 0.0864312 | 0 | 0.55765 | 0.133888 | 0.538519961 | 3 | 181424324 | 183203155 |
| dried-fruit-intake | PS | 0.285859 | -0.50284 | 1 | 0.0817154 | 0 | 1 | 0.410836 | 0.76747083 | 3 | 184524269 | 185709996 |
| dried-fruit-intake | PS | 0.0564949 | -0.23089 | 0.34996 | 0.00319167 | 0 | 0.12873 | 0.691763 | 0.901915352 | 3 | 187939200 | 189451805 |
| dried-fruit-intake | PS | -0.192887 | -0.6568 | 0.21153 | 0.0372053 | 0 | 0.43274 | 0.332078 | 0.71108814 | 3 | 193122091 | 194217140 |
| dried-fruit-intake | PS | 0.167621 | -0.4652 | 0.91375 | 0.0280968 | 0 | 0.90034 | 0.55525 | 0.84420035 | 3 | 196383153 | 197147990 |
| dried-fruit-intake | PS | -0.175723 | -1 | 0.49579 | 0.0308785 | 0 | 1 | 0.562326 | 0.845171061 | 3 | 197147991 | 197962380 |
| dried-fruit-intake | PS | 0.33267 | -0.1191 | 0.9642 | 0.110669 | 0 | 0.93196 | 0.141116 | 0.544641084 | 4 | 1529268 | 2468935 |
| dried-fruit-intake | PS | -0.153833 | -0.72149 | 0.32622 | 0.0236645 | 0 | 0.5421 | 0.511216 | 0.822603387 | 4 | 2468936 | 3549229 |
| dried-fruit-intake | PS | -0.0214224 | -0.91849 | 0.80048 | 0.000458918 | 0 | 1 | 0.947185 | 0.98795147 | 4 | 3549230 | 4266178 |
| dried-fruit-intake | PS | -0.543415 | -1 | 0.28634 | 0.2953 | 0 | 1 | 0.178139 | 0.582803181 | 4 | 14395887 | 14967147 |
| dried-fruit-intake | PS | 0.371021 | -0.0976 | 1 | 0.137656 | 0 | 1 | 0.115952 | 0.516275157 | 4 | 15910802 | 17290236 |
| dried-fruit-intake | PS | -0.254037 | -1 | 0.7055 | 0.0645349 | 0 | 1 | 0.519262 | 0.822603387 | 4 | 17290237 | 18753263 |
| dried-fruit-intake | PS | 0.0758122 | -0.51088 | 0.70429 | 0.00574749 | 0 | 0.58171 | 0.766846 | 0.928727895 | 4 | 18753264 | 20086838 |
| dried-fruit-intake | PS | 0.0934507 | -0.46872 | 0.74457 | 0.00873303 | 0 | 0.64816 | 0.702309 | 0.903972224 | 4 | 20086839 | 21416380 |
| dried-fruit-intake | PS | 0.458926 | -0.33415 | 1 | 0.210614 | 0 | 1 | 0.209139 | 0.606076286 | 4 | 21416381 | 22835185 |
| dried-fruit-intake | PS | -0.221899 | -0.70143 | 0.19175 | 0.0492391 | 0 | 0.49233 | 0.276104 | 0.661111191 | 4 | 25832019 | 27385580 |
| dried-fruit-intake | PS | 0.318761 | -0.62985 | 1 | 0.101608 | 0 | 1 | 0.430392 | 0.772599009 | 4 | 32260118 | 32746820 |
| dried-fruit-intake | PS | 0.153948 | -0.58058 | 1 | 0.0236999 | 0 | 1 | 0.614035 | 0.863358047 | 4 | 39820062 | 40590541 |
| dried-fruit-intake | PS | -0.151369 | -0.63958 | 0.29517 | 0.0229126 | 0 | 0.41644 | 0.482151 | 0.802193156 | 4 | 41360938 | 42189251 |
| dried-fruit-intake | PS | 0.339926 | -0.26229 | 1 | 0.11555 | 0 | 1 | 0.249366 | 0.637767702 | 4 | 42189252 | 43192424 |
| dried-fruit-intake | PS | 0.226773 | -0.26393 | 0.82233 | 0.051426 | 0 | 0.68493 | 0.350587 | 0.726522425 | 4 | 43962562 | 45186767 |
| dried-fruit-intake | PS | 0.0750178 | -0.81311 | 1 | 0.00562766 | 0 | 1 | 0.827083 | 0.945816904 | 4 | 46358361 | 47408265 |
| dried-fruit-intake | PS | -0.0736259 | -0.7604 | 0.55134 | 0.00542078 | 0 | 0.73419 | 0.78618 | 0.933113527 | 4 | 57103101 | 58011085 |
| dried-fruit-intake | PS | 0.143366 | -0.2822 | 0.61542 | 0.0205539 | 0 | 0.38359 | 0.492241 | 0.809496025 | 4 | 58011086 | 58940256 |
| dried-fruit-intake | PS | 0.0145557 | -0.93433 | 0.99691 | 0.000211869 | 0 | 1 | 0.966741 | 0.992684493 | 4 | 60746710 | 61971161 |
| dried-fruit-intake | PS | 0.15495 | -0.44646 | 0.86732 | 0.0240095 | 0 | 0.80686 | 0.559517 | 0.844653041 | 4 | 67616363 | 68742859 |
| dried-fruit-intake | PS | 0.124087 | -0.63874 | 1 | 0.0153977 | 0 | 1 | 0.695539 | 0.903592034 | 4 | 85437806 | 86931670 |
| dried-fruit-intake | PS | 0.205008 | -0.45365 | 0.97498 | 0.0420284 | 0 | 1 | 0.473399 | 0.798104958 | 4 | 86931671 | 88502717 |
| dried-fruit-intake | PS | -0.485086 | -1 | 0.31774 | 0.235308 | 0 | 1 | 0.200436 | 0.602877424 | 4 | 88502718 | 89244554 |
| dried-fruit-intake | PS | -0.0387139 | -0.81251 | 0.65505 | 0.00149877 | 0 | 0.90609 | 0.893986 | 0.971310138 | 4 | 89244555 | 90236971 |
| dried-fruit-intake | PS | -0.293458 | -1 | 0.2539 | 0.0861177 | 0 | 1 | 0.282193 | 0.66882608 | 4 | 99532481 | 100333334 |
| dried-fruit-intake | PS | 0.237955 | -0.97512 | 1 | 0.0566228 | 0 | 1 | 0.59928 | 0.858442316 | 4 | 102544804 | 104384534 |
| dried-fruit-intake | PS | -0.0371464 | -0.70316 | 0.58753 | 0.00137985 | 0 | 0.62294 | 0.890314 | 0.970455339 | 4 | 105319196 | 106479155 |
| dried-fruit-intake | PS | 0.0688034 | -0.45488 | 0.64229 | 0.0047339 | 0 | 0.46863 | 0.776224 | 0.929934281 | 4 | 106479156 | 108131206 |
| dried-fruit-intake | PS | -0.218644 | -1 | 0.4064 | 0.0478051 | 0 | 1 | 0.445397 | 0.783590257 | 4 | 108131207 | 109122458 |
| dried-fruit-intake | PS | 0.14943 | -0.32467 | 0.67446 | 0.0223293 | 0 | 0.46068 | 0.498105 | 0.812187184 | 4 | 109978983 | 111733579 |
| dried-fruit-intake | PS | -0.0672055 | -0.84101 | 0.63801 | 0.00451658 | 0 | 0.90915 | 0.816375 | 0.944542385 | 4 | 117313637 | 118395262 |
| dried-fruit-intake | PS | 0.1835 | -0.24472 | 0.62338 | 0.0336724 | 0 | 0.39087 | 0.370931 | 0.743772391 | 4 | 118395263 | 119138097 |
| dried-fruit-intake | PS | 0.0878548 | -0.66264 | 0.89658 | 0.00771847 | 0 | 0.98612 | 0.777052 | 0.929934281 | 4 | 121393009 | 121981243 |
| dried-fruit-intake | PS | -0.303803 | -0.58371 | -0.04538 | 0.0922961 | 0.00286 | 0.34072 | 0.0215725 | 0.293565771 | 4 | 121981244 | 122655434 |
| dried-fruit-intake | PS | -0.162276 | -0.62274 | 0.23971 | 0.0263334 | 0 | 0.39161 | 0.405964 | 0.764274119 | 4 | 122655435 | 123768693 |
| dried-fruit-intake | PS | -1 | -1 | -0.25715 | 1 | 0.0682 | 1 | 0.00216968 | 0.145139734 | 4 | 127279172 | 128321876 |
| dried-fruit-intake | PS | 0.0211749 | -0.89643 | 0.94743 | 0.000448375 | 0 | 1 | 0.949841 | 0.988270375 | 4 | 135809543 | 137400031 |
| dried-fruit-intake | PS | -0.0710799 | -0.56807 | 0.38901 | 0.00505235 | 0 | 0.35041 | 0.73827 | 0.917849189 | 4 | 141087048 | 142807914 |
| dried-fruit-intake | PS | 0.422143 | -0.00002 | 0.96552 | 0.178205 | 0 | 0.93223 | 0.0495886 | 0.374898999 | 4 | 146174872 | 147161042 |
| dried-fruit-intake | PS | 0.0430873 | -0.45481 | 0.53317 | 0.00185652 | 0 | 0.34255 | 0.848615 | 0.953742805 | 4 | 149998529 | 151014322 |
| dried-fruit-intake | PS | -0.0635897 | -0.80119 | 0.59077 | 0.00404365 | 0 | 0.77605 | 0.820992 | 0.944542385 | 4 | 152162099 | 153520883 |
| dried-fruit-intake | PS | -0.198384 | -0.86817 | 0.31537 | 0.0393563 | 0 | 0.76638 | 0.411464 | 0.76747083 | 4 | 155044410 | 156520288 |
| dried-fruit-intake | PS | 0.146525 | -0.38834 | 0.75949 | 0.0214695 | 0 | 0.60003 | 0.554553 | 0.843974883 | 4 | 157597310 | 159176073 |
| dried-fruit-intake | PS | -0.542103 | -1 | 0.12952 | 0.293876 | 0 | 1 | 0.109547 | 0.508421114 | 4 | 162239290 | 163245541 |
| dried-fruit-intake | PS | -0.178772 | -0.85708 | 0.34462 | 0.0319594 | 0 | 0.75944 | 0.472404 | 0.797472807 | 4 | 174470207 | 175295842 |
| dried-fruit-intake | PS | 0.422819 | -0.06518 | 1 | 0.178776 | 0 | 1 | 0.0897451 | 0.478016906 | 4 | 175959698 | 177129678 |
| dried-fruit-intake | PS | -0.194113 | -0.94162 | 0.42002 | 0.0376797 | 0 | 0.93319 | 0.488065 | 0.805889628 | 4 | 178314528 | 179233905 |
| dried-fruit-intake | PS | -0.133955 | -0.79631 | 0.42219 | 0.017944 | 0 | 0.67174 | 0.604747 | 0.860368673 | 4 | 181122434 | 182065646 |
| dried-fruit-intake | PS | 0.55818 | 0.16667 | 1 | 0.311565 | 0.02796 | 1 | 0.00827067 | 0.219609823 | 4 | 182946259 | 183603892 |
| dried-fruit-intake | PS | -0.0117539 | -0.40668 | 0.36657 | 0.000138155 | 0 | 0.20494 | 0.948702 | 0.98795147 | 4 | 184338585 | 185483262 |
| dried-fruit-intake | PS | 0.575553 | 0.11635 | 1 | 0.331261 | 0.01586 | 1 | 0.0197493 | 0.292402657 | 4 | 189899574 | 191043880 |
| dried-fruit-intake | PS | -0.362483 | -1 | 0.51115 | 0.131394 | 0 | 1 | 0.360239 | 0.73602576 | 5 | 2106886 | 2960068 |
| dried-fruit-intake | PS | 0.014148 | -0.75188 | 0.8113 | 0.000200167 | 0 | 1 | 0.962876 | 0.991317435 | 5 | 4636543 | 5828694 |
| dried-fruit-intake | PS | -0.263451 | -0.79999 | 0.18249 | 0.0694066 | 0 | 0.64269 | 0.227263 | 0.620938095 | 5 | 5828695 | 6936733 |
| dried-fruit-intake | PS | 0.539198 | 0.02123 | 1 | 0.290735 | 0.00526 | 1 | 0.0453645 | 0.364895451 | 5 | 6936734 | 8079415 |
| dried-fruit-intake | PS | -0.0513598 | -0.37981 | 0.2558 | 0.00263783 | 0 | 0.15381 | 0.743639 | 0.920916669 | 5 | 10549030 | 11850850 |
| dried-fruit-intake | PS | -0.234861 | -0.94962 | 0.31084 | 0.0551595 | 0 | 0.91385 | 0.369822 | 0.743772391 | 5 | 13608148 | 14910295 |
| dried-fruit-intake | PS | -0.497379 | -1 | 0.1189 | 0.247386 | 0 | 1 | 0.111165 | 0.50893337 | 5 | 14910296 | 16592319 |
| dried-fruit-intake | PS | -0.320175 | -0.86614 | 0.09668 | 0.102512 | 0 | 0.7517 | 0.129699 | 0.534632683 | 5 | 16592320 | 17803477 |
| dried-fruit-intake | PS | -0.0329012 | -1 | 1 | 0.00108249 | 0 | 1 | 0.934296 | 0.982241359 | 5 | 22149043 | 23246745 |
| dried-fruit-intake | PS | -0.176985 | -0.76536 | 0.29562 | 0.0313237 | 0 | 0.59718 | 0.425304 | 0.772468002 | 5 | 30416067 | 31679464 |
| dried-fruit-intake | PS | -0.602483 | -1 | 0.05926 | 0.362986 | 0 | 1 | 0.0729668 | 0.445438446 | 5 | 35157147 | 36431967 |
| dried-fruit-intake | PS | -0.134873 | -0.53455 | 0.23133 | 0.0181907 | 0 | 0.28773 | 0.447992 | 0.785321521 | 5 | 37925488 | 39438985 |
| dried-fruit-intake | PS | 0.124587 | -0.81093 | 1 | 0.0155219 | 0 | 1 | 0.7345 | 0.917848257 | 5 | 52837226 | 53747856 |
| dried-fruit-intake | PS | -0.508248 | -1 | -0.04284 | 0.258316 | 0.00545 | 1 | 0.0332 | 0.334664198 | 5 | 55221399 | 55968966 |
| dried-fruit-intake | PS | -0.76304 | -1 | -0.25452 | 0.582231 | 0.06611 | 1 | 0.00505646 | 0.192027888 | 5 | 55968967 | 56896890 |
| dried-fruit-intake | PS | 0.218179 | -0.2328 | 0.71107 | 0.0476021 | 0 | 0.50608 | 0.314748 | 0.695891758 | 5 | 58721459 | 59868567 |
| dried-fruit-intake | PS | 0.136918 | -0.47784 | 0.88607 | 0.0187465 | 0 | 0.87812 | 0.60563 | 0.860368673 | 5 | 60930754 | 62180368 |
| dried-fruit-intake | PS | 0.160409 | -0.47175 | 0.91982 | 0.0257312 | 0 | 0.9331 | 0.558182 | 0.844653041 | 5 | 62180369 | 63214089 |
| dried-fruit-intake | PS | 0.340337 | -0.12727 | 0.96736 | 0.115829 | 0 | 0.93621 | 0.144187 | 0.545236775 | 5 | 67096192 | 68006993 |
| dried-fruit-intake | PS | -0.219524 | -1 | 0.3866 | 0.0481907 | 0 | 1 | 0.444652 | 0.783297428 | 5 | 71468652 | 73314061 |
| dried-fruit-intake | PS | 0.208655 | -0.49822 | 1 | 0.043537 | 0 | 1 | 0.498549 | 0.812505506 | 5 | 75239303 | 75959515 |
| dried-fruit-intake | PS | -0.106683 | -0.49603 | 0.24708 | 0.0113813 | 0 | 0.24934 | 0.542173 | 0.838940829 | 5 | 75959516 | 77290255 |
| dried-fruit-intake | PS | 0.590621 | -0.01421 | 1 | 0.348833 | 0 | 1 | 0.059414 | 0.406350706 | 5 | 77290256 | 79005158 |
| dried-fruit-intake | PS | 0.28178 | -0.19426 | 0.91956 | 0.0793998 | 0 | 0.85136 | 0.240659 | 0.631826603 | 5 | 82720249 | 84094797 |
| dried-fruit-intake | PS | -0.104533 | -0.54345 | 0.30177 | 0.0109271 | 0 | 0.30451 | 0.587461 | 0.855475038 | 5 | 87943483 | 89584466 |
| dried-fruit-intake | PS | -0.254839 | -0.83391 | 0.18863 | 0.0649429 | 0 | 0.69801 | 0.239124 | 0.62931425 | 5 | 91956906 | 93814604 |
| dried-fruit-intake | PS | -0.237234 | -0.84431 | 0.22727 | 0.0562799 | 0 | 0.71555 | 0.303553 | 0.687150579 | 5 | 95117260 | 96467377 |
| dried-fruit-intake | PS | 0.357477 | -0.32738 | 1 | 0.12779 | 0 | 1 | 0.265499 | 0.650990791 | 5 | 117348498 | 118605251 |
| dried-fruit-intake | PS | -0.195316 | -0.53826 | 0.11956 | 0.0381482 | 0 | 0.28972 | 0.226521 | 0.620938095 | 5 | 123191942 | 124109485 |
| dried-fruit-intake | PS | -0.298951 | -1 | 0.2282 | 0.0893716 | 0 | 1 | 0.247388 | 0.637199691 | 5 | 125131721 | 126054697 |
| dried-fruit-intake | PS | -0.201344 | -0.79771 | 0.25749 | 0.0405392 | 0 | 0.66994 | 0.345763 | 0.720192575 | 5 | 132554691 | 134556570 |
| dried-fruit-intake | PS | -0.54798 | -1 | 0.13245 | 0.300282 | 0 | 1 | 0.11389 | 0.514474053 | 5 | 143605909 | 145319096 |
| dried-fruit-intake | PS | -0.0630313 | -0.42773 | 0.26919 | 0.00397295 | 0 | 0.19162 | 0.710871 | 0.906057359 | 5 | 148662215 | 149850203 |
| dried-fruit-intake | PS | -0.428866 | -0.85914 | -0.15324 | 0.183926 | 0.02353 | 0.73813 | 0.00321819 | 0.172305058 | 5 | 149850204 | 150981934 |
| dried-fruit-intake | PS | 0.203317 | -0.60204 | 1 | 0.0413379 | 0 | 1 | 0.549961 | 0.843473948 | 5 | 152878628 | 153734494 |
| dried-fruit-intake | PS | -0.225062 | -1 | 0.61407 | 0.0506528 | 0 | 1 | 0.535588 | 0.833763143 | 5 | 153734495 | 154599750 |
| dried-fruit-intake | PS | 0.0382398 | -0.69344 | 0.78097 | 0.00146228 | 0 | 0.84405 | 0.897399 | 0.971785522 | 5 | 154599751 | 155459556 |
| dried-fruit-intake | PS | 0.547529 | -0.2779 | 1 | 0.299788 | 0 | 1 | 0.172733 | 0.582296617 | 5 | 155459557 | 156345451 |
| dried-fruit-intake | PS | 0.178272 | -0.09886 | 0.47377 | 0.0317808 | 0 | 0.22446 | 0.198431 | 0.602861066 | 5 | 157191082 | 158484775 |
| dried-fruit-intake | PS | 0.0604842 | -0.6718 | 0.82261 | 0.00365834 | 0 | 0.84799 | 0.839295 | 0.949371541 | 5 | 160519050 | 161478177 |
| dried-fruit-intake | PS | -0.0311819 | -0.58361 | 0.51075 | 0.00097231 | 0 | 0.47094 | 0.893448 | 0.971310138 | 5 | 165289212 | 166863413 |
| dried-fruit-intake | PS | 0.10547 | -0.3141 | 0.59685 | 0.0111239 | 0 | 0.37598 | 0.597428 | 0.856916929 | 5 | 166863414 | 168342743 |
| dried-fruit-intake | PS | -0.428458 | -1 | 0.19601 | 0.183576 | 0 | 1 | 0.153045 | 0.559110705 | 5 | 168342744 | 169506966 |
| dried-fruit-intake | PS | -0.654351 | -1 | -0.15391 | 0.428175 | 0.025 | 1 | 0.0127204 | 0.26371942 | 5 | 169506967 | 170898340 |
| dried-fruit-intake | PS | -0.388322 | -1 | 0.04836 | 0.150794 | 0 | 1 | 0.0833354 | 0.462902545 | 5 | 173606996 | 174662885 |
| dried-fruit-intake | PS | 0.460501 | -0.12837 | 1 | 0.212061 | 0 | 1 | 0.110237 | 0.508421114 | 5 | 174662886 | 176180301 |
| dried-fruit-intake | PS | -0.000484333 | -0.29879 | 0.30099 | 0.000000235 | 0 | 0.11448 | 0.997351 | 0.999256787 | 5 | 176180302 | 177659902 |
| dried-fruit-intake | PS | -0.0315882 | -0.99619 | 0.8449 | 0.000997815 | 0 | 1 | 0.925008 | 0.979709984 | 5 | 177659903 | 178595252 |
| dried-fruit-intake | PS | -0.180371 | -0.64251 | 0.22426 | 0.0325338 | 0 | 0.41418 | 0.368805 | 0.742612287 | 5 | 178595253 | 179794710 |
| dried-fruit-intake | PS | -0.079255 | -0.41436 | 0.24293 | 0.00628136 | 0 | 0.17431 | 0.618286 | 0.866290037 | 6 | 63979 | 1380679 |
| dried-fruit-intake | PS | -0.185883 | -1 | 0.46193 | 0.0345526 | 0 | 1 | 0.52205 | 0.823281169 | 6 | 2746532 | 3964072 |
| dried-fruit-intake | PS | -0.397131 | -0.89812 | -0.01119 | 0.157713 | 0.00273 | 0.80661 | 0.0437766 | 0.360793635 | 6 | 5378214 | 6621937 |
| dried-fruit-intake | PS | -0.643779 | -1 | 0.17796 | 0.414451 | 0 | 1 | 0.114395 | 0.515861321 | 6 | 6621938 | 7808323 |
| dried-fruit-intake | PS | 0.368386 | -0.16648 | 1 | 0.135708 | 0 | 1 | 0.154295 | 0.562312094 | 6 | 9020711 | 10416550 |
| dried-fruit-intake | PS | 0.18215 | -0.62654 | 1 | 0.0331784 | 0 | 1 | 0.593556 | 0.856056811 | 6 | 10416551 | 11790671 |
| dried-fruit-intake | PS | 0.521653 | -0.0603 | 1 | 0.272122 | 0 | 1 | 0.0816128 | 0.460358212 | 6 | 15069422 | 16566882 |
| dried-fruit-intake | PS | -0.806713 | -1 | -0.17384 | 0.650786 | 0.03339 | 1 | 0.0154959 | 0.273599214 | 6 | 16566883 | 17391994 |
| dried-fruit-intake | PS | 0.00783243 | -0.48333 | 0.51335 | 0.0000613 | 0 | 0.38019 | 0.970847 | 0.993719113 | 6 | 20418021 | 21295864 |
| dried-fruit-intake | PS | -0.184212 | -0.64702 | 0.17125 | 0.0339341 | 0 | 0.41989 | 0.294602 | 0.677856 | 6 | 21295865 | 22199713 |
| dried-fruit-intake | PS | 0.153343 | -0.28948 | 0.70136 | 0.023514 | 0 | 0.50866 | 0.455435 | 0.790356382 | 6 | 23192338 | 23939306 |
| dried-fruit-intake | PS | -0.0908367 | -0.3002 | 0.11705 | 0.00825131 | 0 | 0.09012 | 0.377414 | 0.744344278 | 6 | 23939307 | 24950379 |
| dried-fruit-intake | PS | 0.0543709 | -0.13196 | 0.24242 | 0.0029562 | 0 | 0.05911 | 0.554379 | 0.843974883 | 6 | 24950380 | 25684629 |
| dried-fruit-intake | PS | -0.0741712 | -0.29506 | 0.1408 | 0.00550136 | 0 | 0.08879 | 0.489278 | 0.806415277 | 6 | 25684630 | 26396200 |
| dried-fruit-intake | PS | 0.088995 | -0.27357 | 0.51429 | 0.00792012 | 0 | 0.28451 | 0.602561 | 0.859194646 | 6 | 26396201 | 27261035 |
| dried-fruit-intake | PS | -0.276171 | -0.60394 | -0.01729 | 0.0762704 | 0.00142 | 0.36474 | 0.039121 | 0.352687624 | 6 | 27261036 | 28666364 |
| dried-fruit-intake | PS | -0.0439812 | -0.41402 | 0.29804 | 0.00193434 | 0 | 0.19019 | 0.782715 | 0.932406685 | 6 | 28666365 | 29529755 |
| dried-fruit-intake | PS | 0.106684 | -0.27906 | 0.53092 | 0.0113816 | 0 | 0.29926 | 0.550164 | 0.843473948 | 6 | 29529756 | 29833843 |
| dried-fruit-intake | PS | 0.328217 | -0.02427 | 0.75637 | 0.107727 | 0 | 0.57229 | 0.0603897 | 0.407637204 | 6 | 29833844 | 30070717 |
| dried-fruit-intake | PS | 0.119236 | -0.16666 | 0.4479 | 0.0142173 | 0 | 0.20475 | 0.404111 | 0.762464775 | 6 | 30070718 | 30715006 |
| dried-fruit-intake | PS | 0.0223525 | -0.19667 | 0.25272 | 0.000499635 | 0 | 0.0695 | 0.839597 | 0.949371541 | 6 | 30715007 | 31106493 |
| dried-fruit-intake | PS | 0.051627 | -0.19099 | 0.2941 | 0.00266535 | 0 | 0.08955 | 0.671223 | 0.896391487 | 6 | 31106494 | 31250556 |
| dried-fruit-intake | PS | 0.0199896 | -0.22487 | 0.26001 | 0.000399582 | 0 | 0.07885 | 0.868198 | 0.959359878 | 6 | 31250557 | 31320268 |
| dried-fruit-intake | PS | 0.138858 | -0.12185 | 0.40662 | 0.0192815 | 0 | 0.16551 | 0.293175 | 0.676520993 | 6 | 31320269 | 31427209 |
| dried-fruit-intake | PS | 0.0334324 | -0.15007 | 0.22086 | 0.00111773 | 0 | 0.0519 | 0.717063 | 0.90666967 | 6 | 31427210 | 32208901 |
| dried-fruit-intake | PS | 0.0155556 | -0.25578 | 0.28096 | 0.000241977 | 0 | 0.09481 | 0.905809 | 0.975080055 | 6 | 32208902 | 32454577 |
| dried-fruit-intake | PS | -0.312915 | -0.81608 | 0.17046 | 0.0979158 | 0 | 0.66598 | 0.181845 | 0.586284077 | 6 | 32454578 | 32539567 |
| dried-fruit-intake | PS | 0.130055 | -0.15354 | 0.43382 | 0.0169143 | 0 | 0.18867 | 0.357996 | 0.733165841 | 6 | 32539568 | 32586784 |
| dried-fruit-intake | PS | 0.0332966 | -0.10285 | 0.1658 | 0.00110867 | 0 | 0.02798 | 0.620494 | 0.867109031 | 6 | 32586785 | 32629239 |
| dried-fruit-intake | PS | 0.0919674 | -0.2551 | 0.45739 | 0.008458 | 0 | 0.22192 | 0.577185 | 0.852208956 | 6 | 32629240 | 32682213 |
| dried-fruit-intake | PS | 0.131379 | -0.11289 | 0.38307 | 0.0172604 | 0 | 0.14674 | 0.291142 | 0.67501725 | 6 | 32682214 | 32897998 |
| dried-fruit-intake | PS | 0.151857 | -0.0937 | 0.41034 | 0.0230605 | 0 | 0.16838 | 0.206326 | 0.603996364 | 6 | 32897999 | 33194975 |
| dried-fruit-intake | PS | -0.0139539 | -0.20731 | 0.1729 | 0.00019471 | 0 | 0.04935 | 0.8818 | 0.965761891 | 6 | 33194976 | 33864262 |
| dried-fruit-intake | PS | -0.0356133 | -0.26268 | 0.18257 | 0.0012683 | 0 | 0.07247 | 0.742274 | 0.920682176 | 6 | 33864263 | 34979270 |
| dried-fruit-intake | PS | -0.0261504 | -0.35156 | 0.29512 | 0.000683842 | 0 | 0.1448 | 0.868006 | 0.959359878 | 6 | 34979271 | 36346353 |
| dried-fruit-intake | PS | -0.22853 | -0.50032 | 0.02038 | 0.0522258 | 0 | 0.25032 | 0.0786749 | 0.457283004 | 6 | 36346354 | 37570051 |
| dried-fruit-intake | PS | -0.131233 | -0.47448 | 0.20448 | 0.0172221 | 0 | 0.22778 | 0.427576 | 0.772599009 | 6 | 37570052 | 38688720 |
| dried-fruit-intake | PS | -0.60709 | -1 | -0.06327 | 0.368558 | 0.00846 | 1 | 0.0326594 | 0.333713979 | 6 | 39785908 | 40778401 |
| dried-fruit-intake | PS | 0.079359 | -0.57775 | 0.79984 | 0.00629784 | 0 | 0.74766 | 0.776424 | 0.929934281 | 6 | 40778402 | 42103738 |
| dried-fruit-intake | PS | -0.770993 | -1 | -0.04106 | 0.59443 | 0.0125 | 1 | 0.0392167 | 0.352687624 | 6 | 42103739 | 43770626 |
| dried-fruit-intake | PS | -0.259168 | -0.59905 | 0.05153 | 0.067168 | 0 | 0.35886 | 0.0963984 | 0.482879102 | 6 | 43770627 | 44596897 |
| dried-fruit-intake | PS | -0.20681 | -0.67277 | 0.18881 | 0.0427703 | 0 | 0.45431 | 0.288012 | 0.675011382 | 6 | 45408422 | 46430701 |
| dried-fruit-intake | PS | 0.131146 | -0.35228 | 0.67859 | 0.0171992 | 0 | 0.49124 | 0.569557 | 0.848619143 | 6 | 46430702 | 47313443 |
| dried-fruit-intake | PS | -0.194113 | -0.62611 | 0.19114 | 0.03768 | 0 | 0.39201 | 0.317103 | 0.69694374 | 6 | 50940768 | 51826423 |
| dried-fruit-intake | PS | -0.17692 | -0.64195 | 0.23779 | 0.0313008 | 0 | 0.41992 | 0.379672 | 0.747107314 | 6 | 51826424 | 52598879 |
| dried-fruit-intake | PS | -0.439181 | -1 | -0.02399 | 0.19288 | 0.00392 | 1 | 0.0464014 | 0.366783605 | 6 | 56200986 | 57316157 |
| dried-fruit-intake | PS | -0.0892313 | -0.71993 | 0.47735 | 0.00796222 | 0 | 0.58318 | 0.7282 | 0.913326114 | 6 | 57316158 | 58141889 |
| dried-fruit-intake | PS | 0.080877 | -0.47812 | 0.6723 | 0.00654109 | 0 | 0.53351 | 0.745964 | 0.921979566 | 6 | 61883561 | 62693128 |
| dried-fruit-intake | PS | -0.258941 | -0.6071 | 0.03801 | 0.0670503 | 0 | 0.36857 | 0.096363 | 0.482879102 | 6 | 62693129 | 64010286 |
| dried-fruit-intake | PS | -0.256502 | -0.99627 | 0.30834 | 0.0657934 | 0 | 1 | 0.337053 | 0.713887872 | 6 | 64010287 | 65759861 |
| dried-fruit-intake | PS | -0.33808 | -1 | 0.51024 | 0.114298 | 0 | 1 | 0.368079 | 0.742523789 | 6 | 72290724 | 73170168 |
| dried-fruit-intake | PS | 0.14179 | -0.35676 | 0.70968 | 0.0201044 | 0 | 0.52781 | 0.543796 | 0.838940829 | 6 | 73170169 | 74401506 |
| dried-fruit-intake | PS | -0.407284 | -1 | 0.41182 | 0.165881 | 0 | 1 | 0.289763 | 0.675011382 | 6 | 79859904 | 80693927 |
| dried-fruit-intake | PS | 0.214655 | -0.5625 | 1 | 0.0460769 | 0 | 1 | 0.51737 | 0.822603387 | 6 | 82388205 | 83571953 |
| dried-fruit-intake | PS | 0.0875378 | -0.98138 | 1 | 0.00766286 | 0 | 1 | 0.819891 | 0.944542385 | 6 | 85837204 | 86818669 |
| dried-fruit-intake | PS | -0.399699 | -1 | 0.09345 | 0.15976 | 0 | 1 | 0.103853 | 0.497135592 | 6 | 86818670 | 87516322 |
| dried-fruit-intake | PS | 0.00198166 | -0.46245 | 0.46933 | 0.00000393 | 0 | 0.29806 | 0.992726 | 0.998435708 | 6 | 88499746 | 89974267 |
| dried-fruit-intake | PS | -0.395928 | -1 | 0.05278 | 0.156759 | 0 | 1 | 0.0796243 | 0.4584705 | 6 | 91097025 | 92015279 |
| dried-fruit-intake | PS | 0.38448 | -0.15439 | 1 | 0.147825 | 0 | 1 | 0.155093 | 0.562815264 | 6 | 93696826 | 95176337 |
| dried-fruit-intake | PS | 0.409797 | 0.02439 | 0.88374 | 0.167934 | 0.00338 | 0.781 | 0.0368686 | 0.35091556 | 6 | 95176338 | 96480153 |
| dried-fruit-intake | PS | NA | NA | NA | NA | NA | NA | NA | NA | 6 | 96480154 | 98173003 |
| dried-fruit-intake | PS | -0.0734376 | -0.45391 | 0.29318 | 0.00539308 | 0 | 0.21842 | 0.677951 | 0.89679545 | 6 | 98173004 | 99678876 |
| dried-fruit-intake | PS | -0.0089168 | -0.73439 | 0.6584 | 0.0000795 | 0 | 0.71208 | 0.97505 | 0.995069902 | 6 | 101793543 | 102637706 |
| dried-fruit-intake | PS | 0.18762 | -0.05769 | 0.45769 | 0.0352014 | 0 | 0.20948 | 0.136424 | 0.540048903 | 6 | 106053916 | 107309327 |
| dried-fruit-intake | PS | 0.145652 | -0.4053 | 0.75463 | 0.0212144 | 0 | 0.60893 | 0.560028 | 0.844653041 | 6 | 107309328 | 109043244 |
| dried-fruit-intake | PS | 0.0625487 | -0.52152 | 0.70739 | 0.00391234 | 0 | 0.57548 | 0.801643 | 0.941447694 | 6 | 109043245 | 110647842 |
| dried-fruit-intake | PS | -0.322258 | -1 | 0.22179 | 0.10385 | 0 | 1 | 0.221153 | 0.620520359 | 6 | 110647843 | 111363443 |
| dried-fruit-intake | PS | 0.269966 | -0.16912 | 0.92935 | 0.0728819 | 0 | 0.87996 | 0.201237 | 0.602877424 | 6 | 111363444 | 112342873 |
| dried-fruit-intake | PS | 0.37908 | -0.04461 | 0.92957 | 0.143701 | 0 | 0.8641 | 0.0834812 | 0.462902545 | 6 | 112342874 | 113705003 |
| dried-fruit-intake | PS | 0.25059 | -0.70904 | 1 | 0.0627952 | 0 | 1 | 0.518365 | 0.822603387 | 6 | 113705004 | 115062811 |
| dried-fruit-intake | PS | -0.230887 | -1 | 0.37183 | 0.0533087 | 0 | 1 | 0.419866 | 0.767893591 | 6 | 116132148 | 117674076 |
| dried-fruit-intake | PS | 0.0434822 | -0.90677 | 0.99913 | 0.0018907 | 0 | 1 | 0.899512 | 0.9724615 | 6 | 125365055 | 127545459 |
| dried-fruit-intake | PS | 0.370082 | -0.28644 | 1 | 0.136961 | 0 | 1 | 0.232513 | 0.622842262 | 6 | 130550138 | 131457164 |
| dried-fruit-intake | PS | 0.305291 | -0.57825 | 1 | 0.0932025 | 0 | 1 | 0.421991 | 0.768668492 | 6 | 131457165 | 132890694 |
| dried-fruit-intake | PS | 0.134597 | -0.29922 | 0.58535 | 0.0181165 | 0 | 0.35679 | 0.502154 | 0.814819138 | 6 | 134313644 | 135544083 |
| dried-fruit-intake | PS | 0.0178045 | -0.37353 | 0.43999 | 0.000317001 | 0 | 0.26806 | 0.917721 | 0.977166335 | 6 | 137553213 | 138825721 |
| dried-fruit-intake | PS | -0.348248 | -1 | 0.19811 | 0.121277 | 0 | 1 | 0.193506 | 0.599043219 | 6 | 138825722 | 139716713 |
| dried-fruit-intake | PS | 0.628485 | 0.12385 | 1 | 0.394993 | 0.01707 | 1 | 0.0212384 | 0.292402657 | 6 | 141449454 | 143083347 |
| dried-fruit-intake | PS | 0.608241 | 0.2106 | 1 | 0.369957 | 0.04435 | 1 | 0.00384895 | 0.178799682 | 6 | 143083348 | 144791455 |
| dried-fruit-intake | PS | 0.149616 | -0.68698 | 1 | 0.022385 | 0 | 1 | 0.665873 | 0.893484477 | 6 | 145778283 | 147015882 |
| dried-fruit-intake | PS | 0.00111073 | -0.4134 | 0.41883 | 0.00000123 | 0 | 0.22955 | 0.995465 | 0.999256787 | 6 | 151629955 | 152376499 |
| dried-fruit-intake | PS | -0.489364 | -0.9765 | -0.13186 | 0.239477 | 0.01762 | 0.95355 | 0.00960561 | 0.234118823 | 6 | 152376500 | 153082361 |
| dried-fruit-intake | PS | -0.784887 | -1 | -0.14372 | 0.616048 | 0.02629 | 1 | 0.0212975 | 0.292402657 | 6 | 153082362 | 153791461 |
| dried-fruit-intake | PS | 0.155173 | -0.36535 | 0.7442 | 0.0240788 | 0 | 0.57393 | 0.521641 | 0.823281169 | 6 | 154462011 | 155523957 |
| dried-fruit-intake | PS | -0.0178828 | -0.41454 | 0.3727 | 0.000319795 | 0 | 0.21089 | 0.924129 | 0.979618732 | 6 | 155523958 | 156762740 |
| dried-fruit-intake | PS | -0.312131 | -0.75438 | 0.06186 | 0.0974256 | 0 | 0.56909 | 0.0979429 | 0.484668957 | 6 | 156762741 | 158220143 |
| dried-fruit-intake | PS | -0.0255213 | -0.56459 | 0.48284 | 0.000651337 | 0 | 0.39422 | 0.910902 | 0.977166335 | 6 | 161371015 | 162254229 |
| dried-fruit-intake | PS | 0.401626 | -0.11368 | 1 | 0.161303 | 0 | 1 | 0.119536 | 0.518850788 | 6 | 162254230 | 163336361 |
| dried-fruit-intake | PS | 0.27869 | -0.63291 | 1 | 0.0776679 | 0 | 1 | 0.468559 | 0.797038382 | 6 | 163336362 | 164687462 |
| dried-fruit-intake | PS | -0.004435 | -0.66407 | 0.62793 | 0.0000197 | 0 | 0.60858 | 0.986901 | 0.998059082 | 6 | 164687463 | 165835953 |
| dried-fruit-intake | PS | -0.695848 | -1 | -0.15834 | 0.484204 | 0.02735 | 1 | 0.0122059 | 0.257190125 | 6 | 165835954 | 166853325 |
| dried-fruit-intake | PS | 0.246506 | -0.25499 | 0.87424 | 0.0607652 | 0 | 0.77124 | 0.306856 | 0.689739639 | 6 | 168707339 | 169667886 |
| dried-fruit-intake | PS | -0.292342 | -0.80014 | 0.11068 | 0.0854641 | 0 | 0.64118 | 0.149804 | 0.55216732 | 6 | 169667887 | 171053405 |
| dried-fruit-intake | PS | -0.36524 | -1 | 0.25877 | 0.1334 | 0 | 1 | 0.230531 | 0.622398612 | 7 | 617320 | 1366972 |
| dried-fruit-intake | PS | -0.328086 | -0.71028 | -0.00423 | 0.10764 | 0.00147 | 0.5045 | 0.0428333 | 0.35870143 | 7 | 1366973 | 2473749 |
| dried-fruit-intake | PS | -0.0675588 | -0.43186 | 0.28783 | 0.00456419 | 0 | 0.19752 | 0.692498 | 0.902153358 | 7 | 2473750 | 3100211 |
| dried-fruit-intake | PS | -0.319091 | -0.99264 | 0.15921 | 0.101819 | 0 | 0.98533 | 0.179779 | 0.584237029 | 7 | 3100212 | 4139431 |
| dried-fruit-intake | PS | 0.0884857 | -0.28505 | 0.56204 | 0.00782971 | 0 | 0.34899 | 0.60192 | 0.859194646 | 7 | 4139432 | 4938442 |
| dried-fruit-intake | PS | 0.0149108 | -0.19973 | 0.23832 | 0.000222332 | 0 | 0.06397 | 0.882374 | 0.965761891 | 7 | 4938443 | 6020653 |
| dried-fruit-intake | PS | -0.117492 | -0.56208 | 0.24531 | 0.0138043 | 0 | 0.32702 | 0.485854 | 0.805062382 | 7 | 6020654 | 6716905 |
| dried-fruit-intake | PS | -0.428125 | -0.85951 | -0.09675 | 0.183291 | 0.00983 | 0.73875 | 0.0142869 | 0.269716852 | 7 | 6716906 | 7167610 |
| dried-fruit-intake | PS | -0.0323697 | -0.80131 | 0.67433 | 0.0010478 | 0 | 0.83599 | 0.912418 | 0.977166335 | 7 | 9225107 | 9900801 |
| dried-fruit-intake | PS | -0.642633 | -1 | 0.01351 | 0.412977 | 0 | 1 | 0.0579996 | 0.402808045 | 7 | 10481678 | 11232447 |
| dried-fruit-intake | PS | -0.2096 | -1 | 0.4057 | 0.043932 | 0 | 1 | 0.45611 | 0.790656151 | 7 | 16739014 | 17596578 |
| dried-fruit-intake | PS | -0.331223 | -1 | 0.56205 | 0.109709 | 0 | 1 | 0.408931 | 0.766733809 | 7 | 20122180 | 21390644 |
| dried-fruit-intake | PS | -0.31921 | -1 | 0.23025 | 0.101895 | 0 | 1 | 0.230817 | 0.622398612 | 7 | 21390645 | 22165060 |
| dried-fruit-intake | PS | -0.287456 | -1 | 0.27493 | 0.0826311 | 0 | 1 | 0.289737 | 0.675011382 | 7 | 23106681 | 24151099 |
| dried-fruit-intake | PS | -0.759324 | -1 | -0.23311 | 0.576573 | 0.05434 | 1 | 0.00593917 | 0.200879756 | 7 | 24151100 | 24894119 |
| dried-fruit-intake | PS | 0.235239 | -0.25192 | 0.83406 | 0.0553374 | 0 | 0.70383 | 0.321247 | 0.701801138 | 7 | 28890887 | 30175113 |
| dried-fruit-intake | PS | -0.134167 | -1 | 0.917 | 0.0180009 | 0 | 1 | 0.741215 | 0.920037908 | 7 | 33159278 | 34114532 |
| dried-fruit-intake | PS | 0.123214 | -0.18568 | 0.44251 | 0.0151817 | 0 | 0.19616 | 0.414666 | 0.767893591 | 7 | 36507691 | 37981936 |
| dried-fruit-intake | PS | 0.216656 | -0.32571 | 0.92329 | 0.04694 | 0 | 0.87711 | 0.403057 | 0.76222165 | 7 | 38966484 | 40261240 |
| dried-fruit-intake | PS | 0.016781 | -0.71392 | 0.7679 | 0.000281603 | 0 | 0.96435 | 0.953476 | 0.988457854 | 7 | 40261241 | 41415925 |
| dried-fruit-intake | PS | 0.113401 | -0.38938 | 0.66654 | 0.0128598 | 0 | 0.47237 | 0.631239 | 0.870590801 | 7 | 43448816 | 44989571 |
| dried-fruit-intake | PS | -0.161145 | -1 | 1 | 0.0259678 | 0 | 1 | 0.714102 | 0.906613519 | 7 | 44989572 | 46247335 |
| dried-fruit-intake | PS | 0.00764917 | -0.41804 | 0.43005 | 0.0000585 | 0 | 0.24513 | 0.969567 | 0.993719113 | 7 | 49632427 | 50894508 |
| dried-fruit-intake | PS | 0.172963 | -0.35696 | 0.80227 | 0.0299161 | 0 | 0.65956 | 0.481984 | 0.802193156 | 7 | 50894509 | 51951647 |
| dried-fruit-intake | PS | -0.000167558 | -0.59537 | 0.57098 | 2.81E-08 | 0 | 0.50009 | 0.999473 | 0.999874 | 7 | 54550501 | 55161394 |
| dried-fruit-intake | PS | -0.235258 | -0.76761 | 0.21648 | 0.0553465 | 0 | 0.58993 | 0.282879 | 0.668934463 | 7 | 55161395 | 56303513 |
| dried-fruit-intake | PS | -0.262971 | -1 | 0.47565 | 0.0691539 | 0 | 1 | 0.422808 | 0.769727385 | 7 | 68569225 | 70144614 |
| dried-fruit-intake | PS | -0.157906 | -0.80423 | 0.38655 | 0.0249344 | 0 | 0.67241 | 0.532419 | 0.831453034 | 7 | 70144615 | 71215741 |
| dried-fruit-intake | PS | -0.152395 | -0.84644 | 0.42743 | 0.0232244 | 0 | 0.75152 | 0.562225 | 0.845171061 | 7 | 75243900 | 76451928 |
| dried-fruit-intake | PS | -0.699818 | -1 | -0.15054 | 0.489746 | 0.02616 | 1 | 0.0155889 | 0.273599214 | 7 | 77663965 | 78685009 |
| dried-fruit-intake | PS | -0.287005 | -0.80585 | 0.14196 | 0.0823717 | 0 | 0.64992 | 0.174068 | 0.582296617 | 7 | 80055722 | 81533566 |
| dried-fruit-intake | PS | 0.291721 | -0.32067 | 1 | 0.0851011 | 0 | 1 | 0.300815 | 0.685716615 | 7 | 81533567 | 82759283 |
| dried-fruit-intake | PS | 0.135057 | -0.30939 | 0.62103 | 0.0182405 | 0 | 0.38974 | 0.526519 | 0.826925474 | 7 | 90660832 | 92530165 |
| dried-fruit-intake | PS | -0.370498 | -1 | 0.10188 | 0.137269 | 0 | 1 | 0.116976 | 0.516275157 | 7 | 92530166 | 93691725 |
| dried-fruit-intake | PS | -0.0321363 | -1 | 0.91315 | 0.00103274 | 0 | 1 | 0.92685 | 0.980084322 | 7 | 95174848 | 96564981 |
| dried-fruit-intake | PS | -0.396977 | -1 | 0.31608 | 0.157591 | 0 | 1 | 0.245134 | 0.635923145 | 7 | 97420208 | 98173564 |
| dried-fruit-intake | PS | -0.666801 | -1 | -0.20653 | 0.444624 | 0.04319 | 1 | 0.0058162 | 0.200879756 | 7 | 98173565 | 99465540 |
| dried-fruit-intake | PS | -0.0211978 | -0.76458 | 0.72566 | 0.000449347 | 0 | 0.97184 | 0.942085 | 0.986169747 | 7 | 100849308 | 101950748 |
| dried-fruit-intake | PS | -0.397256 | -1 | 0.2464 | 0.157812 | 0 | 1 | 0.200945 | 0.602877424 | 7 | 103191323 | 104109231 |
| dried-fruit-intake | PS | -0.496172 | -1 | 0.11853 | 0.246186 | 0 | 1 | 0.115785 | 0.516275157 | 7 | 109095559 | 110479479 |
| dried-fruit-intake | PS | 0.374551 | -0.17091 | 1 | 0.140288 | 0 | 1 | 0.173032 | 0.582296617 | 7 | 110479480 | 111795299 |
| dried-fruit-intake | PS | 0.0716823 | -0.42294 | 0.5832 | 0.00513835 | 0 | 0.37778 | 0.74999 | 0.922586569 | 7 | 113339387 | 115321301 |
| dried-fruit-intake | PS | -0.232614 | -0.77175 | 0.23187 | 0.0541093 | 0 | 0.59707 | 0.301995 | 0.686371378 | 7 | 115321302 | 116835336 |
| dried-fruit-intake | PS | 0.0213196 | -0.34829 | 0.39715 | 0.000454525 | 0 | 0.18671 | 0.905233 | 0.975080055 | 7 | 116835337 | 118342090 |
| dried-fruit-intake | PS | 0.27844 | -0.23997 | 0.95493 | 0.0775288 | 0 | 0.92264 | 0.266872 | 0.651484007 | 7 | 128779174 | 130418704 |
| dried-fruit-intake | PS | -0.393775 | -1 | 0.39662 | 0.155059 | 0 | 1 | 0.288459 | 0.675011382 | 7 | 130418705 | 131856481 |
| dried-fruit-intake | PS | -0.00635217 | -0.69563 | 0.65037 | 0.0000404 | 0 | 0.67465 | 0.98196 | 0.996292185 | 7 | 133807217 | 134943221 |
| dried-fruit-intake | PS | 0.0439136 | -0.32696 | 0.42094 | 0.00192841 | 0 | 0.19898 | 0.803219 | 0.941469324 | 7 | 134943222 | 136113467 |
| dried-fruit-intake | PS | -0.228576 | -0.85734 | 0.27103 | 0.0522469 | 0 | 0.74124 | 0.352128 | 0.727419385 | 7 | 137657460 | 138755107 |
| dried-fruit-intake | PS | 0.303139 | -0.25351 | 1 | 0.0918934 | 0 | 1 | 0.249245 | 0.637767702 | 7 | 138755108 | 140217630 |
| dried-fruit-intake | PS | -0.12256 | -0.89023 | 0.51472 | 0.0150209 | 0 | 0.90875 | 0.662933 | 0.891843705 | 7 | 140217631 | 142098979 |
| dried-fruit-intake | PS | 0.460095 | -0.37164 | 1 | 0.211688 | 0 | 1 | 0.237934 | 0.627193256 | 7 | 142098980 | 144324464 |
| dried-fruit-intake | PS | -0.145181 | -0.7677 | 0.38774 | 0.0210776 | 0 | 0.61797 | 0.556754 | 0.84420035 | 7 | 148622914 | 149842999 |
| dried-fruit-intake | PS | -0.593921 | -1 | -0.13329 | 0.352742 | 0.01939 | 1 | 0.0133741 | 0.265317787 | 7 | 152253295 | 153241228 |
| dried-fruit-intake | PS | -0.539654 | -1 | 0.12711 | 0.291226 | 0 | 1 | 0.10315 | 0.496571285 | 7 | 154407488 | 155280610 |
| dried-fruit-intake | PS | 0.153304 | -0.39539 | 0.80145 | 0.0235022 | 0 | 0.67573 | 0.557555 | 0.844402572 | 8 | 3386668 | 3787248 |
| dried-fruit-intake | PS | 0.408662 | -0.13434 | 1 | 0.167005 | 0 | 1 | 0.124297 | 0.529478987 | 8 | 4273084 | 4893120 |
| dried-fruit-intake | PS | -0.36895 | -1 | 0.11717 | 0.136124 | 0 | 1 | 0.131744 | 0.53799409 | 8 | 6019164 | 6663427 |
| dried-fruit-intake | PS | 0.553635 | -0.46425 | 1 | 0.306512 | 0 | 1 | 0.233803 | 0.622973542 | 8 | 13948096 | 14389305 |
| dried-fruit-intake | PS | 0.934342 | 0.18283 | 1 | 0.872994 | 0.04183 | 1 | 0.0198027 | 0.292402657 | 8 | 15999329 | 16988030 |
| dried-fruit-intake | PS | -0.259832 | -0.82033 | 0.19185 | 0.0675128 | 0 | 0.67373 | 0.249788 | 0.638347111 | 8 | 17947005 | 18668609 |
| dried-fruit-intake | PS | -0.459961 | -1 | 0.14242 | 0.211564 | 0 | 1 | 0.124762 | 0.529873462 | 8 | 21650454 | 22895018 |
| dried-fruit-intake | PS | -0.602213 | -1 | -0.10182 | 0.362661 | 0.01269 | 1 | 0.0212026 | 0.292402657 | 8 | 22895019 | 23788494 |
| dried-fruit-intake | PS | -0.497011 | -1 | 0.11755 | 0.24702 | 0 | 1 | 0.108457 | 0.507510235 | 8 | 23788495 | 24863243 |
| dried-fruit-intake | PS | -0.344635 | -1 | 0.16553 | 0.118773 | 0 | 1 | 0.170559 | 0.582296617 | 8 | 24863244 | 25859277 |
| dried-fruit-intake | PS | -0.58962 | -1 | -0.11205 | 0.347651 | 0.01549 | 1 | 0.0178683 | 0.283368889 | 8 | 25859278 | 26679135 |
| dried-fruit-intake | PS | -0.195796 | -0.78006 | 0.31483 | 0.0383362 | 0 | 0.61396 | 0.41102 | 0.76747083 | 8 | 27406512 | 28344176 |
| dried-fruit-intake | PS | -0.354244 | -1 | 0.45635 | 0.125489 | 0 | 1 | 0.342301 | 0.71676685 | 8 | 53108911 | 54119373 |
| dried-fruit-intake | PS | 0.338462 | -0.39647 | 1 | 0.114557 | 0 | 1 | 0.313955 | 0.695891758 | 8 | 54119374 | 55275354 |
| dried-fruit-intake | PS | -0.52904 | -1 | 0.47024 | 0.279884 | 0 | 1 | 0.243955 | 0.635037917 | 8 | 58675118 | 59555977 |
| dried-fruit-intake | PS | -0.50938 | -1 | -0.02206 | 0.259468 | 0.00426 | 1 | 0.0419043 | 0.35870143 | 8 | 61324890 | 62330900 |
| dried-fruit-intake | PS | -0.651284 | -1 | -0.24957 | 0.42417 | 0.06228 | 1 | 0.00298136 | 0.167709644 | 8 | 70004666 | 70872088 |
| dried-fruit-intake | PS | -0.260897 | -0.90015 | 0.25503 | 0.0680671 | 0 | 0.81209 | 0.301192 | 0.685716615 | 8 | 72917490 | 73838027 |
| dried-fruit-intake | PS | 0.373068 | -0.01895 | 0.87167 | 0.13918 | 0 | 0.75981 | 0.066256 | 0.426779407 | 8 | 73838028 | 75011699 |
| dried-fruit-intake | PS | 0.483513 | 0.01743 | 1 | 0.233785 | 0.00414 | 1 | 0.043229 | 0.360793635 | 8 | 77377990 | 78633659 |
| dried-fruit-intake | PS | -0.286807 | -0.95012 | 0.18023 | 0.0822585 | 0 | 0.90634 | 0.21793 | 0.615142653 | 8 | 81340232 | 82878769 |
| dried-fruit-intake | PS | -0.330256 | -0.85239 | 0.10959 | 0.109069 | 0 | 0.72658 | 0.136212 | 0.540048903 | 8 | 85116735 | 86251870 |
| dried-fruit-intake | PS | -0.522697 | -1 | 0.08876 | 0.273213 | 0 | 1 | 0.0915539 | 0.479791573 | 8 | 86251871 | 87563145 |
| dried-fruit-intake | PS | -0.151587 | -1 | 0.5032 | 0.0229786 | 0 | 1 | 0.604598 | 0.860368673 | 8 | 92876621 | 94999066 |
| dried-fruit-intake | PS | -0.424627 | -1 | 0.2158 | 0.180308 | 0 | 1 | 0.169113 | 0.581392693 | 8 | 96175631 | 96900513 |
| dried-fruit-intake | PS | -0.368642 | -0.96574 | 0.06279 | 0.135897 | 0 | 0.93308 | 0.0934863 | 0.482879102 | 8 | 96900514 | 98132519 |
| dried-fruit-intake | PS | -0.200515 | -0.87116 | 0.31666 | 0.0402064 | 0 | 0.79051 | 0.409379 | 0.767086526 | 8 | 101448440 | 102548680 |
| dried-fruit-intake | PS | 0.843942 | 0.17944 | 1 | 0.712238 | 0.03695 | 1 | 0.013588 | 0.265317787 | 8 | 102548681 | 103716053 |
| dried-fruit-intake | PS | 1 | 0.25145 | 1 | 1 | 0.0694 | 1 | 0.0115448 | 0.251698291 | 8 | 104467846 | 105370130 |
| dried-fruit-intake | PS | 0.0591401 | -0.5043 | 0.65668 | 0.00349755 | 0 | 0.55327 | 0.806498 | 0.942405176 | 8 | 105370131 | 106500950 |
| dried-fruit-intake | PS | -0.0264001 | -0.65704 | 0.57914 | 0.000696964 | 0 | 0.56604 | 0.921352 | 0.978712749 | 8 | 106500951 | 107787163 |
| dried-fruit-intake | PS | -0.262353 | -0.77502 | 0.16425 | 0.0688292 | 0 | 0.60136 | 0.208853 | 0.606076286 | 8 | 118300069 | 119423298 |
| dried-fruit-intake | PS | -0.433241 | -1 | 0.29909 | 0.187698 | 0 | 1 | 0.202289 | 0.602877424 | 8 | 119423299 | 120216587 |
| dried-fruit-intake | PS | -0.126641 | -0.96097 | 0.54291 | 0.0160381 | 0 | 0.9971 | 0.669686 | 0.89492409 | 8 | 126766828 | 128073654 |
| dried-fruit-intake | PS | 0.186096 | -0.29283 | 0.74721 | 0.0346316 | 0 | 0.56457 | 0.415097 | 0.767893591 | 8 | 129291119 | 130383563 |
| dried-fruit-intake | PS | -0.682701 | -1 | -0.09337 | 0.466081 | 0.01376 | 1 | 0.0267969 | 0.305371 | 8 | 135313674 | 136220342 |
| dried-fruit-intake | PS | -0.187044 | -0.61737 | 0.19782 | 0.0349854 | 0 | 0.38451 | 0.327124 | 0.706605148 | 8 | 138564844 | 139404631 |
| dried-fruit-intake | PS | -0.572393 | -1 | -0.06169 | 0.327633 | 0.00812 | 1 | 0.0289248 | 0.316086746 | 8 | 140355989 | 141527881 |
| dried-fruit-intake | PS | -0.161926 | -0.62636 | 0.24666 | 0.02622 | 0 | 0.39378 | 0.415458 | 0.767893591 | 8 | 142611890 | 143611461 |
| dried-fruit-intake | PS | 0.8554 | 0.2322 | 1 | 0.731709 | 0.05566 | 1 | 0.0105818 | 0.2442899 | 8 | 144934289 | 146303787 |
| dried-fruit-intake | PS | -0.076405 | -0.72583 | 0.49097 | 0.00583772 | 0 | 0.60141 | 0.770444 | 0.92959111 | 9 | 653662 | 1103598 |
| dried-fruit-intake | PS | -0.0660009 | -0.97901 | 0.77466 | 0.00435611 | 0 | 1 | 0.840521 | 0.949371541 | 9 | 1103599 | 1874961 |
| dried-fruit-intake | PS | 0.0700147 | -0.98655 | 1 | 0.00490206 | 0 | 1 | 0.856048 | 0.955614217 | 9 | 1874962 | 2441120 |
| dried-fruit-intake | PS | -0.340493 | -1 | 0.3278 | 0.115935 | 0 | 1 | 0.283428 | 0.6689896 | 9 | 4025356 | 4596614 |
| dried-fruit-intake | PS | -0.465969 | -1 | 0.11241 | 0.217127 | 0 | 1 | 0.119961 | 0.518850788 | 9 | 7388203 | 8262303 |
| dried-fruit-intake | PS | -0.422238 | -0.98482 | -0.00063 | 0.178285 | 0.00221 | 0.96986 | 0.0473875 | 0.369827342 | 9 | 13512853 | 14244747 |
| dried-fruit-intake | PS | 0.19793 | -0.3149 | 0.78505 | 0.0391763 | 0 | 0.63247 | 0.40588 | 0.764274119 | 9 | 14902925 | 15839403 |
| dried-fruit-intake | PS | -0.152415 | -0.73974 | 0.33418 | 0.0232304 | 0 | 0.56408 | 0.514344 | 0.822603387 | 9 | 16658378 | 17392382 |
| dried-fruit-intake | PS | -0.254272 | -1 | 0.76696 | 0.0646543 | 0 | 1 | 0.546477 | 0.841727194 | 9 | 18754197 | 19463292 |
| dried-fruit-intake | PS | -0.909793 | -1 | -0.31843 | 0.827723 | 0.10167 | 1 | 0.00421524 | 0.178799682 | 9 | 19463293 | 20483880 |
| dried-fruit-intake | PS | -0.313753 | -0.74758 | 0.05537 | 0.0984411 | 0 | 0.55888 | 0.0896775 | 0.478016906 | 9 | 21674033 | 23091193 |
| dried-fruit-intake | PS | -0.175399 | -0.78399 | 0.30436 | 0.0307649 | 0 | 0.62863 | 0.440699 | 0.779698231 | 9 | 23091194 | 23859374 |
| dried-fruit-intake | PS | -0.156581 | -1 | 0.80182 | 0.0245176 | 0 | 1 | 0.684835 | 0.900136915 | 9 | 28067455 | 28766060 |
| dried-fruit-intake | PS | -0.354831 | -1 | 0.60219 | 0.125905 | 0 | 1 | 0.3973 | 0.756176066 | 9 | 29596502 | 30410078 |
| dried-fruit-intake | PS | -0.3842 | -1 | 0.27794 | 0.14761 | 0 | 1 | 0.234031 | 0.622973542 | 9 | 30410079 | 31115153 |
| dried-fruit-intake | PS | -0.0300207 | -0.62911 | 0.53633 | 0.000901244 | 0 | 0.50104 | 0.906711 | 0.975080055 | 9 | 32253284 | 33194892 |
| dried-fruit-intake | PS | 0.464925 | -0.09218 | 1 | 0.216155 | 0 | 1 | 0.0948942 | 0.482879102 | 9 | 34704545 | 36749273 |
| dried-fruit-intake | PS | -0.0348213 | -0.64254 | 0.53261 | 0.00121252 | 0 | 0.56459 | 0.886313 | 0.968450404 | 9 | 72288879 | 73915494 |
| dried-fruit-intake | PS | 0.00886325 | -0.59701 | 0.60961 | 0.0000786 | 0 | 0.58259 | 0.971508 | 0.993719113 | 9 | 73915495 | 74950318 |
| dried-fruit-intake | PS | -0.368902 | -0.90031 | 0.03534 | 0.136089 | 0 | 0.81055 | 0.0809085 | 0.460358212 | 9 | 76197745 | 77862308 |
| dried-fruit-intake | PS | -0.0698347 | -0.61949 | 0.44431 | 0.00487689 | 0 | 0.45692 | 0.755921 | 0.923275238 | 9 | 81161598 | 82601465 |
| dried-fruit-intake | PS | 0.466703 | -0.05351 | 1 | 0.217812 | 0 | 1 | 0.0785527 | 0.457283004 | 9 | 85135752 | 86769886 |
| dried-fruit-intake | PS | -0.348601 | -1 | 0.47561 | 0.121523 | 0 | 1 | 0.340763 | 0.716609936 | 9 | 98885863 | 100310517 |
| dried-fruit-intake | PS | -0.22609 | -1 | 0.44999 | 0.0511166 | 0 | 1 | 0.458526 | 0.792521685 | 9 | 100310518 | 101596750 |
| dried-fruit-intake | PS | 0.119154 | -0.46082 | 0.77533 | 0.0141977 | 0 | 0.64216 | 0.640873 | 0.875404106 | 9 | 104222849 | 105043411 |
| dried-fruit-intake | PS | -0.148377 | -0.45039 | 0.13934 | 0.0220158 | 0 | 0.20285 | 0.301287 | 0.685716615 | 9 | 109150718 | 110630150 |
| dried-fruit-intake | PS | 0.0444986 | -0.66289 | 0.76356 | 0.00198013 | 0 | 0.77045 | 0.8748 | 0.962309464 | 9 | 112076382 | 112865520 |
| dried-fruit-intake | PS | -0.230542 | -0.99111 | 0.34785 | 0.0531495 | 0 | 0.99142 | 0.39563 | 0.756176066 | 9 | 113646150 | 114443475 |
| dried-fruit-intake | PS | 0.215987 | -0.61339 | 1 | 0.0466505 | 0 | 1 | 0.531493 | 0.830884464 | 9 | 114443476 | 115390112 |
| dried-fruit-intake | PS | -0.604017 | -1 | -0.09175 | 0.364837 | 0.01309 | 1 | 0.0249255 | 0.305371 | 9 | 115390113 | 116159540 |
| dried-fruit-intake | PS | 0.255023 | -0.45091 | 1 | 0.065037 | 0 | 1 | 0.435391 | 0.775347332 | 9 | 116159541 | 117054909 |
| dried-fruit-intake | PS | -0.0579426 | -0.71922 | 0.57044 | 0.00335735 | 0 | 0.62852 | 0.827745 | 0.945911536 | 9 | 117054910 | 117989017 |
| dried-fruit-intake | PS | 0.457109 | -0.12676 | 1 | 0.208948 | 0 | 1 | 0.127832 | 0.532778211 | 9 | 117989018 | 119001227 |
| dried-fruit-intake | PS | -1 | -1 | -0.30337 | 1 | 0.09329 | 1 | 0.0028167 | 0.167260767 | 9 | 119890465 | 121008529 |
| dried-fruit-intake | PS | 0.574327 | 0.10043 | 1 | 0.329851 | 0.01305 | 1 | 0.0194359 | 0.292402657 | 9 | 126092932 | 127184582 |
| dried-fruit-intake | PS | 0.14823 | -0.29418 | 0.6319 | 0.0219722 | 0 | 0.40574 | 0.480419 | 0.801459386 | 9 | 128785783 | 129617771 |
| dried-fruit-intake | PS | 0.637532 | 0.13801 | 1 | 0.406447 | 0.02087 | 1 | 0.0144864 | 0.270357614 | 9 | 129617772 | 130902727 |
| dried-fruit-intake | PS | -0.283822 | -0.94457 | 0.2145 | 0.0805547 | 0 | 0.89666 | 0.253695 | 0.640696318 | 9 | 130902728 | 132193798 |
| dried-fruit-intake | PS | -0.336286 | -0.90301 | 0.09159 | 0.113088 | 0 | 0.81543 | 0.126163 | 0.529965172 | 9 | 132193799 | 132999452 |
| dried-fruit-intake | PS | 0.235505 | -0.10942 | 0.61974 | 0.0554627 | 0 | 0.38469 | 0.177339 | 0.582296617 | 9 | 136042491 | 136770926 |
| dried-fruit-intake | PS | -0.523543 | -1 | -0.04749 | 0.274097 | 0.00618 | 1 | 0.036873 | 0.35091556 | 9 | 136770927 | 137593527 |
| dried-fruit-intake | PS | -0.147674 | -0.72908 | 0.34102 | 0.0218076 | 0 | 0.54753 | 0.532578 | 0.831453034 | 9 | 138202113 | 138995791 |
| dried-fruit-intake | PS | 0.00172698 | -0.41302 | 0.42015 | 0.00000298 | 0 | 0.23499 | 0.992869 | 0.998435708 | 9 | 138995792 | 140097759 |
| dried-fruit-intake | PS | 0.091462 | -0.30741 | 0.51194 | 0.00836529 | 0 | 0.27143 | 0.637564 | 0.873870499 | 9 | 140097760 | 141146682 |
| dried-fruit-intake | PS | 0.00139754 | -1 | 1 | 0.00000195 | 0 | 1 | 0.997138 | 0.999256787 | 10 | 1872961 | 2637065 |
| dried-fruit-intake | PS | 0.241549 | -0.44747 | 1 | 0.0583457 | 0 | 1 | 0.429025 | 0.772599009 | 10 | 3225337 | 3880322 |
| dried-fruit-intake | PS | -0.060156 | -0.67444 | 0.53269 | 0.00361875 | 0 | 0.55508 | 0.81442 | 0.944542385 | 10 | 3880323 | 4813182 |
| dried-fruit-intake | PS | -0.0556472 | -0.46399 | 0.32975 | 0.00309661 | 0 | 0.23225 | 0.76721 | 0.928727895 | 10 | 5396243 | 6234718 |
| dried-fruit-intake | PS | 0.0115447 | -0.57056 | 0.60414 | 0.00013328 | 0 | 0.52877 | 0.961651 | 0.991317435 | 10 | 6234719 | 6897037 |
| dried-fruit-intake | PS | 0.226779 | -0.20293 | 0.70504 | 0.0514287 | 0 | 0.4976 | 0.268749 | 0.653020309 | 10 | 6897038 | 7659872 |
| dried-fruit-intake | PS | -0.204946 | -0.70822 | 0.20904 | 0.0420029 | 0 | 0.50228 | 0.327078 | 0.706605148 | 10 | 7659873 | 8771920 |
| dried-fruit-intake | PS | 0.297655 | -0.55541 | 1 | 0.0885986 | 0 | 1 | 0.41551 | 0.767893591 | 10 | 8771921 | 10081279 |
| dried-fruit-intake | PS | 0.724347 | 0.11876 | 1 | 0.524678 | 0.01965 | 1 | 0.0232834 | 0.301760256 | 10 | 10081280 | 10969481 |
| dried-fruit-intake | PS | -1 | -1 | -0.25775 | 1 | 0.07081 | 1 | 0.00672448 | 0.203353256 | 10 | 12581572 | 13208061 |
| dried-fruit-intake | PS | -0.0989305 | -1 | 0.7817 | 0.00978724 | 0 | 1 | 0.776453 | 0.929934281 | 10 | 13208062 | 14008135 |
| dried-fruit-intake | PS | 0.0454952 | -0.6233 | 0.75162 | 0.00206982 | 0 | 0.81529 | 0.869229 | 0.95941261 | 10 | 15946678 | 17065860 |
| dried-fruit-intake | PS | 0.372324 | -0.23121 | 1 | 0.138625 | 0 | 1 | 0.19972 | 0.602877424 | 10 | 20616433 | 21477692 |
| dried-fruit-intake | PS | 0.0187813 | -0.6689 | 0.68286 | 0.000352736 | 0 | 0.74087 | 0.944579 | 0.986850048 | 10 | 23365686 | 24489447 |
| dried-fruit-intake | PS | -0.265861 | -1 | 0.40705 | 0.0706823 | 0 | 1 | 0.390931 | 0.754395872 | 10 | 30919470 | 32457293 |
| dried-fruit-intake | PS | 0.315644 | -0.03219 | 0.71429 | 0.0996309 | 0 | 0.51021 | 0.0755446 | 0.451883999 | 10 | 33655459 | 35178224 |
| dried-fruit-intake | PS | -0.258727 | -0.77084 | 0.17721 | 0.0669399 | 0 | 0.59511 | 0.231715 | 0.622398612 | 10 | 36475839 | 37561443 |
| dried-fruit-intake | PS | -0.680573 | -1 | -0.0399 | 0.463179 | 0.00872 | 1 | 0.0396625 | 0.353293098 | 10 | 43769843 | 44893846 |
| dried-fruit-intake | PS | -0.78326 | -1 | -0.1606 | 0.613497 | 0.03094 | 1 | 0.0165923 | 0.280108322 | 10 | 46327145 | 49197320 |
| dried-fruit-intake | PS | 0.534591 | 0.16501 | 0.99085 | 0.285788 | 0.02725 | 0.98179 | 0.00597834 | 0.200879756 | 10 | 53129610 | 53919161 |
| dried-fruit-intake | PS | -0.239821 | -0.94898 | 0.29948 | 0.057514 | 0 | 0.918 | 0.353226 | 0.729226369 | 10 | 55867695 | 57044845 |
| dried-fruit-intake | PS | 0.387083 | -0.72962 | 1 | 0.149833 | 0 | 1 | 0.403852 | 0.762464775 | 10 | 57955672 | 58809133 |
| dried-fruit-intake | PS | 0.385513 | -0.47956 | 1 | 0.14862 | 0 | 1 | 0.313535 | 0.695891758 | 10 | 62626466 | 64069687 |
| dried-fruit-intake | PS | 0.353418 | -0.05988 | 0.89623 | 0.124904 | 0 | 0.8049 | 0.0982554 | 0.484835727 | 10 | 64069688 | 65400431 |
| dried-fruit-intake | PS | 0.612598 | 0.10277 | 1 | 0.375276 | 0.01422 | 1 | 0.0213079 | 0.292402657 | 10 | 65400432 | 66510387 |
| dried-fruit-intake | PS | 0.631915 | -0.10147 | 1 | 0.399316 | 0 | 1 | 0.090252 | 0.478016906 | 10 | 67146044 | 67769822 |
| dried-fruit-intake | PS | -0.467396 | -1 | 0.03876 | 0.218459 | 0 | 1 | 0.0665326 | 0.426906624 | 10 | 69904171 | 71050504 |
| dried-fruit-intake | PS | -0.249071 | -0.96071 | 0.26946 | 0.0620365 | 0 | 0.94575 | 0.320884 | 0.701477339 | 10 | 72659224 | 73514214 |
| dried-fruit-intake | PS | 0.183475 | -0.32823 | 0.79763 | 0.0336629 | 0 | 0.64551 | 0.443903 | 0.782424675 | 10 | 78665482 | 79952996 |
| dried-fruit-intake | PS | -0.520055 | -0.89422 | -0.22653 | 0.270457 | 0.05138 | 0.79962 | 0.000868006 | 0.114010965 | 10 | 79952997 | 81190573 |
| dried-fruit-intake | PS | 0.242081 | -0.30524 | 0.9369 | 0.0586034 | 0 | 0.8906 | 0.342738 | 0.71676685 | 10 | 83596351 | 84679429 |
| dried-fruit-intake | PS | 0.298184 | -0.74888 | 1 | 0.088914 | 0 | 1 | 0.471658 | 0.797472807 | 10 | 84679430 | 85463484 |
| dried-fruit-intake | PS | -0.258029 | -0.83469 | 0.19447 | 0.0665792 | 0 | 0.70081 | 0.241403 | 0.632762599 | 10 | 88443653 | 89971628 |
| dried-fruit-intake | PS | -0.112027 | -0.68717 | 0.38324 | 0.0125501 | 0 | 0.51165 | 0.61602 | 0.863856299 | 10 | 89971629 | 91021321 |
| dried-fruit-intake | PS | -0.548495 | -1 | -0.00847 | 0.300847 | 0.00441 | 1 | 0.0493151 | 0.374565387 | 10 | 98005995 | 99367800 |
| dried-fruit-intake | PS | 0.688128 | 0.03462 | 1 | 0.47352 | 0.01075 | 1 | 0.0376275 | 0.351281893 | 10 | 99367801 | 100337830 |
| dried-fruit-intake | PS | 0.121467 | -0.61372 | 0.97213 | 0.0147543 | 0 | 1 | 0.69301 | 0.902460391 | 10 | 101271452 | 102509298 |
| dried-fruit-intake | PS | -0.217602 | -0.85159 | 0.23846 | 0.0473508 | 0 | 0.73287 | 0.317832 | 0.697286616 | 10 | 102509299 | 104206837 |
| dried-fruit-intake | PS | 0.127158 | -0.22307 | 0.51025 | 0.0161693 | 0 | 0.26056 | 0.470249 | 0.797472807 | 10 | 104206838 | 106142283 |
| dried-fruit-intake | PS | 0.228521 | -0.81595 | 1 | 0.0522219 | 0 | 1 | 0.570057 | 0.848976818 | 10 | 107877788 | 108725997 |
| dried-fruit-intake | PS | 0.183395 | -0.65141 | 1 | 0.0336335 | 0 | 1 | 0.59008 | 0.855475038 | 10 | 108725998 | 109579149 |
| dried-fruit-intake | PS | -0.00852139 | -0.87059 | 0.80156 | 0.0000726 | 0 | 1 | 0.978721 | 0.996292185 | 10 | 112164982 | 113117615 |
| dried-fruit-intake | PS | 0.21015 | -0.1657 | 0.63866 | 0.044163 | 0 | 0.40788 | 0.263368 | 0.648292399 | 10 | 114255955 | 115588903 |
| dried-fruit-intake | PS | 0.471595 | -0.28624 | 1 | 0.222402 | 0 | 1 | 0.184977 | 0.58904054 | 10 | 119528731 | 120592839 |
| dried-fruit-intake | PS | 0.115684 | -0.3834 | 0.63357 | 0.0133828 | 0 | 0.42641 | 0.610246 | 0.861631208 | 10 | 120592840 | 121874445 |
| dried-fruit-intake | PS | -0.340376 | -1 | 0.35633 | 0.115856 | 0 | 1 | 0.29437 | 0.677856 | 10 | 121874446 | 122803506 |
| dried-fruit-intake | PS | -0.34094 | -1 | 0.14452 | 0.11624 | 0 | 1 | 0.159803 | 0.572905157 | 10 | 124894143 | 125798319 |
| dried-fruit-intake | PS | -0.684417 | -1 | -0.22477 | 0.468426 | 0.05052 | 1 | 0.00447037 | 0.180249734 | 10 | 126875817 | 127997708 |
| dried-fruit-intake | PS | 0.29002 | -0.55063 | 1 | 0.0841114 | 0 | 1 | 0.428721 | 0.772599009 | 10 | 127997709 | 129134738 |
| dried-fruit-intake | PS | -0.811056 | -1 | -0.24187 | 0.657812 | 0.05906 | 1 | 0.00763108 | 0.208730332 | 10 | 130694009 | 131694738 |
| dried-fruit-intake | PS | 0.189305 | -0.39612 | 0.88233 | 0.0358365 | 0 | 0.80808 | 0.471748 | 0.797472807 | 10 | 133111171 | 133818036 |
| dried-fruit-intake | PS | -0.0475747 | -0.92305 | 0.71825 | 0.00226335 | 0 | 1 | 0.881184 | 0.965761891 | 11 | 1857846 | 2477449 |
| dried-fruit-intake | PS | -0.295834 | -1 | 0.42529 | 0.087518 | 0 | 1 | 0.360576 | 0.73602576 | 11 | 3362509 | 4405707 |
| dried-fruit-intake | PS | -0.160741 | -1 | 0.88029 | 0.0258377 | 0 | 1 | 0.689317 | 0.900892552 | 11 | 4405708 | 4946051 |
| dried-fruit-intake | PS | -0.234773 | -1 | 0.39338 | 0.0551185 | 0 | 1 | 0.413069 | 0.767893591 | 11 | 4946052 | 5533057 |
| dried-fruit-intake | PS | 0.112635 | -0.57863 | 0.89565 | 0.0126867 | 0 | 0.92763 | 0.705747 | 0.904676873 | 11 | 5533058 | 6180840 |
| dried-fruit-intake | PS | -0.137425 | -0.87743 | 0.50441 | 0.0188856 | 0 | 0.84897 | 0.622547 | 0.868534174 | 11 | 6180841 | 7191230 |
| dried-fruit-intake | PS | 0.0740771 | -0.77773 | 0.97982 | 0.00548741 | 0 | 1 | 0.816548 | 0.944542385 | 11 | 7191231 | 7915071 |
| dried-fruit-intake | PS | 0.0811301 | -0.3912 | 0.57645 | 0.00658209 | 0 | 0.35315 | 0.716251 | 0.906613519 | 11 | 10370101 | 11081299 |
| dried-fruit-intake | PS | 0.737666 | 0.21049 | 1 | 0.544151 | 0.04608 | 1 | 0.0108817 | 0.248528897 | 11 | 11632651 | 12470449 |
| dried-fruit-intake | PS | 0.313367 | -0.53883 | 1 | 0.0981991 | 0 | 1 | 0.396518 | 0.756176066 | 11 | 12470450 | 13364727 |
| dried-fruit-intake | PS | -0.588952 | -1 | -0.02326 | 0.346865 | 0.00589 | 1 | 0.0427994 | 0.35870143 | 11 | 18740268 | 19780784 |
| dried-fruit-intake | PS | -1 | -1 | -0.46607 | 1 | 0.21722 | 1 | 0.0000531 | 0.032617075 | 11 | 19780785 | 20686336 |
| dried-fruit-intake | PS | 0.544541 | 0.07409 | 1 | 0.296525 | 0.00848 | 1 | 0.0286258 | 0.315850888 | 11 | 21442723 | 22368743 |
| dried-fruit-intake | PS | 0.301254 | -0.65511 | 1 | 0.0907541 | 0 | 1 | 0.450589 | 0.786475108 | 11 | 25662919 | 26356980 |
| dried-fruit-intake | PS | -0.381045 | -1 | 0.62813 | 0.145196 | 0 | 1 | 0.386294 | 0.751421205 | 11 | 26356981 | 27018307 |
| dried-fruit-intake | PS | 0.144689 | -0.57121 | 1 | 0.0209349 | 0 | 1 | 0.646199 | 0.880837201 | 11 | 27018308 | 28577718 |
| dried-fruit-intake | PS | -0.166589 | -0.78747 | 0.34678 | 0.027752 | 0 | 0.64346 | 0.486501 | 0.805062382 | 11 | 32065772 | 32830422 |
| dried-fruit-intake | PS | -0.0322276 | -0.41377 | 0.34047 | 0.00103862 | 0 | 0.19526 | 0.858111 | 0.955823351 | 11 | 32830423 | 33905327 |
| dried-fruit-intake | PS | -0.546463 | -1 | 0.02102 | 0.298622 | 0 | 1 | 0.0653576 | 0.424369625 | 11 | 33905328 | 34672697 |
| dried-fruit-intake | PS | 0.0232762 | -0.52746 | 0.61039 | 0.000541781 | 0 | 0.49911 | 0.921562 | 0.978712749 | 11 | 35500368 | 36331189 |
| dried-fruit-intake | PS | -0.0184398 | -0.6913 | 0.65273 | 0.000340025 | 0 | 0.67127 | 0.946925 | 0.98795147 | 11 | 39329141 | 40362940 |
| dried-fruit-intake | PS | -0.227812 | -1 | 0.45388 | 0.0518981 | 0 | 1 | 0.460847 | 0.793255992 | 11 | 40362941 | 41603195 |
| dried-fruit-intake | PS | 0.213002 | -0.19702 | 0.66654 | 0.0453698 | 0 | 0.44824 | 0.288924 | 0.675011382 | 11 | 42858198 | 43949377 |
| dried-fruit-intake | PS | -0.206499 | -0.80941 | 0.29534 | 0.0426418 | 0 | 0.66247 | 0.385546 | 0.751421205 | 11 | 43949378 | 45019559 |
| dried-fruit-intake | PS | -0.116667 | -0.72473 | 0.38985 | 0.0136111 | 0 | 0.55708 | 0.623653 | 0.868930667 | 11 | 45019560 | 46316005 |
| dried-fruit-intake | PS | -0.705752 | -1 | 0.06776 | 0.498086 | 0 | 1 | 0.0786874 | 0.457283004 | 11 | 48765367 | 49386071 |
| dried-fruit-intake | PS | -0.63166 | -1 | 0.07031 | 0.398995 | 0 | 1 | 0.0759674 | 0.452754614 | 11 | 50217009 | 51098366 |
| dried-fruit-intake | PS | -0.406571 | -1 | 0.38817 | 0.1653 | 0 | 1 | 0.270921 | 0.654942995 | 11 | 51581596 | 55477633 |
| dried-fruit-intake | PS | -0.28862 | -1 | 0.5579 | 0.0833017 | 0 | 1 | 0.44947 | 0.7857996 | 11 | 55477634 | 55947452 |
| dried-fruit-intake | PS | -0.208599 | -0.55945 | 0.10992 | 0.0435136 | 0 | 0.31316 | 0.191607 | 0.596557161 | 11 | 60515106 | 61717117 |
| dried-fruit-intake | PS | -0.0174926 | -0.71994 | 0.63993 | 0.00030599 | 0 | 0.68209 | 0.949232 | 0.98795147 | 11 | 61717118 | 62800368 |
| dried-fruit-intake | PS | -0.256735 | -0.86488 | 0.2329 | 0.0659131 | 0 | 0.75344 | 0.281597 | 0.668383577 | 11 | 62800369 | 64594822 |
| dried-fruit-intake | PS | -0.495503 | -0.75915 | -0.25442 | 0.245523 | 0.06473 | 0.57631 | 0.0000945 | 0.038582156 | 11 | 64594823 | 66782661 |
| dried-fruit-intake | PS | -0.468328 | -0.79393 | -0.19503 | 0.219331 | 0.03804 | 0.63033 | 0.00153831 | 0.127235394 | 11 | 66782662 | 68000949 |
| dried-fruit-intake | PS | -0.495515 | -1 | 0.05563 | 0.245535 | 0 | 1 | 0.0746466 | 0.450639179 | 11 | 68000950 | 68887344 |
| dried-fruit-intake | PS | -0.0769544 | -0.62518 | 0.43831 | 0.00592198 | 0 | 0.43425 | 0.746109 | 0.921979566 | 11 | 68887345 | 69713996 |
| dried-fruit-intake | PS | 0.00263016 | -0.48669 | 0.49858 | 0.00000692 | 0 | 0.37456 | 0.990192 | 0.998310357 | 11 | 71242835 | 72875068 |
| dried-fruit-intake | PS | 0.171974 | -0.4891 | 0.97887 | 0.029575 | 0 | 1 | 0.543313 | 0.838940829 | 11 | 75445254 | 76518906 |
| dried-fruit-intake | PS | 0.036486 | -0.38461 | 0.46703 | 0.00133122 | 0 | 0.2521 | 0.852146 | 0.955373322 | 11 | 78912253 | 79802286 |
| dried-fruit-intake | PS | -0.105469 | -0.45487 | 0.23357 | 0.0111237 | 0 | 0.21059 | 0.521937 | 0.823281169 | 11 | 79802287 | 80726012 |
| dried-fruit-intake | PS | -0.117885 | -0.77162 | 0.48629 | 0.0138969 | 0 | 0.64673 | 0.659091 | 0.890236231 | 11 | 80726013 | 81658298 |
| dried-fruit-intake | PS | -0.286961 | -1 | 0.40567 | 0.0823464 | 0 | 1 | 0.373171 | 0.744263178 | 11 | 86629334 | 87676870 |
| dried-fruit-intake | PS | -0.388468 | -1 | 0.42312 | 0.150907 | 0 | 1 | 0.305476 | 0.688484504 | 11 | 90967062 | 92209168 |
| dried-fruit-intake | PS | -0.592263 | -1 | 0.15643 | 0.350776 | 0 | 1 | 0.109468 | 0.508421114 | 11 | 93576642 | 94384535 |
| dried-fruit-intake | PS | -0.722598 | -1 | -0.09001 | 0.522148 | 0.01511 | 1 | 0.0267476 | 0.305371 | 11 | 94384536 | 95327210 |
| dried-fruit-intake | PS | 0.124205 | -0.34206 | 0.61466 | 0.015427 | 0 | 0.3885 | 0.566785 | 0.84703292 | 11 | 95327211 | 96150134 |
| dried-fruit-intake | PS | 0.173141 | -0.4149 | 0.8576 | 0.0299777 | 0 | 0.76042 | 0.514545 | 0.822603387 | 11 | 98929381 | 99619347 |
| dried-fruit-intake | PS | 0.00154664 | -1 | 1 | 0.00000239 | 0 | 1 | 0.99657 | 0.999256787 | 11 | 99619348 | 100423901 |
| dried-fruit-intake | PS | -0.0690524 | -1 | 0.84754 | 0.00476824 | 0 | 1 | 0.843117 | 0.95086581 | 11 | 100423902 | 101152831 |
| dried-fruit-intake | PS | 0.372448 | -0.20933 | 1 | 0.138718 | 0 | 1 | 0.194182 | 0.599431391 | 11 | 101881253 | 102671665 |
| dried-fruit-intake | PS | 0.098745 | -0.68197 | 0.97069 | 0.00975058 | 0 | 1 | 0.758374 | 0.925233278 | 11 | 105932283 | 107054024 |
| dried-fruit-intake | PS | 0.265048 | -0.16312 | 0.79227 | 0.0702503 | 0 | 0.62789 | 0.213692 | 0.610690702 | 11 | 109891838 | 111117780 |
| dried-fruit-intake | PS | 0.0351172 | -0.36828 | 0.44816 | 0.00123322 | 0 | 0.22617 | 0.854408 | 0.955614217 | 11 | 111117781 | 112755446 |
| dried-fruit-intake | PS | 0.108022 | -0.31542 | 0.57241 | 0.0116689 | 0 | 0.3397 | 0.59971 | 0.85844563 | 11 | 112755447 | 113889019 |
| dried-fruit-intake | PS | 0.0588909 | -0.49719 | 0.6406 | 0.00346813 | 0 | 0.49181 | 0.808657 | 0.942903878 | 11 | 113889020 | 114742317 |
| dried-fruit-intake | PS | -0.834316 | -1 | -0.2419 | 0.696082 | 0.0611 | 1 | 0.00745179 | 0.206250391 | 11 | 114742318 | 116247377 |
| dried-fruit-intake | PS | 0.101148 | -0.80261 | 1 | 0.0102309 | 0 | 1 | 0.770775 | 0.92959111 | 11 | 118901214 | 120064528 |
| dried-fruit-intake | PS | 0.0564874 | -0.3568 | 0.48495 | 0.00319083 | 0 | 0.26402 | 0.773097 | 0.92959111 | 11 | 120064529 | 121208186 |
| dried-fruit-intake | PS | -0.579178 | -1 | -0.13145 | 0.335447 | 0.01864 | 1 | 0.0130735 | 0.26371942 | 11 | 121208187 | 122589224 |
| dried-fruit-intake | PS | -0.519376 | -1 | -0.10871 | 0.269751 | 0.01329 | 1 | 0.0152638 | 0.273599214 | 11 | 122589225 | 123398882 |
| dried-fruit-intake | PS | 0.359685 | -0.29912 | 1 | 0.129373 | 0 | 1 | 0.256145 | 0.643621228 | 11 | 123398883 | 124403477 |
| dried-fruit-intake | PS | 0.0185173 | -0.46019 | 0.48501 | 0.000342892 | 0 | 0.31464 | 0.931743 | 0.981625675 | 11 | 124403478 | 125266684 |
| dried-fruit-intake | PS | -0.0000503 | NA | NA | 2.53E-09 | NA | NA | 0.999874 | 0.999874 | 11 | 126304241 | 127306871 |
| dried-fruit-intake | PS | 0.232584 | -0.08762 | 0.57838 | 0.0540952 | 0 | 0.33452 | 0.140813 | 0.544641084 | 11 | 127306872 | 128262550 |
| dried-fruit-intake | PS | -0.270202 | -1 | 0.31641 | 0.0730089 | 0 | 1 | 0.332523 | 0.71108814 | 11 | 129451785 | 130500783 |
| dried-fruit-intake | PS | -0.222107 | -1 | 0.43983 | 0.0493314 | 0 | 1 | 0.457907 | 0.792338865 | 11 | 130500784 | 131424361 |
| dried-fruit-intake | PS | -0.127453 | -0.50674 | 0.21604 | 0.0162442 | 0 | 0.25776 | 0.465407 | 0.795405161 | 11 | 133521643 | 134351064 |
| dried-fruit-intake | PS | 0.0540811 | -0.55935 | 0.72511 | 0.00292476 | 0 | 0.67266 | 0.83769 | 0.948975213 | 11 | 134351065 | 134946450 |
| dried-fruit-intake | PS | 0.286023 | -0.03606 | 0.63907 | 0.081809 | 0 | 0.40841 | 0.0776018 | 0.457283004 | 12 | 3069507 | 3871114 |
| dried-fruit-intake | PS | 0.784565 | 0.3863 | 1 | 0.615543 | 0.14923 | 1 | 0.000234491 | 0.05598169 | 12 | 4967644 | 6023700 |
| dried-fruit-intake | PS | -0.0533806 | -0.35812 | 0.24124 | 0.00284949 | 0 | 0.1334 | 0.714587 | 0.906613519 | 12 | 6023701 | 6948954 |
| dried-fruit-intake | PS | 0.19653 | -0.3761 | 0.89105 | 0.0386241 | 0 | 0.80852 | 0.460992 | 0.793255992 | 12 | 8123318 | 8760628 |
| dried-fruit-intake | PS | -0.385168 | -1 | 0.04382 | 0.148354 | 0 | 1 | 0.0863425 | 0.470432463 | 12 | 8760629 | 10176713 |
| dried-fruit-intake | PS | 0.289634 | -0.4153 | 1 | 0.0838878 | 0 | 1 | 0.370366 | 0.743772391 | 12 | 11742150 | 12721874 |
| dried-fruit-intake | PS | -0.528738 | -1 | -0.07902 | 0.279564 | 0.00958 | 1 | 0.026021 | 0.305371 | 12 | 12721875 | 13559527 |
| dried-fruit-intake | PS | -0.203881 | -0.63607 | 0.18508 | 0.0415675 | 0 | 0.40535 | 0.289727 | 0.675011382 | 12 | 13559528 | 14656849 |
| dried-fruit-intake | PS | -0.293641 | -1 | 0.19845 | 0.0862248 | 0 | 1 | 0.233525 | 0.622973542 | 12 | 14656850 | 16136742 |
| dried-fruit-intake | PS | 0.0790118 | -0.56466 | 0.82958 | 0.00624287 | 0 | 0.8351 | 0.773252 | 0.92959111 | 12 | 16136743 | 17374895 |
| dried-fruit-intake | PS | -0.0267029 | -0.90347 | 0.84157 | 0.000713045 | 0 | 1 | 0.934574 | 0.982241359 | 12 | 20074931 | 20866285 |
| dried-fruit-intake | PS | -0.0409904 | -0.44397 | 0.34768 | 0.00168022 | 0 | 0.22681 | 0.82929 | 0.946591485 | 12 | 22928056 | 23923798 |
| dried-fruit-intake | PS | -0.739572 | -1 | -0.2953 | 0.546967 | 0.0872 | 1 | 0.00197423 | 0.145139734 | 12 | 23923799 | 25058714 |
| dried-fruit-intake | PS | 0.126562 | -0.17448 | 0.44194 | 0.0160179 | 0 | 0.19613 | 0.397305 | 0.756176066 | 12 | 25058715 | 25990813 |
| dried-fruit-intake | PS | -0.169727 | -0.63112 | 0.23961 | 0.0288074 | 0 | 0.40121 | 0.393778 | 0.75518435 | 12 | 25990814 | 26958056 |
| dried-fruit-intake | PS | 0.345969 | -0.10196 | 0.96394 | 0.119694 | 0 | 0.92918 | 0.133628 | 0.538438962 | 12 | 27797263 | 28753585 |
| dried-fruit-intake | PS | 0.42694 | -0.18722 | 1 | 0.182278 | 0 | 1 | 0.150049 | 0.55216732 | 12 | 28753586 | 29647193 |
| dried-fruit-intake | PS | -0.0637853 | -0.86015 | 0.6358 | 0.00406857 | 0 | 0.91757 | 0.829934 | 0.946591485 | 12 | 29647194 | 30358377 |
| dried-fruit-intake | PS | 0.39839 | -0.50092 | 1 | 0.158715 | 0 | 1 | 0.309194 | 0.692136809 | 12 | 43980532 | 44923825 |
| dried-fruit-intake | PS | 0.114571 | -0.51899 | 0.83811 | 0.0131264 | 0 | 0.75615 | 0.668055 | 0.894208045 | 12 | 48960266 | 50344346 |
| dried-fruit-intake | PS | 0.133054 | -0.20493 | 0.49182 | 0.0177033 | 0 | 0.24321 | 0.419086 | 0.767893591 | 12 | 51769420 | 53039987 |
| dried-fruit-intake | PS | -0.117813 | -0.5897 | 0.31337 | 0.0138798 | 0 | 0.35424 | 0.55977 | 0.844653041 | 12 | 54371449 | 55416802 |
| dried-fruit-intake | PS | 0.0185946 | -0.5161 | 0.56948 | 0.000345758 | 0 | 0.47601 | 0.935024 | 0.982241359 | 12 | 55416803 | 56987105 |
| dried-fruit-intake | PS | -0.45553 | -1 | 0.06702 | 0.207508 | 0 | 1 | 0.0850114 | 0.467419583 | 12 | 56987106 | 58748139 |
| dried-fruit-intake | PS | 0.337717 | -0.15539 | 1 | 0.114053 | 0 | 1 | 0.166541 | 0.579193756 | 12 | 58748140 | 60000363 |
| dried-fruit-intake | PS | 0.713185 | 0.19596 | 1 | 0.508632 | 0.04102 | 1 | 0.0106213 | 0.2442899 | 12 | 61737954 | 63055936 |
| dried-fruit-intake | PS | -0.0606785 | -0.96162 | 0.73692 | 0.00368188 | 0 | 1 | 0.848307 | 0.953724841 | 12 | 63055937 | 63764111 |
| dried-fruit-intake | PS | -0.125159 | -0.65506 | 0.34173 | 0.0156649 | 0 | 0.44136 | 0.574625 | 0.850736741 | 12 | 64403858 | 66114643 |
| dried-fruit-intake | PS | -0.338944 | -0.81634 | 0.03865 | 0.114883 | 0 | 0.6664 | 0.0810765 | 0.460358212 | 12 | 66114644 | 67183620 |
| dried-fruit-intake | PS | -0.262362 | -1 | 0.5565 | 0.0688338 | 0 | 1 | 0.457136 | 0.791625756 | 12 | 68006683 | 68839661 |
| dried-fruit-intake | PS | 0.20651 | -0.28609 | 0.79091 | 0.0426464 | 0 | 0.63433 | 0.379185 | 0.746934988 | 12 | 68839662 | 70097805 |
| dried-fruit-intake | PS | -0.187682 | -0.8047 | 0.32776 | 0.0352247 | 0 | 0.66265 | 0.445174 | 0.783590257 | 12 | 79315179 | 80952472 |
| dried-fruit-intake | PS | -0.361183 | -1 | 0.57507 | 0.130453 | 0 | 1 | 0.376252 | 0.744326334 | 12 | 80952473 | 81843890 |
| dried-fruit-intake | PS | 0.501808 | 0.0808 | 1 | 0.251811 | 0.00921 | 1 | 0.0257013 | 0.305371 | 12 | 88344765 | 90567001 |
| dried-fruit-intake | PS | -0.205179 | -0.83467 | 0.30745 | 0.0420983 | 0 | 0.70368 | 0.408254 | 0.766733809 | 12 | 90567002 | 92061179 |
| dried-fruit-intake | PS | -0.10285 | -0.8817 | 0.56351 | 0.0105782 | 0 | 0.88807 | 0.718354 | 0.907271056 | 12 | 92061180 | 93487547 |
| dried-fruit-intake | PS | -0.513197 | -1 | -0.03996 | 0.263371 | 0.00572 | 1 | 0.0396995 | 0.353293098 | 12 | 93487548 | 94385884 |
| dried-fruit-intake | PS | -0.318673 | -1 | 0.262 | 0.101553 | 0 | 1 | 0.252534 | 0.640696318 | 12 | 94385885 | 95147845 |
| dried-fruit-intake | PS | -0.0212865 | -0.44327 | 0.4057 | 0.000453115 | 0 | 0.25779 | 0.913389 | 0.977166335 | 12 | 95147846 | 96017782 |
| dried-fruit-intake | PS | 0.201265 | -0.38535 | 1 | 0.0405074 | 0 | 1 | 0.443917 | 0.782424675 | 12 | 97814022 | 99244337 |
| dried-fruit-intake | PS | 0.0246411 | -0.43289 | 0.48475 | 0.000607186 | 0 | 0.30058 | 0.908186 | 0.97602352 | 12 | 99244338 | 100931423 |
| dried-fruit-intake | PS | 0.549678 | -0.01705 | 1 | 0.302146 | 0 | 1 | 0.0583956 | 0.402808045 | 12 | 101825062 | 102966633 |
| dried-fruit-intake | PS | -0.10002 | -0.78517 | 0.51077 | 0.0100041 | 0 | 0.70011 | 0.71214 | 0.906057359 | 12 | 102966634 | 104140831 |
| dried-fruit-intake | PS | 0.162566 | -0.59853 | 1 | 0.0264278 | 0 | 1 | 0.61023 | 0.861631208 | 12 | 106153788 | 106964977 |
| dried-fruit-intake | PS | -0.351511 | -1 | 0.20916 | 0.12356 | 0 | 1 | 0.200229 | 0.602877424 | 12 | 106964978 | 108183188 |
| dried-fruit-intake | PS | 0.198567 | -0.22491 | 0.67427 | 0.0394289 | 0 | 0.45667 | 0.328156 | 0.707166557 | 12 | 108183189 | 109031819 |
| dried-fruit-intake | PS | -0.773673 | -1 | -0.41876 | 0.59857 | 0.17536 | 1 | 0.0000699 | 0.032617075 | 12 | 109031820 | 110111514 |
| dried-fruit-intake | PS | -0.333802 | -0.99884 | 0.18266 | 0.111424 | 0 | 1 | 0.185067 | 0.58904054 | 12 | 110111515 | 111592381 |
| dried-fruit-intake | PS | -0.189839 | -0.53754 | 0.12506 | 0.0360389 | 0 | 0.28895 | 0.223741 | 0.620938095 | 12 | 111592382 | 113947983 |
| dried-fruit-intake | PS | -0.224575 | -1 | 0.52113 | 0.0504338 | 0 | 1 | 0.486583 | 0.805062382 | 12 | 115439452 | 116197675 |
| dried-fruit-intake | PS | -0.0333332 | -0.32462 | 0.25887 | 0.0011111 | 0 | 0.11801 | 0.818535 | 0.944542385 | 12 | 116197676 | 117091843 |
| dried-fruit-intake | PS | 0.173208 | -0.22866 | 0.61767 | 0.030001 | 0 | 0.38232 | 0.383842 | 0.751125208 | 12 | 117091844 | 118256124 |
| dried-fruit-intake | PS | 0.732899 | -0.05902 | 1 | 0.53714 | 0 | 1 | 0.0700392 | 0.439581033 | 12 | 118256125 | 119301061 |
| dried-fruit-intake | PS | 0.314109 | -0.34988 | 1 | 0.0986642 | 0 | 1 | 0.303606 | 0.687150579 | 12 | 119301062 | 120567740 |
| dried-fruit-intake | PS | -0.496837 | -1 | -0.04669 | 0.246847 | 0.00583 | 1 | 0.0361052 | 0.34720846 | 12 | 123396635 | 124843768 |
| dried-fruit-intake | PS | 0.0175579 | -0.65365 | 0.70808 | 0.000308279 | 0 | 0.70927 | 0.948902 | 0.98795147 | 12 | 129887419 | 130629840 |
| dried-fruit-intake | PS | -0.260614 | -1 | 0.27149 | 0.0679195 | 0 | 1 | 0.314655 | 0.695891758 | 12 | 130629841 | 131404042 |
| dried-fruit-intake | PS | -0.468061 | -1 | -0.02604 | 0.219081 | 0.00421 | 1 | 0.0412955 | 0.357174253 | 13 | 20491182 | 21540733 |
| dried-fruit-intake | PS | 0.212633 | -0.80143 | 1 | 0.045213 | 0 | 1 | 0.585183 | 0.855475038 | 13 | 26681710 | 27392005 |
| dried-fruit-intake | PS | -0.492422 | -1 | 0.13082 | 0.24248 | 0 | 1 | 0.12057 | 0.518850788 | 13 | 27392006 | 28587125 |
| dried-fruit-intake | PS | 0.192046 | -0.14623 | 0.53753 | 0.0368818 | 0 | 0.28894 | 0.245358 | 0.635983514 | 13 | 28587126 | 30068525 |
| dried-fruit-intake | PS | -0.413995 | -1 | 0.19027 | 0.171392 | 0 | 1 | 0.15927 | 0.57162178 | 13 | 30068526 | 31433218 |
| dried-fruit-intake | PS | -0.121568 | -0.6425 | 0.3542 | 0.0147788 | 0 | 0.42569 | 0.590441 | 0.855475038 | 13 | 31433219 | 32986686 |
| dried-fruit-intake | PS | -0.246088 | -1 | 0.39536 | 0.0605594 | 0 | 1 | 0.400431 | 0.759911474 | 13 | 35744569 | 36579413 |
| dried-fruit-intake | PS | 0.148829 | -0.49358 | 0.95754 | 0.02215 | 0 | 1 | 0.597935 | 0.857267651 | 13 | 40091624 | 41003943 |
| dried-fruit-intake | PS | -0.107663 | -0.48826 | 0.24815 | 0.0115912 | 0 | 0.24409 | 0.54376 | 0.838940829 | 13 | 42950158 | 43931931 |
| dried-fruit-intake | PS | 0.321352 | -0.04008 | 0.74018 | 0.103267 | 0 | 0.54836 | 0.0781632 | 0.457283004 | 13 | 43931932 | 45476446 |
| dried-fruit-intake | PS | 0.00292157 | -0.45583 | 0.45193 | 0.00000854 | 0 | 0.28708 | 0.988925 | 0.998310357 | 13 | 46493237 | 47433528 |
| dried-fruit-intake | PS | -0.105482 | -0.98879 | 0.6413 | 0.0111265 | 0 | 1 | 0.736021 | 0.917848257 | 13 | 49381728 | 50419896 |
| dried-fruit-intake | PS | 0.233811 | -0.06774 | 0.56387 | 0.0546677 | 0 | 0.31795 | 0.135671 | 0.540048903 | 13 | 50419897 | 51554236 |
| dried-fruit-intake | PS | -0.0244041 | -0.5025 | 0.44201 | 0.000595561 | 0 | 0.32263 | 0.910049 | 0.977061155 | 13 | 53336572 | 54684856 |
| dried-fruit-intake | PS | -0.618575 | -1 | -0.05783 | 0.382635 | 0.00891 | 1 | 0.0371774 | 0.350926523 | 13 | 56434008 | 58245843 |
| dried-fruit-intake | PS | 0.440081 | 0.04932 | 0.92388 | 0.193672 | 0.00449 | 0.85355 | 0.0292971 | 0.316835525 | 13 | 66382287 | 67718879 |
| dried-fruit-intake | PS | 0.490662 | -0.42935 | 1 | 0.24075 | 0 | 1 | 0.257912 | 0.643621228 | 13 | 67718880 | 69004702 |
| dried-fruit-intake | PS | -0.0904438 | -0.59271 | 0.36869 | 0.00818009 | 0 | 0.36661 | 0.67903 | 0.897275367 | 13 | 71010209 | 71976862 |
| dried-fruit-intake | PS | -0.0785416 | -0.96257 | 0.72473 | 0.00616878 | 0 | 1 | 0.8076 | 0.942903878 | 13 | 76671494 | 77460044 |
| dried-fruit-intake | PS | -0.458662 | -1 | 0.10513 | 0.210371 | 0 | 1 | 0.0949963 | 0.482879102 | 13 | 79489046 | 80778339 |
| dried-fruit-intake | PS | 0.325023 | -0.49458 | 1 | 0.10564 | 0 | 1 | 0.368758 | 0.742612287 | 13 | 80778340 | 81724089 |
| dried-fruit-intake | PS | -0.665486 | -1 | 0.10496 | 0.442872 | 0 | 1 | 0.0985668 | 0.485549274 | 13 | 86321289 | 87043588 |
| dried-fruit-intake | PS | 0.428361 | -0.0377 | 1 | 0.183493 | 0 | 1 | 0.0662273 | 0.426779407 | 13 | 91764205 | 93285142 |
| dried-fruit-intake | PS | 0.271052 | -0.09236 | 0.70253 | 0.0734693 | 0 | 0.49401 | 0.139941 | 0.542539552 | 13 | 94925137 | 96132647 |
| dried-fruit-intake | PS | -0.682611 | -1 | -0.09778 | 0.465958 | 0.01503 | 1 | 0.0268821 | 0.305371 | 13 | 97516610 | 98527335 |
| dried-fruit-intake | PS | -0.368976 | -1 | 0.12728 | 0.136143 | 0 | 1 | 0.140037 | 0.542539552 | 13 | 98527336 | 99402294 |
| dried-fruit-intake | PS | -0.163768 | -1 | 0.48326 | 0.0268199 | 0 | 1 | 0.567729 | 0.84705478 | 13 | 99402295 | 100470868 |
| dried-fruit-intake | PS | 0.0876567 | -0.54084 | 0.78273 | 0.00768369 | 0 | 0.72653 | 0.754694 | 0.923275238 | 13 | 100470869 | 101573736 |
| dried-fruit-intake | PS | -0.103015 | -0.80398 | 0.48699 | 0.0106121 | 0 | 0.71911 | 0.694437 | 0.903592034 | 13 | 101573737 | 103050417 |
| dried-fruit-intake | PS | 0.421982 | -0.11004 | 1 | 0.178069 | 0 | 1 | 0.104412 | 0.497135592 | 13 | 104378436 | 105672500 |
| dried-fruit-intake | PS | -0.201416 | -0.82364 | 0.31961 | 0.0405682 | 0 | 0.69679 | 0.425496 | 0.772468002 | 13 | 105672501 | 106313847 |
| dried-fruit-intake | PS | -0.0603151 | -0.43404 | 0.30373 | 0.00363791 | 0 | 0.20131 | 0.736406 | 0.917849189 | 13 | 108521979 | 109156765 |
| dried-fruit-intake | PS | 0.076953 | -0.52979 | 0.72291 | 0.00592176 | 0 | 0.63049 | 0.775318 | 0.929934281 | 13 | 109156766 | 109813576 |
| dried-fruit-intake | PS | -0.565303 | -1 | -0.01529 | 0.319568 | 0.00535 | 1 | 0.0454835 | 0.364895451 | 13 | 109813577 | 110995432 |
| dried-fruit-intake | PS | -0.0566366 | -0.44399 | 0.31383 | 0.0032077 | 0 | 0.21257 | 0.75557 | 0.923275238 | 13 | 111621245 | 112319064 |
| dried-fruit-intake | PS | -0.349487 | -1 | 0.12198 | 0.122141 | 0 | 1 | 0.137351 | 0.540048903 | 13 | 113573119 | 114302561 |
| dried-fruit-intake | PS | 0.22555 | -0.30941 | 1 | 0.050873 | 0 | 1 | 0.373116 | 0.744263178 | 14 | 21982655 | 22760700 |
| dried-fruit-intake | PS | -0.486598 | -1 | 0.21465 | 0.236778 | 0 | 1 | 0.155324 | 0.563027951 | 14 | 22760701 | 23985936 |
| dried-fruit-intake | PS | 0.298498 | -0.22643 | 0.98673 | 0.0891012 | 0 | 0.9802 | 0.235456 | 0.624200355 | 14 | 23985937 | 24906056 |
| dried-fruit-intake | PS | 0.178998 | -0.25129 | 0.66475 | 0.0320404 | 0 | 0.44696 | 0.394687 | 0.755963245 | 14 | 25585042 | 26395690 |
| dried-fruit-intake | PS | 0.209987 | -0.10954 | 0.53942 | 0.0440945 | 0 | 0.29097 | 0.185298 | 0.58904054 | 14 | 26395691 | 27720240 |
| dried-fruit-intake | PS | -0.192888 | -0.86097 | 0.36464 | 0.0372057 | 0 | 0.76705 | 0.459772 | 0.792607357 | 14 | 27720241 | 29029224 |
| dried-fruit-intake | PS | -0.00622383 | -0.43949 | 0.42516 | 0.0000387 | 0 | 0.26404 | 0.975266 | 0.995069902 | 14 | 36422078 | 37282012 |
| dried-fruit-intake | PS | 0.3311 | -0.24832 | 1 | 0.109627 | 0 | 1 | 0.226382 | 0.620938095 | 14 | 37282013 | 38722114 |
| dried-fruit-intake | PS | 1 | 0.20491 | 1 | 1 | 0.04947 | 1 | 0.013081 | 0.26371942 | 14 | 51418372 | 52206122 |
| dried-fruit-intake | PS | -0.0243519 | -0.74133 | 0.64236 | 0.000593015 | 0 | 0.7189 | 0.932168 | 0.981625675 | 14 | 54359599 | 55292832 |
| dried-fruit-intake | PS | -0.136868 | -1 | 0.84653 | 0.018733 | 0 | 1 | 0.727389 | 0.913309359 | 14 | 55292833 | 56206430 |
| dried-fruit-intake | PS | -0.47248 | -1 | -0.00652 | 0.223237 | 0.0029 | 1 | 0.0513043 | 0.378238925 | 14 | 56206431 | 57460781 |
| dried-fruit-intake | PS | -0.261384 | -0.93254 | 0.2388 | 0.0683215 | 0 | 0.87534 | 0.283058 | 0.668934463 | 14 | 58447799 | 59447537 |
| dried-fruit-intake | PS | 0.242988 | -0.28346 | 0.88217 | 0.0590433 | 0 | 0.79129 | 0.326739 | 0.706605148 | 14 | 61652817 | 62717985 |
| dried-fruit-intake | PS | -0.628842 | -1 | -0.29919 | 0.395442 | 0.08952 | 1 | 0.000381388 | 0.064213759 | 14 | 69794543 | 71140426 |
| dried-fruit-intake | PS | -0.646422 | -1 | -0.08077 | 0.417862 | 0.0119 | 1 | 0.0333514 | 0.335155915 | 14 | 71140427 | 72665319 |
| dried-fruit-intake | PS | 0.130641 | -0.4077 | 0.84656 | 0.0170671 | 0 | 0.78138 | 0.590727 | 0.855475038 | 14 | 75699502 | 76694201 |
| dried-fruit-intake | PS | 0.13127 | -0.29654 | 0.58784 | 0.0172317 | 0 | 0.35092 | 0.509521 | 0.822603387 | 14 | 76694202 | 77425453 |
| dried-fruit-intake | PS | -0.118533 | -0.98158 | 0.60251 | 0.0140502 | 0 | 1 | 0.69917 | 0.903972224 | 14 | 77425454 | 78374053 |
| dried-fruit-intake | PS | 0.0994125 | -0.69838 | 1 | 0.00988285 | 0 | 1 | 0.760432 | 0.926476855 | 14 | 79199452 | 81001920 |
| dried-fruit-intake | PS | 0.180095 | -0.44809 | 1 | 0.0324341 | 0 | 1 | 0.520628 | 0.823025677 | 14 | 82524786 | 84087372 |
| dried-fruit-intake | PS | 0.382664 | -0.33677 | 1 | 0.146432 | 0 | 1 | 0.246622 | 0.637199691 | 14 | 93386329 | 94892240 |
| dried-fruit-intake | PS | -0.0908327 | -0.4313 | 0.23471 | 0.00825057 | 0 | 0.18861 | 0.573127 | 0.850422201 | 14 | 97174315 | 98268391 |
| dried-fruit-intake | PS | -0.305051 | -0.87071 | 0.1397 | 0.0930558 | 0 | 0.75856 | 0.174762 | 0.582296617 | 14 | 98268392 | 98885322 |
| dried-fruit-intake | PS | 0.273329 | -0.49672 | 1 | 0.0747086 | 0 | 1 | 0.416525 | 0.767893591 | 14 | 98885323 | 99474533 |
| dried-fruit-intake | PS | 0.199026 | -0.19902 | 0.63491 | 0.0396115 | 0 | 0.40649 | 0.304908 | 0.688484504 | 14 | 99474534 | 100786189 |
| dried-fruit-intake | PS | -0.153649 | -0.80335 | 0.38459 | 0.0236079 | 0 | 0.66875 | 0.538526 | 0.835546753 | 14 | 100786190 | 102004377 |
| dried-fruit-intake | PS | -0.168443 | -0.94838 | 0.46854 | 0.028373 | 0 | 0.94732 | 0.551715 | 0.843586699 | 14 | 104439107 | 105091340 |
| dried-fruit-intake | PS | 0.133232 | -0.25143 | 0.53578 | 0.0177508 | 0 | 0.29044 | 0.475599 | 0.800015277 | 15 | 22799927 | 24099946 |
| dried-fruit-intake | PS | 0.179243 | -0.1153 | 0.50129 | 0.0321281 | 0 | 0.25129 | 0.232084 | 0.622831836 | 15 | 25384328 | 26392947 |
| dried-fruit-intake | PS | -0.0702486 | -0.89355 | 0.66493 | 0.00493486 | 0 | 0.98194 | 0.819303 | 0.944542385 | 15 | 29141036 | 30604119 |
| dried-fruit-intake | PS | -0.0875438 | -1 | 0.70586 | 0.00766391 | 0 | 1 | 0.785435 | 0.933113527 | 15 | 30604120 | 32177320 |
| dried-fruit-intake | PS | -0.54865 | -1 | 0.08385 | 0.301017 | 0 | 1 | 0.0819236 | 0.460520615 | 15 | 32177321 | 33484267 |
| dried-fruit-intake | PS | 0.403017 | -0.03656 | 0.96905 | 0.162423 | 0 | 0.93905 | 0.0702625 | 0.439611734 | 15 | 34410073 | 35118927 |
| dried-fruit-intake | PS | -0.338331 | -1 | 0.15625 | 0.114468 | 0 | 1 | 0.168459 | 0.58097898 | 15 | 37962916 | 39238840 |
| dried-fruit-intake | PS | -0.184424 | -0.64703 | 0.23133 | 0.0340124 | 0 | 0.42241 | 0.368344 | 0.742599694 | 15 | 39238841 | 40604780 |
| dried-fruit-intake | PS | 0.237026 | -0.31946 | 0.87803 | 0.0561811 | 0 | 0.78348 | 0.349629 | 0.725669948 | 15 | 42332686 | 44987755 |
| dried-fruit-intake | PS | 0.256749 | -0.36382 | 1 | 0.0659203 | 0 | 1 | 0.376503 | 0.744326334 | 15 | 46022643 | 46884071 |
| dried-fruit-intake | PS | -0.402874 | -0.91854 | -0.006 | 0.162308 | 0.00219 | 0.84372 | 0.0557914 | 0.393790014 | 15 | 46884072 | 47693316 |
| dried-fruit-intake | PS | -0.273084 | -0.63857 | 0.05293 | 0.0745751 | 0 | 0.40777 | 0.102791 | 0.496571285 | 15 | 47693317 | 49260006 |
| dried-fruit-intake | PS | -0.637018 | -1 | 0.03802 | 0.405792 | 0 | 1 | 0.0716343 | 0.442981945 | 15 | 49260007 | 50195876 |
| dried-fruit-intake | PS | -0.276158 | -0.6883 | 0.09486 | 0.0762633 | 0 | 0.47375 | 0.13578 | 0.540048903 | 15 | 51605478 | 53263126 |
| dried-fruit-intake | PS | -0.11774 | -0.7018 | 0.36986 | 0.0138628 | 0 | 0.53299 | 0.600823 | 0.85876933 | 15 | 54332800 | 55136717 |
| dried-fruit-intake | PS | 0.209552 | -0.29427 | 0.80406 | 0.0439121 | 0 | 0.66127 | 0.388672 | 0.753354749 | 15 | 57641165 | 58712954 |
| dried-fruit-intake | PS | -0.225344 | -0.87122 | 0.26457 | 0.05078 | 0 | 0.76817 | 0.340508 | 0.716609936 | 15 | 59901117 | 61130595 |
| dried-fruit-intake | PS | -0.0181714 | -0.56686 | 0.52754 | 0.000330199 | 0 | 0.42618 | 0.939562 | 0.984629321 | 15 | 61130596 | 62106138 |
| dried-fruit-intake | PS | -0.0361879 | -0.38972 | 0.30247 | 0.00130956 | 0 | 0.16668 | 0.830079 | 0.946591485 | 15 | 62106139 | 63218978 |
| dried-fruit-intake | PS | -0.0803021 | -0.87877 | 0.62085 | 0.00644842 | 0 | 0.94293 | 0.777306 | 0.929934281 | 15 | 64339946 | 66355634 |
| dried-fruit-intake | PS | -0.0435561 | -0.51504 | 0.41445 | 0.00189713 | 0 | 0.30396 | 0.837453 | 0.948975213 | 15 | 66355635 | 67396520 |
| dried-fruit-intake | PS | -0.428071 | -1 | 0.07787 | 0.183245 | 0 | 1 | 0.0958841 | 0.482879102 | 15 | 69089816 | 70767983 |
| dried-fruit-intake | PS | -0.337911 | -1 | 0.22883 | 0.114184 | 0 | 1 | 0.213808 | 0.610690702 | 15 | 70767984 | 72058129 |
| dried-fruit-intake | PS | 0.133601 | -0.43537 | 0.78483 | 0.0178493 | 0 | 0.66278 | 0.602699 | 0.859194646 | 15 | 74458114 | 76401952 |
| dried-fruit-intake | PS | 0.0397945 | -0.28831 | 0.37348 | 0.00158361 | 0 | 0.15483 | 0.805366 | 0.941740696 | 15 | 79292537 | 79998206 |
| dried-fruit-intake | PS | -0.201662 | -0.94201 | 0.37396 | 0.0406676 | 0 | 0.90024 | 0.45486 | 0.790019529 | 15 | 79998207 | 81077025 |
| dried-fruit-intake | PS | 0.29739 | -0.53154 | 1 | 0.0884409 | 0 | 1 | 0.41915 | 0.767893591 | 15 | 84209761 | 85494083 |
| dried-fruit-intake | PS | 0.0181454 | -0.3746 | 0.414 | 0.000329256 | 0 | 0.20971 | 0.922554 | 0.979220463 | 15 | 86341599 | 87158587 |
| dried-fruit-intake | PS | 0.0685344 | -0.45331 | 0.61201 | 0.00469697 | 0 | 0.43457 | 0.776937 | 0.929934281 | 15 | 87158588 | 88035757 |
| dried-fruit-intake | PS | -0.904721 | -1 | -0.11012 | 0.81852 | 0.02156 | 1 | 0.0268422 | 0.305371 | 15 | 90632719 | 91593623 |
| dried-fruit-intake | PS | -0.0401569 | -0.90152 | 0.76437 | 0.00161257 | 0 | 1 | 0.898016 | 0.97180923 | 15 | 91593624 | 92675405 |
| dried-fruit-intake | PS | -0.610936 | -1 | -0.02324 | 0.373243 | 0.00553 | 1 | 0.0455068 | 0.364895451 | 15 | 92675406 | 93707010 |
| dried-fruit-intake | PS | 0.193277 | -0.242 | 0.68095 | 0.0373559 | 0 | 0.46682 | 0.357033 | 0.732977849 | 15 | 93707011 | 94565521 |
| dried-fruit-intake | PS | -0.269073 | -0.96508 | 0.21563 | 0.0724004 | 0 | 0.94016 | 0.247945 | 0.637715318 | 15 | 94565522 | 95662425 |
| dried-fruit-intake | PS | -0.226566 | -0.66185 | 0.15459 | 0.051332 | 0 | 0.43804 | 0.235646 | 0.624200355 | 15 | 95662426 | 96864278 |
| dried-fruit-intake | PS | 0.0321121 | -0.41721 | 0.46455 | 0.00103118 | 0 | 0.27225 | 0.873839 | 0.962309464 | 15 | 96864279 | 98025684 |
| dried-fruit-intake | PS | 0.344932 | -0.20332 | 1 | 0.118978 | 0 | 1 | 0.202682 | 0.602877424 | 15 | 98828262 | 99925972 |
| dried-fruit-intake | PS | 0.381015 | -0.23237 | 1 | 0.145172 | 0 | 1 | 0.202037 | 0.602877424 | 15 | 99925973 | 100742117 |
| dried-fruit-intake | PS | 0.244261 | -0.3426 | 1 | 0.0596633 | 0 | 1 | 0.37315 | 0.744263178 | 15 | 100742118 | 101550750 |
| dried-fruit-intake | PS | -0.0392597 | -0.79484 | 0.6759 | 0.00154132 | 0 | 0.88325 | 0.891308 | 0.970984632 | 15 | 101550751 | 102520975 |
| dried-fruit-intake | PS | -0.685527 | -1 | -0.17562 | 0.469947 | 0.03165 | 1 | 0.0118067 | 0.252030603 | 16 | 4816146 | 5782968 |
| dried-fruit-intake | PS | -0.239683 | -1 | 0.42478 | 0.057448 | 0 | 1 | 0.42915 | 0.772599009 | 16 | 5782969 | 6446081 |
| dried-fruit-intake | PS | -0.250523 | -0.94622 | 0.22342 | 0.0627617 | 0 | 0.90582 | 0.280583 | 0.667431958 | 16 | 7051430 | 7704354 |
| dried-fruit-intake | PS | 0.0790418 | -0.52768 | 0.706 | 0.0062476 | 0 | 0.59483 | 0.763589 | 0.928128647 | 16 | 8341013 | 9104469 |
| dried-fruit-intake | PS | 0.370166 | -0.33773 | 1 | 0.137023 | 0 | 1 | 0.267687 | 0.652437121 | 16 | 9754797 | 10351808 |
| dried-fruit-intake | PS | -0.0651482 | -0.53831 | 0.35984 | 0.00424429 | 0 | 0.32428 | 0.741118 | 0.920037908 | 16 | 11022543 | 11916631 |
| dried-fruit-intake | PS | 0.0318297 | -0.54387 | 0.60777 | 0.00101313 | 0 | 0.46711 | 0.896921 | 0.971785522 | 16 | 11916632 | 12793149 |
| dried-fruit-intake | PS | -0.197868 | -0.6508 | 0.17691 | 0.0391517 | 0 | 0.42637 | 0.29472 | 0.677856 | 16 | 12793150 | 13893407 |
| dried-fruit-intake | PS | 0.430062 | -0.06203 | 1 | 0.184953 | 0 | 1 | 0.0819165 | 0.460520615 | 16 | 13893408 | 15921108 |
| dried-fruit-intake | PS | 0.181725 | -0.15801 | 0.54709 | 0.0330239 | 0 | 0.30017 | 0.284435 | 0.670248709 | 16 | 15921109 | 17343277 |
| dried-fruit-intake | PS | 0.133819 | -0.32207 | 0.62113 | 0.0179075 | 0 | 0.39814 | 0.536736 | 0.833958029 | 16 | 19104258 | 20351261 |
| dried-fruit-intake | PS | -0.600819 | -1 | -0.10277 | 0.360984 | 0.0136 | 1 | 0.0209827 | 0.292402657 | 16 | 24014706 | 25235251 |
| dried-fruit-intake | PS | 0.510944 | 0.05857 | 1 | 0.261064 | 0.00631 | 1 | 0.0330693 | 0.33448289 | 16 | 25235252 | 26154122 |
| dried-fruit-intake | PS | 0.113583 | -0.20549 | 0.45989 | 0.012901 | 0 | 0.21498 | 0.473781 | 0.798104958 | 16 | 26154123 | 27443061 |
| dried-fruit-intake | PS | -0.20486 | -0.66588 | 0.18149 | 0.0419676 | 0 | 0.44488 | 0.284014 | 0.669739873 | 16 | 27443062 | 29043177 |
| dried-fruit-intake | PS | -0.0253719 | -0.49194 | 0.42288 | 0.000643735 | 0 | 0.28933 | 0.903404 | 0.974089622 | 16 | 29043178 | 31384210 |
| dried-fruit-intake | PS | 0.242553 | -0.65883 | 1 | 0.0588318 | 0 | 1 | 0.518608 | 0.822603387 | 16 | 35259454 | 49010761 |
| dried-fruit-intake | PS | -0.249679 | -0.93195 | 0.2588 | 0.0623397 | 0 | 0.87003 | 0.313195 | 0.695891758 | 16 | 53393883 | 54866095 |
| dried-fruit-intake | PS | 0.408239 | -0.04988 | 1 | 0.166659 | 0 | 1 | 0.0783425 | 0.457283004 | 16 | 54866096 | 55907389 |
| dried-fruit-intake | PS | -0.129128 | -0.71003 | 0.39057 | 0.016674 | 0 | 0.52317 | 0.589217 | 0.855475038 | 16 | 61092845 | 62607090 |
| dried-fruit-intake | PS | -0.154889 | -1 | 0.53764 | 0.0239905 | 0 | 1 | 0.605399 | 0.860368673 | 16 | 62607091 | 64207176 |
| dried-fruit-intake | PS | -0.103107 | -0.69498 | 0.43682 | 0.0106311 | 0 | 0.5209 | 0.677099 | 0.89679545 | 16 | 65072404 | 65882820 |
| dried-fruit-intake | PS | -0.134513 | -0.56731 | 0.26857 | 0.0180937 | 0 | 0.32685 | 0.496489 | 0.811076807 | 16 | 65882821 | 66738843 |
| dried-fruit-intake | PS | 0.0343751 | -0.61074 | 0.74561 | 0.00118165 | 0 | 0.79324 | 0.897884 | 0.97180923 | 16 | 68435729 | 69549149 |
| dried-fruit-intake | PS | -1 | -1 | -0.53088 | 1 | 0.28184 | 1 | 0.0000627 | 0.032617075 | 16 | 72089512 | 73140781 |
| dried-fruit-intake | PS | -0.375252 | -1 | 0.10385 | 0.140814 | 0 | 1 | 0.120578 | 0.518850788 | 16 | 73140782 | 74135275 |
| dried-fruit-intake | PS | -0.697813 | -1 | 0.05173 | 0.486943 | 0 | 1 | 0.0720856 | 0.442981945 | 16 | 76635468 | 77270665 |
| dried-fruit-intake | PS | 0.396077 | -0.20745 | 1 | 0.156877 | 0 | 1 | 0.174986 | 0.582296617 | 16 | 77739133 | 78280636 |
| dried-fruit-intake | PS | -0.243251 | -0.86733 | 0.24628 | 0.0591708 | 0 | 0.75256 | 0.30758 | 0.6899425 | 16 | 78973581 | 79662634 |
| dried-fruit-intake | PS | 0.162056 | -0.52255 | 0.97729 | 0.0262622 | 0 | 1 | 0.584898 | 0.855475038 | 16 | 79662635 | 80559685 |
| dried-fruit-intake | PS | 0.00413386 | -0.86939 | 0.8858 | 0.0000171 | 0 | 1 | 0.989962 | 0.998310357 | 16 | 80559686 | 81437861 |
| dried-fruit-intake | PS | -0.623314 | -1 | 0.01519 | 0.38852 | 0 | 1 | 0.0599391 | 0.406350706 | 16 | 83077870 | 83778371 |
[truncated: 27,905 more chars]
